# Supplementary material for: Organocatalytic enantioselective Diels–Alder reaction between hydroxymaleimides and in situ generated nitrosoalkenes for direct preparation of chiral hemiketals with 1,2-oxazine skeleton
Source: Royal Society of Chemistry journal article supplement (doi:10.1039/d1qo01022k), 2021-01-01

*Supporting Information*

# **Organocatalytic Enantioselective Diels-Alder Reaction between Hydroxymaleimides and in situ Generated Nitrosoalkenes for Direct Preparation of Chiral Hemiketals with 1,2-Oxazine Skeleton**

Min Xiang<sup>a,b</sup>, Chen-Yi Li<sup>a,b</sup>, Jian zhang<sup>a,b</sup>, Ying Zou<sup>a,b</sup>, Wen-Sheng Li<sup>a,b</sup>, Fang Tian<sup>a</sup>, Wen-Juan Wan<sup>\*,a</sup>, Li-Xin Wang<sup>\*,a</sup>

<sup>a</sup> Key Laboratory of Asymmetric Synthesis and Chirotechnology of Sichuan Province, Chengdu Institute of Organic Chemistry Chinese Academy of Sciences, Chengdu 610041, China.

<sup>b</sup> University of Chinese Academy of Sciences, Beijing 100049, China.

## **Table of Contents**

|                                                                        |           |
|------------------------------------------------------------------------|-----------|
| <b>1 General remarks .....</b>                                         | <b>2</b>  |
| <b>2 General procedures for the syntheses of compounds 1a-1s .....</b> | <b>2</b>  |
| <b>3 X-ray crystallographic data of compound 3aa, 3an' .....</b>       | <b>4</b>  |
| <b>4 Procedures and characterization data .....</b>                    | <b>7</b>  |
| <b>5 HPLC, NMR and HRMS spectra of products .....</b>                  | <b>25</b> |

## 1 General remarks

Chemicals were purchased from commercial suppliers and used without further purification unless otherwise stated. Reactions were monitored by TLC and visualized with ultraviolet light. Flash column chromatography was performed on silica gels (300-400 mesh) eluting with ethyl acetate, dichloromethane and petroleum ether.  $^1\text{H}$  NMR and  $^{13}\text{C}$  NMR spectra were recorded in DMSO- $d_6$  on a Bruker Avance instrument (600 MHz for  $^1\text{H}$  NMR, 150 MHz for  $^{13}\text{C}$  NMR; 300 MHz for  $^1\text{H}$  NMR, 75 MHz for  $^{13}\text{C}$  NMR).  $^1\text{H}$  NMR chemical shifts are reported in ppm relative to tetramethylsilane (TMS) with the solvent resonance employed as the internal standard (DMSO- $d_6$  at 2.50 ppm), chemical shift, multiplicity (s = singlet, d = doublet, t = triplet, m = multiplet), coupling constants (Hz) and integration.  $^{13}\text{C}$  NMR chemical shifts are reported in ppm from tetramethylsilane (TMS) with the solvent resonance as the internal standard (DMSO- $d_6$  at 39.52 ppm). High-resolution mass spectra (HRMS) analyses were obtained with the Thermo Scientific LTQ Orbitrap XL mass spectrometer and 1290 Infinity LC/6460 QQQMS. Enantiomeric excess was determined by HPLC analysis on chiralpak AD-H, IC, AY-H. Optical rotations were measured on a Perkin-Elmer 241 Polarimeter. Melting points were recorded on a Buchi Melting Point B-545.

## 2 General procedures for the syntheses of compounds 1a-1s

### 2.1 Hydroxymaleimides: 1a-1u and characterization data

**1a-1r** were prepared according to the literature.<sup>[1]</sup>

Typical preparation for 3-ethyl-4-hydroxy-1-phenyl-1H-pyrrole-2,5-dione **1a**.

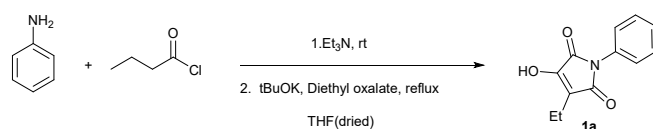

**Step-1:** A solution of aniline (1.06 g, 10 mmol, 1 equiv.) and triethylamine (1.21 g, 12 mmol, 1.2 equiv.) in 30 mL THF was placed in a round-bottomed flask which was stirred at 25 °C for 10 min, N-butyryl chloride (1.16 g, 11 mmol, 1.1 equiv.) is injected into the sealed bottle by a syringe and stirred at 25 °C for 3 h.

**Step-2:** Potassium tert-butoxide (2.80 g, 25 mmol, 2.5 equiv.) was slowly added to the reaction flask and stirred at 25 °C for 10 minutes, diethyl oxalate was added (3.65 g, 25 mmol, 2.5 equiv.) and stirred for 10 minutes. The reaction temperature was raised to 70 °C and stirred for another 12 h. After full consumption of the intermediate monitored by TLC. 2 M HCl (25 mL) was added to neutralize the residue to pH = 1. The aqueous solution was extracted with  $\text{CH}_2\text{Cl}_2$  (3×50 mL). The organic phases were combined, washed with brine and dried over anhydrous  $\text{Na}_2\text{SO}_4$ . After evaporation of solvent under reduced pressure, the crude product was purified by flash column chromatography petroleum ether/ethyl acetate (v(PE/EA) = 15/1 to 4/1) to afford product **1a** (Yellow solid, 1.35g, 67% yield).  $^1\text{H}$  NMR (300 MHz, DMSO- $d_6$ )  $\delta$  13.63 (s, 1H), 7.49-7.40 (m, 2H), 7.37-7.28 (m, 3H), 2.30 (q, J = 7.5 Hz, 2H), 1.08 (t, J = 7.5 Hz, 3H);  $^{13}\text{C}$  NMR (75 MHz, DMSO- $d_6$ )  $\delta$  171.0, 166.1, 152.5, 131.8, 128.8, 127.2, 126.5, 111.2, 14.3, 12.6. Consistent with previous reports in the literature.<sup>[1]</sup> Substrates **1b-1p** were prepared by the same procedures. 2-Chloroacetyl chloride is substituted for the preparation of **1s** with similar procedures as for **1a**.

### 2.1 $\alpha$ -bromoketoxime 2a-2o

$\alpha$ -bromoketoxime were prepared according to the reported methods described in the literatures.<sup>[2]</sup>

### 2.3 Catalysts 4a-4d

Catalysts **4** were prepared according to the reported methods described in the literatures.<sup>[3]</sup>

#### References:

- [1] a) Yang, Y.; Ren, H. X.; Chen, F.; Zhang, Z. B.; Zou, Y.; Chen, C.; Song, X. J.; Tian, F.; Peng, L.; Wang, L. X. Organocatalytic Asymmetric Annulation between Hydroxymaleimides and Nitrosoarenes: Stereoselective Preparation of Chiral Quaternary N-Hydroxyindolines. *Org. Lett.* **2017**, *19*, 2805-2808.; (b) Tantray, M. A.; Khan, I.; Hamid, H.; Alam, M. S. Synthesis of aryl anilinomaleimide based derivatives as glycogen synthase kinase-3 $\beta$  inhibitors with potential role as antidepressant agents. *New J. Chem.* **2016**, *40*, 6109-6119.
- [2] Wabnitz, T. C.; Saaby, S. Jørgensen, K. A. The first catalytic inverse-electron demand hetero-Diels-Alder reaction of nitrosoalkenes using pyrrolidine as an organocatalyst. *Org. Biomol. Chem.* **2004**, *2*, 828-834.
- [3] a) Vakulya, B.; Varga, S.; Csámpai, A. Soós, T. Highly Enantioselective Conjugate Addition of Nitromethane to Chalcones Using Bifunctional Cinchona Organocatalysts. *Org. Lett.* **2005**, *7*, 1967; (b) Zhu, Q.; Lu, Y. Stereocontrolled Creation of All-Carbon Quaternary Stereocenters by Organocatalytic Conjugate Addition of Oxindoles to Vinyl Sulfone. *Angew. Chem. Int. Ed.* **2010**, *49*, 7753-7756; *Angew. Chem.* **2010**, *122*, 7919-7922; (c) Badiola, E.; Fiser, B.; Gomez-Bengoa, E. Enantioselective Construction of Tetrasubstituted Stereogenic Carbons through Brønsted Base Catalyzed Michael Reactions:  $\alpha'$ -Hydroxy Enones as Key Enoate Equivalent. *J. Am. Chem. Soc.* **2014**, *136*, 17869-17881.

### 3 X-ray crystallographic data of compound 3aa, 3an'

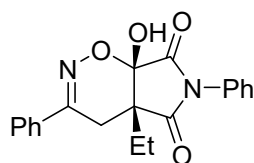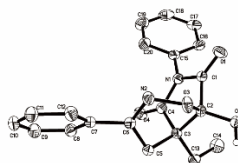

|                                         |                                                               |
|-----------------------------------------|---------------------------------------------------------------|
| <b>3aa</b>                              | CCDC 2075420                                                  |
| <b>Identification code</b>              | 20200668                                                      |
| <b>Empirical formula</b>                | C <sub>20</sub> H <sub>18</sub> N <sub>2</sub> O <sub>4</sub> |
| <b>Formula weight</b>                   | 350.36                                                        |
| <b>Temperature/K</b>                    | 293(2)                                                        |
| <b>Crystal system</b>                   | orthorhombic                                                  |
| <b>Space group</b>                      | P212121                                                       |
| <b>a/Å</b>                              | 7.69091(15)                                                   |
| <b>b/Å</b>                              | 11.2958(2)                                                    |
| <b>c/Å</b>                              | 20.0933(5)                                                    |
| <b>α/°</b>                              | 90                                                            |
| <b>β/°</b>                              | 90                                                            |
| <b>γ/°</b>                              | 90                                                            |
| <b>Volume/Å<sup>3</sup></b>             | 1745.61(6)                                                    |
| <b>Z</b>                                | 4                                                             |
| <b>ρ<sub>calc</sub>/cm<sup>3</sup></b>  | 1.333                                                         |
| <b>μ/mm<sup>-1</sup></b>                | 0.773                                                         |
| <b>F(000)</b>                           | 736.0                                                         |
| <b>Crystal size/mm<sup>3</sup></b>      | 0.14 × 0.12 × 0.09                                            |
| <b>Radiation</b>                        | CuKα (λ = 1.54184)                                            |
| <b>2θ range for data collection/°</b>   | 8.802 to 134.09                                               |
| <b>Index ranges</b>                     | -9 ≤ h ≤ 6, -13 ≤ k ≤ 13, -24 ≤ l ≤ 22                        |
| <b>Reflections collected</b>            | 12539                                                         |
| <b>Independent reflections</b>          | 3119 [R <sub>int</sub> = 0.0347, R <sub>sigma</sub> = 0.0271] |
| <b>Data/restraints/parameters</b>       | 3119/0/237                                                    |
| <b>Goodness-of-fit on F<sup>2</sup></b> | 1.068                                                         |
| <b>Final R indexes [I ≥ 2σ (I)]</b>     | R <sub>1</sub> = 0.0355, wR <sub>2</sub> = 0.0882             |

|                                                   |                           |
|---------------------------------------------------|---------------------------|
| <b>Final R indexes [all data]</b>                 | R1 = 0.0383, wR2 = 0.0913 |
| <b>Largest diff. peak/hole / e Å<sup>-3</sup></b> | 0.16/-0.25                |
| <b>Flack parameter</b>                            | -0.04(11)                 |

Single crystal of **3aa** was obtained by slow evaporation from CH<sub>3</sub>OH at 25 °C. ORTEP diagram of compound **3aa**, the ellipsoid contour probability levels: 50%.

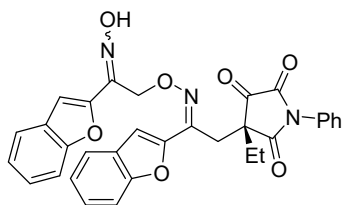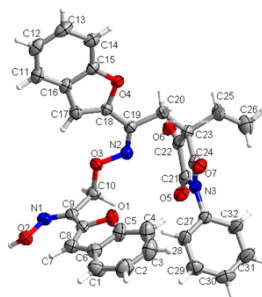

|                                        |                                                               |
|----------------------------------------|---------------------------------------------------------------|
| <b>3aa'</b>                            | CCDC 2075423                                                  |
| <b>Identification code</b>             | 20210342                                                      |
| <b>Empirical formula</b>               | C <sub>32</sub> H <sub>25</sub> N <sub>3</sub> O <sub>7</sub> |
| <b>Formula weight</b>                  | 563.55                                                        |
| <b>Temperature/K</b>                   | 293(2)                                                        |
| <b>Crystal system</b>                  | trigonal                                                      |
| <b>Space group</b>                     | P31                                                           |
| <b>a/Å</b>                             | 14.1958(4)                                                    |
| <b>b/Å</b>                             | 14.1958(4)                                                    |
| <b>c/Å</b>                             | 29.4228(9)                                                    |
| <b>α/°</b>                             | 90                                                            |
| <b>β/°</b>                             | 90                                                            |
| <b>γ/°</b>                             | 120                                                           |
| <b>Volume/Å<sup>3</sup></b>            | 5135.0(3)                                                     |
| <b>Z</b>                               | 6                                                             |
| <b>ρ<sub>calc</sub>/cm<sup>3</sup></b> | 1.093                                                         |
| <b>μ/mm<sup>-1</sup></b>               | 0.647                                                         |
| <b>F(000)</b>                          | 1764.0                                                        |
| <b>Crystal size/mm<sup>3</sup></b>     | 0.27 × 0.15 × 0.12                                            |
| <b>Radiation</b>                       | CuKα (λ = 1.54184)                                            |
| <b>2θ range for data collection/°</b>  | 7.19 to 134.132                                               |

---

|                                                   |                                          |
|---------------------------------------------------|------------------------------------------|
| <b>Index ranges</b>                               | -16 ≤ h ≤ 16, -16 ≤ k ≤ 15, -31 ≤ l ≤ 35 |
| <b>Reflections collected</b>                      | 56519                                    |
| <b>Independent reflections</b>                    | 11190 [Rint = 0.0423, Rsigma = 0.0281]   |
| <b>Data/restraints/parameters</b>                 | 11190/21/689                             |
| <b>Goodness-of-fit on F2</b>                      | 1.073                                    |
| <b>Final R indexes [I ≥ 2σ (I)]</b>               | R1 = 0.0670, wR2 = 0.1940                |
| <b>Final R indexes [all data]</b>                 | R1 = 0.0745, wR2 = 0.2057                |
| <b>Largest diff. peak/hole / e Å<sup>-3</sup></b> | 0.46/-0.26                               |
| <b>Flack parameter</b>                            | 0.22(11)                                 |

---

Single crystal of **3an'** was obtained by slow evaporation from CH<sub>3</sub>CH<sub>2</sub>OH at 25 °C. ORTEP diagram of compound **3an'**, the ellipsoid contour probability levels: 50%.

## 4 Procedures and characterization data

### 4.1 Typical procedures for the organocatalytic and enantioselective Diels–Alder reaction between hydroxymaleimides **1a** and in situ generated nitrosoalkenes from $\alpha$ -bromoketoxime **2a**

A solution of hydroxymaleimide **1a** (21.7 mg, 0.1 mmol, 1.0 equiv.),  $\alpha$ -bromoketoxime **2a** (26.0 mg, 0.12 mmol, 1.2 equiv.), and Cat **4b** (3 mg, 5 mol%), Na<sub>2</sub>CO<sub>3</sub> (6.4 mg, 0.6 eq) in DCM (2 mL, 0.1 M) was stirred at 25 °C. After **1a** was consumed by TLC (24 h, R<sub>f</sub> = 0.3, V(PE: EA) = 5:1), the solvent was evaporated and the mixture was directly purified by flash column chromatography petroleum ether/ethyl acetate (V(PE/EA) = 10/1 to 5/1) to afford products **3aa** (33.0 mg). Other reactants were operated by the same procedures.

### 4.2 Scale-up preparation and representative transformation of product **3aa** and control experiments.

#### 4.2.1 Scale-up (Scheme S1 a).

**3aa**: A solution of hydroxymaleimide **1a** (1.1 g, 5.0 mmol, 1.0 equiv.),  $\alpha$ -bromoketoxime **2a** (1.28 g, 6 mmol, 1.2 equiv.), and Cat **4b** (0.15 g, 5 mol%), Na<sub>2</sub>CO<sub>3</sub> (0.32 g, 0.6 eq) in DCM (50 mL, 0.1 M) was stirred at 25 °C. After **1a** was consumed by TLC (24 h, R<sub>f</sub> = 0.3, V(PE: EA) = 5:1), the solvent was evaporated and the mixture was directly purified by flash column chromatography petroleum ether/ethyl acetate (V(PE/EA) = 10/1 to 5/1) to afford products **3aa** (1.6 g, 90% yield, 97 % ee).

#### 4.2.2 control experiments (Scheme S1 b-d)

Scheme S1 b:

A solution of product **3aa** (35 mg, 0.1 mmol, 1.0 equiv.),  $\alpha$ -bromoketoxime **2a** (26.0 mg, 0.12 mmol, 1.2 equiv.), and Na<sub>2</sub>CO<sub>3</sub> (6.4 mg, 0.6 mmol) in DCM (1 mL, 0.1 M) was stirred at 25 °C. The reaction was monitored by TLC, and no new product was detected

Scheme S1 c:

A solution of product **3aa** (35 mg, 0.1 mmol, 1 equiv.),  $\alpha$ -bromoketoxime **2m** (24.0 mg, 0.12 mmol, 1.2 equiv.), and Na<sub>2</sub>CO<sub>3</sub> (6.4 mg, 0.6 mmol) in DCM (1 mL, 0.1 M) was stirred at 25 °C. The reaction was monitored by TLC, and no new product was detected.

Scheme S1 d:

A solution of product **3am** (34 mg, 0.1 mmol, 1 equiv.),  $\alpha$ -bromoketoxime **2a** (26.0 mg, 0.12 mmol, 1.2 equiv.), and Na<sub>2</sub>CO<sub>3</sub> (6.4 mg, 0.6 mmol) in DCM (1 mL, 0.1 M) was stirred at 25 °C. After **3am** was consumed by TLC (24 h, R<sub>f</sub> = 0.2, V(PE: EA) = 5:1), the solvent was evaporated and the mixture was directly purified by column chromatography petroleum ether/ethyl acetate (V(PE/EA) = 5/1) to afford products **3ama** (45 mg, 95% yield, 87 % ee).

#### 4.2.3 Representative transformations (Scheme S1 e)

A solution of product **3aa** (105 mg, 0.3 mmol, 1.0 equiv.), Cerium Ammonium Nitrate (986 mg, 1.8 mmol, 6.0 equiv.) in 8 mL solvent (V(CH<sub>3</sub>CN:H<sub>2</sub>O) = 1:1) was stirred at 0 °C. After **3aa** was consumed by TLC (10 min, R<sub>f</sub> = 0.4, V(PE: EA) = 6:1). The reaction solution was extracted with DCM (8 mL × 3), concentrated under reduced pressure, and column chromatography to obtain the target product **5a**. (99.5 mg, 99% yield, 93% ee).

**Scheme S 1 Scaled-up preparation, control experiments and representative transformation of the product 3aa.**

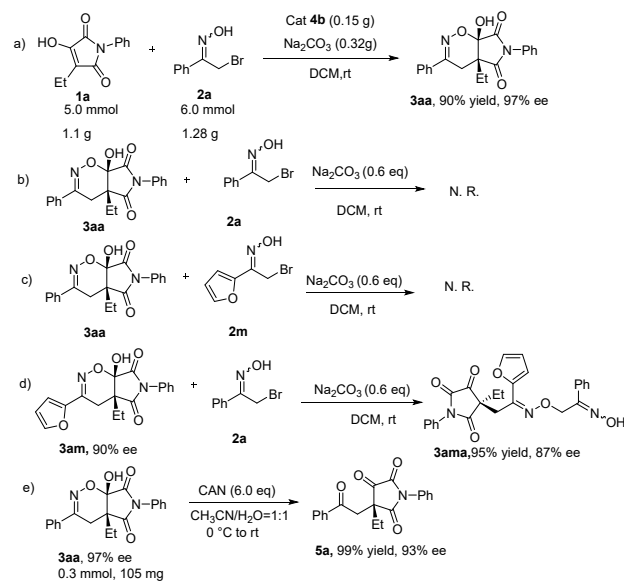

**4.3 Characterization data**

(**3aa**):

**(4aR,7aS)-4a-ethyl-7a-hydroxy-3,6-diphenyl-4a,7a-dihydropyrrolo[3,4-*e*][1,2]oxazine-5,7(4*H*,6*H*)-dione**

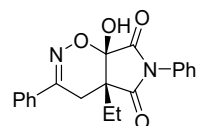

It was purified by flash chromatography [V(PE/EA)= 10/1 to 5/1] to afford white solid, 94% yield, 97% ee; mp = 176.1-176.9 °C;  $[\alpha]_{\text{D}}^{20} = +257.8$  (c 0.50, CH<sub>2</sub>Cl<sub>2</sub>); the ee was determined by HPLC (Chiralpak AD-H, n-hexane/isopropanol = 80/20, flow rate 1.0 mL/min,  $\lambda = 254$  nm,  $t_{\text{major}} = 15$  min,  $t_{\text{minor}} = 17$  min);

<sup>1</sup>H NMR (300 MHz, DMSO-*d*<sub>6</sub>)  $\delta$  8.85 (s, 1H), 7.86-7.70 (m, 2H), 7.57-7.43 (m, 6H), 7.30-7.18 (m, 2H), 3.17 (d,  $J = 16.5$  Hz, 1H), 2.83 (d,  $J = 16.5$  Hz, 1H), 2.07-1.78 (m, 2H), 0.98 (t,  $J = 7.3$  Hz, 3H).

<sup>13</sup>C NMR (75 MHz, DMSO-*d*<sub>6</sub>)  $\delta$  176.3, 171.8, 164.2, 133.2, 131.0, 130.9, 129.4, 129.1, 128.9, 126.6, 126.1, 96.7, 50.2, 27.4, 26.6, 9.2.

HRMS(ESI)  $m/z$ : [M+H]<sup>+</sup> calcd for C<sub>20</sub>H<sub>18</sub>N<sub>2</sub>O<sub>4</sub>H<sup>+</sup> 351.1339, found 351.1346.

(**3ba**):

**(4aR,7aS)-4a-ethyl-6-(2-fluorophenyl)-7a-hydroxy-3-phenyl-4a,7a-dihydropyrrolo[3,4-*e*][1,2]oxazine-5,7(4*H*,6*H*)-dione**



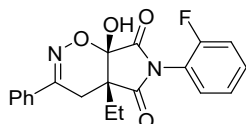

It was purified by flash chromatography [V(PE/EA)= 10/1 to 5/1] to afford white solid, 92% yield, 96% ee; mp = 182.7-183.5 °C;  $[\alpha]_D^{20} = +201.9$  (c 1.0, CH<sub>2</sub>Cl<sub>2</sub>); the ee was determined by HPLC (Chiralpak AD-H, n-hexane/isopropanol = 80/20, flow rate 1.0 mL/min,  $\lambda = 254$  nm,  $t_{\text{minor}} = 17$  min,  $t_{\text{major}} = 20$  min);

<sup>1</sup>H NMR (300 MHz, DMSO-*d*<sub>6</sub>)  $\delta$  8.96 (s, 1H), 7.80 (d,  $J = 7.1$  Hz, 2H), 7.61-7.28 (m, 7H), 3.18 (d,  $J = 16.4$  Hz, 1H), 2.85 (d,  $J = 16.4$  Hz, 1H), 2.07-1.75 (m, 2H), 1.00 (t,  $J = 7.3$  Hz, 3H).

<sup>13</sup>C NMR (75 MHz, DMSO-*d*<sub>6</sub>)  $\delta$  175.6, 171.3, 164.6, 156.7 (d,  $J = 251.0$  Hz), 133.2, 131.9 (d,  $J = 8.0$  Hz), 130.9, 129.6, 128.9, 126.1, 125.4, 118.6 (d,  $J = 13.6$  Hz), 116.7 (d,  $J = 19.1$  Hz), 97.0, 50.9, 27.3, 26.8, 9.1.

HRMS(ESI) *m/z*: [M+H]<sup>+</sup> calcd for C<sub>20</sub>H<sub>17</sub>FN<sub>2</sub>O<sub>4</sub>H<sup>+</sup> 369.1245, found 369.1250.

(3ca):

**(4a*R*,7a*S*)-6-(2,6-dimethylphenyl)-4a-ethyl-7a-hydroxy-3-phenyl-4a,7a-dihydropyrrolo[3,4-*e*][1,2]oxazine-5,7(4*H*,6*H*)-dione**

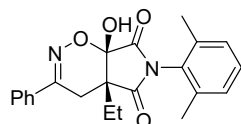

It was purified by flash chromatography [V(PE/EA) = 10/1 to 5/1] to afford white solid, 99% yield, 96% ee; mp = 198.8-200.1 °C;  $[\alpha]_D^{20} = +166.1$  (c 1.0, CH<sub>2</sub>Cl<sub>2</sub>); the ee was determined by HPLC (Chiralpak AD-H, n-hexane/isopropanol = 80/20, flow rate 1.0 mL/min,  $\lambda = 254$  nm,  $t_{\text{major}} = 24$  min,  $t_{\text{minor}} = 28$  min);

<sup>1</sup>H NMR (300 MHz, DMSO-*d*<sub>6</sub>)  $\delta$  8.94 (s, 1H), 7.91-7.73 (m, 2H), 7.60-7.43 (m, 3H), 7.33-7.08 (m, 3H), 3.22 (d,  $J = 16.2$  Hz, 1H), 2.82 (d,  $J = 16.3$  Hz, 1H), 2.05 (s, 3H), 2.02-1.85 (m, 2H), 1.81 (s, 3H), 1.06 (t,  $J = 7.3$  Hz, 3H).

<sup>13</sup>C NMR (75 MHz, DMSO-*d*<sub>6</sub>)  $\delta$  176.0, 171.8, 165.1, 135.7, 135.4, 132.9, 131.0, 129.5, 128.8, 128.5, 128.5, 126.1, 97.7, 50.9, 27.0, 26.5, 17.4, 17.1, 9.3.

HRMS(ESI) *m/z*: [M+H]<sup>+</sup> calcd for C<sub>22</sub>H<sub>22</sub>N<sub>2</sub>O<sub>4</sub>H<sup>+</sup> 379.1652, found 379.1660

(3da):

**(4a*R*,7a*S*)-4a-ethyl-7a-hydroxy-3-phenyl-6-(*o*-tolyl)-4a,7a-dihydropyrrolo[3,4-*e*][1,2]oxazine-5,7(4*H*,6*H*)-dione**

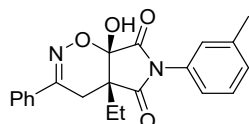

It was purified by flash chromatography [V(PE/EA) = 10/1 to 5/1] to afford white solid, 96% yield, 99% ee; mp = 154.6-155.2 °C;  $[\alpha]_D^{20} = +186.7$  (c 1.0, CH<sub>2</sub>Cl<sub>2</sub>); the ee was determined by HPLC (Chiralpak AD-H, n-hexane/isopropanol = 80/20, flow rate 1.0 mL/min,  $\lambda = 254$  nm,  $t_{\text{minor}} = 25$  min,  $t_{\text{major}} = 27$  min);

**<sup>1</sup>H NMR** (300 MHz, DMSO-*d*<sub>6</sub>) δ 8.84 (s, 1H), 7.89-7.67 (m, 2H), 7.57-7.34 (m, 4H), 7.28 (d, *J* = 7.6 Hz, 1H), 7.02 (d, *J* = 9.9 Hz, 1H), 3.16 (d, *J* = 16.5 Hz, 1H), 2.82 (d, *J* = 16.5 Hz, 1H), 2.33 (s, 3H), 2.03-1.79 (m, 2H), 0.99 (t, *J* = 7.3 Hz, 3H).

**<sup>13</sup>C NMR** (75 MHz, DMSO-*d*<sub>6</sub>) δ 176.1, 171.6, 163.8, 138.8, 133.0, 130.7, 130.6, 129.5, 128.9, 128.6, 126.7, 125.8, 123.4, 96.4, 49.9, 27.2, 26.3, 20.4, 9.0.

**HRMS(ESI)** *m/z*: [M+H]<sup>+</sup> calcd for C<sub>21</sub>H<sub>20</sub>N<sub>2</sub>O<sub>4</sub>H<sup>+</sup> 365.1496, found 365.1531

(3ea):

**(4a*R*,7a*S*)-6-(3-chlorophenyl)-4a-ethyl-7a-hydroxy-3-phenyl-4a,7a-dihydropyrrolo[3,4-*e*][1,2]oxazine-5,7(4*H*,6*H*)-dione**

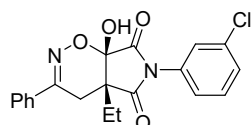

It was purified by flash chromatography [V(PE/EA) = 10/1 to 5/1] to afford white solid, 97% yield, 96% ee; mp = 165.8-166.7 °C; [α]<sub>D</sub><sup>20</sup> = +221.6 (c 1.0, CH<sub>2</sub>Cl<sub>2</sub>); the ee was determined by HPLC (Chiralpak IC, n-hexane/isopropanol = 80/20, flow rate 1.0 mL/min, λ = 254 nm, t<sub>minor</sub> = 5 min, t<sub>major</sub> = 6 min);

**<sup>1</sup>H NMR** (300 MHz, DMSO-*d*<sub>6</sub>) δ 8.87 (s, 1H), 7.93-7.70 (m, 2H), 7.63-7.39 (m, 6H), 7.33-7.22 (m, 1H), 3.16 (d, *J* = 16.6 Hz, 1H), 2.86 (d, *J* = 16.6 Hz, 1H), 2.03-1.75 (m, 2H), 0.97 (t, *J* = 7.3 Hz, 3H).

**<sup>13</sup>C NMR** (75 MHz, DMSO-*d*<sub>6</sub>) δ 176.3, 171.7, 164.4, 133.7, 133.5, 132.5, 131.3, 131.2, 129.4, 129.2, 126.9, 126.3, 125.8, 96.9, 50.4, 27.6, 26.6, 9.5.

**HRMS(ESI)** *m/z*: [M+H]<sup>+</sup> calcd for C<sub>20</sub>H<sub>17</sub>ClN<sub>2</sub>O<sub>4</sub>H<sup>+</sup> 385.0950, found 385.0951

(3fa):

**(4a*R*,7a*S*)-6-(3,5-dimethylphenyl)-4a-ethyl-7a-hydroxy-3-phenyl-4a,7a-dihydropyrrolo[3,4-*e*][1,2]oxazine-5,7(4*H*,6*H*)-dione**

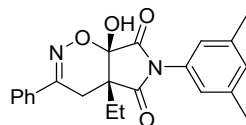

It was purified by flash chromatography [V(PE/EA) = 10/1 to 5/1] to afford white solid, 99% yield, 95% ee; mp = 177.5-179.1 °C; [α]<sub>D</sub><sup>20</sup> = +201.6 (c 1.0, CH<sub>2</sub>Cl<sub>2</sub>); the ee was determined by HPLC (Chiralpak AD-H, n-hexane/isopropanol = 80/20, flow rate 1.0 mL/min, λ = 254 nm, t<sub>major</sub> = 24 min, t<sub>minor</sub> = 25 min);

**<sup>1</sup>H NMR** (300 MHz, DMSO-*d*<sub>6</sub>) δ 8.82 (s, 1H), 7.80 (d, *J* = 5.7 Hz, 2H), 7.59-7.43 (m, 3H), 7.09 (s, 1H), 6.82 (s, 2H), 3.14 (d, *J* = 16.6 Hz, 1H), 2.81 (d, *J* = 16.6 Hz, 1H), 2.28 (s, 6H), 2.00-1.81 (m, 2H), 0.99 (t, *J* = 7.3 Hz, 3H).

**<sup>13</sup>C NMR** (75 MHz, DMSO-*d*<sub>6</sub>) δ 176.4, 171.9, 164.0, 138.8, 133.3, 131.0, 130.9, 130.5, 128.9, 126.1, 124.2, 96.7, 50.1, 27.5, 26.6, 20.6, 9.3.

**HRMS(ESI)** *m/z*: [M+H]<sup>+</sup> calcd for C<sub>22</sub>H<sub>22</sub>N<sub>2</sub>O<sub>4</sub>H<sup>+</sup> 379.1652, found 379.1661

(3ga):

**(4aR,7aS)-6-(3,5-difluorophenyl)-4a-ethyl-7a-hydroxy-3-phenyl-4a,7a-dihydropyrrolo[3,4-e][1,2]oxazine-5,7(4H,6H)-dione**

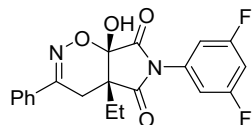

It was purified by flash chromatography [V(PE/EA) = 10/1 to 5/1] to afford white solid, 99% yield, 94% ee; mp = 150.7-151.9 °C;  $[\alpha]_D^{20} = +192.2$  (c 1.0, CH<sub>2</sub>Cl<sub>2</sub>); the ee was determined by HPLC (Chiralpak AD-H, n-hexane/isopropanol = 80/20, flow rate 1.0 mL/min,  $\lambda = 254$  nm,  $t_{\text{minor}} = 11$  min,  $t_{\text{major}} = 24$  min);

<sup>1</sup>H NMR (300 MHz, DMSO-*d*<sub>6</sub>)  $\delta$  8.86 (s, 1H), 7.89-7.73 (m, 2H), 7.56-7.39 (m, 4H), 7.27-7.11 (m, 2H), 3.14 (d,  $J = 16.6$  Hz, 1H), 2.87 (d,  $J = 16.7$  Hz, 1H), 1.99-1.78 (m, 2H), 0.95 (t,  $J = 7.3$  Hz, 3H).

<sup>13</sup>C NMR (75 MHz, DMSO-*d*<sub>6</sub>)  $\delta$  175.7, 171.0, 163.7, 162.2 (dd,  $J = 246.8, 14.5$  Hz), 133.2, 133.1 (d,  $J = 12.6$  Hz), 133.0 (d,  $J = 17.4$  Hz), 130.9, 128.9, 126.1, 110.7 (d,  $J = 27.8$  Hz), 110.7 (d,  $J = 9.3$  Hz), 105.3, 105.0, 104.6, 96.4, 50.0, 27.4, 26.1, 9.1.

HRMS(ESI) *m/z*: [M+H]<sup>+</sup> calcd for C<sub>20</sub>H<sub>16</sub>F<sub>2</sub>N<sub>2</sub>O<sub>4</sub>H<sup>+</sup> 387.1151, found 387.1160

**(3ha):**

**(4aR,7aS)-4a-ethyl-7a-hydroxy-3-phenyl-6-(p-tolyl)-4a,7a-dihydropyrrolo[3,4-e][1,2]oxazine-5,7(4H,6H)-dione**

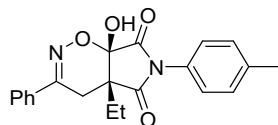

It was purified by flash chromatography [V(PE/EA) = 10/1 to 5/1] to afford white solid, 92% yield, 96% ee; mp = 163.7-165.6 °C;  $[\alpha]_D^{20} = +208.3$  (c 1.0, CH<sub>2</sub>Cl<sub>2</sub>); the ee was determined by HPLC (Chiralpak AD-H, n-hexane/isopropanol = 80/20, flow rate 1.0 mL/min,  $\lambda = 254$  nm,  $t_{\text{major}} = 14$  min,  $t_{\text{minor}} = 18$  min);

<sup>1</sup>H NMR (300 MHz, DMSO-*d*<sub>6</sub>)  $\delta$  8.81 (s, 1H), 7.86-7.73 (m, 2H), 7.57-7.42 (m, 3H), 7.32 (d,  $J = 8.1$  Hz, 2H), 7.10 (d,  $J = 8.3$  Hz, 2H), 3.15 (d,  $J = 16.5$  Hz, 1H), 2.82 (d,  $J = 16.5$  Hz, 1H), 2.34 (s, 3H), 2.01-1.78 (m, 2H), 0.97 (t,  $J = 7.3$  Hz, 3H).

<sup>13</sup>C NMR (75 MHz, DMSO-*d*<sub>6</sub>)  $\delta$  176.4, 171.9, 164.2, 138.7, 133.2, 130.9, 129.8, 128.9, 128.4, 126.4, 126.0, 96.7, 50.1, 27.4, 26.6, 20.7, 9.2.

HRMS(ESI) *m/z*: [M+H]<sup>+</sup> calcd for C<sub>21</sub>H<sub>20</sub>N<sub>2</sub>O<sub>4</sub>H<sup>+</sup> 365.1496, found 365.1505

**(3ia):**

**(4aR,7aS)-4a-ethyl-7a-hydroxy-6-(4-methoxyphenyl)-3-phenyl-4a,7a-dihydropyrrolo[3,4-e][1,2]oxazine-5,7(4H,6H)-dione**

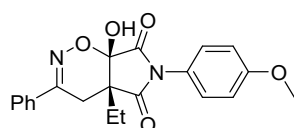

It was purified by flash chromatography [V(PE/EA) = 10/1 to 5/1] to afford white solid, 95% yield, 96% ee; mp = 142.7-143.8 °C;  $[\alpha]_D^{20} = +180.8$  (c 1.0, CH<sub>2</sub>Cl<sub>2</sub>); the ee was determined by HPLC (Chiralpak AD-H, n-hexane/isopropanol = 80/20, flow rate 1.0 mL/min,  $\lambda = 254$  nm,  $t_{\text{major}} = 19$  min,  $t_{\text{minor}} = 26$  min);

**<sup>1</sup>H NMR** (300 MHz, DMSO-*d*<sub>6</sub>)  $\delta$  8.79 (s, 1H), 7.84-7.73 (m, 2H), 7.53-7.44 (m, 3H), 7.17-7.10 (m, 2H), 7.08-7.02 (m, 2H), 3.78 (s, 3H), 3.14 (d,  $J = 16.4$  Hz, 1H), 2.81 (d,  $J = 16.5$  Hz, 1H), 1.99-1.82 (m, 2H), 0.97 (t,  $J = 7.3$  Hz, 3H).

**<sup>13</sup>C NMR** (75 MHz, DMSO-*d*<sub>6</sub>)  $\delta$  176.8, 172.3, 164.7, 159.7, 133.5, 131.1, 129.1, 128.2, 126.3, 123.8, 114.8, 97.0, 55.7, 50.4, 27.7, 27.0, 9.5.

**HRMS**(ESI) *m/z*: [M+H]<sup>+</sup> calcd for C<sub>21</sub>H<sub>20</sub>N<sub>2</sub>O<sub>3</sub>H<sup>+</sup> 381.1445, found 381.1451

**(3ja):**

**(4*aR*,7*aS*)-4*a*-ethyl-6-(4-fluorophenyl)-7*a*-hydroxy-3-phenyl-4*a*,7*a*-dihydropyrrolo[3,4-*e*][1,2]oxazine-5,7(4*H*,6*H*)-dione**

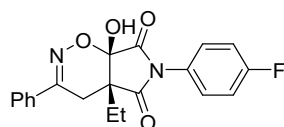

It was purified by flash chromatography [V(PE/EA) = 10/1 to 5/1] to afford white solid, 99% yield, 96% ee; mp = 169.8-170.1 °C;  $[\alpha]_D^{20} = +240.3$  (c 1.0, CH<sub>2</sub>Cl<sub>2</sub>); the ee was determined by HPLC (Chiralpak AD-H, n-hexane/isopropanol = 80/20, flow rate 1.0 mL/min,  $\lambda = 254$  nm,  $t_{\text{major}} = 14$  min,  $t_{\text{minor}} = 17$  min);

**<sup>1</sup>H NMR** (300 MHz, DMSO-*d*<sub>6</sub>)  $\delta$  8.85 (s, 1H), 7.88-7.71 (m, 2H), 7.55-7.45 (m, 3H), 7.41-7.28 (m, 4H), 3.16 (d,  $J = 16.5$  Hz, 1H), 2.84 (d,  $J = 16.5$  Hz, 1H), 2.02-1.76 (m, 2H), 0.97 (t,  $J = 7.4$  Hz, 3H).

**<sup>13</sup>C NMR** (75 MHz, DMSO-*d*<sub>6</sub>)  $\delta$  176.3, 171.7, 164.3, 161.8 (d,  $J = 246.5$  Hz), 133.2, 130.9, 129.0, 128.9, 127.2 (d,  $J = 3.1$  Hz), 126.1, 116.4 (d,  $J = 23.1$  Hz), 96.7, 50.2, 27.4, 26.6, 9.2.

**HRMS**(ESI) *m/z*: [M+H]<sup>+</sup> calcd for C<sub>20</sub>H<sub>17</sub>FN<sub>2</sub>O<sub>4</sub>H<sup>+</sup> 369.1245, found 369.1250

**(3ka):**

**(4*aR*,7*aS*)-6-(4-chlorophenyl)-4*a*-ethyl-7*a*-hydroxy-3-phenyl-4*a*,7*a*-dihydropyrrolo[3,4-*e*][1,2]oxazine-5,7(4*H*,6*H*)-dione**

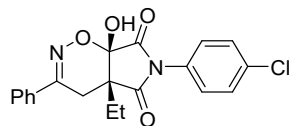

It was purified by flash chromatography [V(PE/EA) = 10/1 to 5/1] to afford white solid, 99% yield, 96% ee; mp = 158.7-159.9 °C;  $[\alpha]_D^{20} = +220.4$  (c 1.0, CH<sub>2</sub>Cl<sub>2</sub>); the ee was determined by HPLC (Chiralpak AD-H, n-hexane/isopropanol = 80/20, flow rate 1.0 mL/min,  $\lambda = 254$  nm,  $t_{\text{major}} = 15$  min,  $t_{\text{minor}} = 19$  min);

**<sup>1</sup>H NMR** (300 MHz, DMSO-*d*<sub>6</sub>)  $\delta$  8.87 (s, 1H), 7.79 (dd,  $J = 7.8, 1.9$  Hz, 2H), 7.63-7.56 (m, 2H), 7.53-7.42 (m, 3H), 7.35-7.26 (m, 2H), 3.16 (d,  $J = 16.6$  Hz, 1H), 2.83 (d,  $J = 16.6$  Hz, 1H), 2.00-1.75 (m, 2H), 0.96 (t,  $J = 7.4$  Hz, 3H).

**<sup>13</sup>C NMR** (75 MHz, DMSO-*d*<sub>6</sub>)  $\delta$  176.1, 171.5, 164.1, 133.6, 133.2, 130.9, 129.8, 129.5, 128.9, 128.4, 126.1, 96.7, 50.1, 27.4, 26.5, 9.2.

HRMS(ESI) m/z: [M+H]<sup>+</sup> calcd for C<sub>20</sub>H<sub>17</sub>ClN<sub>2</sub>O<sub>4</sub>H<sup>+</sup> 385.0950, found 385.0961

(3la):

**(4a*R*,7a*S*)-6-(4-bromophenyl)-4a-ethyl-7a-hydroxy-3-phenyl-4a,7a-dihydropyrrolo[3,4-*e*][1,2]oxazine-5,7(4*H*,6*H*)-dione**

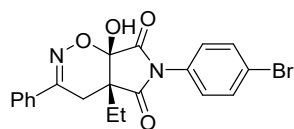

It was purified by flash chromatography [V(PE/EA) = 10/1 to 5/1] to afford white solid, 99% yield, 94% ee; mp = 169.7-170.7 °C; [α]<sub>D</sub><sup>20</sup> = +144.1 (c 1.0, CH<sub>2</sub>Cl<sub>2</sub>); the ee was determined by HPLC (Chiralpak AD-H, n-hexane/isopropanol = 80/20, flow rate 1.0 mL/min, λ = 254 nm, t<sub>major</sub> = 16 min, t<sub>minor</sub> = 21 min);

<sup>1</sup>H NMR (300 MHz, DMSO-*d*<sub>6</sub>) δ 8.86 (s, 1H), 7.82-7.68 (m, 4H), 7.55-7.42 (m, 3H), 7.29-7.19 (m, 2H), 3.16 (d, *J* = 16.6 Hz, 1H), 2.83 (d, *J* = 16.6 Hz, 1H), 2.04-1.77 (m, 2H), 0.96 (t, *J* = 7.3 Hz, 3H).

<sup>13</sup>C NMR (75 MHz, DMSO-*d*<sub>6</sub>) δ 176.1, 171.5, 164.1, 133.2, 132.4, 130.9, 130.2, 128.9, 128.7, 126.0, 122.1, 96.6, 50.1, 27.4, 26.4, 9.2.

HRMS(ESI) m/z: [M+H]<sup>+</sup> calcd for C<sub>20</sub>H<sub>17</sub>BrN<sub>2</sub>O<sub>4</sub>H<sup>+</sup> 429.0444, found 429.0447

(3ma):

**(4a*R*,7a*S*)-6-benzyl-4a-ethyl-7a-hydroxy-3-phenyl-4a,7a-dihydropyrrolo[3,4-*e*][1,2]oxazine-5,7(4*H*,6*H*)-dione**

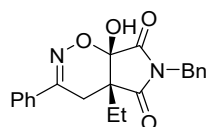

It was purified by flash chromatography [V(PE/EA) = 10/1 to 5/1] to afford white solid, 94% yield, 95% ee; mp = 164.7-166.5 °C; [α]<sub>D</sub><sup>20</sup> = +128.4 (c 1.0, CH<sub>2</sub>Cl<sub>2</sub>); the ee was determined by HPLC (Chiralpak AD-H, n-hexane/isopropanol = 80/20, flow rate 1.0 mL/min, λ = 254 nm, t<sub>minor</sub> = 20 min, t<sub>major</sub> = 25 min);

<sup>1</sup>H NMR (300 MHz, DMSO-*d*<sub>6</sub>) δ 8.73 (s, 1H), 7.69 (d, *J* = 6.5 Hz, 2H), 7.59-7.36 (m, 3H), 7.31-7.09 (m, 5H), 4.63 (s, 2H), 3.05 (d, *J* = 15.9 Hz, 1H), 2.74 (d, *J* = 16.0 Hz, 1H), 1.92-1.65 (m, 2H), 0.80 (t, *J* = 7.3 Hz, 3H).

<sup>13</sup>C NMR (75 MHz, DMSO-*d*<sub>6</sub>) δ 176.9, 172.4, 165.9, 135.3, 133.0, 130.9, 128.8, 128.5, 127.6, 127.3, 126.1, 97.4, 50.7, 41.5, 27.4, 26.7, 9.2

HRMS(ESI) m/z: [M+H]<sup>+</sup> calcd for C<sub>21</sub>H<sub>20</sub>N<sub>2</sub>O<sub>4</sub>H<sup>+</sup> 365.1496, found 365.1503

(3na):

**(4a*R*,7a*S*)-7a-hydroxy-4a-methyl-3,6-diphenyl-4a,7a-dihydropyrrolo[3,4-*e*][1,2]oxazine-5,7(4*H*,6*H*)-dione**

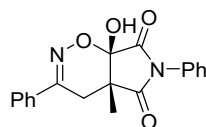

It was purified by flash chromatography [V(PE/EA) = 10/1 to 5/1] to afford white solid, 99% yield, 98% ee; mp = 190.2-192.1 °C;  $[\alpha]_D^{20} = +150.3$  (c 1.0, CH<sub>2</sub>Cl<sub>2</sub>); the ee was determined by HPLC (Chiralpak IC, n-hexane/isopropanol = 80/20, flow rate 1.0 mL/min,  $\lambda = 254$  nm,  $t_{\text{minor}} = 21$  min,  $t_{\text{major}} = 24$  min);

**<sup>1</sup>H NMR** (300 MHz, DMSO-*d*<sub>6</sub>)  $\delta$  8.72 (s, 1H), 7.88-7.73 (m, 2H), 7.57-7.42 (m, 6H), 7.29-7.21 (m, 2H), 3.13 (d,  $J = 15.7$  Hz, 1H), 2.91 (d,  $J = 15.7$  Hz, 1H), 1.39 (s, 3H).

**<sup>13</sup>C NMR** (75 MHz, DMSO-*d*<sub>6</sub>)  $\delta$  177.1, 171.4, 166.6, 133.1, 131.1, 131.1, 129.2, 129.0, 128.9, 126.9, 126.2, 97.3, 47.2, 29.2, 18.4.

**HRMS**(ESI) *m/z*: [M+H]<sup>+</sup> calcd for C<sub>19</sub>H<sub>16</sub>N<sub>2</sub>O<sub>4</sub>H<sup>+</sup> 337.1183, found 337.1191

**(3oa):**

**(4a*R*,7a*S*)-7a-hydroxy-3,6-diphenyl-4a-propyl-4a,7a-dihydropyrrolo[3,4-*e*][1,2]oxazine-5,7(4*H*,6*H*)-dione**

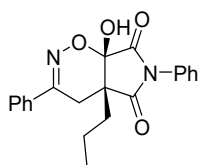

It was purified by flash chromatography [V(PE/EA) = 10/1 to 5/1] to afford white solid, 94% yield, 96% ee; mp = 183.3-184.8 °C;  $[\alpha]_D^{20} = +170.4$  (c 1.0, CH<sub>2</sub>Cl<sub>2</sub>); the ee was determined by HPLC (Chiralpak AD-H, n-hexane/isopropanol = 80/20, flow rate 1.0 mL/min,  $\lambda = 254$  nm,  $t_{\text{major}} = 14$  min,  $t_{\text{minor}} = 16$  min);

**<sup>1</sup>H NMR** (300 MHz, DMSO-*d*<sub>6</sub>)  $\delta$  8.84 (s, 1H), 7.91-7.69 (m, 2H), 7.57-7.38 (m, 6H), 7.31-7.10 (m, 2H), 3.16 (d,  $J = 16.5$  Hz, 1H), 2.84 (d,  $J = 16.4$  Hz, 1H), 1.94-1.69 (m, 2H), 1.56-1.23 (m, 2H), 0.89 (t,  $J = 7.2$  Hz, 3H).

**<sup>13</sup>C NMR** (75 MHz, DMSO-*d*<sub>6</sub>)  $\delta$  176.4, 171.8, 164.4, 133.2, 131.0, 130.9, 129.4, 129.1, 128.9, 126.6, 126.0, 96.8, 50.0, 36.4, 26.9, 17.8, 14.3.

**HRMS**(ESI) *m/z*: [M+H]<sup>+</sup> calcd for C<sub>21</sub>H<sub>20</sub>N<sub>2</sub>O<sub>4</sub>H<sup>+</sup> 365.1496, found 365.1506.

**(3pa):**

**(4a*R*,7a*S*)-4a-hexyl-7a-hydroxy-3,6-diphenyl-4a,7a-dihydropyrrolo[3,4-*e*][1,2]oxazine-5,7(4*H*,6*H*)-dione**

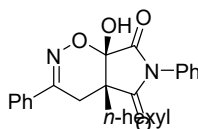

It was purified by flash chromatography [V(PE/EA) = 10/1 to 5/1] to afford white solid, 86% yield, 95% ee; mp = 132.7-133.7 °C;  $[\alpha]_D^{20} = +173.5$  (c 1.0, CH<sub>2</sub>Cl<sub>2</sub>); the ee was determined by HPLC (Chiralpak AD-H, n-hexane/isopropanol = 80/20, flow rate 1.0 mL/min,  $\lambda = 254$  nm,  $t_{\text{major}} = 10$  min,  $t_{\text{minor}} = 11$  min);

**<sup>1</sup>H NMR** (300 MHz, DMSO-*d*<sub>6</sub>)  $\delta$  8.85 (s, 1H), 7.80 (d,  $J = 5.5$  Hz, 2H), 7.56-7.41 (m, 6H), 7.22 (d,  $J = 6.8$  Hz, 2H), 3.17 (d,  $J = 16.5$  Hz, 1H), 2.84 (d,  $J = 16.5$  Hz, 1H), 1.96-1.72 (m, 2H), 1.50-1.17 (m, 8H), 0.89-0.76 (m, 3H).

**<sup>13</sup>C NMR** (75 MHz, DMSO-*d*<sub>6</sub>)  $\delta$  176.4, 171.8, 164.4, 133.2, 131.0, 130.9, 129.4, 129.0, 128.9, 126.5, 126.1, 96.8, 49.9, 34.3, 30.9, 29.0, 27.0, 24.1, 22.0, 13.9.  $[\alpha]_D^{20}$

**HRMS**(ESI) *m/z*: [M+H]<sup>+</sup> calcd for C<sub>24</sub>H<sub>26</sub>N<sub>2</sub>O<sub>4</sub>H<sup>+</sup> 407.1965, found 407.1973.

**(3qa):**

**(4aR,7aS)-4a-benzyl-7a-hydroxy-3,6-diphenyl-4a,7a-dihydropyrrolo[3,4-*e*][1,2]oxazine-5,7(4*H*,6*H*)-dione**

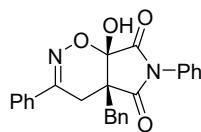

It was purified by flash chromatography [V(PE/EA) = 10/1 to 5/1] to afford white solid, 97% yield, 95% ee; mp = 169.7-170.7 °C;  $[\alpha]_D^{20} = +335.0$  (c 1.0, CH<sub>2</sub>Cl<sub>2</sub>); the ee was determined by HPLC (Chiralpak AD-H, n-hexane/isopropanol = 80/20, flow rate 1.0 mL/min,  $\lambda = 254$  nm,  $t_{\text{major}} = 16$  min,  $t_{\text{minor}} = 19$  min);

**<sup>1</sup>H NMR** (300 MHz, DMSO-*d*<sub>6</sub>)  $\delta$  9.25 (s, 1H), 7.92-7.72 (m, 2H), 7.54-7.46 (m, 3H), 7.42-7.35 (m, 3H), 7.29 (s, 5H), 6.72-6.56 (m, 2H), 3.42 (d,  $J = 14.2$  Hz, 3H), 3.30 (d,  $J = 17.5$  Hz, 1H), 3.10 (d,  $J = 13.5$  Hz, 1H), 2.94 (d,  $J = 17.5$  Hz, 1H).

**<sup>13</sup>C NMR** (75 MHz, DMSO-*d*<sub>6</sub>)  $\delta$  175.1, 171.1, 161.1, 135.0, 133.5, 130.7, 130.6, 130.5, 129.1, 128.9, 128.8, 128.4, 127.4, 126.3, 125.9, 95.7, 50.8, 25.7.

**HRMS(ESI)**  $m/z$ : [M+H]<sup>+</sup> calcd for C<sub>25</sub>H<sub>20</sub>N<sub>2</sub>O<sub>4</sub>H<sup>+</sup> 413.1496, found 413.1504.

**(3ra):**

**(4aS,7aS)-7a-hydroxy-3,4a,6-triphenyl-4a,7a-dihydropyrrolo[3,4-*e*][1,2]oxazine-5,7(4*H*,6*H*)-dione**

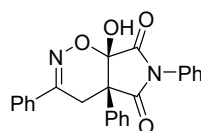

It was purified by flash chromatography [V(PE/EA) = 5/1] to afford white solid, 98% yield, 84% ee; mp = 118.2-120.1 °C;  $[\alpha]_D^{20} = +74.5$  (c 1.0, CH<sub>2</sub>Cl<sub>2</sub>); the ee was determined by HPLC (Chiralpak IC, n-hexane/isopropanol = 80/20, flow rate 1.0 mL/min,  $\lambda = 254$  nm,  $t_{\text{minor}} = 9$  min,  $t_{\text{major}} = 13$  min);

**<sup>1</sup>H NMR** (300 MHz, DMSO-*d*<sub>6</sub>)  $\delta$  8.95 (s, 1H), 7.94-7.85 (m, 2H), 7.58-7.39 (m, 11H), 7.28 (d,  $J = 6.8$  Hz, 2H), 3.70-3.51 (m, 2H).

**<sup>13</sup>C NMR** (75 MHz, DMSO-*d*<sub>6</sub>)  $\delta$  175.5, 171.9, 167.7, 135.4, 132.7, 131.3, 131.0, 129.5, 129.3, 129.1, 128.5, 128.1, 127.7, 126.7, 126.3, 98.4, 56.7, 28.0.

**HRMS(ESI)**  $m/z$ : [M+H]<sup>+</sup> calcd for C<sub>24</sub>H<sub>18</sub>N<sub>2</sub>O<sub>4</sub>H<sup>+</sup> 399.1339, found 399.1345.

**(3sa):**

**(4aS,7aS)-4a-(tert-butoxy)-7a-hydroxy-3,6-diphenyl-4a,7a-dihydropyrrolo[3,4-*e*][1,2]oxazine-5,7(4*H*,6*H*)-dione**

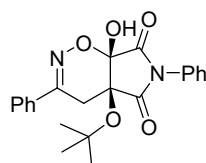

White solid, 91% yield, >99% ee; mp = 128.7-129.9 °C;  $[\alpha]_D^{20} = +234.8$  (c 1.0, CH<sub>2</sub>Cl<sub>2</sub>); the ee was determined by HPLC (Chiralpak AD-H, n-hexane/isopropanol = 80/20, flow rate 1.0 mL/min,  $\lambda = 254$  nm,  $t_{\text{minor}} = 15$  min,  $t_{\text{major}} = 20$  min); eluent: v(petroleum ether/ethyl acetate) = 10/1 to 5/1

**<sup>1</sup>H NMR** (300 MHz, DMSO-*d*<sub>6</sub>) δ 8.72 (s, 1H), 7.82 (d, *J* = 5.9 Hz, 2H), 7.62-7.47 (m, 6H), 7.30 (d, *J* = 7.6 Hz, 2H), 3.51 (d, *J* = 17.4 Hz, 1H), 3.14 (d, *J* = 17.4 Hz, 1H), 1.33 (s, 9H).

**<sup>13</sup>C NMR** (75 MHz, DMSO-*d*<sub>6</sub>) δ 174.0, 170.8, 160.2, 133.1, 131.0, 130.8, 129.5, 129.1, 128.8, 126.1, 94.6, 78.8, 75.8, 29.5, 29.1.

**HRMS**(ESI) *m/z*: [M+H]<sup>+</sup> calcd for C<sub>22</sub>H<sub>22</sub>N<sub>2</sub>O<sub>5</sub>H<sup>+</sup> 395.1602, found 395.1601.

**(3ab):**

**(4a*R*,7a*S*)-4a-ethyl-7a-hydroxy-6-phenyl-3-(*p*-tolyl)-4a,7a-dihydropyrrolo[3,4-*e*][1,2]oxazine-5,7(4*H*,6*H*)-dione**

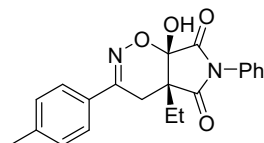

It was purified by flash chromatography [V(PE/EA) = 10/1 to 5/1] to afford white solid, 83% yield, 97% ee; mp = 184.3-185.2 °C; [α]<sub>D</sub><sup>20</sup> = +229.5 (c 1.0, CH<sub>2</sub>Cl<sub>2</sub>); the ee was determined by HPLC (Chiralpak AD-H, n-hexane/isopropanol = 80/20, flow rate 1.0 mL/min, λ = 254 nm, *t*<sub>major</sub> = 18 min, *t*<sub>minor</sub> = 20 min);

**<sup>1</sup>H NMR** (300 MHz, DMSO-*d*<sub>6</sub>) δ 8.79 (s, 1H), 7.69 (d, *J* = 8.0 Hz, 2H), 7.56-7.42 (m, 3H), 7.33-7.19 (m, 4H), 3.13 (d, *J* = 16.4 Hz, 1H), 2.80 (d, *J* = 16.4 Hz, 1H), 2.34 (s, 3H), 2.02-1.77 (m, 2H), 0.98 (t, *J* = 7.3 Hz, 3H).

**<sup>13</sup>C NMR** (75 MHz, DMSO-*d*<sub>6</sub>) δ 176.3, 171.8, 164.5, 140.8, 131.0, 130.4, 129.4, 129.3, 129.0, 126.6, 126.0, 96.8, 50.3, 27.2, 26.7, 20.9, 9.2.

**HRMS**(ESI) *m/z*: [M+H]<sup>+</sup> calcd for C<sub>21</sub>H<sub>20</sub>N<sub>2</sub>O<sub>4</sub>H<sup>+</sup> 365.1496, found 365.1503.

**(3ac):**

**(4a*R*,7a*S*)-4a-ethyl-7a-hydroxy-3-(4-methoxyphenyl)-6-phenyl-4a,7a-dihydropyrrolo[3,4-*e*][1,2]oxazine-5,7(4*H*,6*H*)-dione**

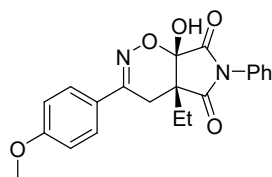

It was purified by flash chromatography [V(PE/EA) = 10/1 to 5/1] to afford white solid, 87% yield, 96% ee; mp = 161.9-163.7 °C; [α]<sub>D</sub><sup>20</sup> = +264.1 (c 1.0, CH<sub>2</sub>Cl<sub>2</sub>); the ee was determined by HPLC (Chiralpak IC, n-hexane/isopropanol = 90/10, flow rate 1.0 mL/min, λ = 254 nm, *t*<sub>minor</sub> = 11 min, *t*<sub>major</sub> = 15 min);

**<sup>1</sup>H NMR** (300 MHz, DMSO-*d*<sub>6</sub>) δ 8.75 (s, 1H), 7.76 (d, *J* = 8.9 Hz, 2H), 7.59-7.34 (m, 3H), 7.21 (d, *J* = 6.8 Hz, 2H), 7.03 (d, *J* = 8.9 Hz, 2H), 3.80 (s, 3H), 3.12 (d, *J* = 16.1 Hz, 1H), 2.80 (d, *J* = 16.1 Hz, 1H), 2.04-1.74 (m, 2H), 0.98 (t, *J* = 7.3 Hz, 3H).

**<sup>13</sup>C NMR** (75 MHz, DMSO-*d*<sub>6</sub>) δ 176.4, 171.9, 164.5, 161.4, 131.0, 129.3, 129.0, 127.7, 126.6, 125.3, 114.2, 96.8, 55.3, 50.4, 27.1, 26.9, 9.3.

**HRMS**(ESI) *m/z*: [M+H]<sup>+</sup> calcd for C<sub>21</sub>H<sub>20</sub>N<sub>2</sub>O<sub>5</sub>H<sup>+</sup> 381.1445, found 381.1454.



(3ad):

(4a*R*,7a*S*)-4a-ethyl-3-(4-fluorophenyl)-7a-hydroxy-6-phenyl-4a,7a-dihydropyrrolo[3,4-*e*][1,2]oxazine-5,7(4*H*,6*H*)-dione

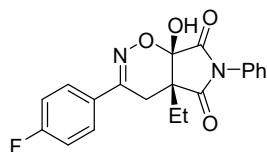

It was purified by flash chromatography [V(PE/EA) = 10/1 to 5/1] to afford white solid, 87% yield, 95% ee; mp = 181.2-182.3 °C;  $[\alpha]_D^{20} = +210.9$  (c 1.0, CH<sub>2</sub>Cl<sub>2</sub>); the ee was determined by HPLC (Chiralpak AD-H, n-hexane/isopropanol = 90/10, flow rate 1.0 mL/min,  $\lambda = 254$  nm,  $t_{\text{major}} = 17$  min,  $t_{\text{minor}} = 18$  min);

<sup>1</sup>H NMR (300 MHz, DMSO-*d*<sub>6</sub>)  $\delta$  8.86 (s, 1H), 7.96-7.75 (m, 2H), 7.61-7.40 (m, 3H), 7.39-7.11 (m, 4H), 3.16 (d,  $J = 16.7$  Hz, 1H), 2.83 (d,  $J = 16.7$  Hz, 1H), 2.00-1.80 (m, 2H), 0.98 (t,  $J = 7.3$  Hz, 3H).

<sup>13</sup>C NMR (75 MHz, DMSO-*d*<sub>6</sub>)  $\delta$  176.3, 171.7, 163.7 (d,  $J = 248.5$  Hz), 163.1, 131.0, 129.8 (d,  $J = 2.7$  Hz), 129.4, 129.1, 128.5 (d,  $J = 8.7$  Hz), 126.6, 115.9 (d,  $J = 21.9$  Hz), 96.6, 50.1, 27.5, 26.4, 9.2.

HRMS(ESI) *m/z*: [M+H]<sup>+</sup> calcd for C<sub>20</sub>H<sub>17</sub>FN<sub>2</sub>O<sub>4</sub>H<sup>+</sup> 369.1245, found 369.1258.

(3ae):

(4a*R*,7a*S*)-3-(4-chlorophenyl)-4a-ethyl-7a-hydroxy-6-phenyl-4a,7a-dihydropyrrolo[3,4-*e*][1,2]oxazine-5,7(4*H*,6*H*)-dione

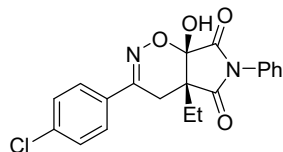

It was purified by flash chromatography [V(PE/EA) = 10/1 to 5/1] to afford white solid, 95% yield, 95% ee; mp = 135.8-137.6 °C;  $[\alpha]_D^{20} = +215.8$  (c 1.0, CH<sub>2</sub>Cl<sub>2</sub>); the ee was determined by HPLC (Chiralpak AD-H, n-hexane/isopropanol = 80/20, flow rate 1.0 mL/min,  $\lambda = 254$  nm,  $t_{\text{major}} = 19$  min,  $t_{\text{minor}} = 21$  min);

<sup>1</sup>H NMR (300 MHz, DMSO-*d*<sub>6</sub>)  $\delta$  8.90 (s, 1H), 8.00-7.72 (m, 2H), 7.61-7.42 (m, 5H), 7.24 (d,  $J = 6.7$  Hz, 2H), 3.17 (d,  $J = 16.8$  Hz, 1H), 2.82 (d,  $J = 16.9$  Hz, 1H), 2.08-1.72 (m, 2H), 0.98 (t,  $J = 7.2$  Hz, 3H).

<sup>13</sup>C NMR (75 MHz, DMSO-*d*<sub>6</sub>)  $\delta$  176.2, 171.7, 162.8, 135.7, 132.1, 131.0, 129.4, 129.1, 128.9, 127.9, 126.6, 96.6, 49.9, 27.7, 26.1, 9.1.

HRMS(ESI) *m/z*: [M+H]<sup>+</sup> calcd for C<sub>20</sub>H<sub>17</sub>ClN<sub>2</sub>O<sub>4</sub>H<sup>+</sup> 385.0950, 387.0928, found 385.0957, 387.0936.

(3af):

(4a*R*,7a*S*)-3-(4-bromophenyl)-4a-ethyl-7a-hydroxy-6-phenyl-4a,7a-dihydropyrrolo[3,4-*e*][1,2]oxazine-5,7(4*H*,6*H*)-dione

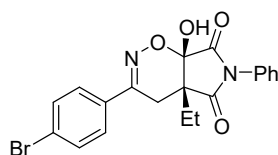

It was purified by flash chromatography [V(PE/EA) = 10/1 to 5/1] to afford white solid, 89% yield, 95% ee; mp = 144.8-145.9 °C;  $[\alpha]_D^{20} = +208.9$  (c 1.0, CH<sub>2</sub>Cl<sub>2</sub>); the ee was determined by HPLC (Chiralpak AD-H, n-hexane/isopropanol = 80/20, flow rate 1.0 mL/min,  $\lambda = 254$  nm,  $t_{\text{major}} = 20$  min,  $t_{\text{minor}} = 22$  min);

**<sup>1</sup>H NMR** (300 MHz, DMSO-*d*<sub>6</sub>)  $\delta$  8.88 (s, 1H), 7.85-7.64 (m, 4H), 7.57-7.43 (m, 3H), 7.27-7.16 (m, 2H), 3.16 (d,  $J = 16.8$  Hz, 1H), 2.82 (d,  $J = 16.8$  Hz, 1H), 2.05-1.75 (m, 2H), 0.98 (t,  $J = 7.3$  Hz, 3H).

**<sup>13</sup>C NMR** (75 MHz, DMSO-*d*<sub>6</sub>)  $\delta$  176.2, 171.6, 162.9, 132.4, 131.8, 130.9, 129.3, 129.0, 128.0, 126.6, 124.5, 96.6, 49.9, 27.6, 26.0, 9.1.

**HRMS**(ESI) *m/z*: [M+H]<sup>+</sup> calcd for C<sub>20</sub>H<sub>17</sub>BrN<sub>2</sub>O<sub>4</sub>H<sup>+</sup> 429.0444; 431.0427, found 429.0453, 431.0435.

**(3ag):**

**(4*aR*,7*aS*)-4*a*-ethyl-7*a*-hydroxy-6-phenyl-3-(4-(trifluoromethyl)phenyl)-4*a*,7*a*-dihydropyrrolo[3,4-*e*][1,2]oxazine-5,7(4*H*,6*H*)-dione**

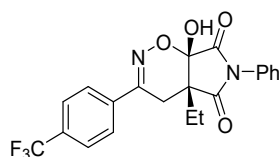

It was purified by flash chromatography [V(PE/EA) = 10/1 to 5/1] to afford white solid, 91% yield, 95% ee; mp = 173.1-174.4 °C;  $[\alpha]_D^{20} = +205.5$  (c 1.0, CH<sub>2</sub>Cl<sub>2</sub>); the ee was determined by HPLC (Chiralpak AD-H, n-hexane/isopropanol = 80/20, flow rate 1.0 mL/min,  $\lambda = 254$  nm,  $t_{\text{minor}} = 16$  min,  $t_{\text{major}} = 17$  min);

**<sup>1</sup>H NMR** (300 MHz, DMSO-*d*<sub>6</sub>)  $\delta$  8.97 (s, 1H), 8.03 (d,  $J = 8.2$  Hz, 2H), 7.85 (d,  $J = 8.2$  Hz, 2H), 7.61-7.44 (m, 3H), 7.31-7.21 (m, 2H), 3.23 (d,  $J = 17.0$  Hz, 1H), 2.87 (d,  $J = 17.1$  Hz, 1H), 2.04-1.83 (m, 2H), 0.98 (t,  $J = 7.3$  Hz, 3H).

**<sup>13</sup>C NMR** (151 MHz, DMSO-*d*<sub>6</sub>)  $\delta$  176.2, 171.6, 162.2, 137.2, 131.0, 130.7 (q,  $J = 32.6, 32.1$  Hz), 129.4, 129.2, 129.1, 127.3, 127.0, 126.6, 125.8 (q,  $J = 3.5$  Hz), 124.0 (d,  $J = 272.4$  Hz), 96.6, 49.7, 27.9, 25.8, 9.1.

**HRMS**(ESI) *m/z*: [M+H]<sup>+</sup> calcd for C<sub>21</sub>H<sub>17</sub>F<sub>3</sub>N<sub>2</sub>O<sub>4</sub>H<sup>+</sup> 419.1213, found 419.1223.

**(3ah):**

**(4*aR*,7*aS*)-4*a*-ethyl-7*a*-hydroxy-3-(4-nitrophenyl)-6-phenyl-4*a*,7*a*-dihydropyrrolo[3,4-*e*][1,2]oxazine-5,7(4*H*,6*H*)-dione**

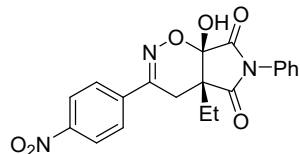

It was purified by flash chromatography [V(PE/EA) = 10/1 to 5/1] to afford white solid, 86% yield, 93% ee; mp = 184.8-186.8 °C;  $[\alpha]_D^{20} = +215.1$  (c 1.0, CH<sub>2</sub>Cl<sub>2</sub>); the ee was determined by HPLC (Chiralpak IC, n-hexane/isopropanol = 50/50, flow rate 1.0 mL/min,  $\lambda = 254$  nm,  $t_{\text{minor}} = 8$  min,  $t_{\text{major}} = 9$  min);

**<sup>1</sup>H NMR** (300 MHz, DMSO-*d*<sub>6</sub>)  $\delta$  9.05 (s, 1H), 8.31 (d,  $J = 8.5$  Hz, 2H), 8.08 (d,  $J = 8.5$  Hz, 2H), 7.57-7.43 (m, 3H), 7.27 (d,  $J = 7.0$  Hz, 2H), 3.26 (d,  $J = 17.3$  Hz, 1H), 2.89 (d,  $J = 17.3$  Hz, 1H), 2.07-1.76 (m, 2H), 0.98 (t,  $J = 7.3$  Hz, 3H).

**<sup>13</sup>C NMR** (75 MHz, DMSO-*d*<sub>6</sub>)  $\delta$  176.0, 171.4, 161.3, 148.7, 139.3, 130.9, 129.4, 129.1, 127.4, 126.6, 123.9, 96.6, 49.5, 28.1, 25.5, 9.0.

HRMS(ESI) m/z: [M+H]<sup>+</sup> calcd for C<sub>20</sub>H<sub>17</sub>N<sub>3</sub>O<sub>6</sub>H<sup>+</sup> 396.1190, found 396.1197.

(3ai):

(4a*R*,7a*S*)-4a-ethyl-7a-hydroxy-3-(3-methoxyphenyl)-6-phenyl-4a,7a-dihydropyrrolo[3,4-*e*][1,2]oxazine-5,7(4*H*,6*H*)-dione

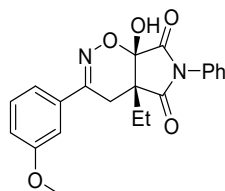

It was purified by flash chromatography [V(PE/EA) = 10/1 to 5/1] to afford white solid, 97% yield, 95% ee; mp = 159.2-160.6 °C; [α]<sub>D</sub><sup>20</sup> = +126.6 (c 1.0, CH<sub>2</sub>Cl<sub>2</sub>); the ee was determined by HPLC (Chiralpak AD-H, n-hexane/isopropanol = 80/20, flow rate 1.0 mL/min, λ = 254 nm, t<sub>minor</sub> = 16 min, t<sub>major</sub> = 17 min);

<sup>1</sup>H NMR (300 MHz, DMSO-*d*<sub>6</sub>) δ 8.85 (s, 1H), 7.56-7.33 (m, 5H), 7.32-7.28 (m, 1H), 7.27-7.21 (m, 2H), 7.13-7.05 (m, 1H), 3.80 (s, 3H), 3.15 (d, *J* = 16.6 Hz, 1H), 2.82 (d, *J* = 16.6 Hz, 1H), 2.07-1.69 (m, 2H), 0.97 (t, *J* = 7.3 Hz, 3H).

<sup>13</sup>C NMR (75 MHz, DMSO-*d*<sub>6</sub>) δ 176.3, 171.8, 164.0, 159.4, 134.6, 131.0, 130.0, 129.4, 129.1, 126.6, 118.5, 116.7, 111.1, 96.7, 55.3, 50.2, 27.5, 26.7, 9.2.

HRMS(ESI) m/z: [M+H]<sup>+</sup> calcd for C<sub>21</sub>H<sub>20</sub>N<sub>2</sub>O<sub>5</sub>H<sup>+</sup> 381.1445, found 381.1451.

(3aj):

(4a*R*,7a*S*)-3-(3-chlorophenyl)-4a-ethyl-7a-hydroxy-6-phenyl-4a,7a-dihydropyrrolo[3,4-*e*][1,2]oxazine-5,7(4*H*,6*H*)-dione

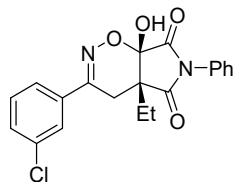

It was purified by flash chromatography [V(PE/EA) = 10/1 to 5/1] to afford white solid, 89% yield, 94% ee; mp = 166.2-167.7 °C; [α]<sub>D</sub><sup>20</sup> = +208.1 (c 1.0, CH<sub>2</sub>Cl<sub>2</sub>); the ee was determined by HPLC (Chiralpak AD-H, n-hexane/isopropanol = 90/10, flow rate 1.0 mL/min, λ = 254 nm, t<sub>major</sub> = 12 min, t<sub>minor</sub> = 13 min);

<sup>1</sup>H NMR (300 MHz, DMSO-*d*<sub>6</sub>) δ 8.91 (s, 1H), 7.88-7.70 (m, 2H), 7.63-7.46 (m, 5H), 7.31-7.20 (m, 2H), 3.19 (d, *J* = 17.0 Hz, 1H), 2.83 (d, *J* = 17.1 Hz, 1H), 2.01-1.81 (m, 2H), 0.97 (t, *J* = 7.4 Hz, 3H).

<sup>13</sup>C NMR (75 MHz, DMSO-*d*<sub>6</sub>) δ 176.1, 171.6, 162.2, 135.4, 133.7, 131.0, 130.8, 130.6, 129.4, 129.1, 126.6, 125.7, 124.7, 96.6, 49.8, 27.8, 25.9, 9.1.

HRMS(ESI) m/z: [M+H]<sup>+</sup> calcd for C<sub>21</sub>H<sub>20</sub>N<sub>2</sub>O<sub>5</sub>H<sup>+</sup> 385.0950; 387.0928, found 385.0961; 387.0941.

(3ak):

3-((4a*R*,7a*S*)-4a-ethyl-7a-hydroxy-5,7-dioxo-6-phenyl-4,4a,5,6,7,7a-hexahydropyrrolo[3,4-*e*][1,2]oxazin-3-yl)benzotrile

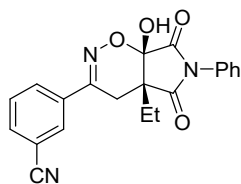

It was purified by flash chromatography [V(PE/EA) = 10/1 to 5/1] to afford white solid, 89% yield, 95% ee; mp = 198.4-200.2 °C;  $[\alpha]_D^{20} = +301.9$  (c 0.50, CH<sub>2</sub>Cl<sub>2</sub>); the ee was determined by HPLC (Chiralpak AD-H, n-hexane/isopropanol = 90/10, flow rate 1.0 mL/min,  $\lambda = 254$  nm,  $t_{\text{major}} = 26$  min,  $t_{\text{minor}} = 29$  min);

<sup>1</sup>H NMR (300 MHz, DMSO-*d*<sub>6</sub>)  $\delta$  8.96 (s, 1H), 8.29 (s, 1H), 8.15 (d,  $J = 9.0$  Hz, 1H), 7.99 (d,  $J = 7.8$  Hz, 1H), 7.75-7.64 (m, 1H), 7.56-7.43 (m, 3H), 7.26 (d,  $J = 7.8$  Hz, 2H), 3.24 (d,  $J = 17.3$  Hz, 1H), 2.87 (d,  $J = 17.4$  Hz, 1H), 1.92 (q,  $J = 7.3$  Hz, 2H), 0.98 (t,  $J = 7.3$  Hz, 3H).

<sup>13</sup>C NMR (75 MHz, DMSO-*d*<sub>6</sub>)  $\delta$  176.1, 171.5, 161.2, 134.5, 134.3, 131.0, 130.5, 130.1, 129.9, 129.4, 129.1, 126.7, 118.3, 112.2, 96.4, 49.5, 28.1, 25.3, 9.1.

HRMS(ESI) *m/z*: [M+H]<sup>+</sup> calcd for C<sub>21</sub>H<sub>17</sub>N<sub>3</sub>O<sub>4</sub>H<sup>+</sup> 376.1292, found 376.1302.

**(3al):**

**(4aR,7aS)-4a-ethyl-7a-hydroxy-3-(naphthalen-2-yl)-6-phenyl-4a,7a-dihydropyrrolo[3,4-*e*][1,2]oxazine-5,7(4H,6H)-dione**

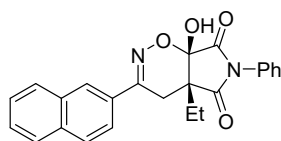

It was purified by flash chromatography [V(PE/EA) = 10/1 to 8/1] to afford white solid, 93% yield, 96% ee; mp = 153.7-156.5 °C;  $[\alpha]_D^{20} = +361.5$  (c 1.0, CH<sub>2</sub>Cl<sub>2</sub>); the ee was determined by HPLC (Chiralpak AD-H, n-hexane/isopropanol = 80/20, flow rate 1.0 mL/min,  $\lambda = 254$  nm,  $t_{\text{major}} = 22$  min,  $t_{\text{minor}} = 26$  min);

<sup>1</sup>H NMR (300 MHz, DMSO-*d*<sub>6</sub>)  $\delta$  8.91 (s, 1H), 8.44 (s, 1H), 8.15-7.88 (m, 4H), 7.67-7.40 (m, 5H), 7.34-7.12 (m, 2H), 3.34 (d,  $J = 16.6$  Hz, 1H), 2.99 (d,  $J = 16.5$  Hz, 1H), 2.19-1.65 (m, 2H), 1.02 (t,  $J = 7.3$  Hz, 3H).

<sup>13</sup>C NMR (75 MHz, DMSO-*d*<sub>6</sub>)  $\delta$  176.4, 171.8, 163.9, 133.9, 132.6, 131.0, 130.5, 129.4, 129.1, 128.8, 128.4, 127.6, 126.9, 126.7, 126.7, 122.5, 96.8, 50.2, 27.6, 26.3, 9.3.

HRMS(ESI) *m/z*: [M+H]<sup>+</sup> calcd for C<sub>24</sub>H<sub>20</sub>N<sub>2</sub>O<sub>4</sub>H<sup>+</sup> 401.1496, found 401.1500.

**(3am):**

**(4aR,7aS)-4a-ethyl-3-(furan-2-yl)-7a-hydroxy-6-phenyl-4a,7a-dihydropyrrolo[3,4-*e*][1,2]oxazine-5,7(4H,6H)-dione**

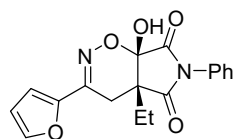

It was purified by flash chromatography [V(PE/EA) = 5/1 to 2/1] to afford white solid, 21% yield, 97% ee; mp = 178.9-182.3 °C;  $[\alpha]_D^{20} = +127.1$  (c 1.0, CH<sub>2</sub>Cl<sub>2</sub>); the ee was determined by HPLC (Chiralpak IC, n-hexane/isopropanol = 80/20, flow rate 1.0 mL/min,  $\lambda = 254$  nm,  $t_{\text{minor}} = 13$  min,  $t_{\text{major}} = 16$  min);

**<sup>1</sup>H NMR** (300 MHz, DMSO-*d*<sub>6</sub>) δ 9.15 (s, 1H), 7.95 (s, 1H), 7.75 (d, *J* = 3.5 Hz, 1H), 7.54-7.45 (m, 3H), 7.36-7.27 (m, 2H), 6.85-6.69 (m, 1H), 3.51 (d, *J* = 18.3 Hz, 1H), 3.19 (d, *J* = 18.3 Hz, 1H), 1.99 (dq, *J* = 11.5, 6.7 Hz, 2H), 0.99 (t, *J* = 7.3 Hz, 3H).

**<sup>13</sup>C NMR** (75 MHz, DMSO-*d*<sub>6</sub>) δ 176.2, 168.7, 145.4, 144.6, 132.1, 131.1, 129.2, 129.1, 126.9, 114.7, 112.6, 98.7, 51.2, 33.7, 25.0, 8.9.

**HRMS(ESI)** *m/z*: [M+H]<sup>+</sup> calcd for C<sub>18</sub>H<sub>16</sub>N<sub>2</sub>O<sub>5</sub>H<sup>+</sup> 341.1132, found 341.1143.

**(3am')**:

**(*R*)-4-ethyl-4-((*2Z*)-2-(furan-2-yl)-2-((2-(furan-2-yl)-2-(hydroxyimino)ethoxy)imino)ethyl)-1-phenylpyrrolidine-2,3,5-trione**

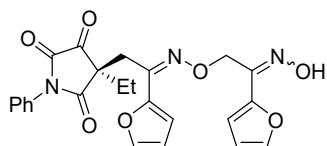

It was purified by flash chromatography [V(PE/EA) = 10/1 to 8/1] to afford white solid, 80% yield, 90% ee (1.2 eq: 98% yield, 90% ee); mp = 105.1-107.0 °C; [α]<sub>D</sub><sup>20</sup> = +124.7 (c 0.5, CH<sub>2</sub>Cl<sub>2</sub>); the ee was determined by HPLC (Chiralpak AD-H, n-hexane/isopropanol = 80/20, flow rate 1.0 mL/min, λ = 254 nm, *t*<sub>major</sub> = 15 min, *t*<sub>minor</sub> = 21 min); eluent: v(petroleum ether/ethyl acetate) = 10/1 to 8/1

**<sup>1</sup>H NMR** (300 MHz, DMSO-*d*<sub>6</sub>) δ 12.09 (s, 1H), 7.89 (s, 1H), 7.77 (s, 1H), 7.64-7.42 (m, 5H), 7.34 (d, *J* = 3.5 Hz, 1H), 7.03 (d, *J* = 3.6 Hz, 1H), 6.73-6.56 (m, 2H), 4.99-4.75 (m, 2H), 3.46 (d, *J* = 4.0 Hz, 2H), 2.08 (q, *J* = 7.4 Hz, 2H), 1.01 (t, *J* = 7.4 Hz, 3H).

**<sup>13</sup>C NMR** (75 MHz, DMSO-*d*<sub>6</sub>) δ 194.4, 174.9, 160.3, 144.9, 144.4, 143.3, 143.2, 142.1, 140.9, 131.0, 129.4, 129.1, 126.3, 118.9, 117.3, 112.6, 112.1, 73.6, 50.6, 34.0, 28.3, 8.3.

**HRMS(ESI)** *m/z*: [M+H]<sup>+</sup> calcd for C<sub>18</sub>H<sub>16</sub>N<sub>2</sub>O<sub>5</sub>H<sup>+</sup> 464.1452, found 464.1461.

**(3an)**:

**(4*aR*,7*aS*)-3-(benzofuran-2-yl)-4*a*-ethyl-7*a*-hydroxy-6-phenyl-4*a*,7*a*-dihydropyrrolo[3,4-*e*][1,2]oxazine-5,7-(4*H*,6*H*)-dione**

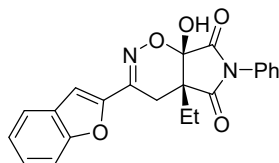

It was purified by flash chromatography [V(PE/EA) = 8/1 to 5/1] to afford white solid, 77% yield, 94% ee; mp = 189.7-190.1 °C; [α]<sub>D</sub><sup>20</sup> = +197.0 (c 1.0, CH<sub>2</sub>Cl<sub>2</sub>); the ee was determined by HPLC (Chiralpak AD-H, n-hexane/isopropanol = 80/20, flow rate 1.0 mL/min, λ = 254 nm, *t*<sub>major</sub> = 24 min, *t*<sub>minor</sub> = 38 min);

**<sup>1</sup>H NMR** (300 MHz, DMSO-*d*<sub>6</sub>) δ 8.96 (s, 1H), 7.81-7.60 (m, 3H), 7.57-7.42 (m, 4H), 7.37-7.22 (m, 3H), 3.21 (d, *J* = 16.4 Hz, 1H), 2.93 (d, *J* = 16.6 Hz, 1H), 2.11-1.72 (m, 2H), 0.99 (t, *J* = 7.3 Hz, 3H).

**<sup>13</sup>C NMR** (75 MHz, DMSO-*d*<sub>6</sub>) δ 176.0, 171.4, 156.3, 154.9, 148.7, 130.9, 129.3, 129.1, 127.3, 126.9, 126.6, 123.7, 122.2, 111.6, 110.2, 97.2, 49.6, 27.5, 25.4, 9.1.

**HRMS (ESI)** *m/z*: [M+H]<sup>+</sup> calcd for C<sub>22</sub>H<sub>18</sub>N<sub>2</sub>O<sub>5</sub>H<sup>+</sup> 391.1289, found 391.1288.

**(3an')**:

**(R)-4-((2Z)-2-(benzofuran-2-yl)-2-((2-(benzofuran-2-yl)-2-(hydroxyimino)ethoxy)imino)ethyl)-4-ethyl-1-phenylpyrrolidine-2,3,5-trione**

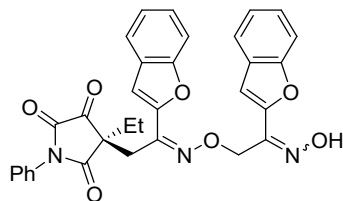

It was purified by flash chromatography [V(PE/EA) = 10/1 to 8/1] to afford white solid, 33% yield, 90% ee (1.2 eq; 95% yield, 90% ee); mp = 205.6-207.1 °C;  $[\alpha]_D^{20} = +171.2$  (c 0.5, CH<sub>2</sub>Cl<sub>2</sub>); the ee was determined by HPLC (Chiralpak AD-H, n-hexane/isopropanol = 80/20, flow rate 1.0 mL/min,  $\lambda = 254$  nm,  $t_{\text{major}} = 15$  min,  $t_{\text{minor}} = 20$  min);

**<sup>1</sup>H NMR** (300 MHz, DMSO-*d*<sub>6</sub>)  $\delta$  12.63 (s, 1H), 7.83 (s, 1H), 7.75 (d,  $J = 7.7$  Hz, 1H), 7.71-7.36 (m, 7H), 7.35-7.19 (m, 2H), 5.26-5.02 (m, 2H), 3.61 (d,  $J = 3.5$  Hz, 2H), 2.14 (q,  $J = 7.4$  Hz, 2H), 1.04 (t,  $J = 7.4$  Hz, 3H).

**<sup>13</sup>C NMR** (75 MHz, DMSO-*d*<sub>6</sub>)  $\delta$  206.1, 194.6, 174.9, 160.3, 153.1, 152.7, 145.4, 144.2, 143.1, 141.6, 131.0, 129.5, 129.2, 127.8, 127.5, 127.2, 126.6, 126.4, 123.9, 123.5, 122.7, 122.5, 114.7, 113.4, 111.7, 111.4, 74.4, 50.8, 34.1, 28.5, 8.5.

**HRMS** (ESI)  $m/z$ : [M+H]<sup>+</sup> calcd for C<sub>32</sub>H<sub>25</sub>N<sub>3</sub>O<sub>7</sub>H<sup>+</sup> 564.1765, found 564.1766.

**(3ao)**:

**(4aR,7aS)-3-(benzo[b]thiophen-2-yl)-4a-ethyl-7a-hydroxy-6-phenyl-4a,7a-dihydropyrrolo[3,4-e][1,2]oxazine-5,7(4H,6H)-dione**

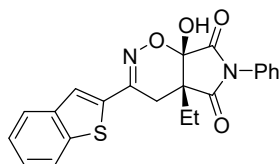

It was purified by flash chromatography [V(PE/EA) = 10/1 to 8/1] to afford white solid, 73% yield, 94% ee; mp = 167.8-169.1 °C;  $[\alpha]_D^{20} = +203.0$  (c 0.2, CH<sub>2</sub>Cl<sub>2</sub>); the ee was determined by HPLC (Chiralpak AD-H, n-hexane/isopropanol = 80/20, flow rate 1.0 mL/min,  $\lambda = 254$  nm,  $t_{\text{major}} = 23$  min,  $t_{\text{minor}} = 28$  min);

**<sup>1</sup>H NMR** (600 MHz, DMSO-*d*<sub>6</sub>)  $\delta$  8.98 (s, 1H), 8.17 (s, 1H), 7.99 (d,  $J = 7.8$  Hz, 1H), 7.91 (d,  $J = 7.5$  Hz, 1H), 7.55-7.42 (m, 5H), 7.25 (d,  $J = 7.7$  Hz, 2H), 3.34 (d,  $J = 16.6$  Hz, 1H), 2.99 (d,  $J = 16.6$  Hz, 1H), 1.98-1.88 (m, 2H), 1.01 (t,  $J = 7.4$  Hz, 3H).

**<sup>13</sup>C NMR** (150 MHz, DMSO-*d*<sub>6</sub>)  $\delta$  176.0, 171.4, 160.2, 139.6, 138.9, 136.3, 131.0, 129.4, 129.1, 127.1, 126.7, 126.6, 125.0, 124.8, 122.7, 97.2, 49.6, 27.6, 25.8, 9.1.

**HRMS**(ESI)  $m/z$ : [M+H]<sup>+</sup> calcd for C<sub>22</sub>H<sub>18</sub>N<sub>2</sub>O<sub>4</sub>S H<sup>+</sup> 407.1072, found 407.1060.

**(3ao')**:

**(R)-4-((2Z)-2-(benzo[b]thiophen-2-yl)-2-((2-(benzo[b]thiophen-2-yl)-2-(hydroxyimino)ethoxy)imino)ethyl)-4-ethyl-1-phenylpyrrolidine-2,3,5-trione**

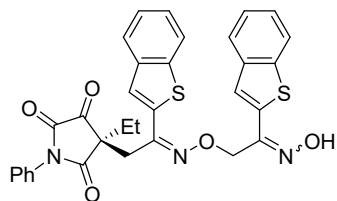

It was purified by flash chromatography [V(PE/EA) = 8/1 to 4/1] to afford white solid, 28% yield, 96% ee (1.2 eq: 96% yield, 90% ee); mp = 115.4-116.4 °C;  $[\alpha]_D^{20} = +202.1$  (c 1.0, CH<sub>2</sub>Cl<sub>2</sub>); the ee was determined by HPLC (Chiralpak AD-H, n-hexane/isopropanol = 80/20, flow rate 1.0 mL/min,  $\lambda = 254$  nm,  $t_{\text{major}} = 41$  min,  $t_{\text{minor}} = 44$  min);

<sup>1</sup>H NMR (300 MHz, DMSO-*d*<sub>6</sub>)  $\delta$  12.67 (s, 1H), 8.20 (s, 1H), 8.04-7.73 (m, 5H), 7.64-7.37 (m, 9H), 5.28-5.03 (m, 2H), 3.89-3.65 (m, 2H), 2.16 (q,  $J = 7.4$  Hz, 2H), 1.11 (t,  $J = 7.5$  Hz, 3H).

<sup>13</sup>C NMR (75 MHz, DMSO-*d*<sub>6</sub>)  $\delta$  212.0, 192.4, 177.9, 164.1, 162.4, 159.0, 158.4, 154.5, 154.2, 148.5, 147.6, 146.8, 146.7, 146.6, 146.5, 144.1, 143.8, 143.7, 143.3, 142.4, 142.0, 141.9, 139.5, 93.4, 68.4, 53.6, 45.9, 25.8.

HRMS(ESI) *m/z*: [M+H]<sup>+</sup> calcd for C<sub>32</sub>H<sub>25</sub>N<sub>3</sub>O<sub>5</sub>S<sub>2</sub>H<sup>+</sup> 596.1318, found 596.1308.

**(3ap')**:

**(R)-4-ethyl-4-((2E)-2-((2-(hydroxyimino)propoxy)imino)propyl)-1-phenylpyrrolidine-2,3,5-trione**

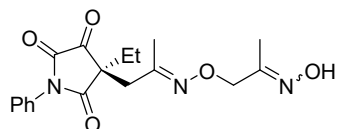

It was purified by flash chromatography [V(PE/EA/DCM) = 10/1/1 to 5/1/1] to afford white solid, 78% yield, 84% ee; mp = 131.1-131.9 °C;  $[\alpha]_D^{20} = +19.9$  (c 1.0, CH<sub>2</sub>Cl<sub>2</sub>); the ee was determined by HPLC (Chiralpak AD-H, n-hexane/isopropanol = 80/20, flow rate 1.0 mL/min,  $\lambda = 254$  nm,  $t_{\text{major}} = 13.6$  min,  $t_{\text{minor}} = 14.6$  min);

<sup>1</sup>H NMR (300 MHz, DMSO-*d*<sub>6</sub>)  $\delta$  10.85 (s, 1H), 7.69-7.26 (m, 5H), 4.39-4.16 (m, 2H), 3.00 (s, 2H), 1.94 (q,  $J = 7.5$  Hz, 2H), 1.81 (s, 3H), 1.65 (s, 3H), 0.95 (t,  $J = 7.4$  Hz, 3H).

<sup>13</sup>C NMR (75 MHz, DMSO-*d*<sub>6</sub>)  $\delta$  194.6, 175.0, 160.2, 155.1, 151.8, 131.1, 129.3, 129.1, 126.3, 75.0, 50.6, 28.1, 14.3, 11.3, 8.2.

HRMS(ESI) *m/z*: [M+H]<sup>+</sup> calcd for C<sub>18</sub>H<sub>21</sub>N<sub>3</sub>O<sub>5</sub>H<sup>+</sup> 360.1554, found 360.1556.

**(3ama)**:

**(R)-4-ethyl-4-((2Z)-2-(furan-2-yl)-2-((2-(hydroxyimino)-2-phenylethoxy)imino)ethyl)-1-phenylpyrrolidine-2,3,5-trione**

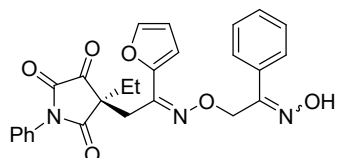

It was purified by flash chromatography [V(PE/EA) = 5/1] to afford white solid, 95% yield, 87% ee; mp = 116.0-117.7 °C;  $[\alpha]_D^{20} = +66.1$  (c 1.0, CH<sub>2</sub>Cl<sub>2</sub>); the ee was determined by HPLC (Chiralpak AD-H, n-hexane/isopropanol = 80/20, flow rate 1.0 mL/min,  $\lambda = 254$  nm,  $t_{\text{major}} = 29$  min,  $t_{\text{minor}} = 39$  min);

**<sup>1</sup>H NMR** (300 MHz, DMSO-*d*<sub>6</sub>) δ 11.40 (s, 1H), 7.84 (s, 1H), 7.63-7.48 (m, 5H), 7.45-7.29 (m, 5H), 6.80 (d, *J* = 3.6 Hz, 1H), 6.62-6.45 (m, 1H), 4.98-4.64 (m, 2H), 3.41-3.32 (m, 2H), 2.05 (q, *J* = 7.3 Hz, 2H), 0.99 (t, *J* = 7.4 Hz, 3H).

**<sup>13</sup>C NMR** (75 MHz, DMSO-*d*<sub>6</sub>) δ 194.4 , 174.8 , 160.3 , 150.7 , 144.9 , 143.2 , 142.4 , 131.6 , 131.0 , 129.4 , 129.2 , 128.9 , 128.3 , 128.1 , 126.5 , 126.3 , 118.9 , 112.5 , 75.9 , 50.6 , 34.0 , 28.3 , 8.3 .

**HRMS**(ESI) *m/z*[*M*+*H*]<sup>+</sup> calcd for C<sub>26</sub>H<sub>23</sub>N<sub>3</sub>O<sub>6</sub> H<sup>+</sup> 474.1660, found 474.1663.

(5):

**(*R*)-4-ethyl-4-(2-oxo-2-phenylethyl)-1-phenylpyrrolidine-2,3,5-trione**

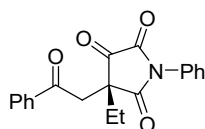

It was purified by flash chromatography [V(PE/EA) = 10/1 to 8/1] to afford yellow solid, 99% yield, 93% ee; mp = 117.0-118.5 °C; [ $\alpha$ ] <sup>D</sup><sub>20</sub> = +42.6 (c 1.0, CH<sub>2</sub>Cl<sub>2</sub>); the ee was determined by HPLC (Chiralpak AD-H, n-hexane/isopropanol = 80/20, flow rate 1.0 mL/min,  $\lambda$  = 254 nm, *t*<sub>major</sub> = 12 min, *t*<sub>minor</sub> = 13 min); eluent: v(petroleum ether/ethyl acetate) = 8/1

**<sup>1</sup>H NMR** (300 MHz, DMSO-*d*<sub>6</sub>) δ 8.16-7.95 (m, 2H), 7.75-7.66 (m, 1H), 7.65-7.49 (m, 5H), 7.43-7.36 (m, 2H), 4.16 (q, *J* = 19.2 Hz, 2H), 2.13-1.99 (m, 2H), 1.04 (t, *J* = 7.4 Hz, 3H).

**<sup>13</sup>C NMR** (75 MHz, DMSO-*d*<sub>6</sub>) δ 198.9, 196.1, 175.5, 160.0, 134.7, 134.0, 131.2, 129.4, 129.3, 129.0, 128.8, 126.6, 50.7, 45.7, 26.7, 8.5.

**HRMS**(ESI) *m/z*: [*M*+ Na]<sup>+</sup> calcd for C<sub>20</sub>H<sub>17</sub>NO<sub>4</sub>Na<sup>+</sup> 358.1050, found 358.1050.



## 5 HPLC, NMR and HRMS spectra of products

3aa

$^1\text{H}$  NMR (300 MHz,  $\text{DMSO-}d_6$ )

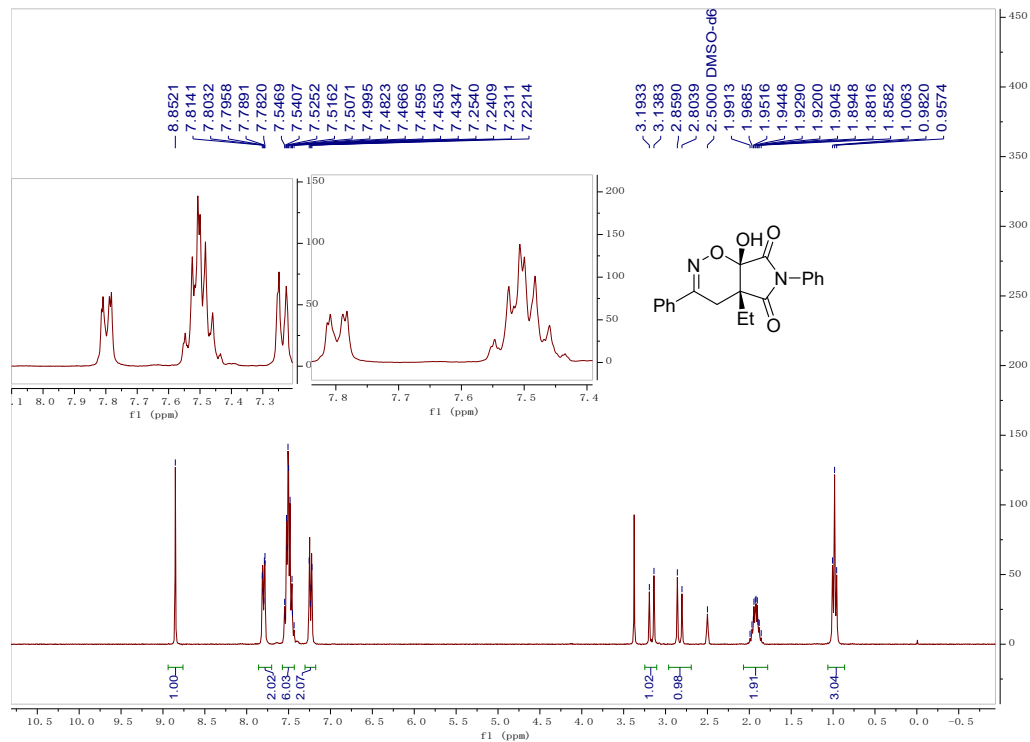

$^{13}\text{C}$  NMR (75 MHz,  $\text{DMSO-}d_6$ )

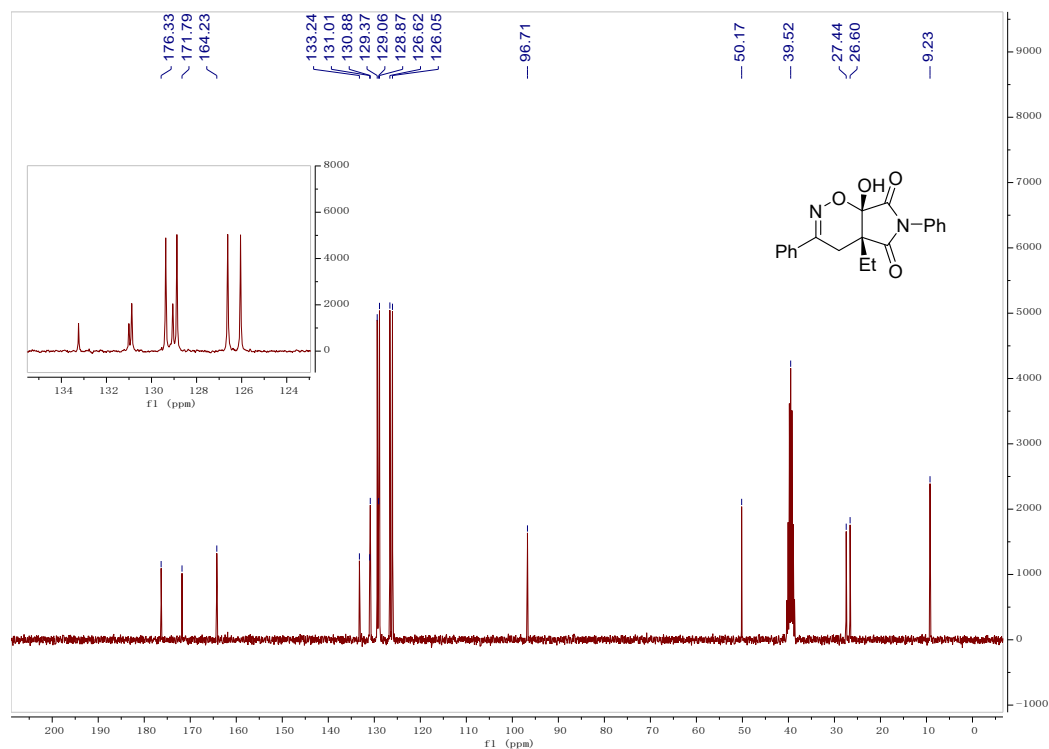

**3ba****<sup>1</sup>H NMR (300 MHz, DMSO-*d*<sub>6</sub>)**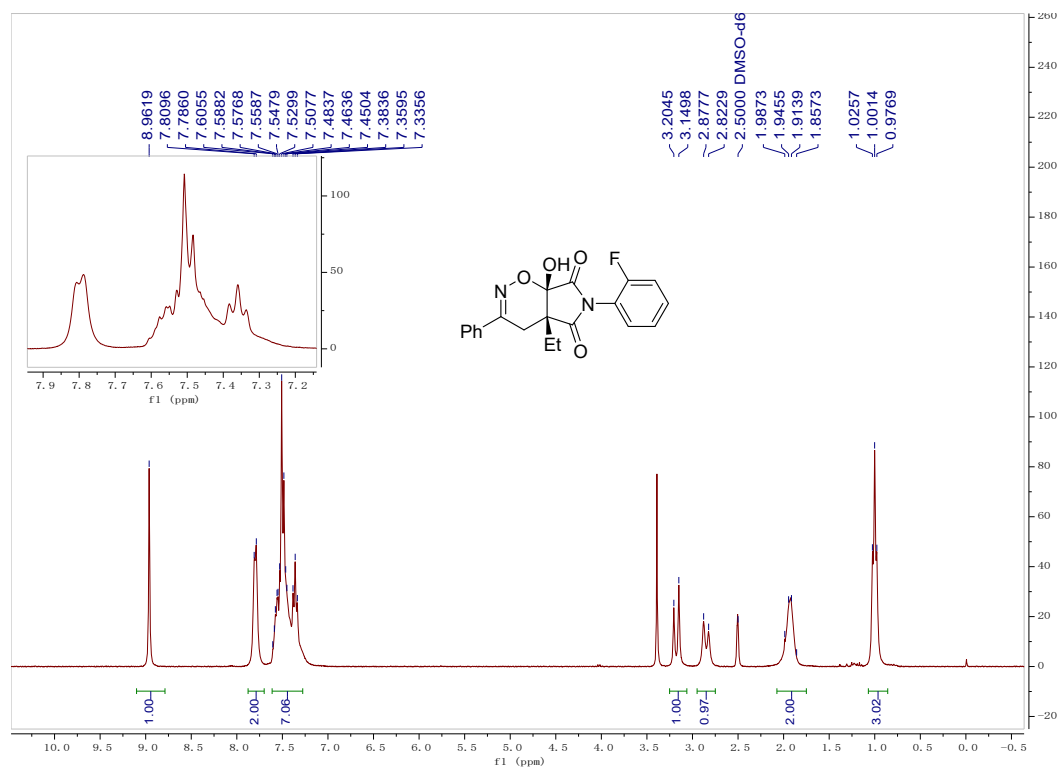**<sup>13</sup>C NMR (75 MHz, DMSO-*d*<sub>6</sub>)**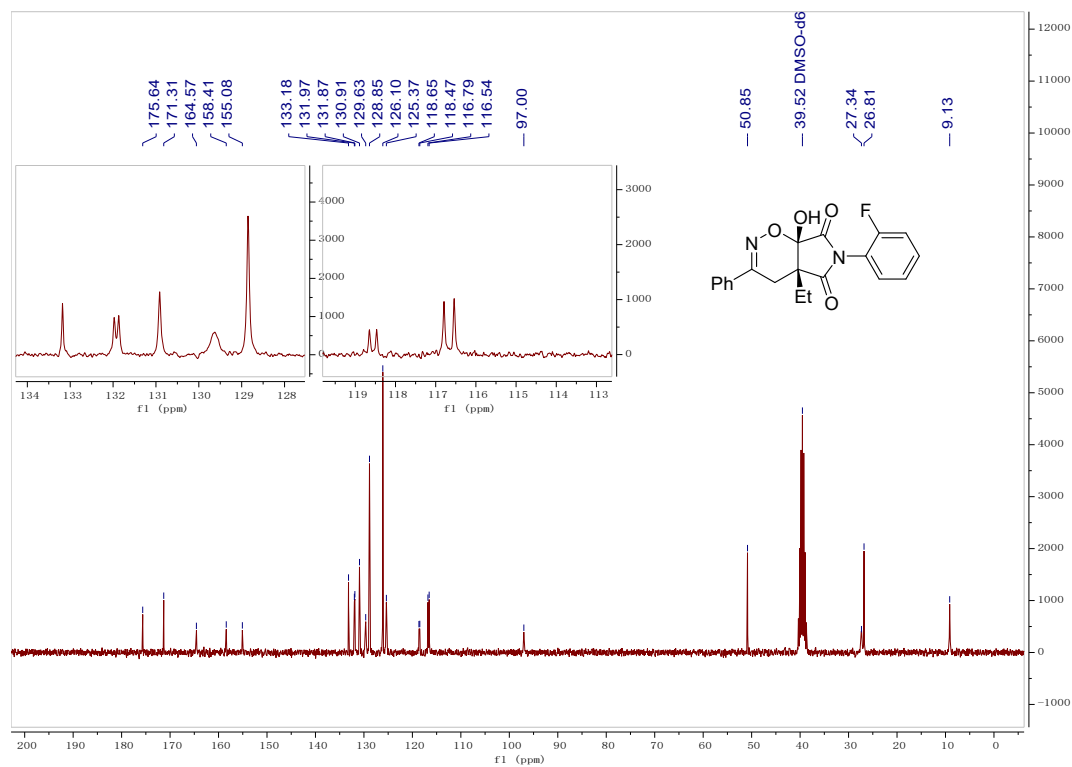

**3ca****<sup>1</sup>H NMR (300 MHz, DMSO-*d*<sub>6</sub>)**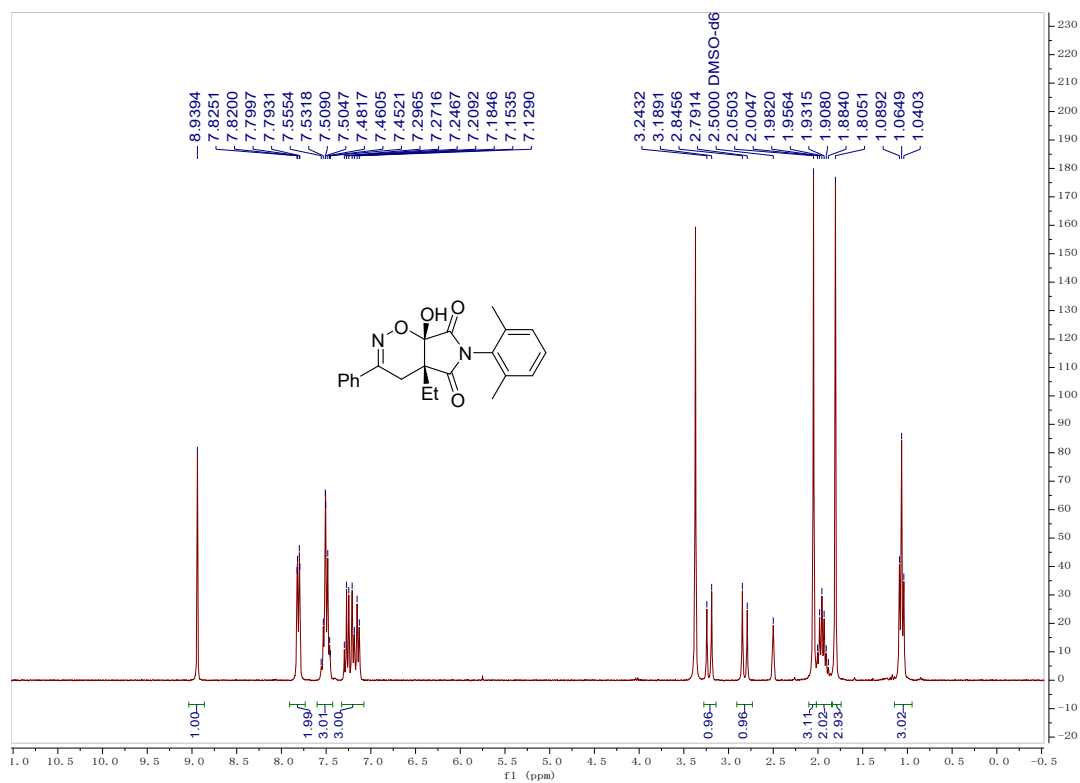**<sup>13</sup>C NMR (75 MHz, DMSO-*d*<sub>6</sub>)**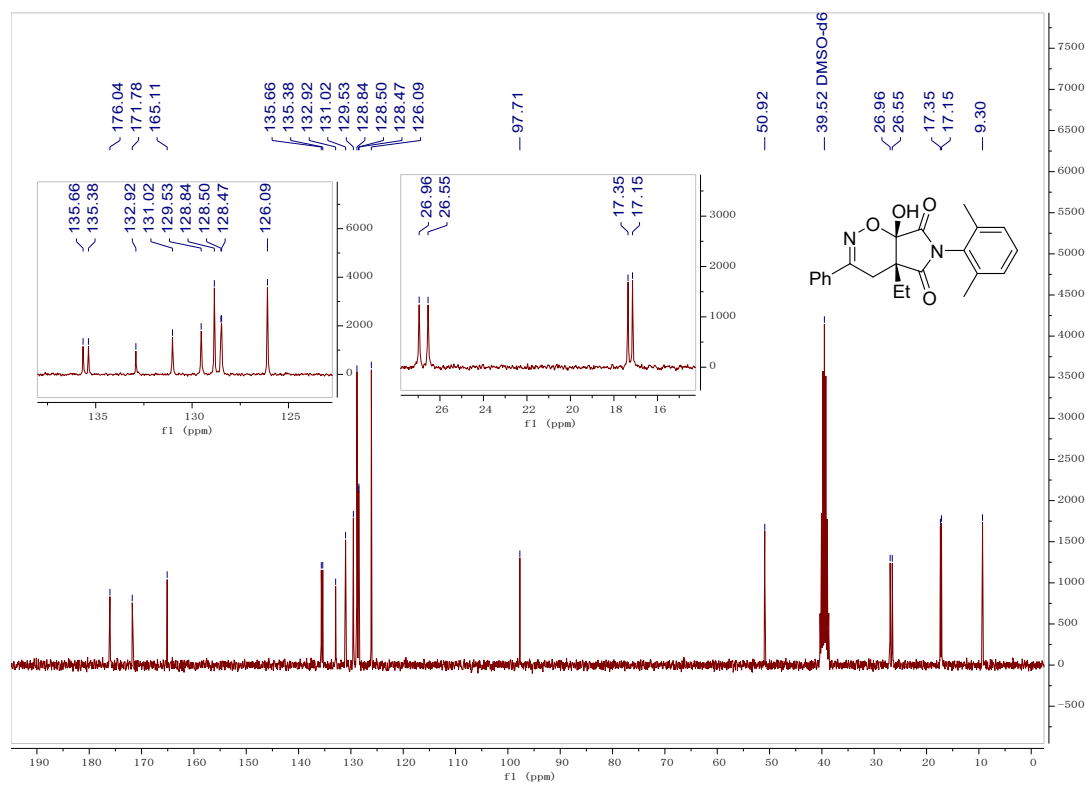

### 3da

<sup>1</sup>H NMR (300 MHz, DMSO-d<sub>6</sub>)

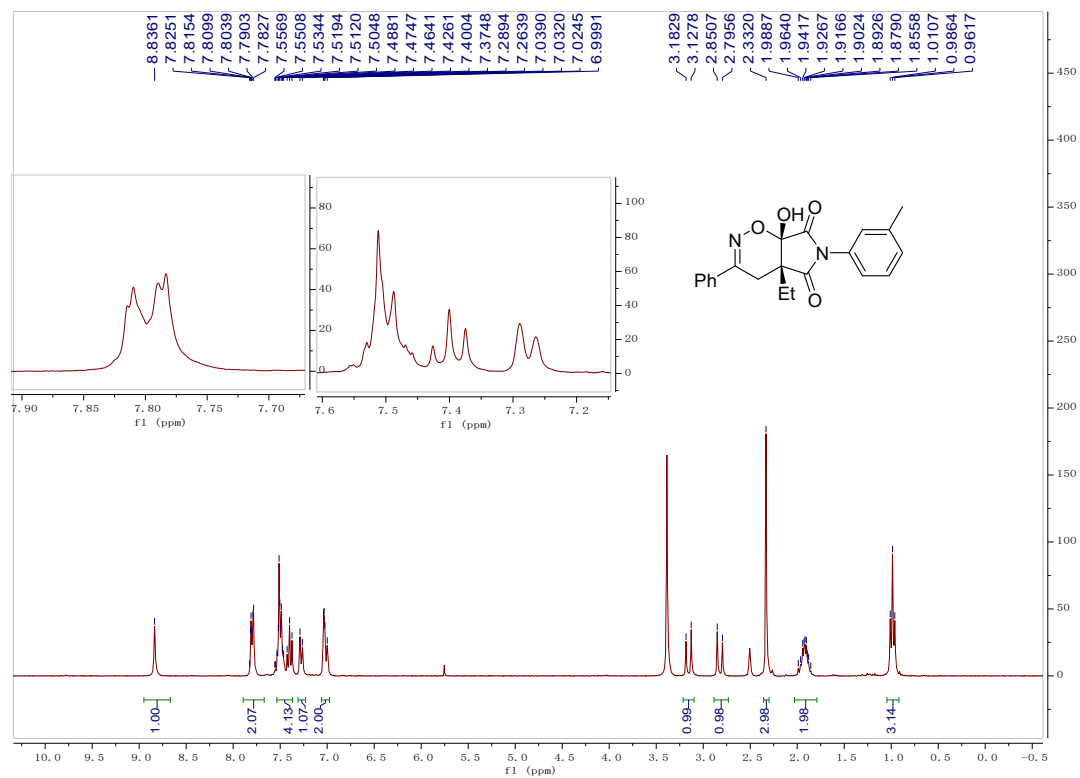

<sup>13</sup>C NMR (75 MHz, DMSO-d<sub>6</sub>)

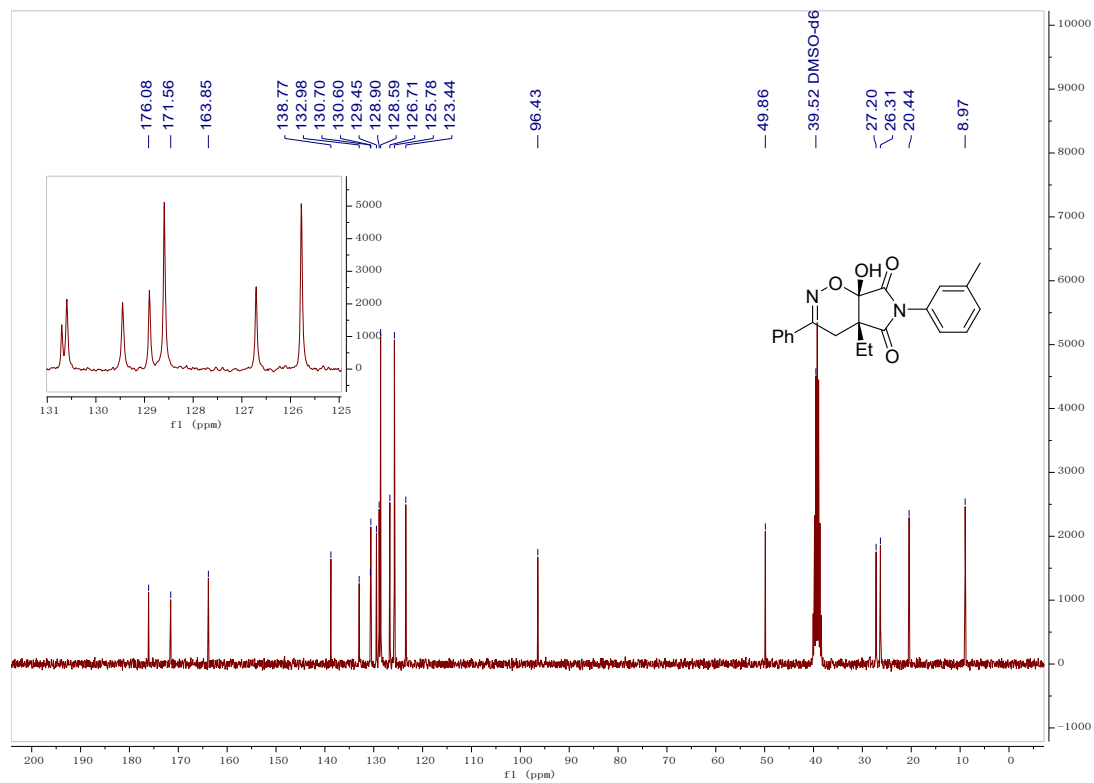

3ea

<sup>1</sup>H NMR (300 MHz, DMSO-d<sub>6</sub>)

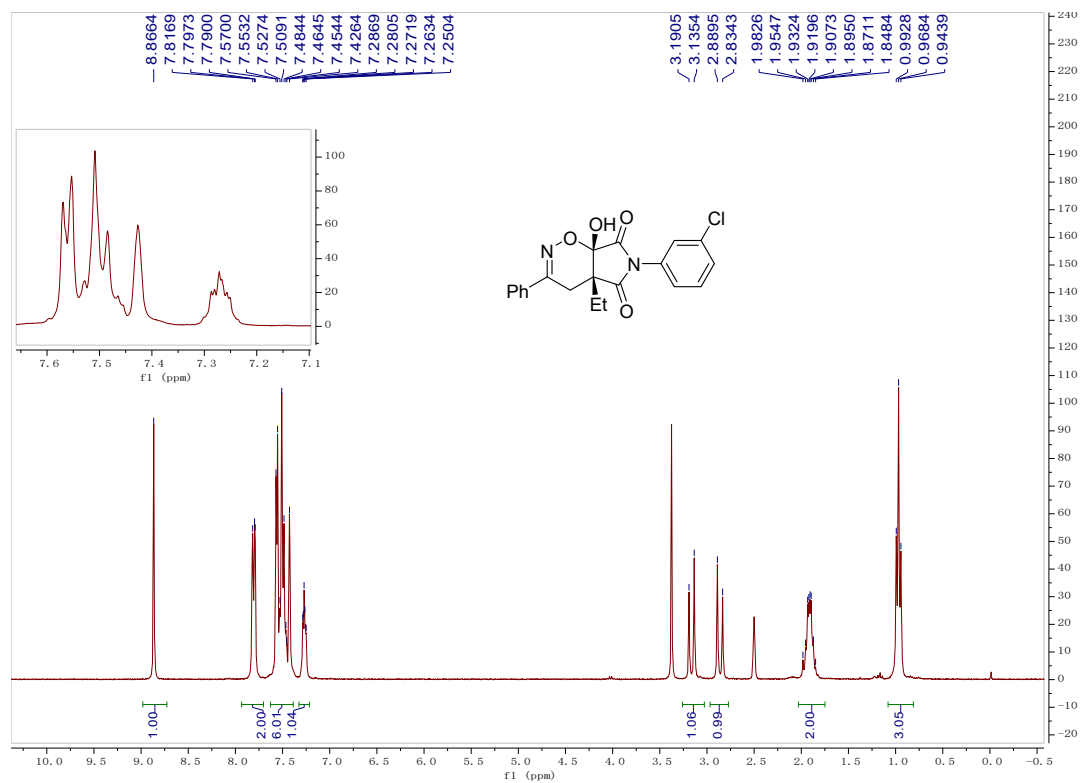

<sup>13</sup>C NMR (75 MHz, DMSO-d<sub>6</sub>)

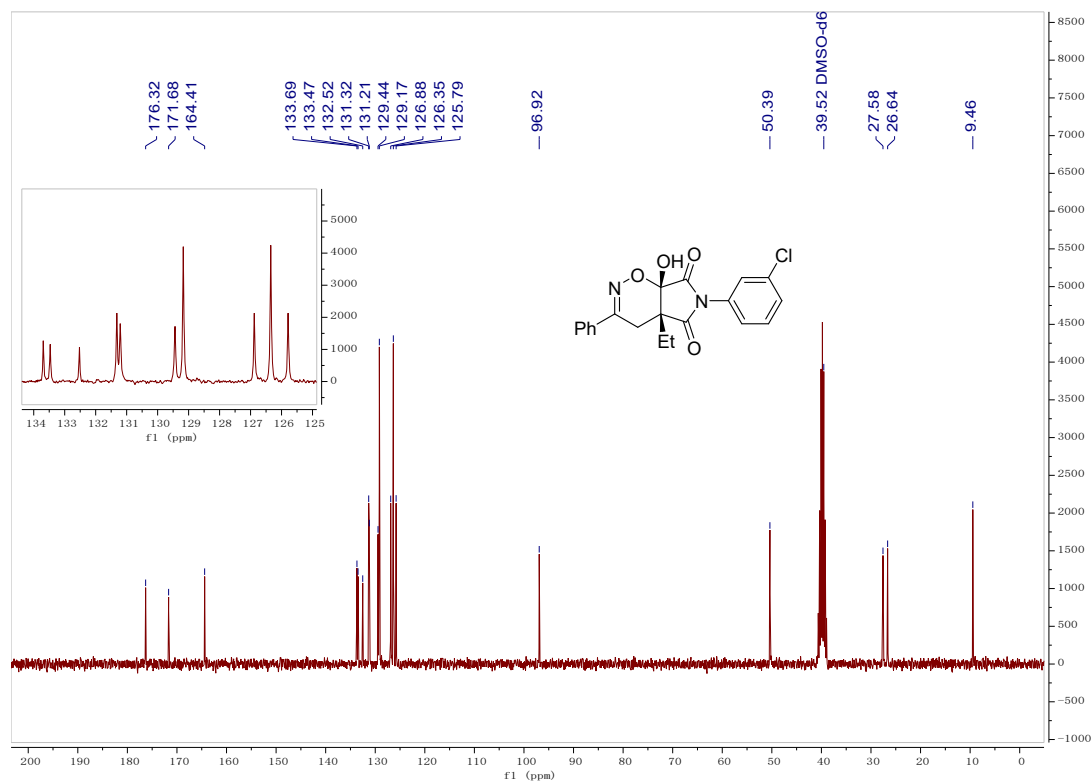

**3fa**<sup>1</sup>H NMR (300 MHz, DMSO-d<sub>6</sub>)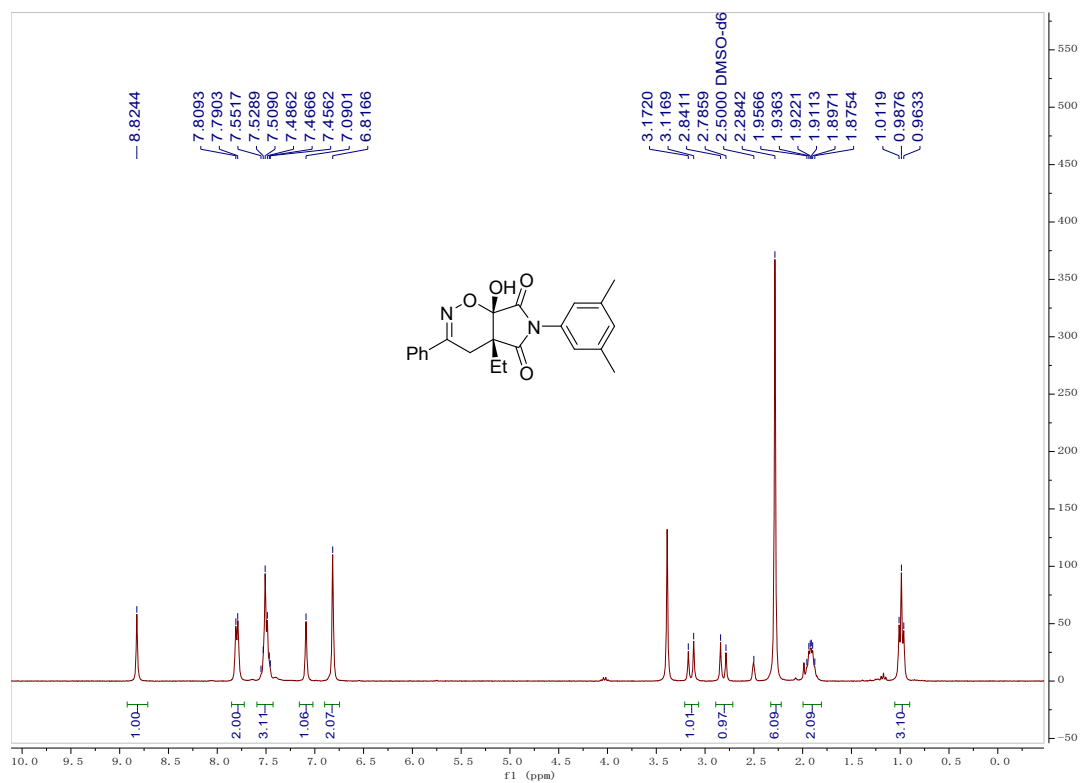<sup>13</sup>C NMR (75 MHz, DMSO-d<sub>6</sub>)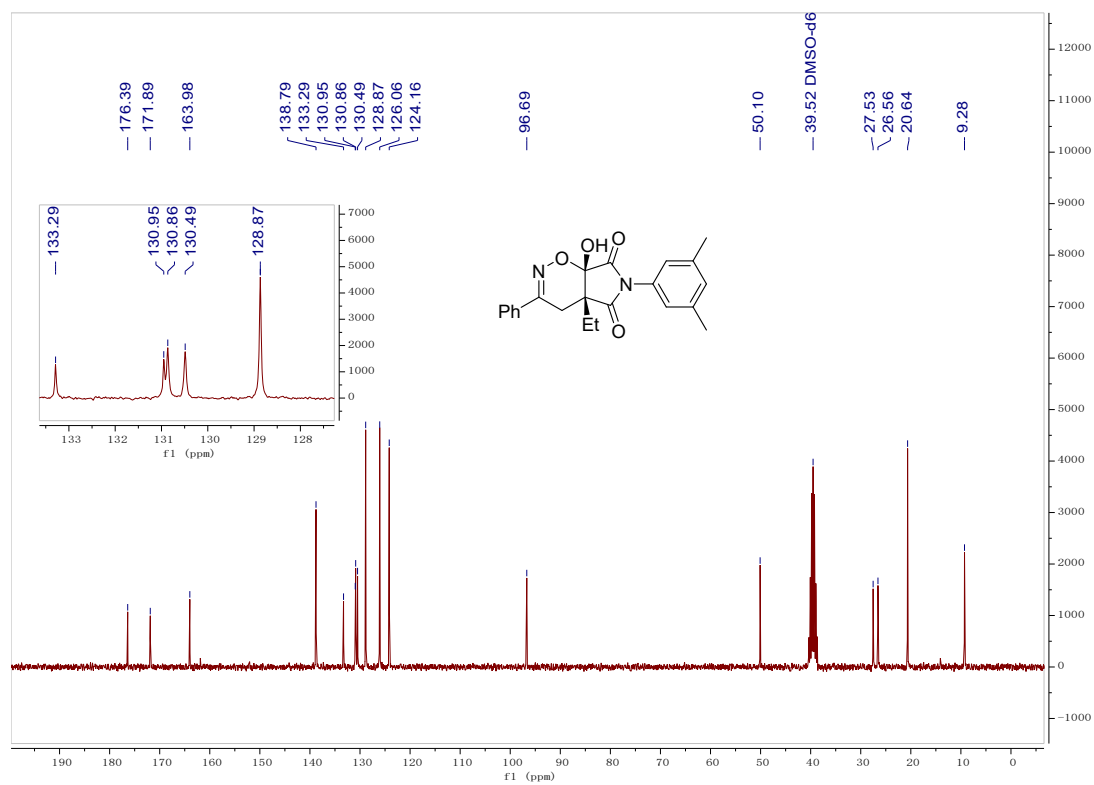

### 3ga

<sup>1</sup>H NMR (300 MHz, DMSO-d<sub>6</sub>)

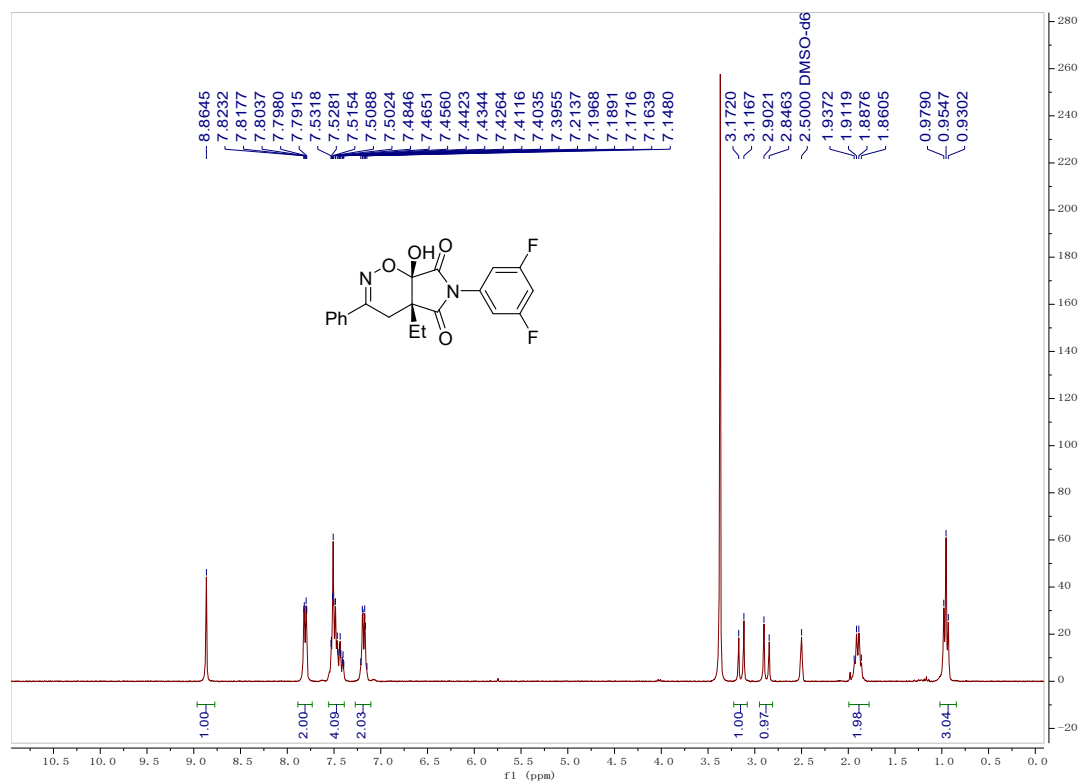

<sup>13</sup>C NMR (75 MHz, DMSO-d<sub>6</sub>)

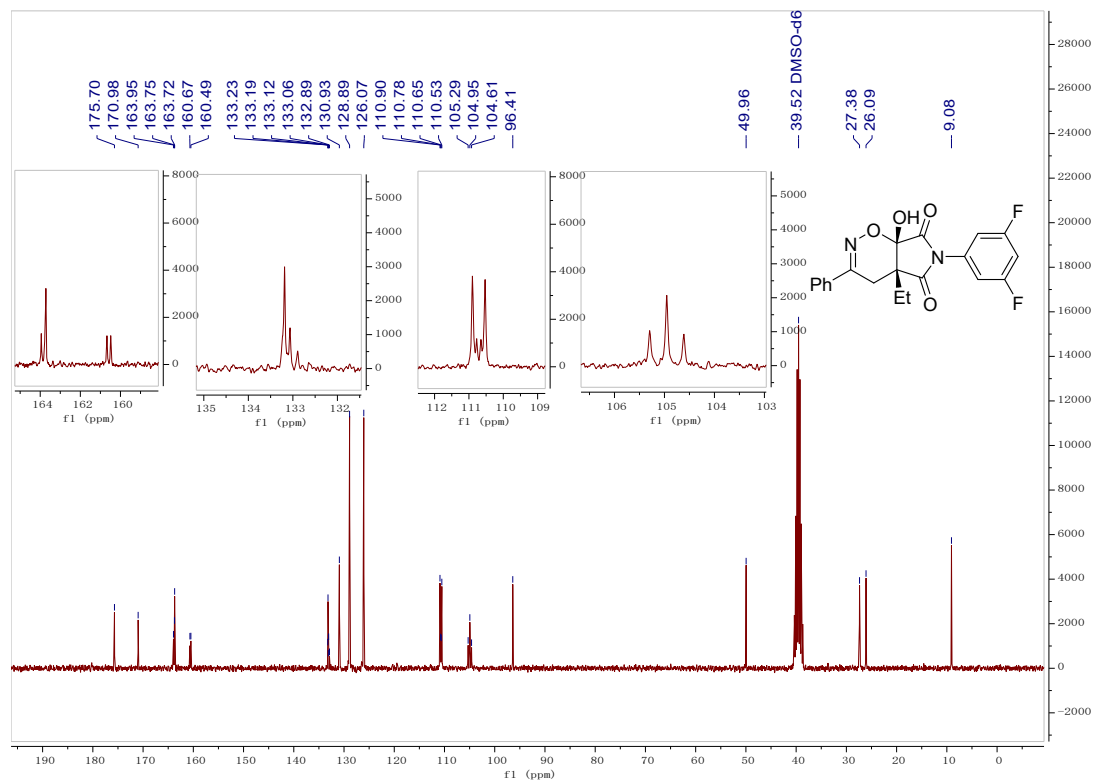

### 3ha

$^1\text{H}$  NMR (300 MHz,  $\text{DMSO-}d_6$ )

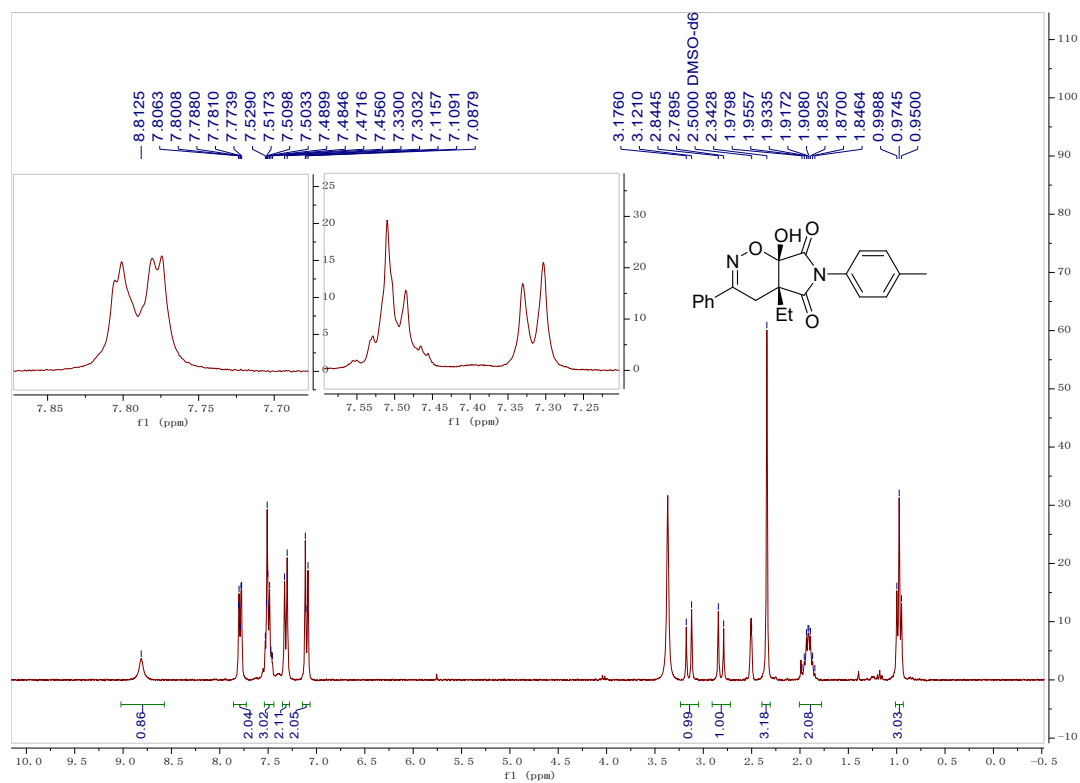

$^{13}\text{C}$  NMR (75 MHz,  $\text{DMSO-}d_6$ )

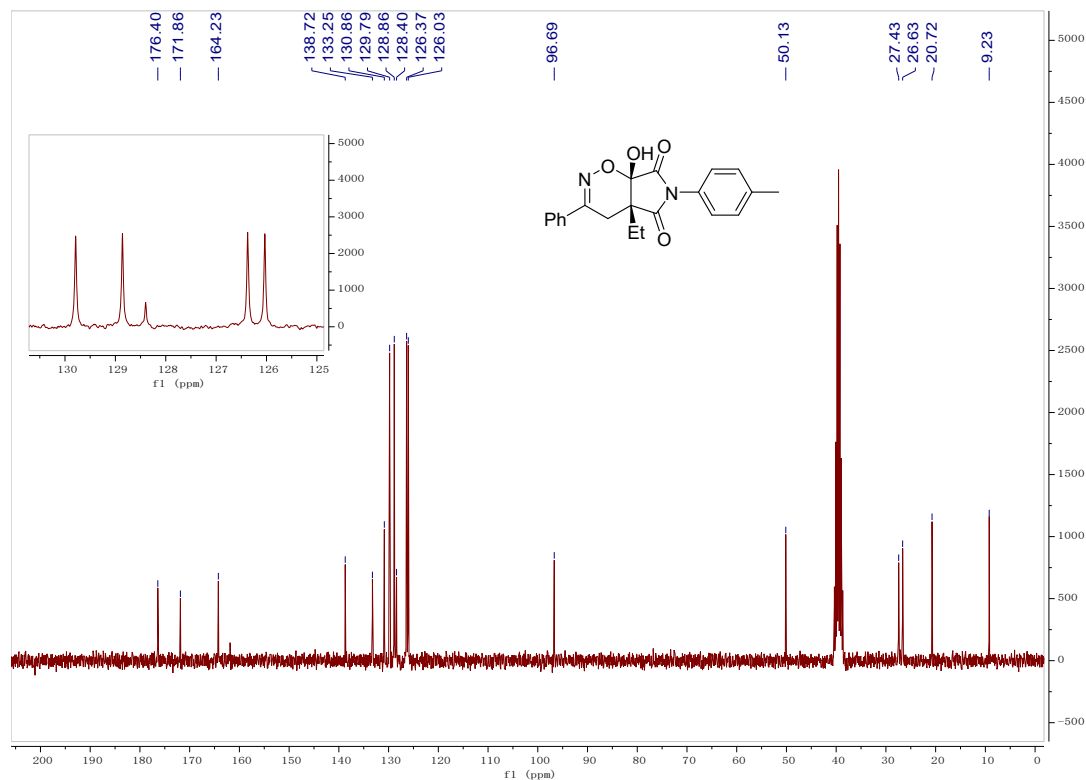



3ia

$^1\text{H}$  NMR (300 MHz,  $\text{DMSO-}d_6$ )

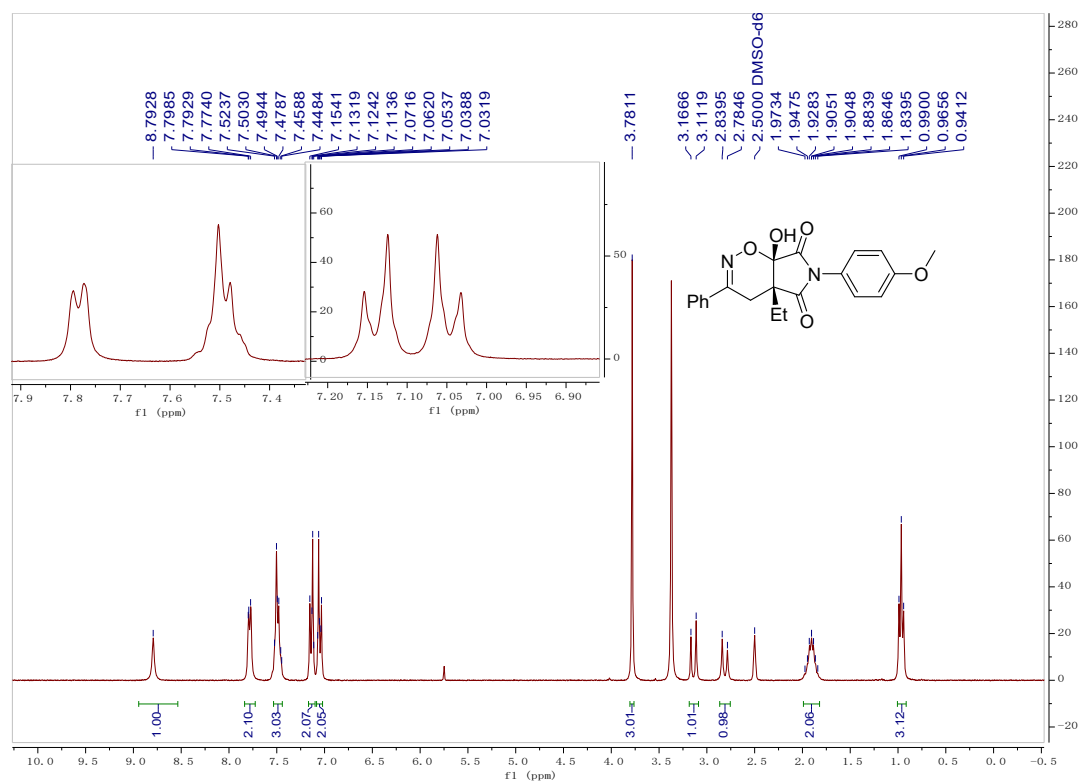

$^{13}\text{C}$  NMR (75 MHz,  $\text{DMSO-}d_6$ )

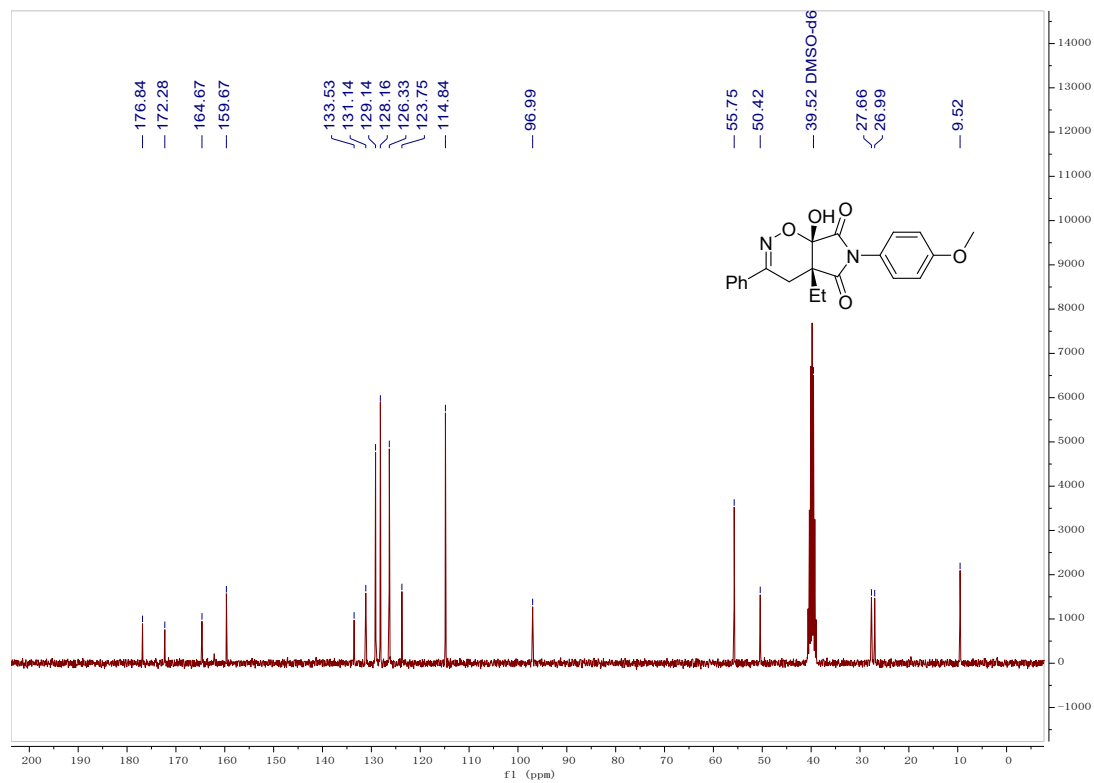

3ja

<sup>1</sup>H NMR (300 MHz, DMSO-d<sub>6</sub>)

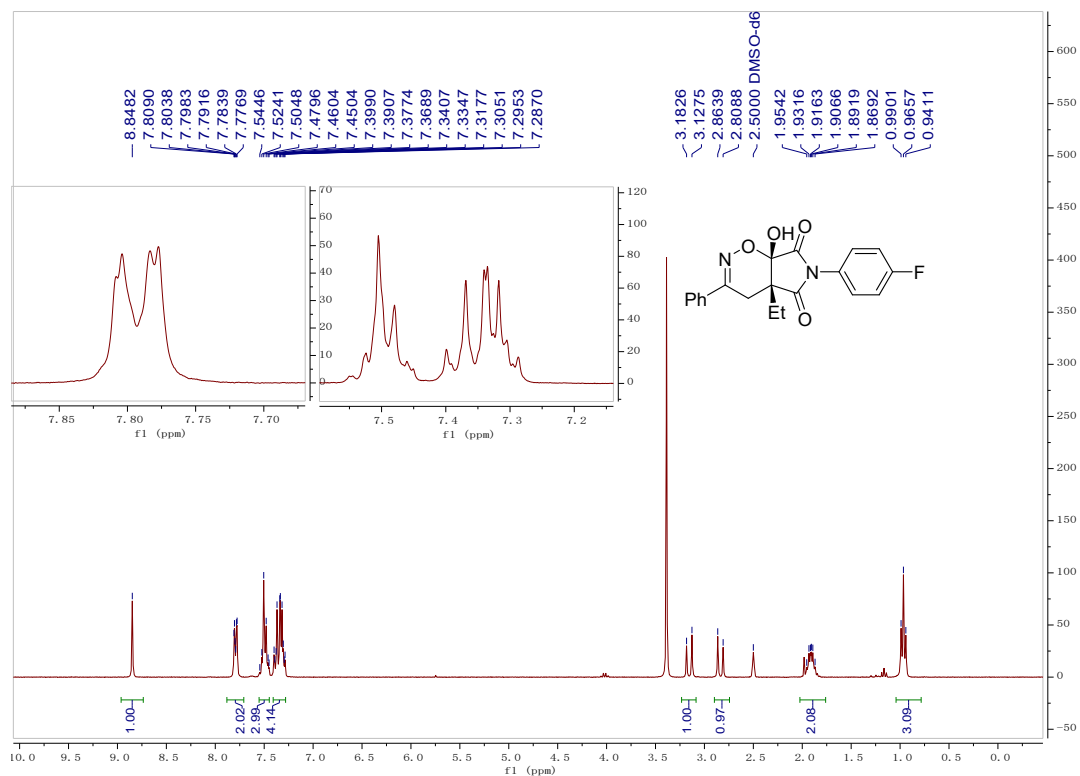

<sup>13</sup>C NMR (75 MHz, DMSO-d<sub>6</sub>)

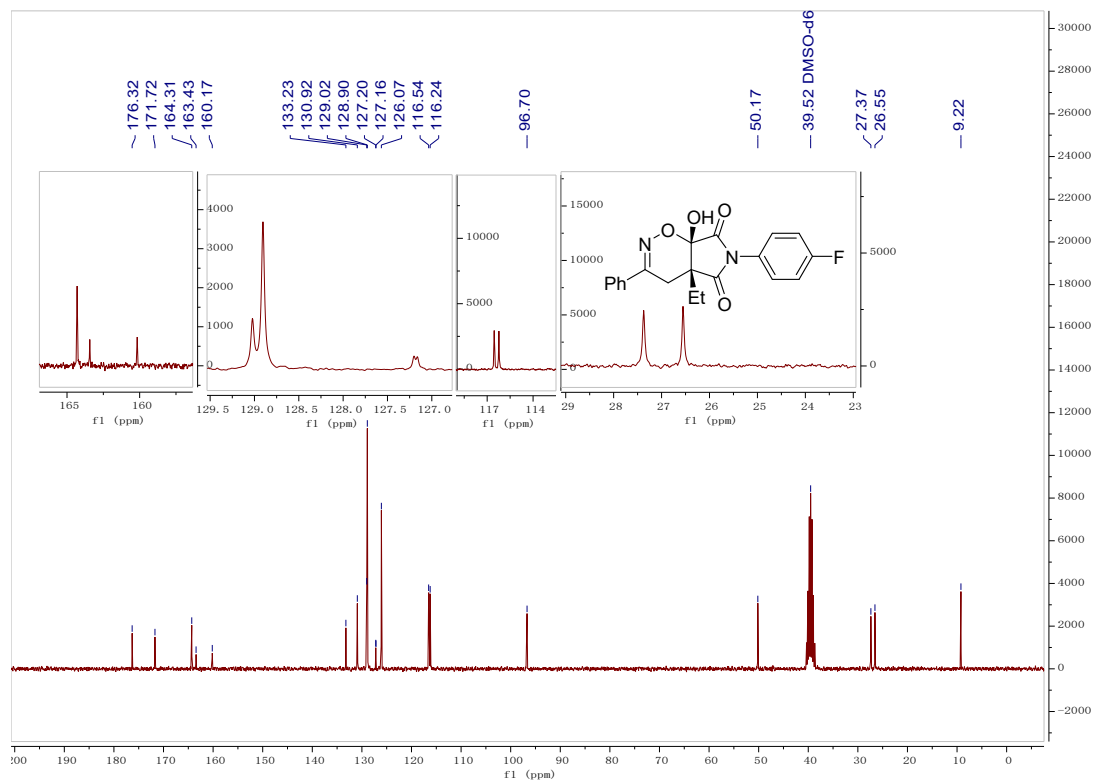

3ka

<sup>1</sup>H NMR (300 MHz, DMSO-d<sub>6</sub>)

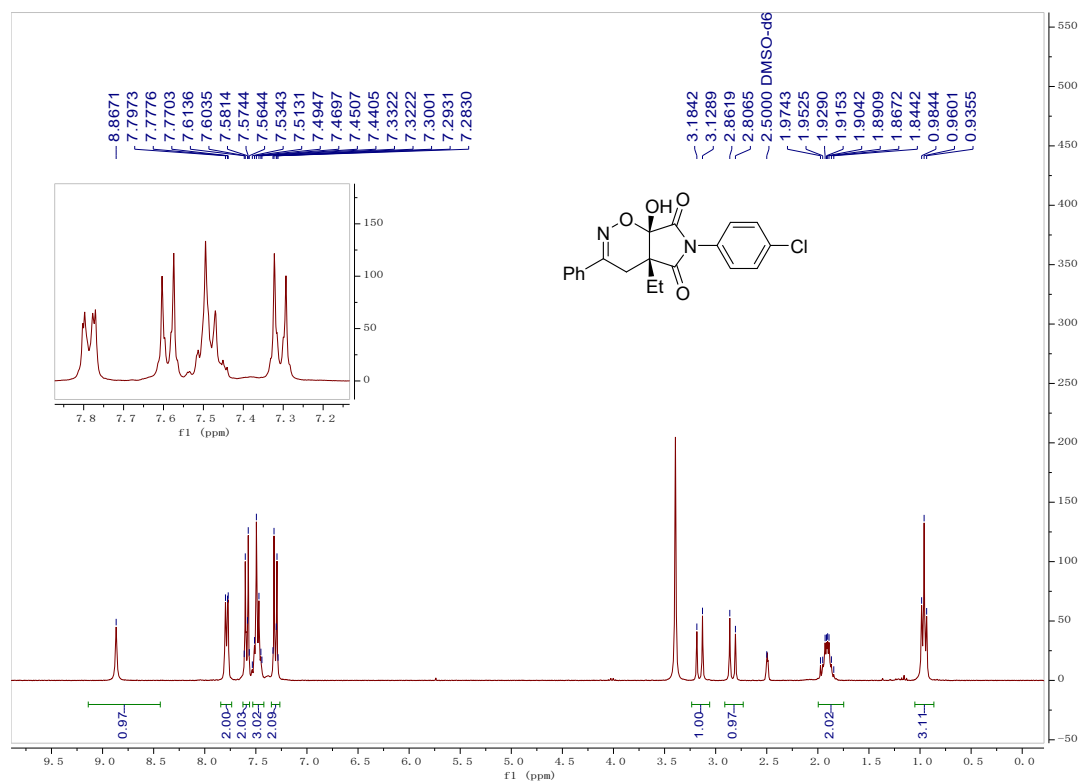

<sup>13</sup>C NMR (75 MHz, DMSO-d<sub>6</sub>)

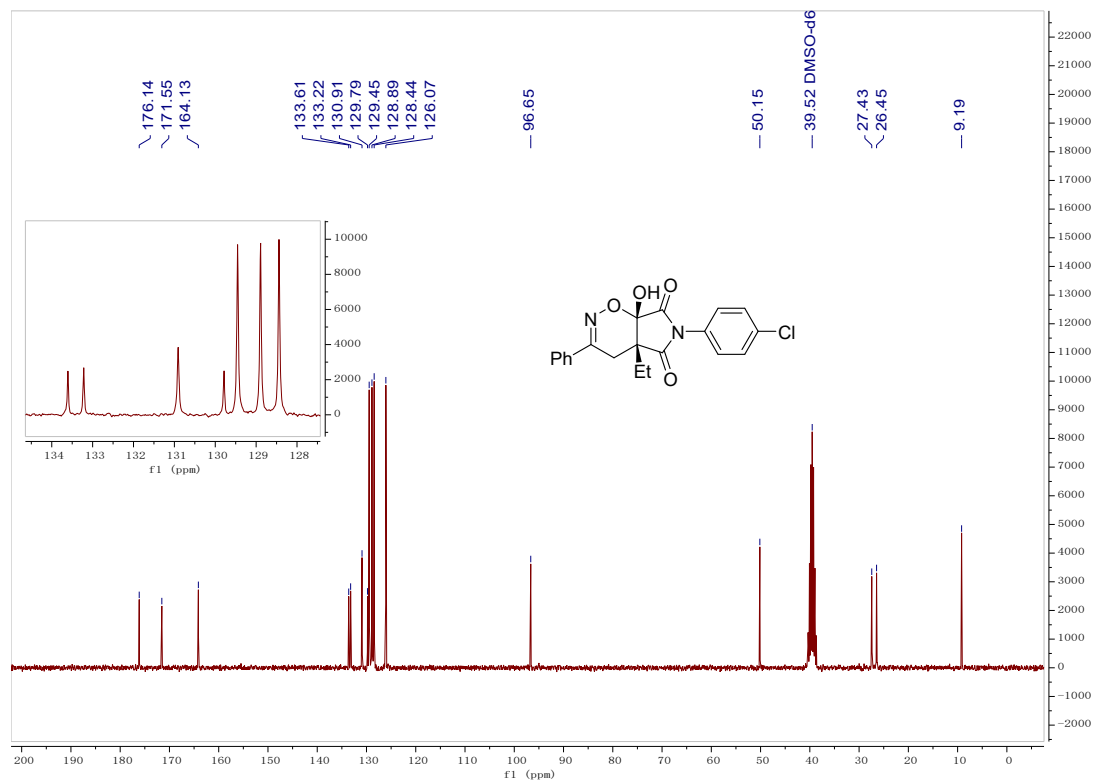

**3la****<sup>1</sup>H NMR (300 MHz, DMSO-*d*<sub>6</sub>)**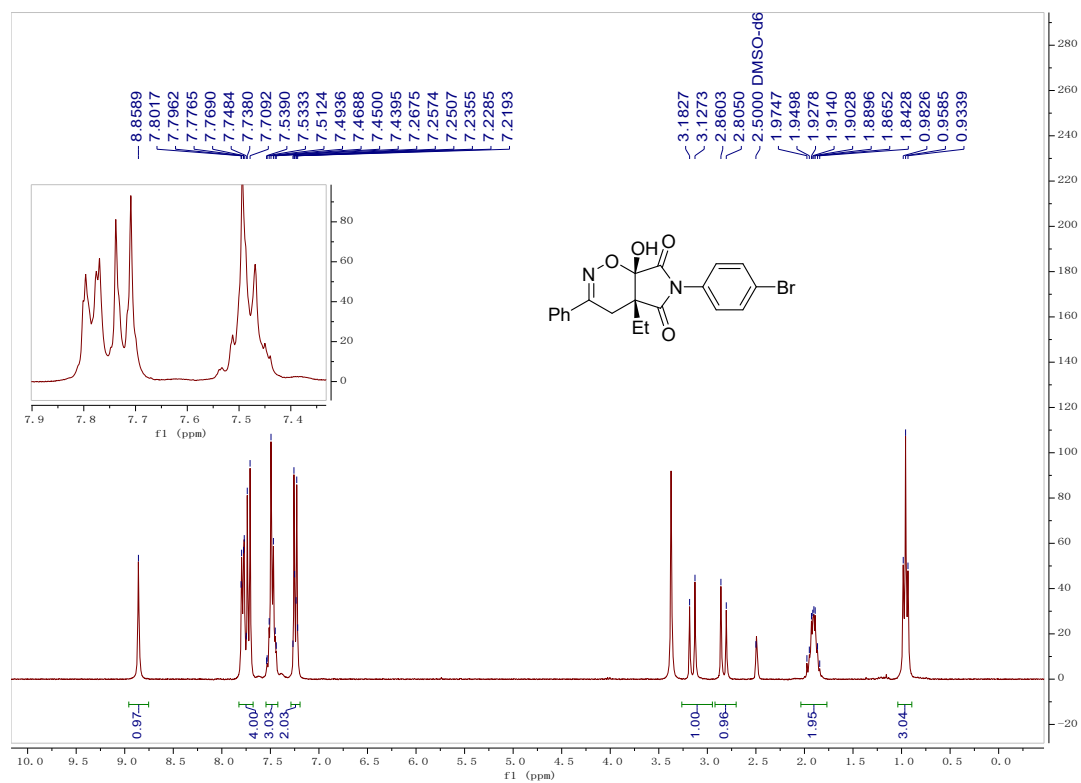**<sup>13</sup>C NMR (75 MHz, DMSO-*d*<sub>6</sub>)**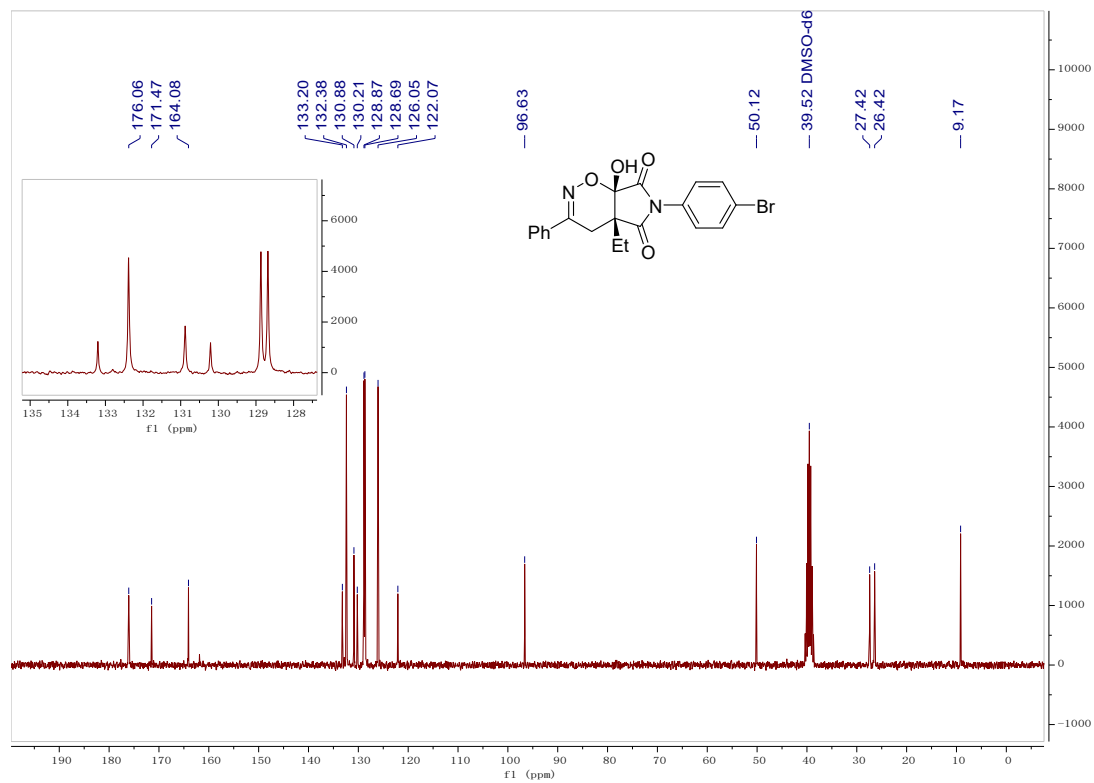

### 3ma

<sup>1</sup>H NMR (300 MHz, DMSO-d<sub>6</sub>)

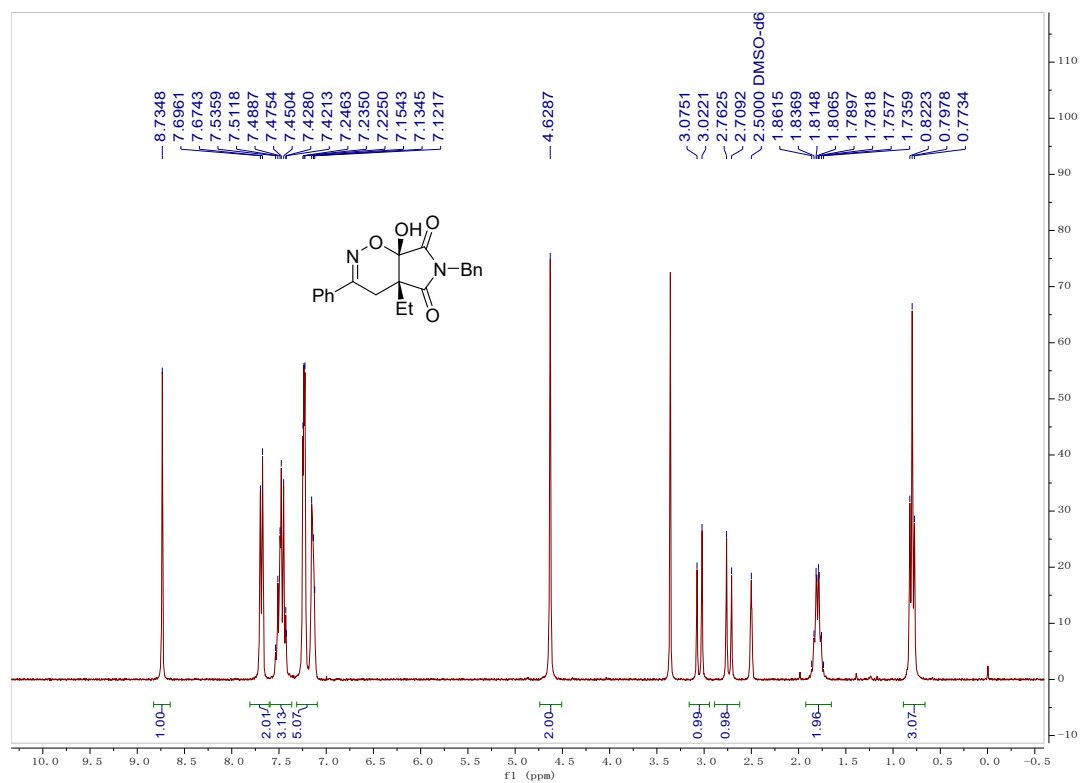

<sup>13</sup>C NMR (75 MHz, DMSO-d<sub>6</sub>)

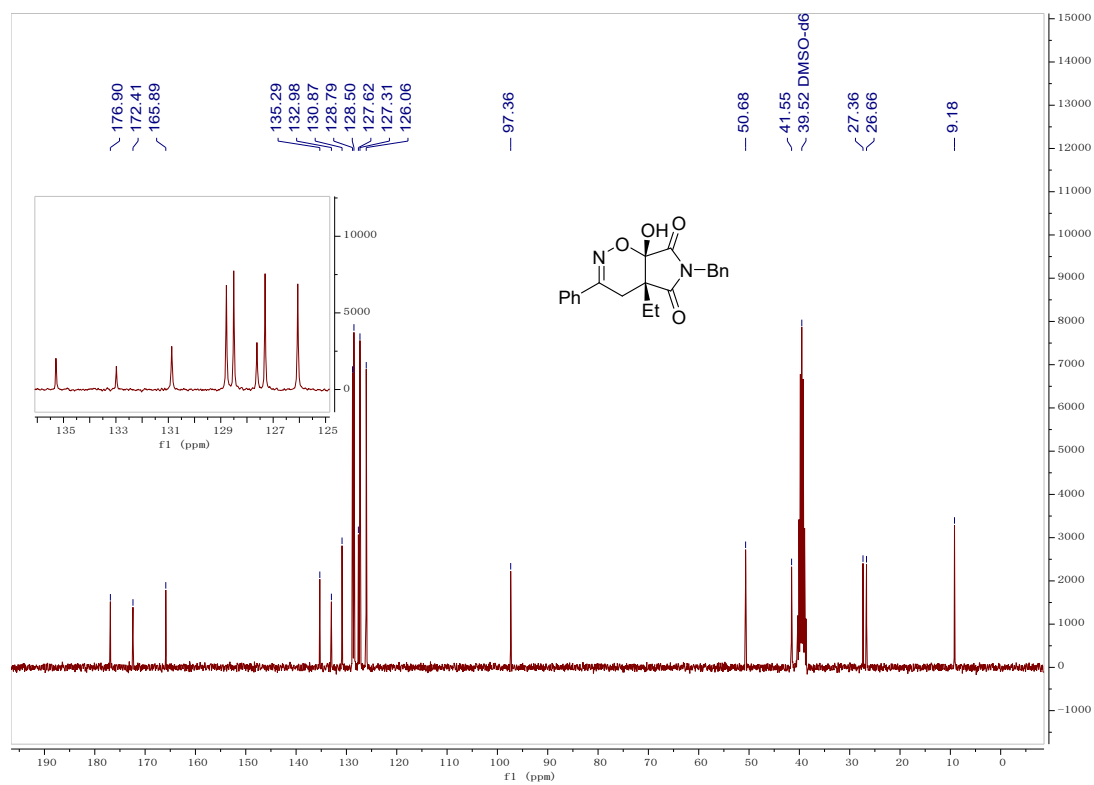

### 3na

<sup>1</sup>H NMR (300 MHz, DMSO-d<sub>6</sub>)

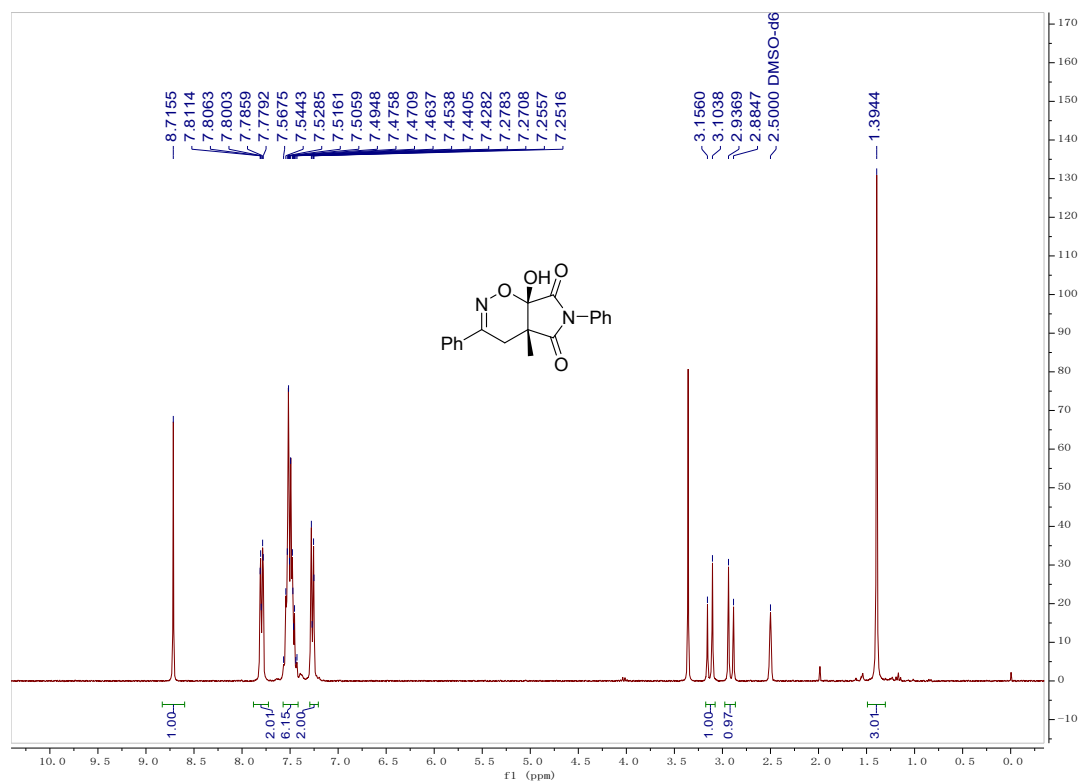

<sup>13</sup>C NMR (75 MHz, DMSO-d<sub>6</sub>)

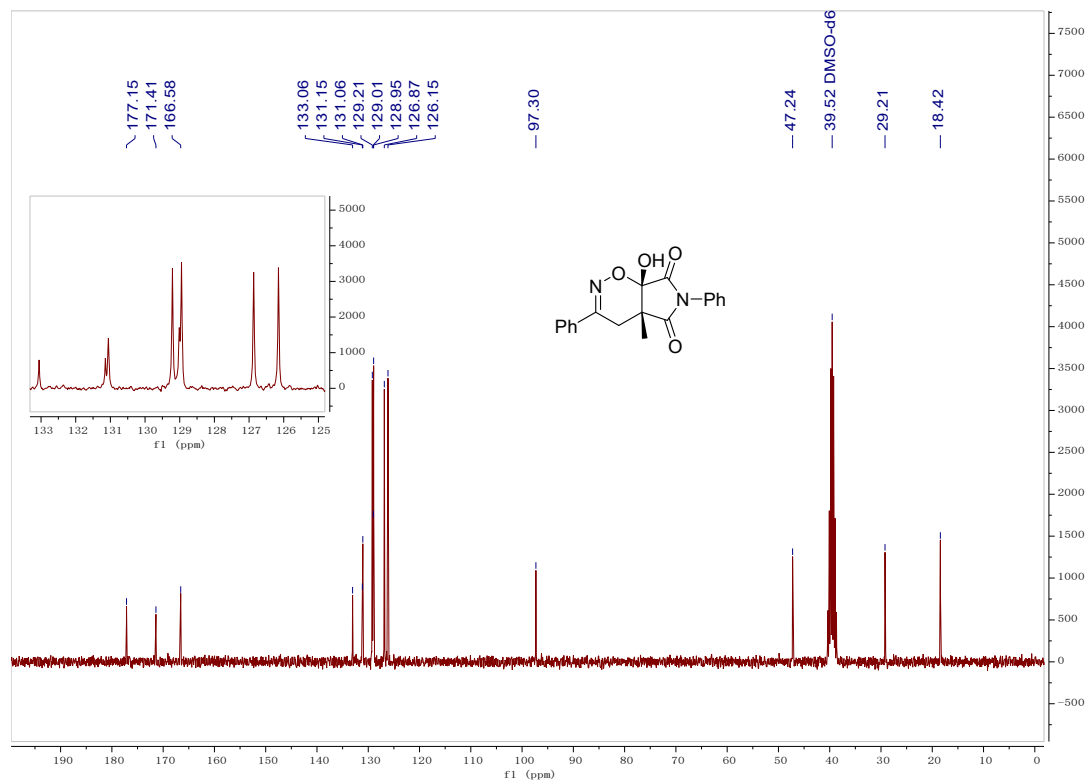

30a

$^1\text{H}$  NMR (300 MHz,  $\text{DMSO-}d_6$ )

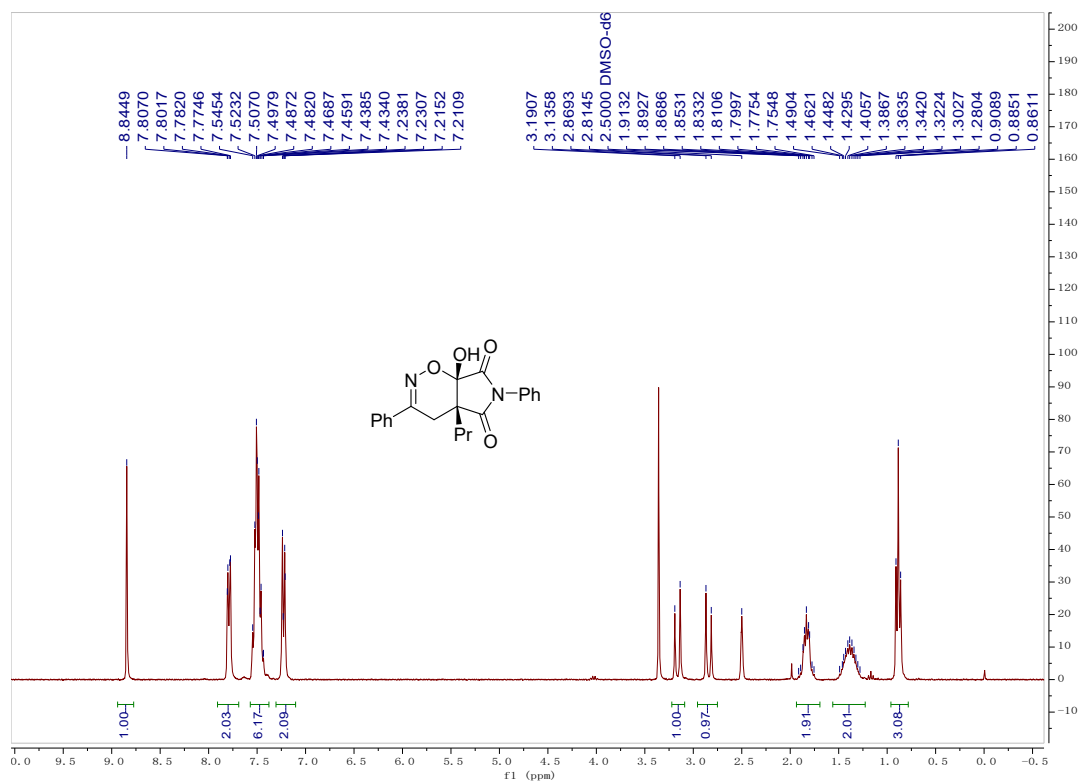

$^{13}\text{C}$  NMR (75 MHz,  $\text{DMSO-}d_6$ )

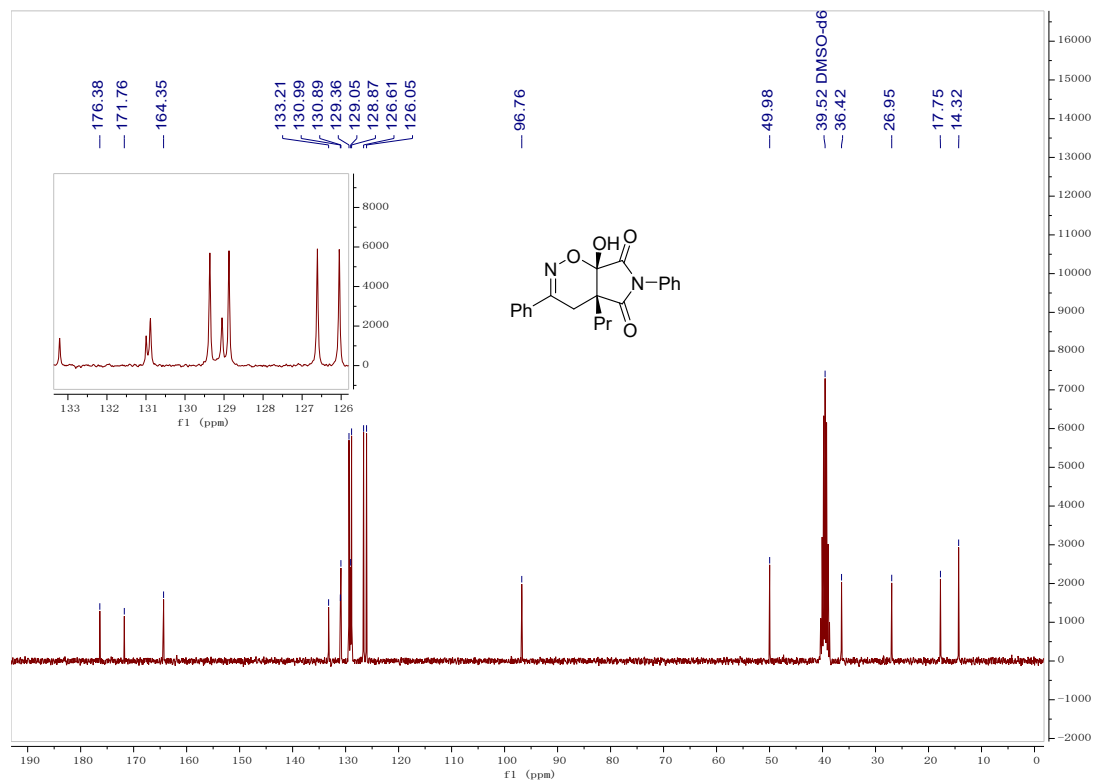

3pa

<sup>1</sup>H NMR (300 MHz, DMSO-d<sub>6</sub>)

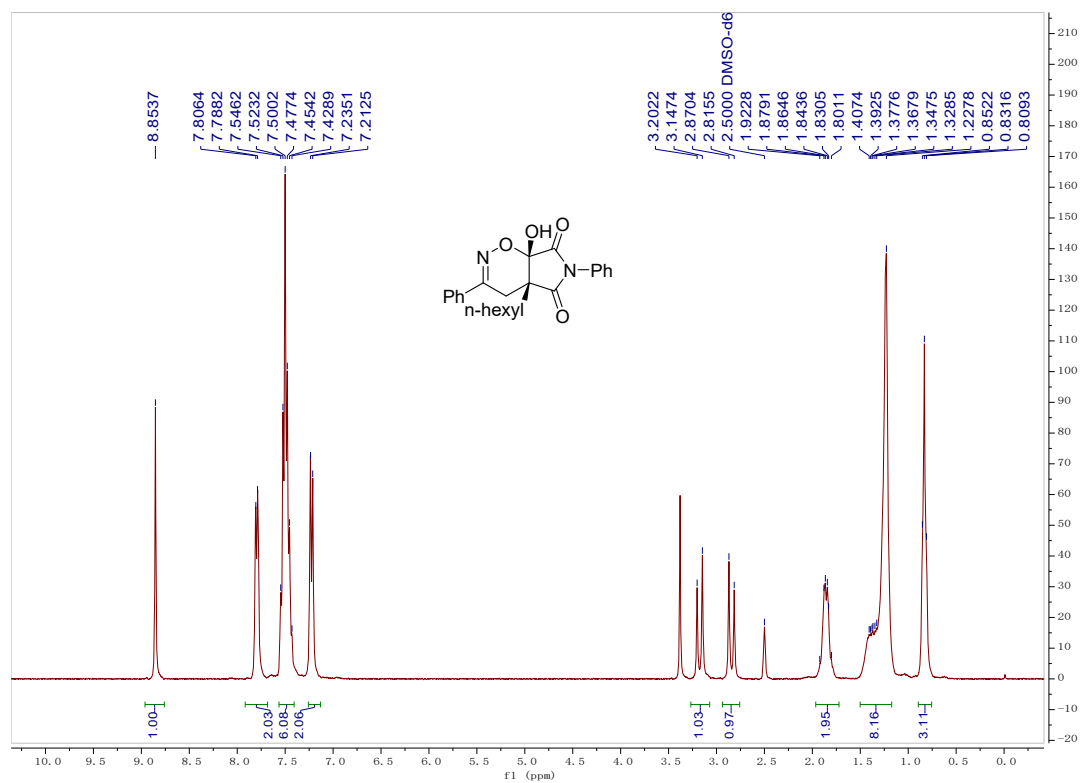

<sup>13</sup>C NMR (75 MHz, DMSO-d<sub>6</sub>)

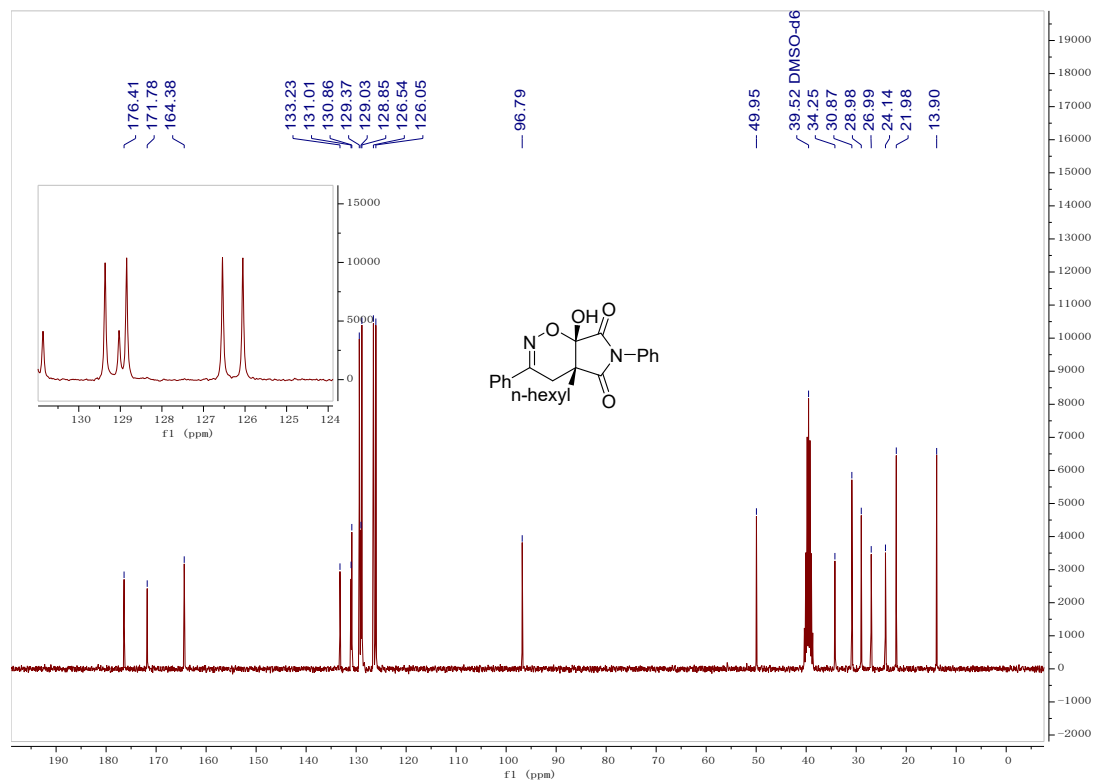



### 3qa

<sup>1</sup>H NMR (300 MHz, DMSO-d<sub>6</sub>)

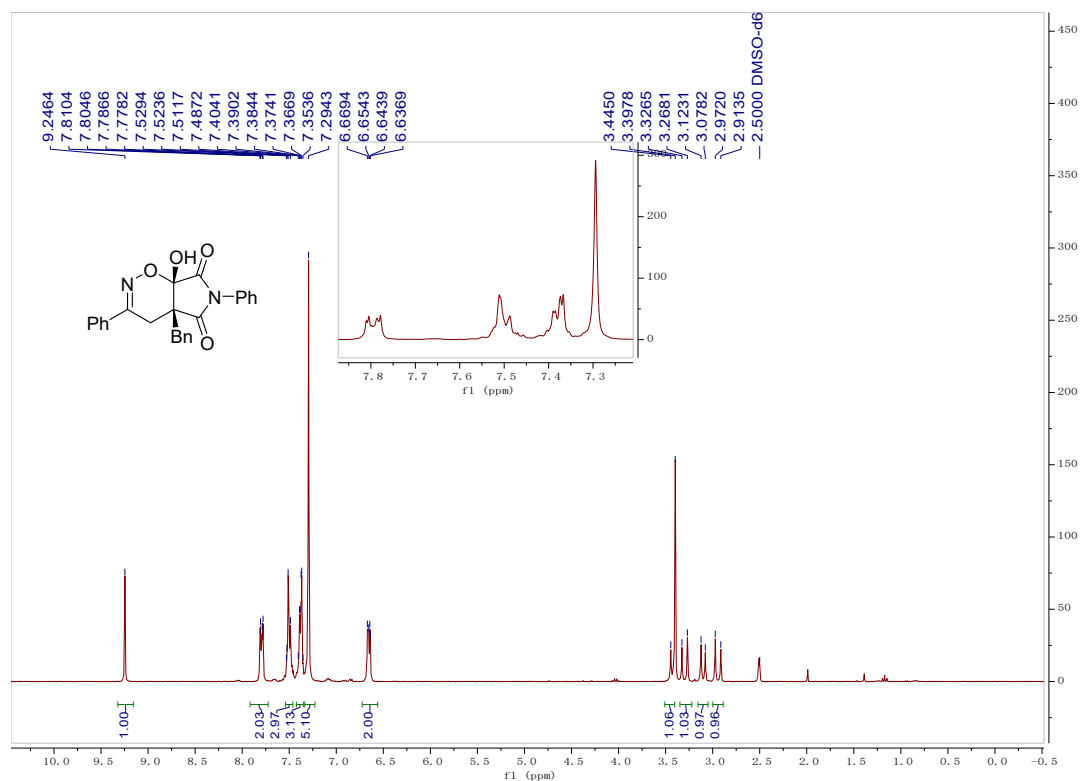

<sup>13</sup>C NMR (75 MHz, DMSO-d<sub>6</sub>)

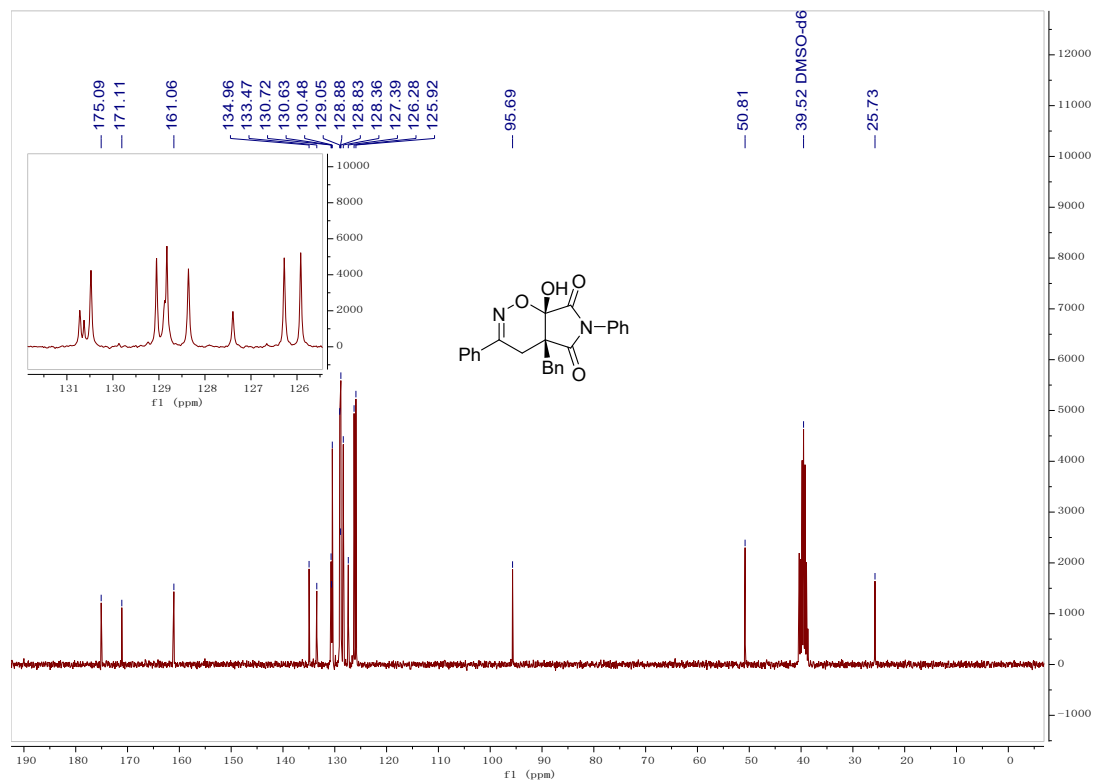

### 3ra

<sup>1</sup>H NMR (300 MHz, DMSO-d<sub>6</sub>)

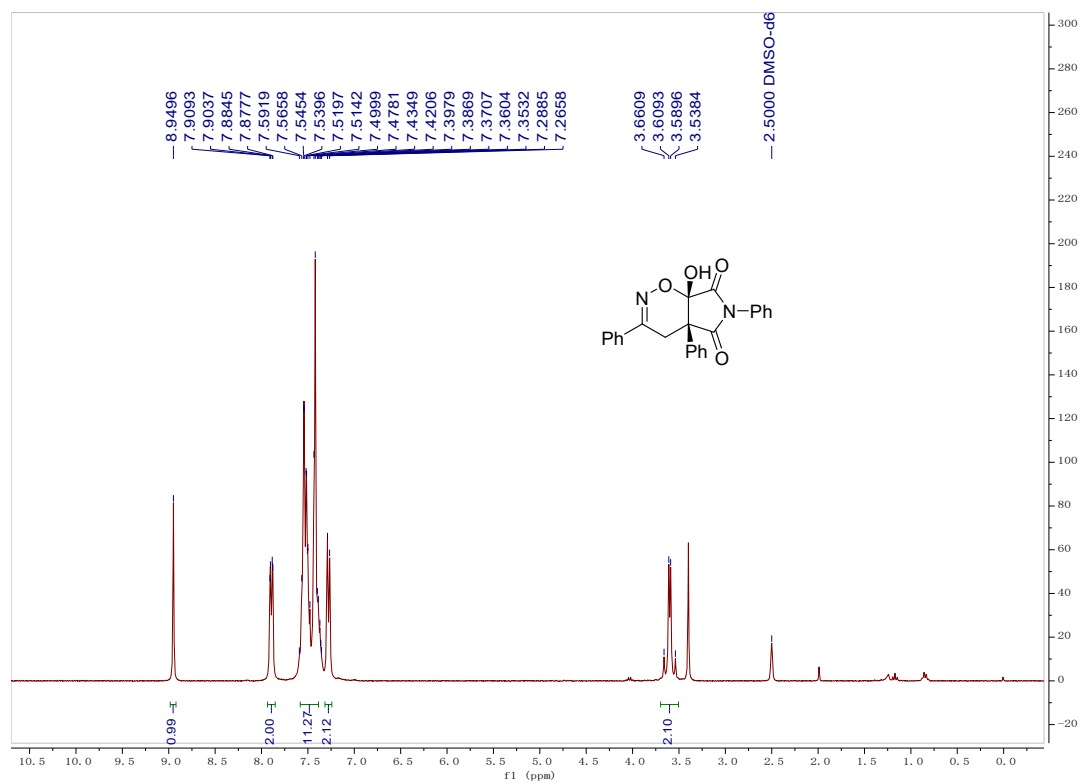

<sup>13</sup>C NMR (75 MHz, DMSO-d<sub>6</sub>)

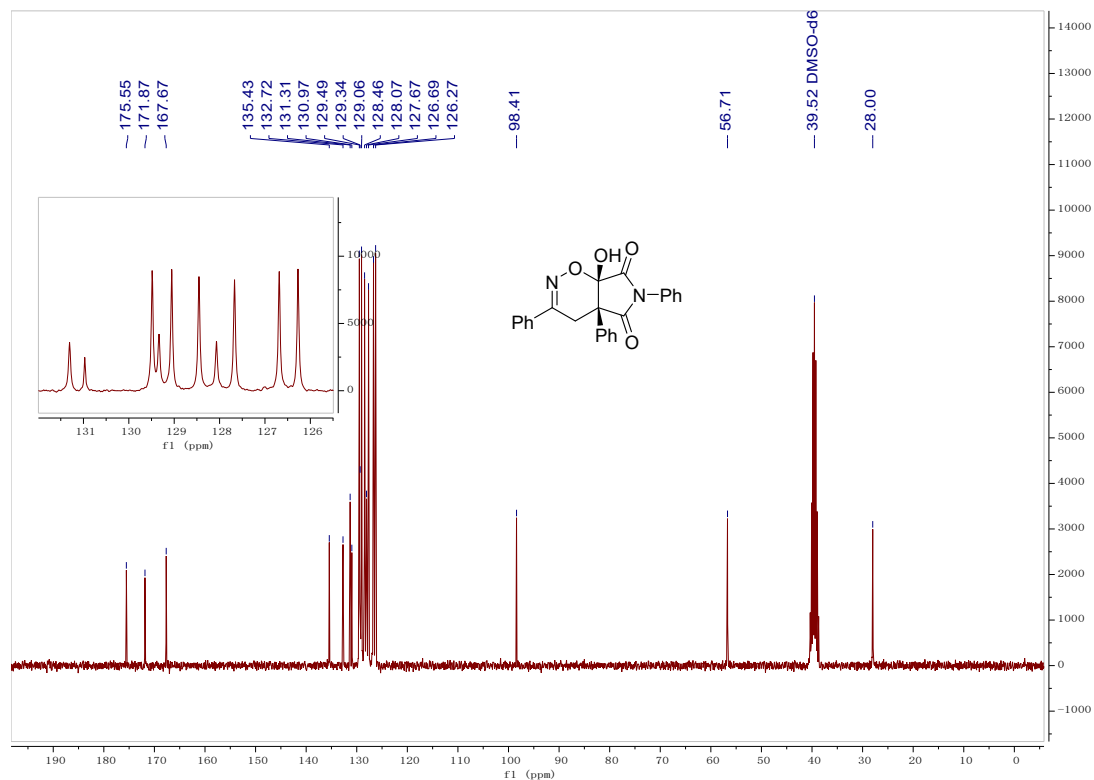

**3sa****<sup>1</sup>H NMR (300 MHz, DMSO-*d*<sub>6</sub>)**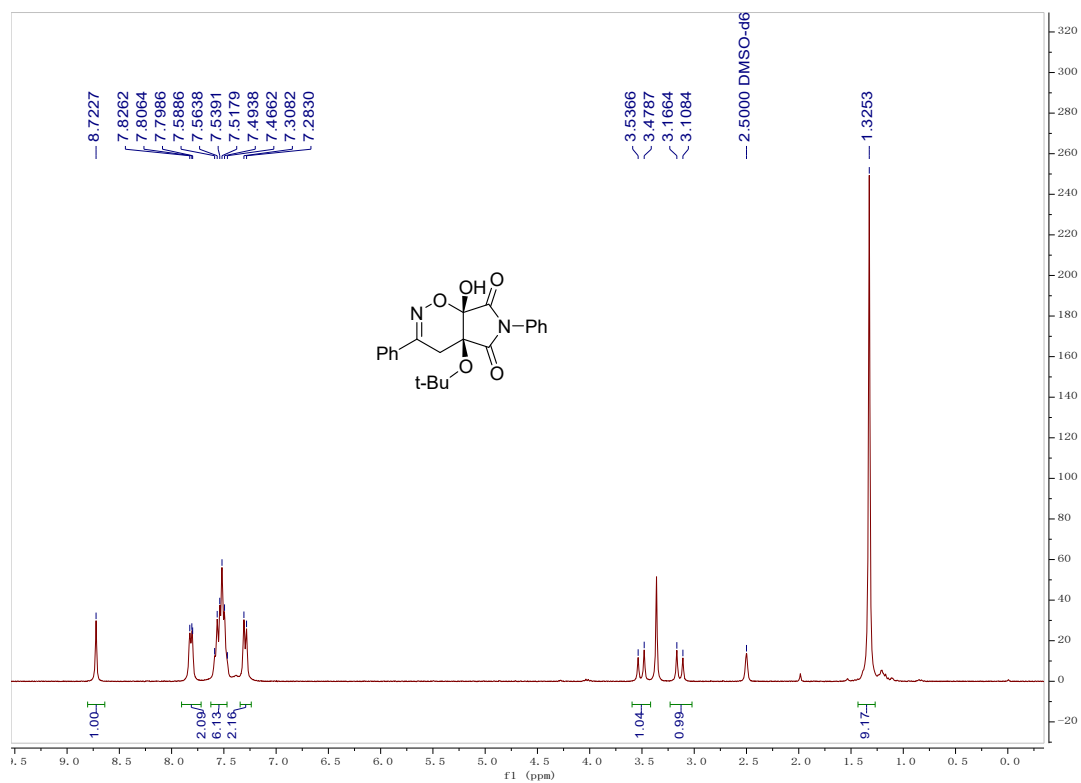**<sup>13</sup>C NMR (75 MHz, DMSO-*d*<sub>6</sub>)**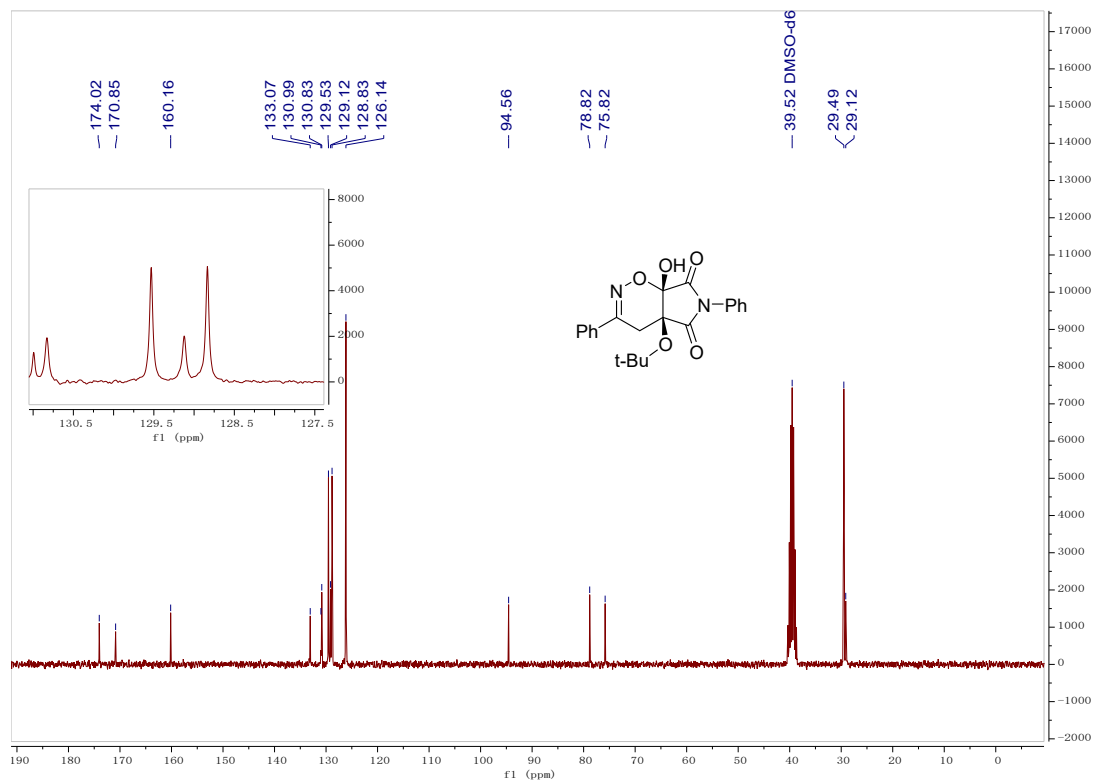

**3ab****<sup>1</sup>H NMR (300 MHz, DMSO-*d*<sub>6</sub>)**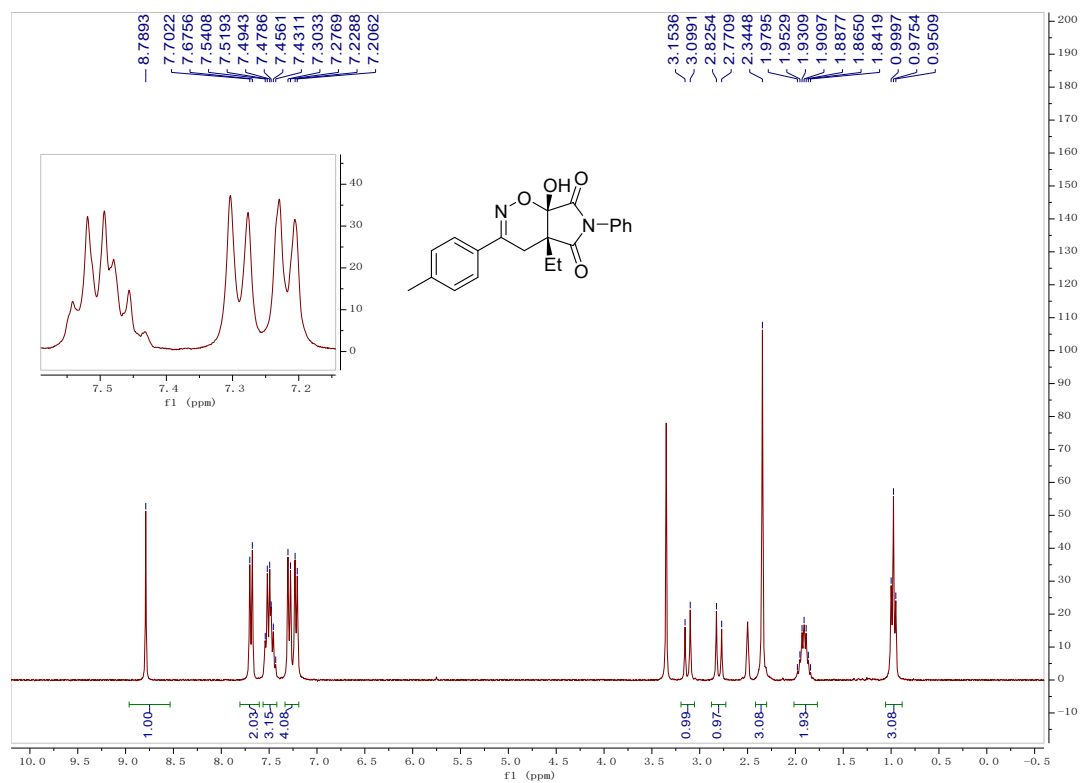**<sup>13</sup>C NMR (75 MHz, DMSO-*d*<sub>6</sub>)**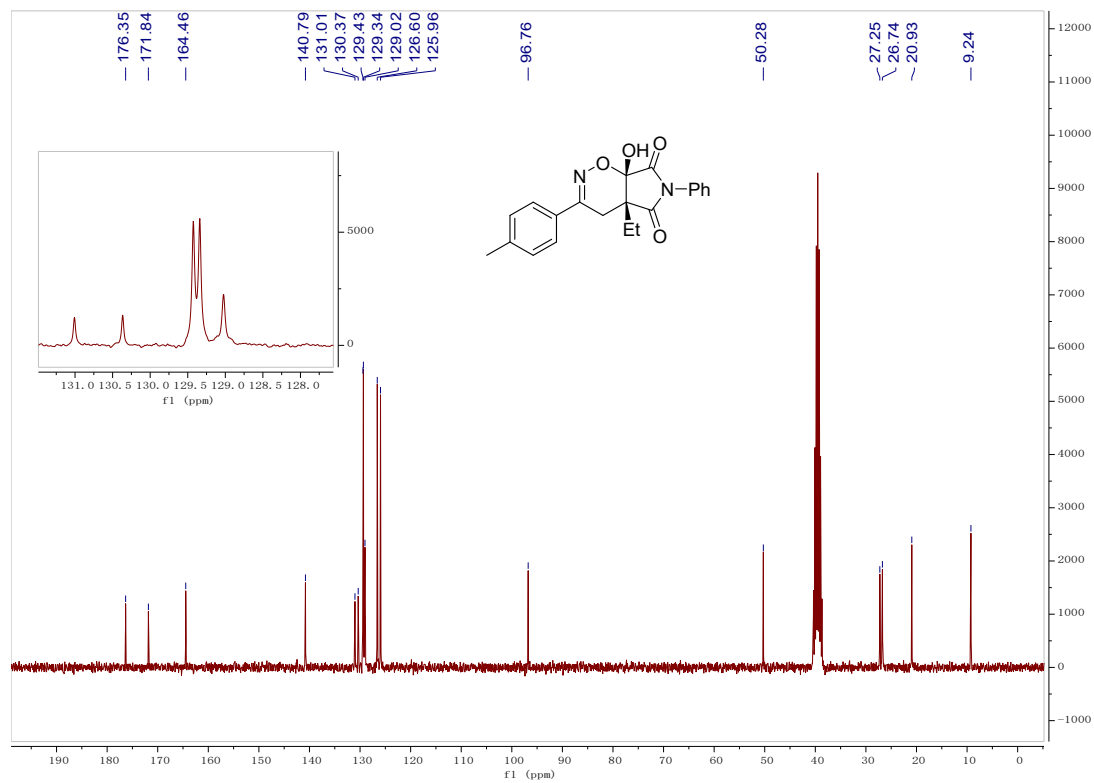

3ac

<sup>1</sup>H NMR (300 MHz, DMSO-d<sub>6</sub>)

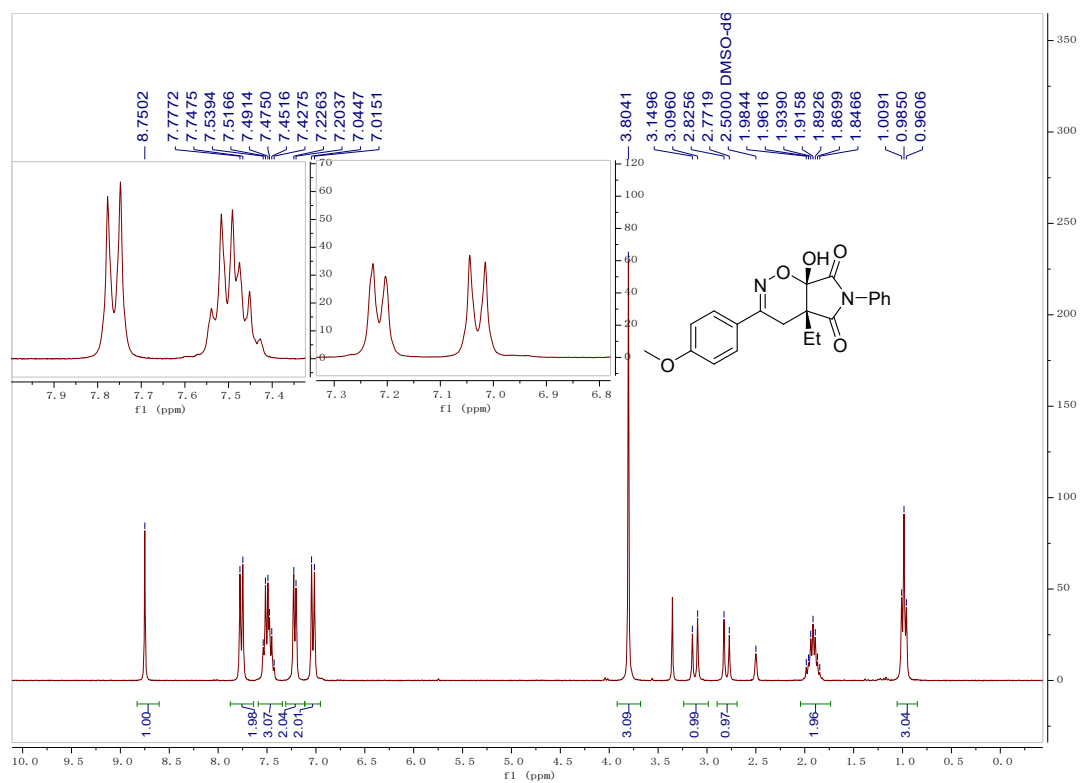

<sup>13</sup>C NMR (75 MHz, DMSO-d<sub>6</sub>)

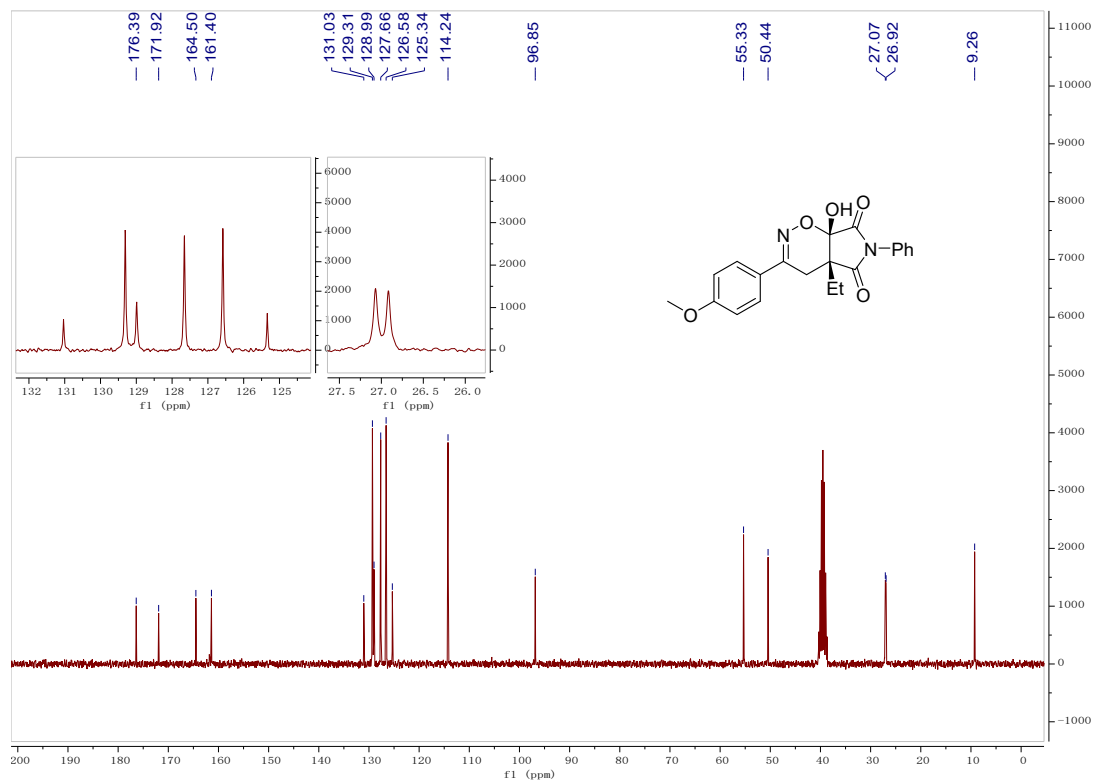

3ad

<sup>1</sup>H NMR (300 MHz, DMSO-d<sub>6</sub>)

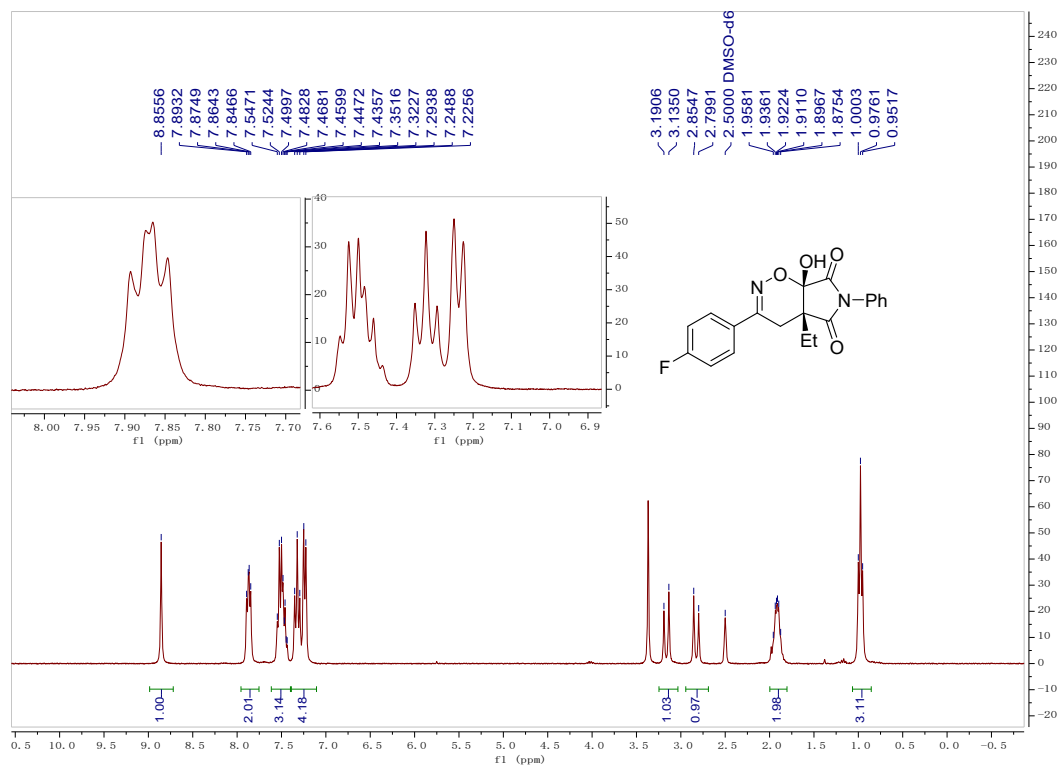

<sup>13</sup>C NMR (75 MHz, DMSO-d<sub>6</sub>)

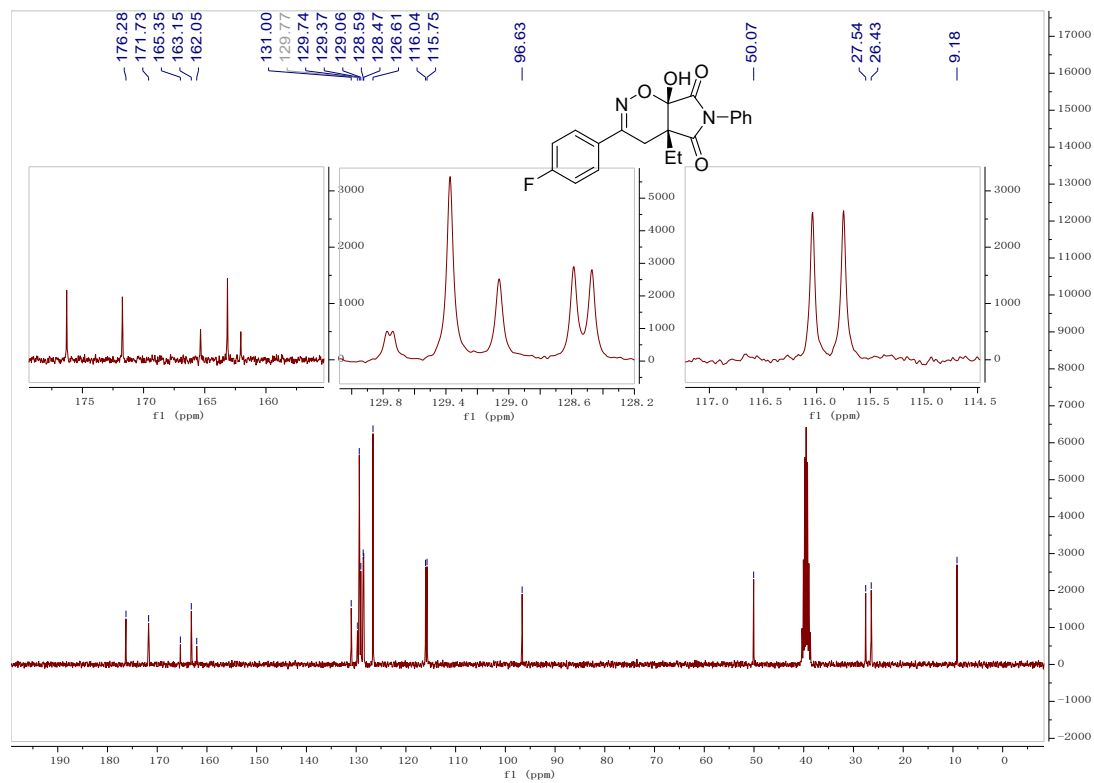

3ae

<sup>1</sup>H NMR (300 MHz, DMSO-d<sub>6</sub>)

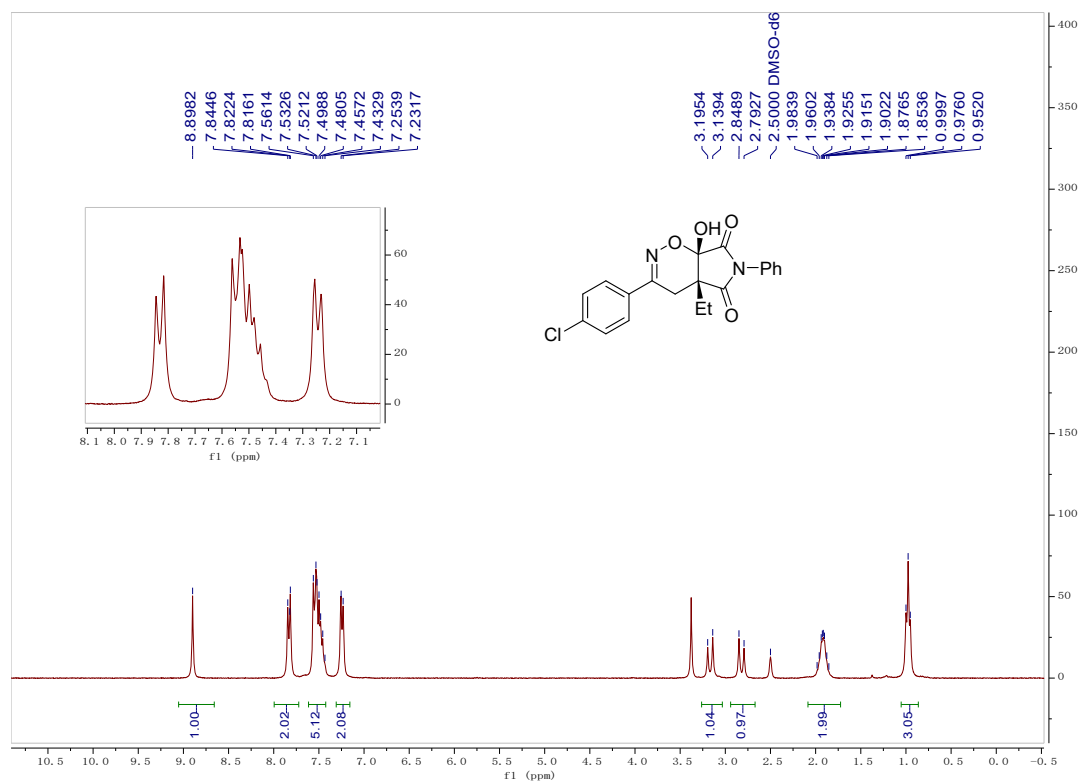

<sup>13</sup>C NMR (75 MHz, DMSO-d<sub>6</sub>)

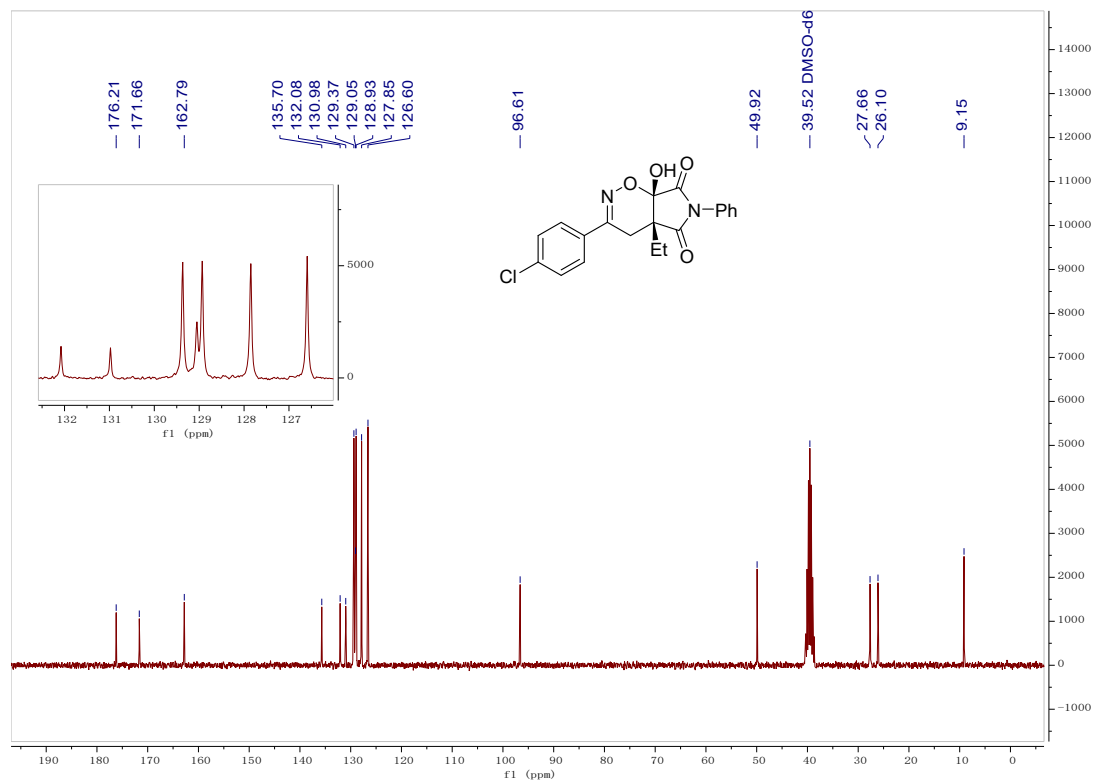

3af

$^1\text{H}$  NMR (300 MHz,  $\text{DMSO-}d_6$ )

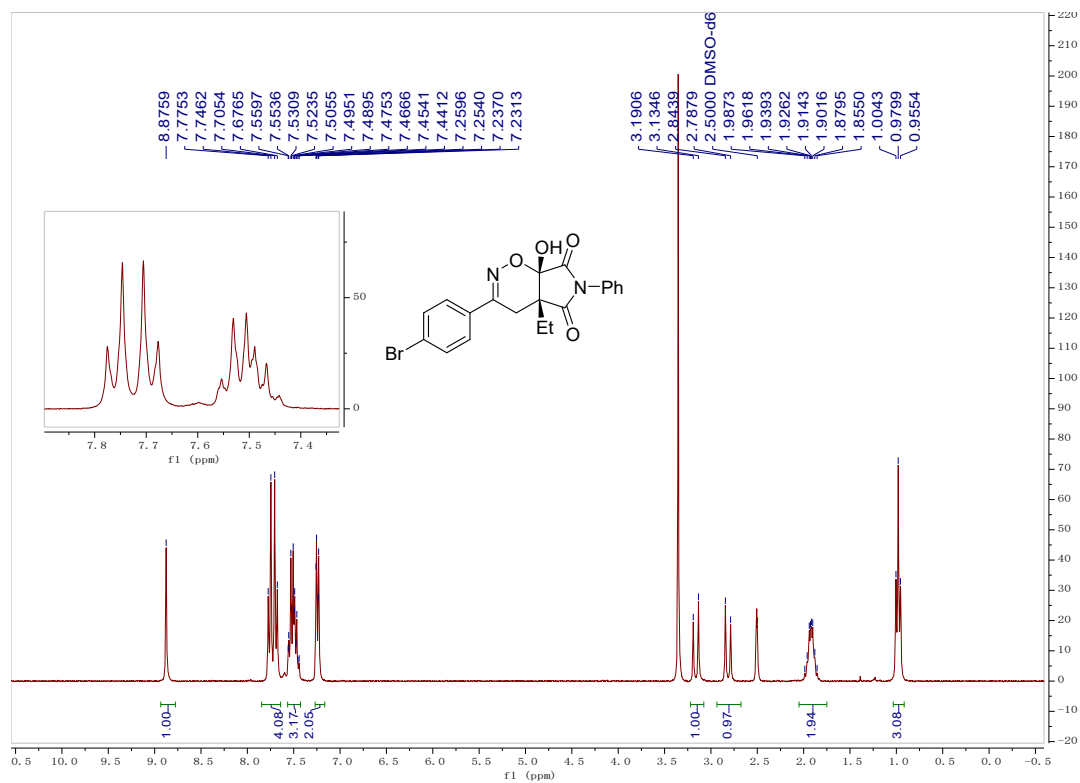

$^{13}\text{C}$  NMR (75 MHz,  $\text{DMSO-}d_6$ )

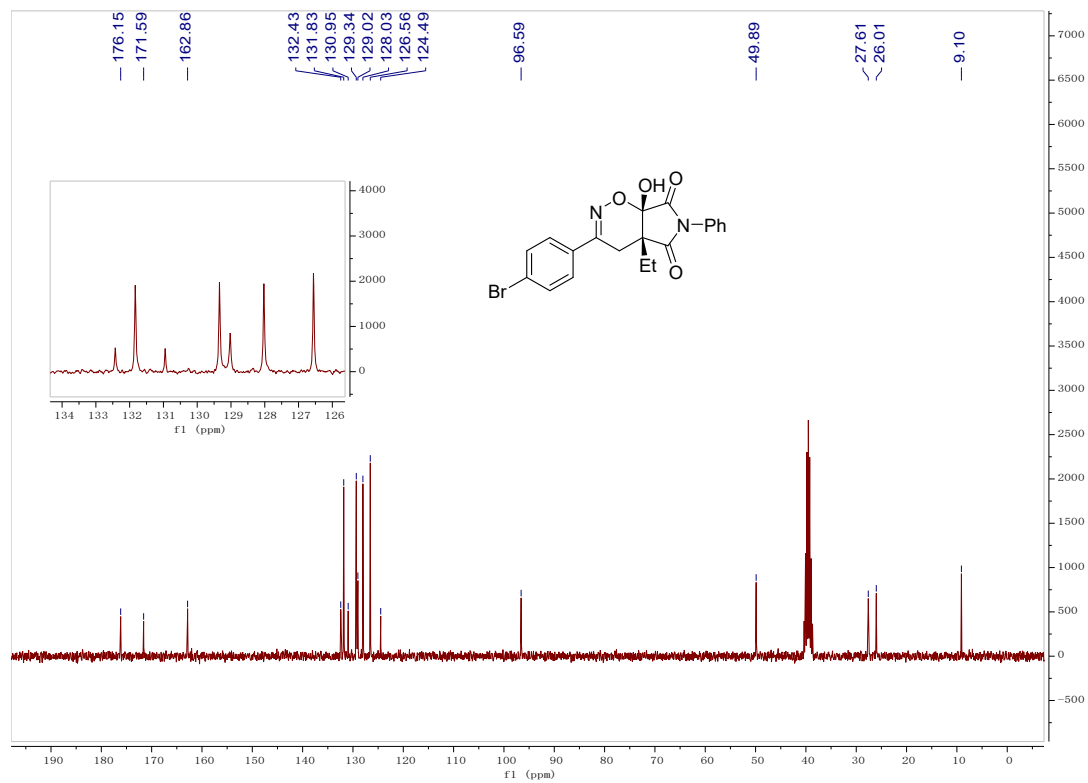



3ag

$^1\text{H}$  NMR (300 MHz,  $\text{DMSO-}d_6$ )

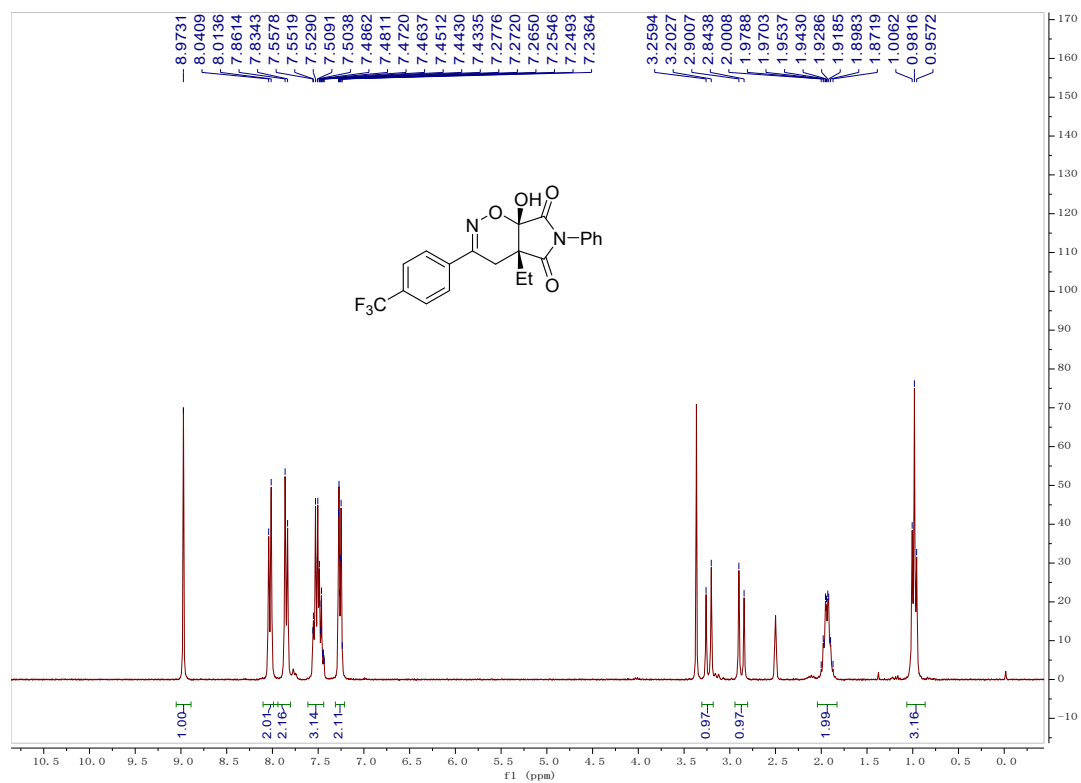

$^{13}\text{C}$  NMR (75 MHz,  $\text{DMSO-}d_6$ )

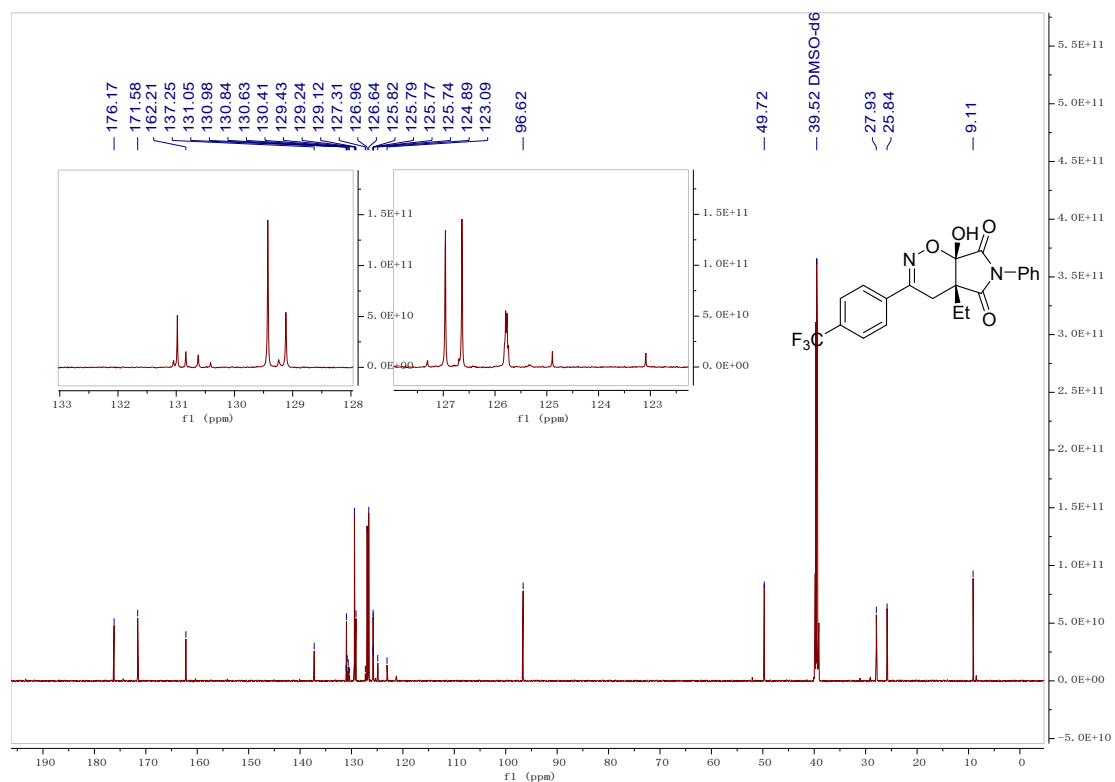

3ah

<sup>1</sup>H NMR (300 MHz, DMSO-d<sub>6</sub>)

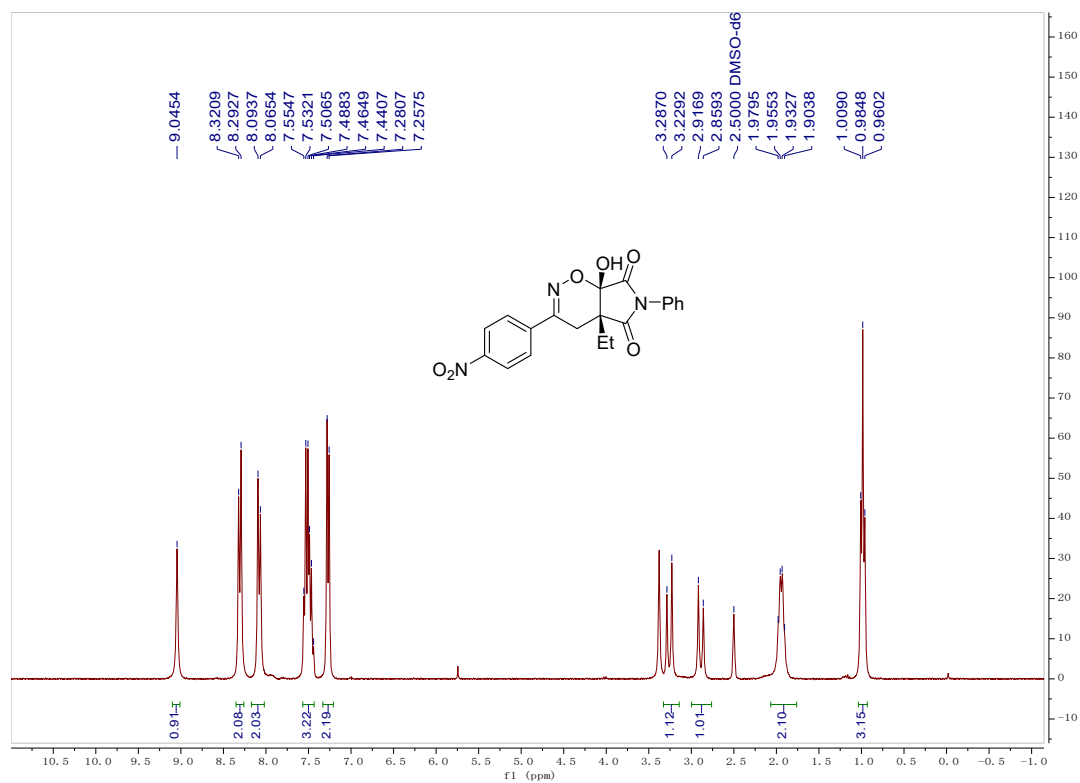

<sup>13</sup>C NMR (75 MHz, DMSO-d<sub>6</sub>)

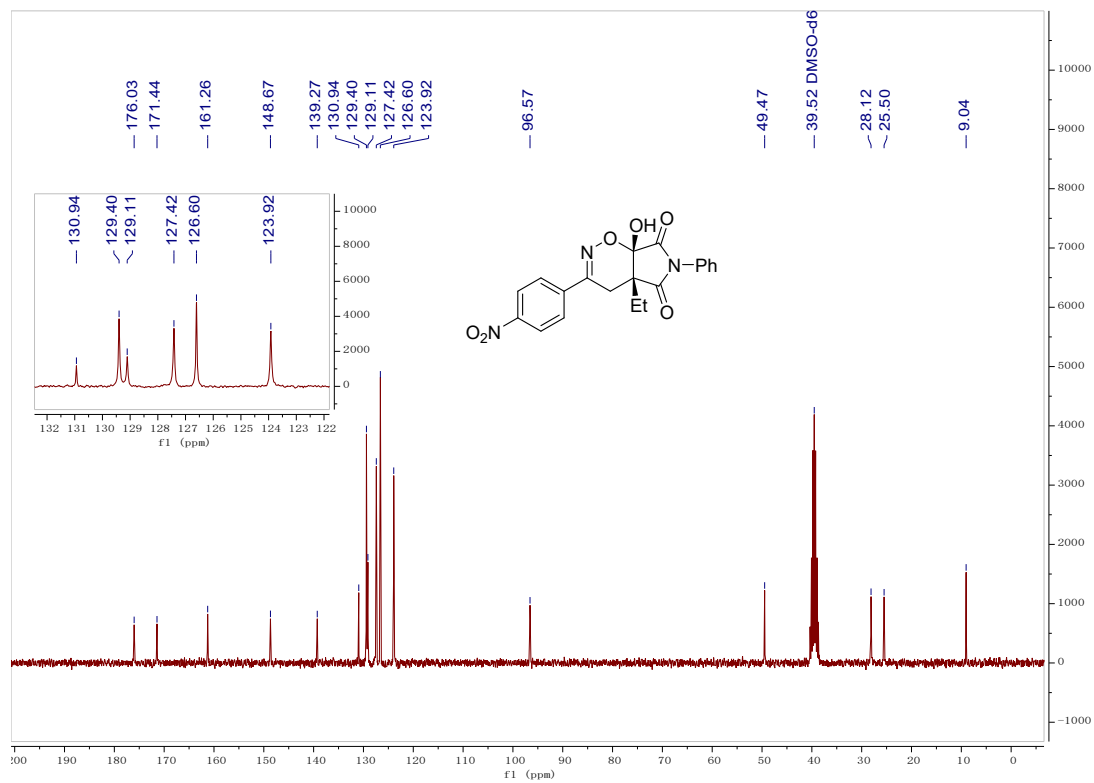

3ai

<sup>1</sup>H NMR (300 MHz, DMSO-d<sub>6</sub>)

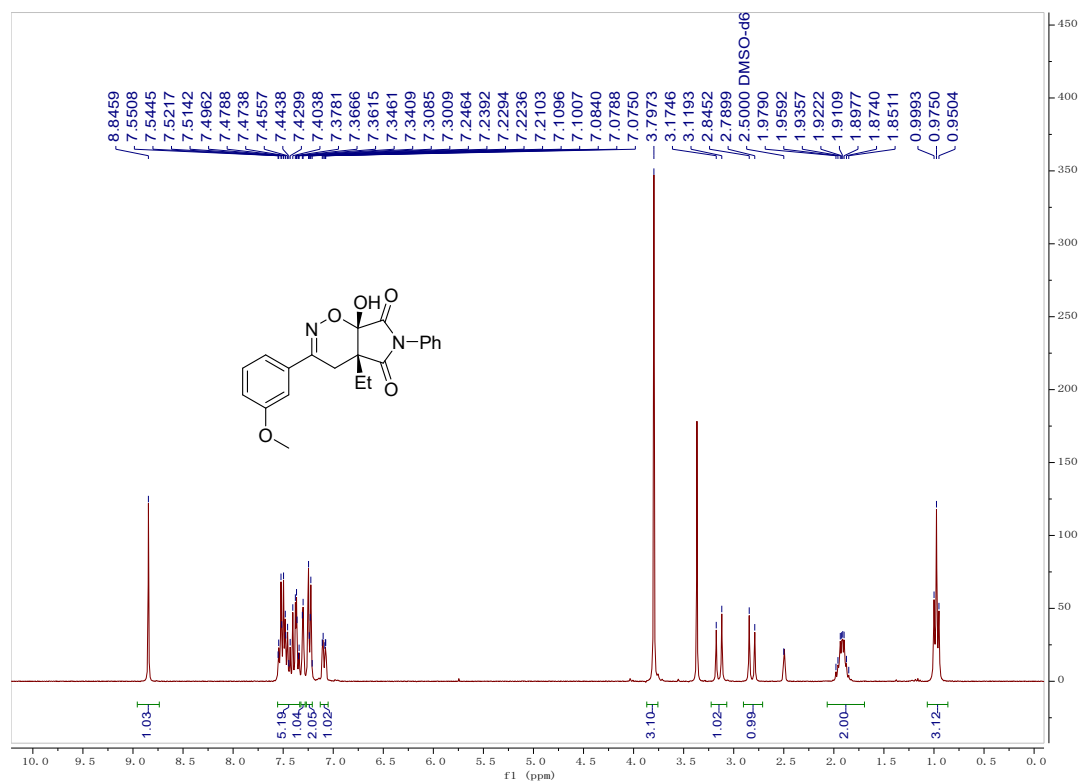

<sup>13</sup>C NMR (75 MHz, DMSO-d<sub>6</sub>)

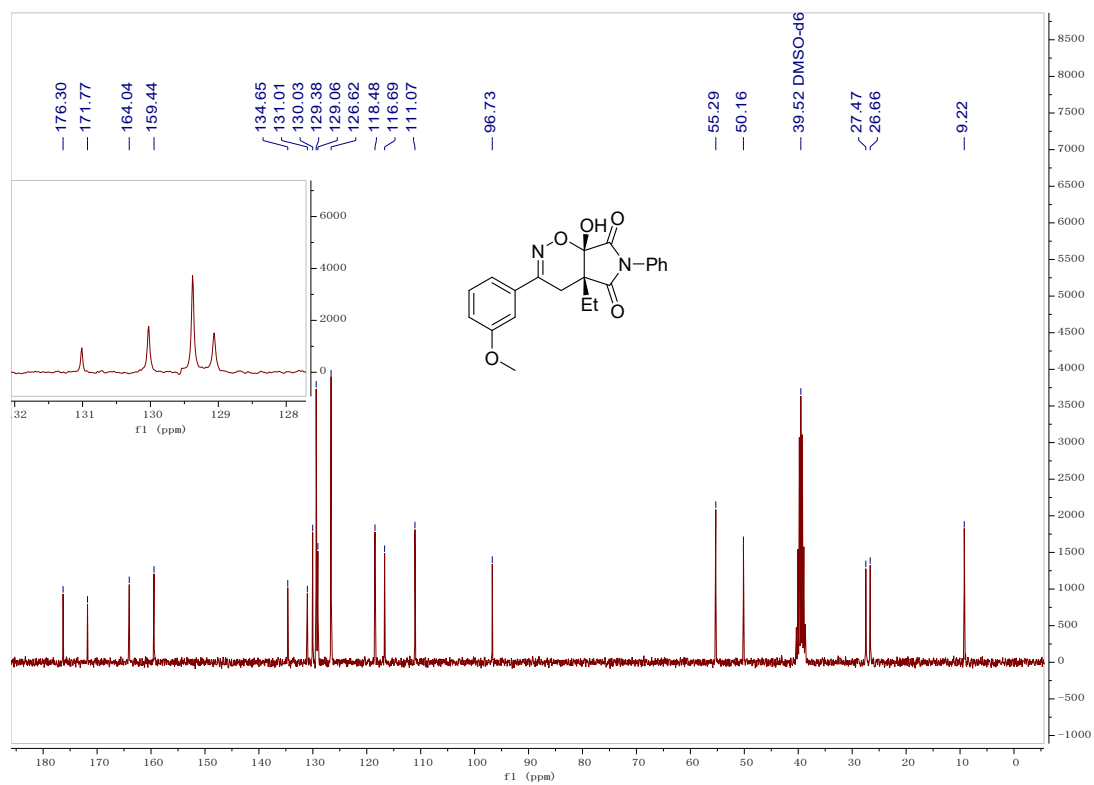

3aj

$^1\text{H}$  NMR (300 MHz,  $\text{DMSO-}d_6$ )

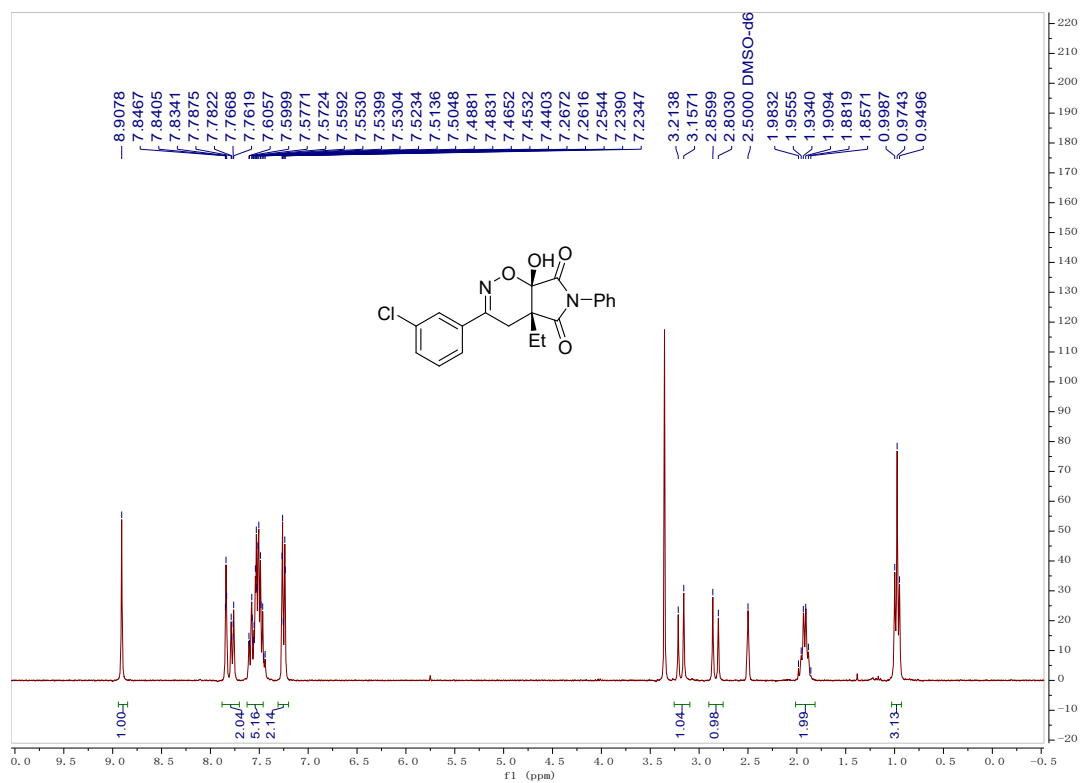

$^{13}\text{C}$  NMR (75 MHz,  $\text{DMSO-}d_6$ )

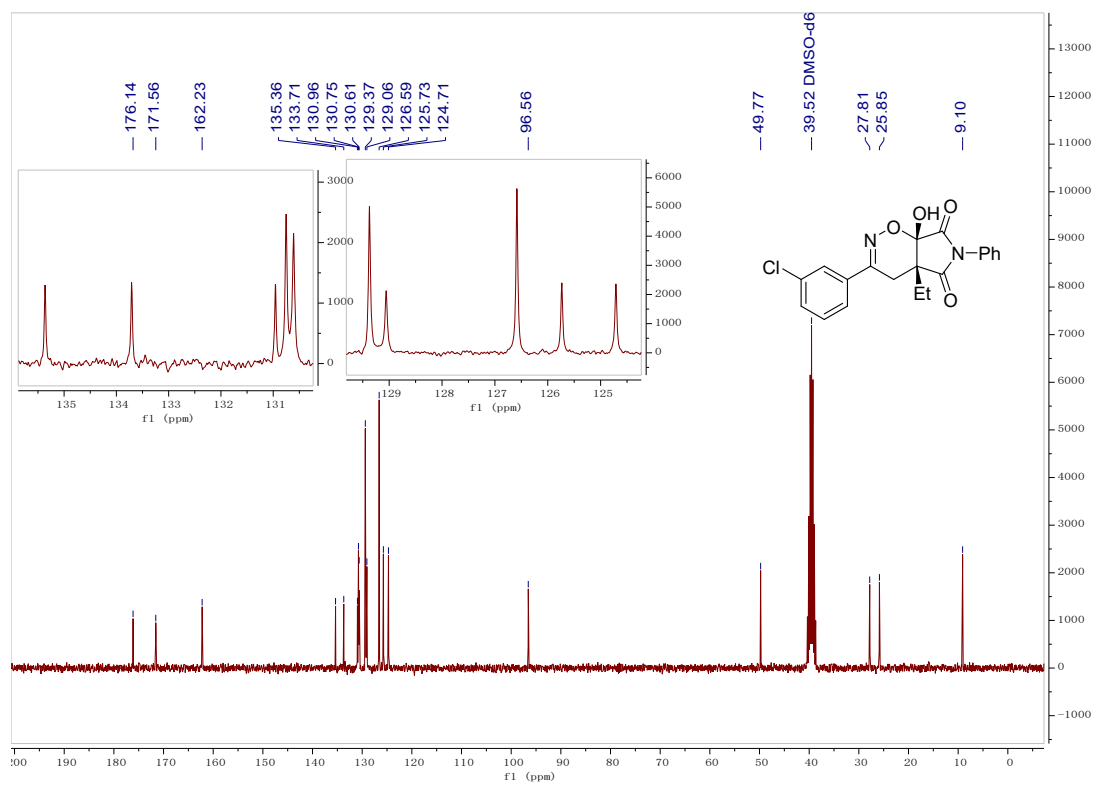

3ak

$^1\text{H}$  NMR (300 MHz, DMSO- $d_6$ )

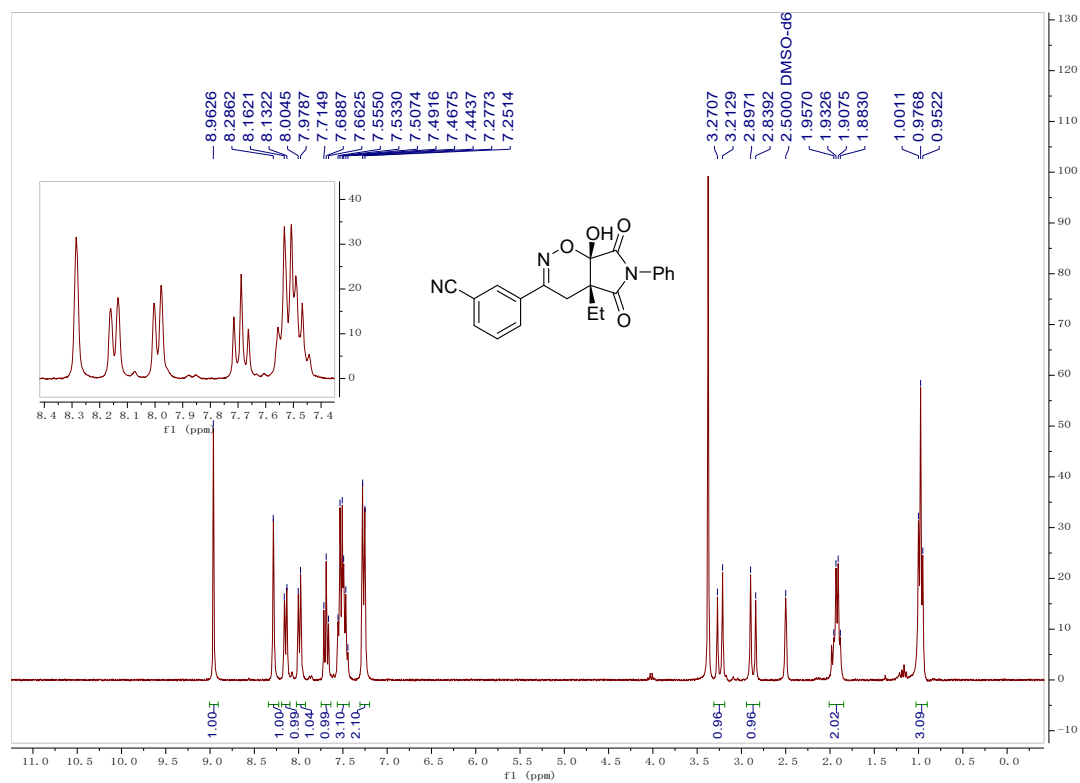

$^{13}\text{C}$  NMR (75 MHz, DMSO- $d_6$ )

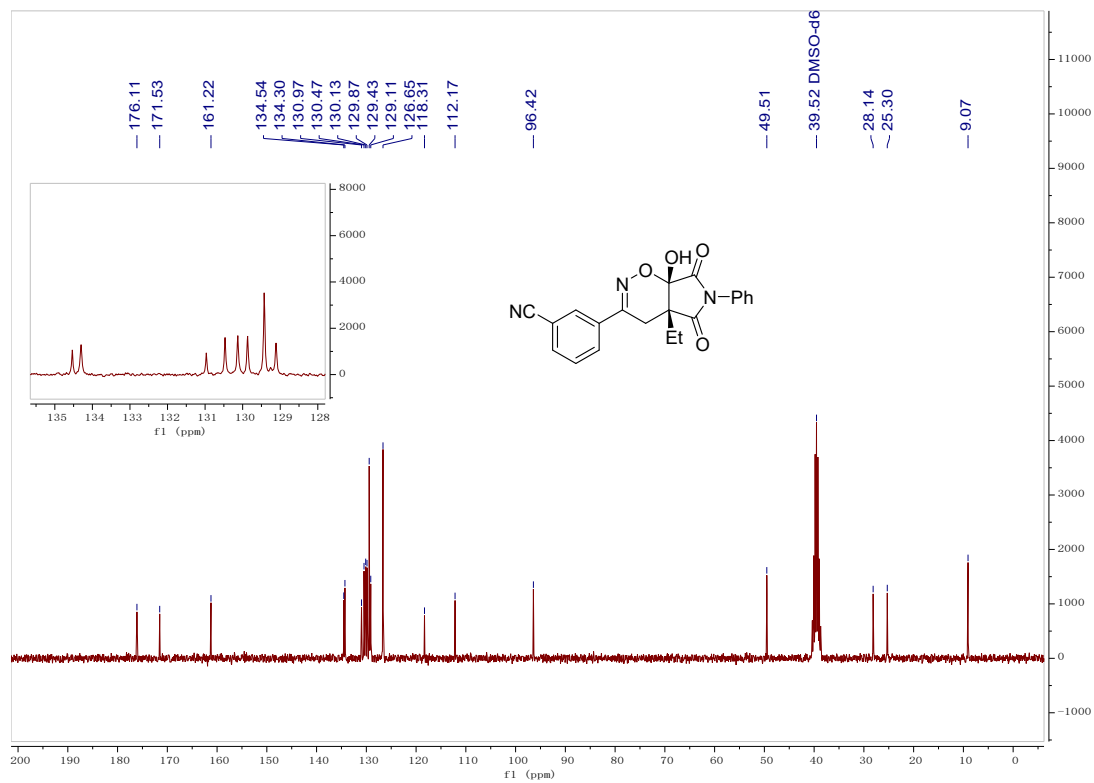

3aI

<sup>1</sup>H NMR (300 MHz, DMSO-d<sub>6</sub>)

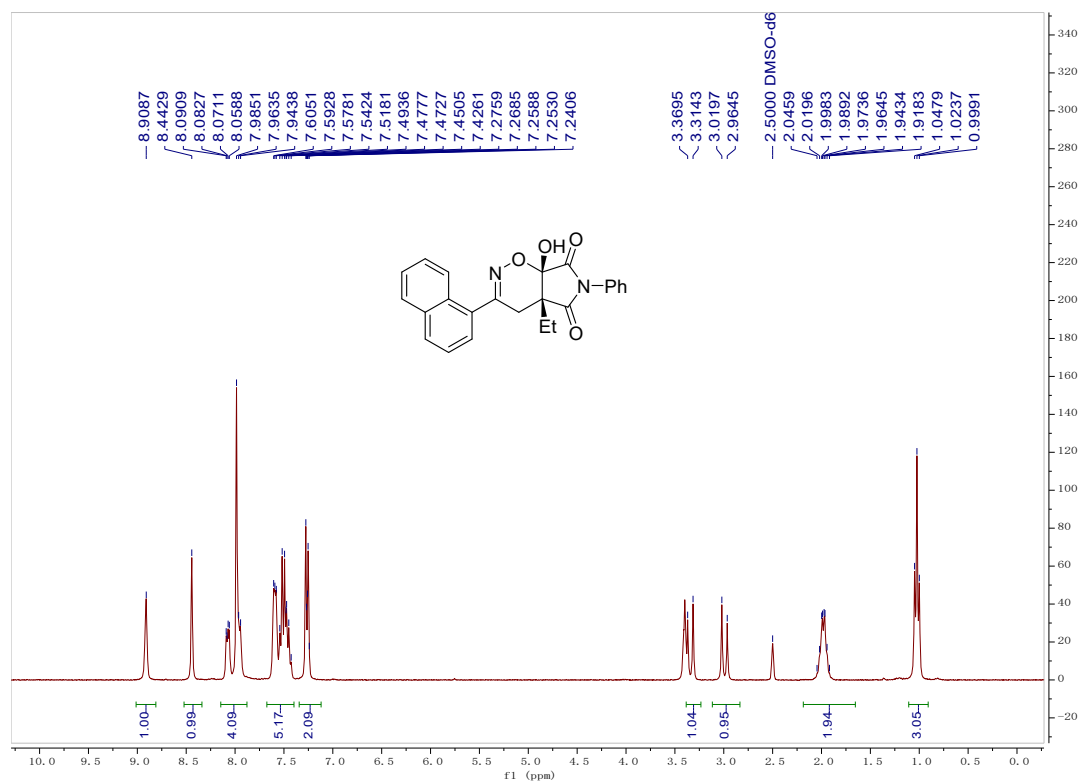

<sup>13</sup>C NMR (75 MHz, DMSO-d<sub>6</sub>)

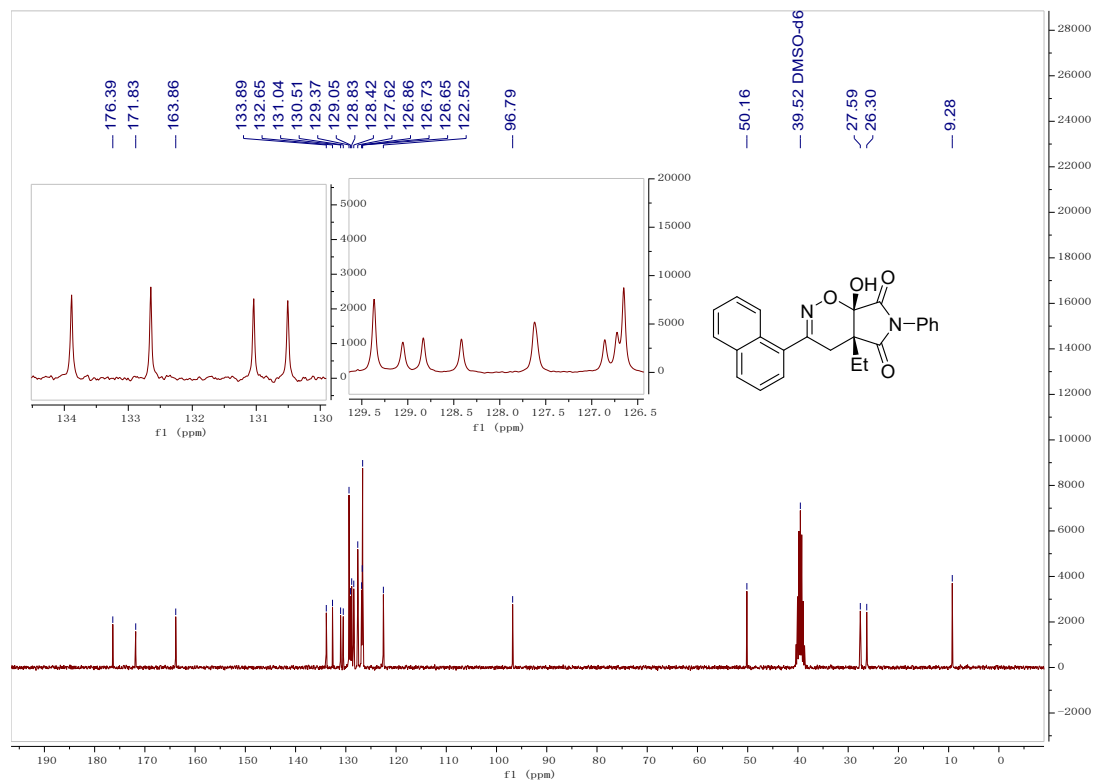

**3am**<sup>1</sup>H NMR (300 MHz, DMSO-*d*<sub>6</sub>)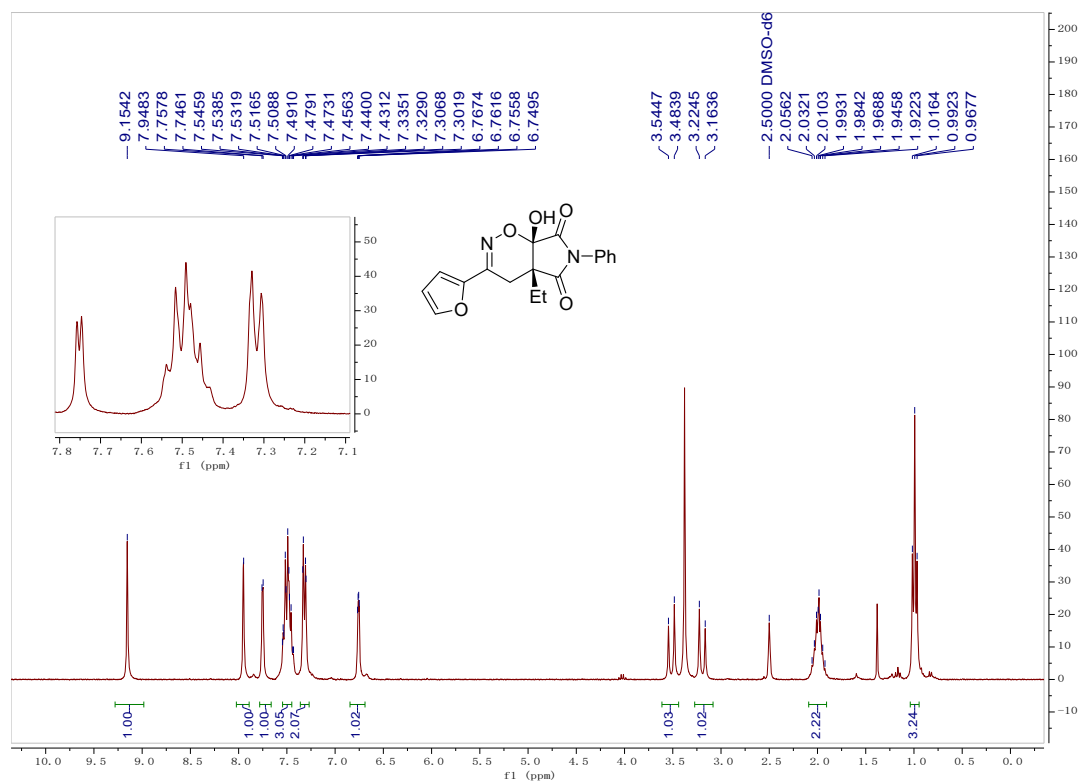<sup>13</sup>C NMR (75 MHz, DMSO-*d*<sub>6</sub>)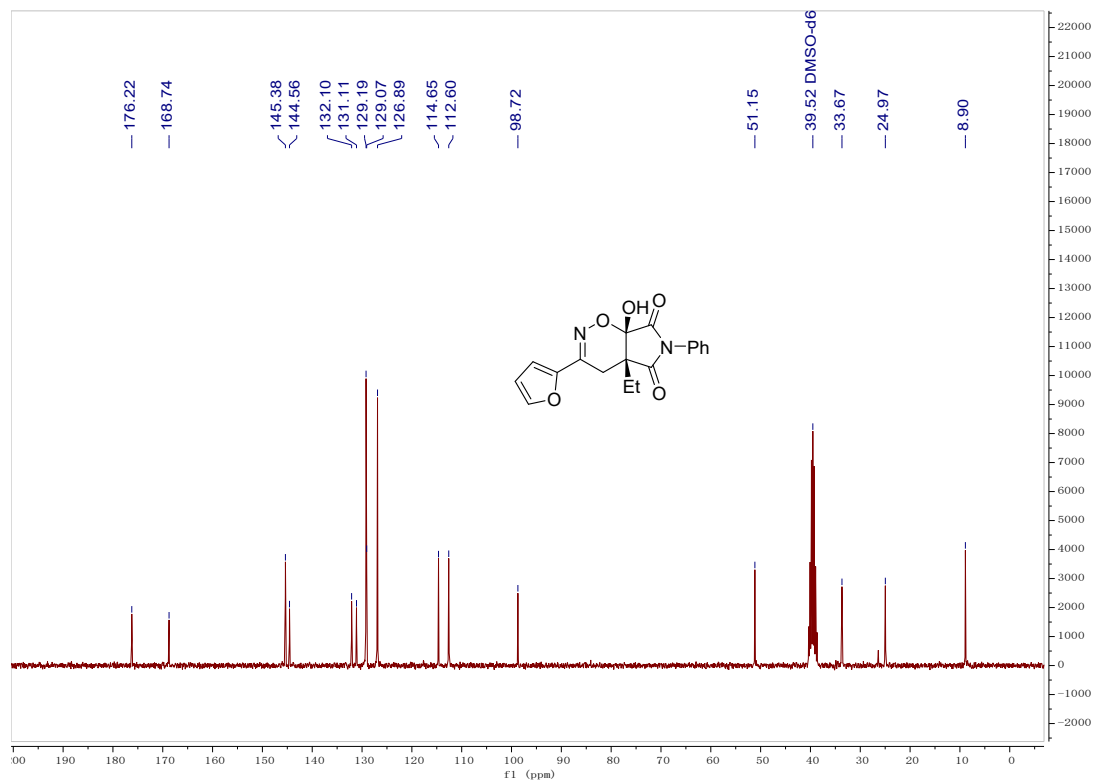

3am'

<sup>1</sup>H NMR (300 MHz, DMSO-d<sub>6</sub>)

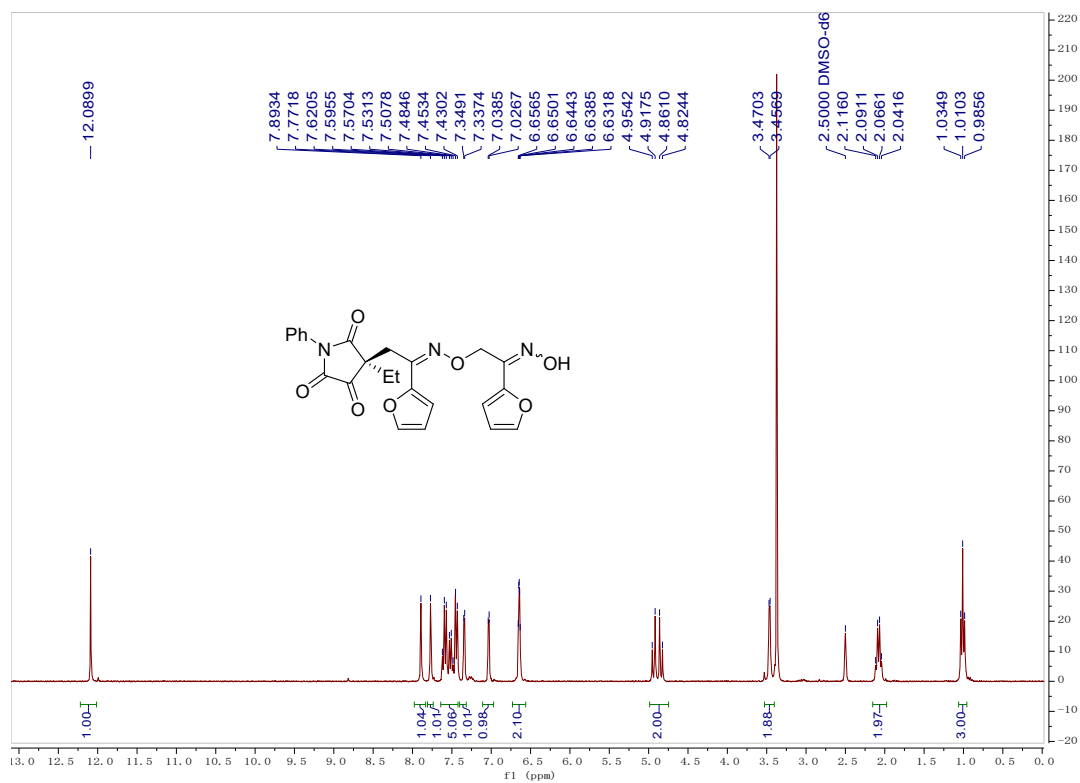

<sup>13</sup>C NMR (75 MHz, DMSO-d<sub>6</sub>)

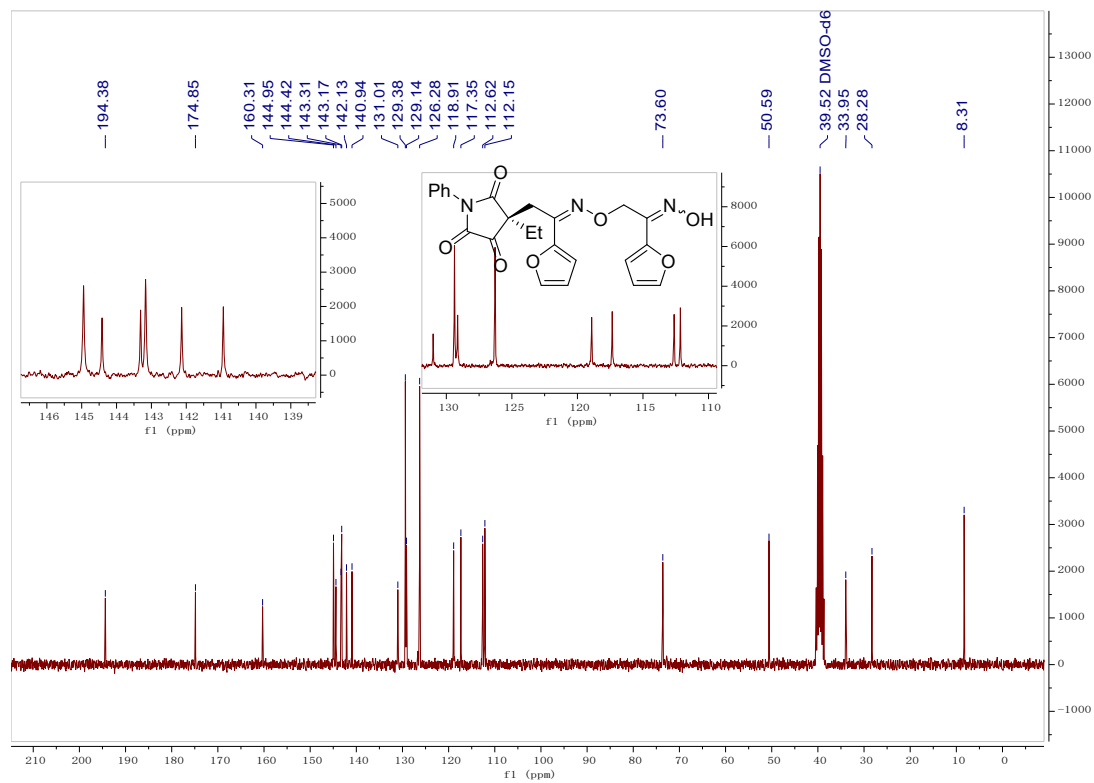



**3an****<sup>1</sup>H NMR (300 MHz, DMSO-*d*<sub>6</sub>)**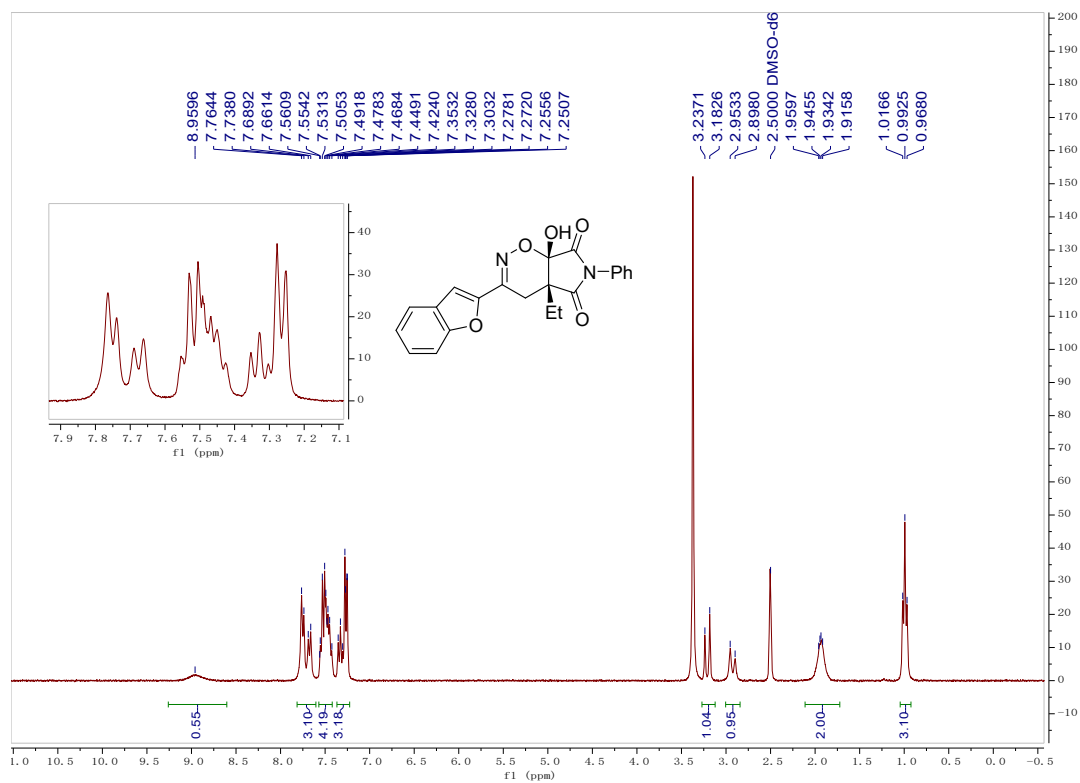**<sup>13</sup>C NMR (75 MHz, DMSO-*d*<sub>6</sub>)**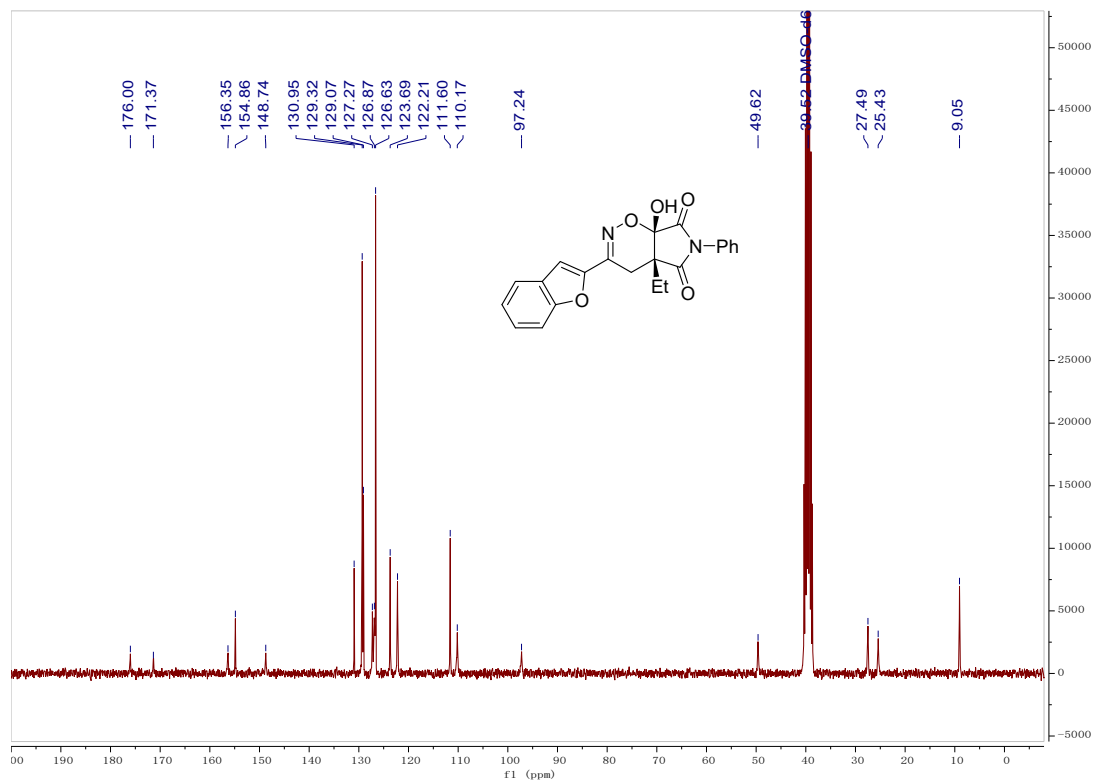

3an'

<sup>1</sup>H NMR (300 MHz, DMSO-d<sub>6</sub>)

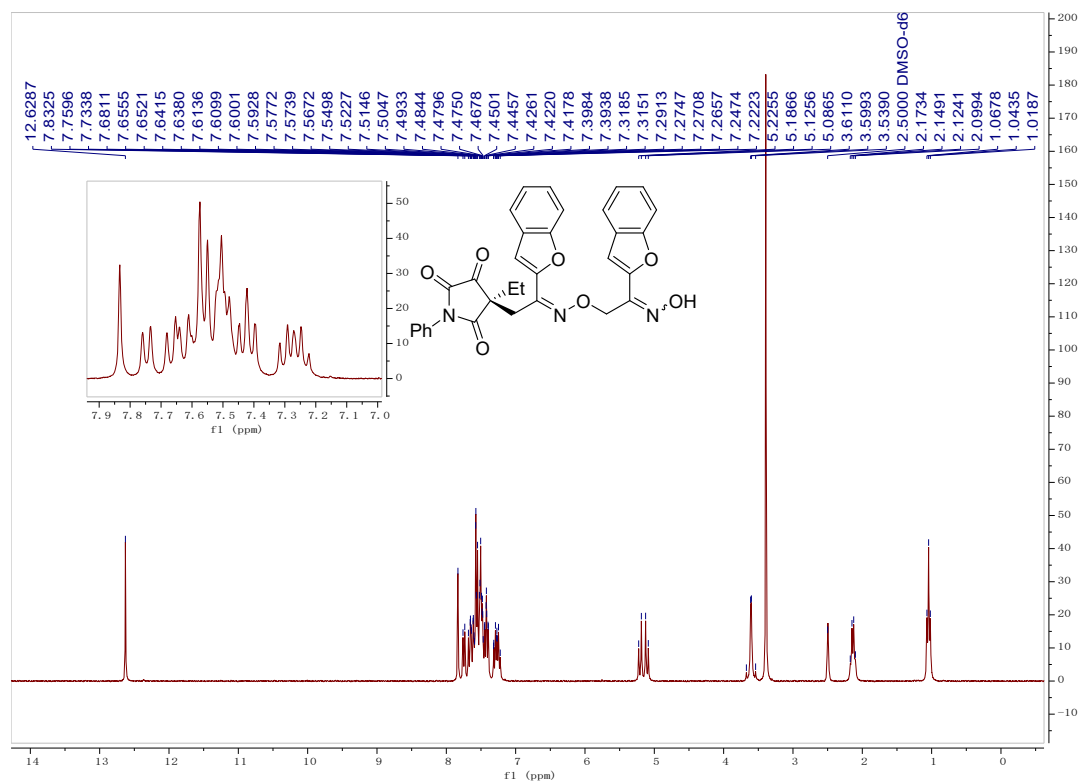

<sup>13</sup>C NMR (75 MHz, DMSO-d<sub>6</sub>)

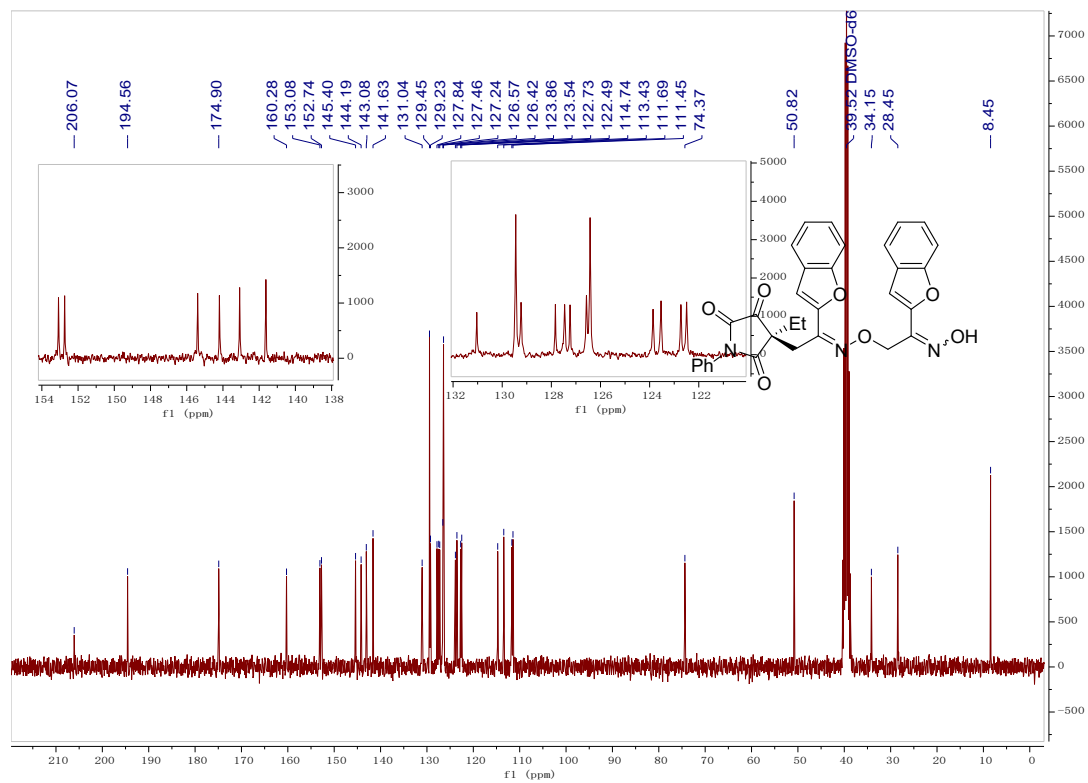

3ao

<sup>1</sup>H NMR (600 MHz, DMSO-d<sub>6</sub>)

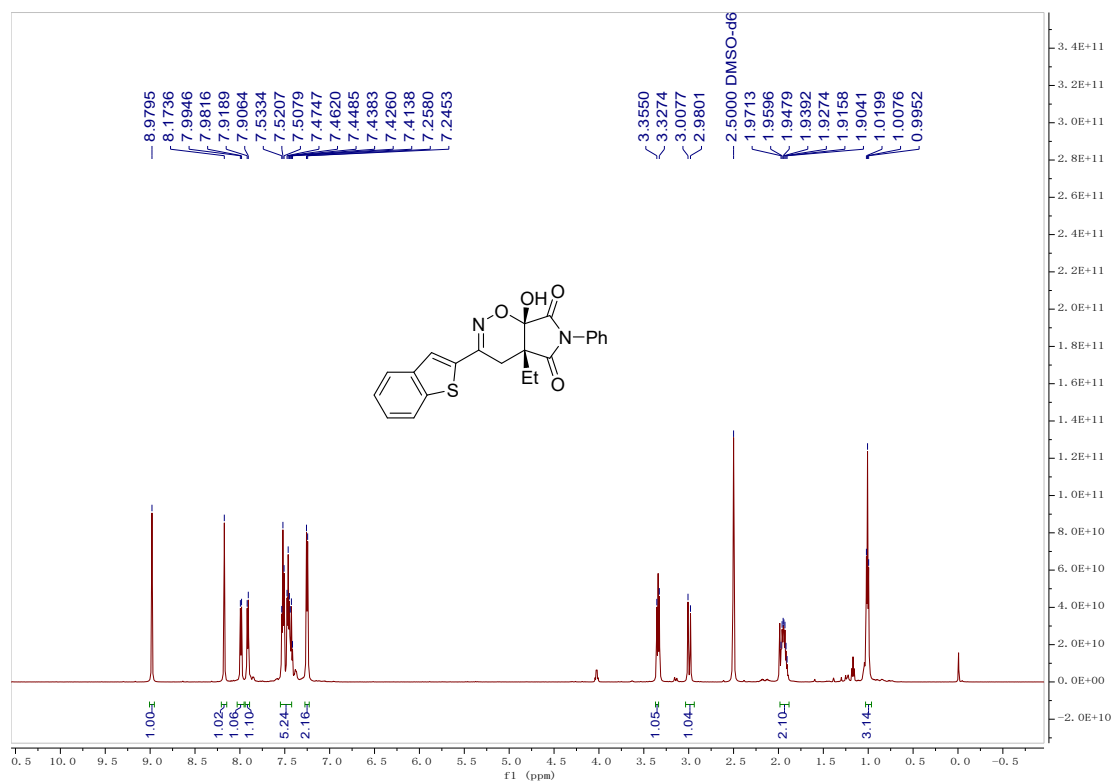

<sup>13</sup>C NMR (150 MHz, DMSO-d<sub>6</sub>)

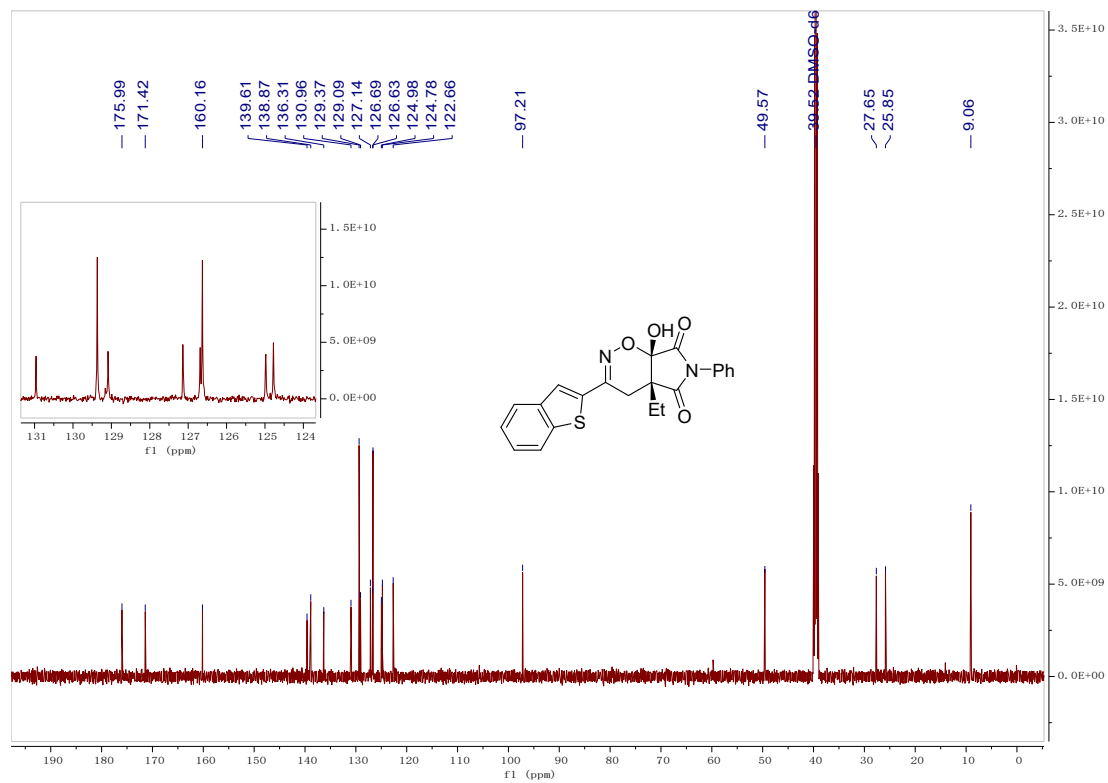

3a0'

<sup>1</sup>H NMR (300 MHz, DMSO-d<sub>6</sub>)

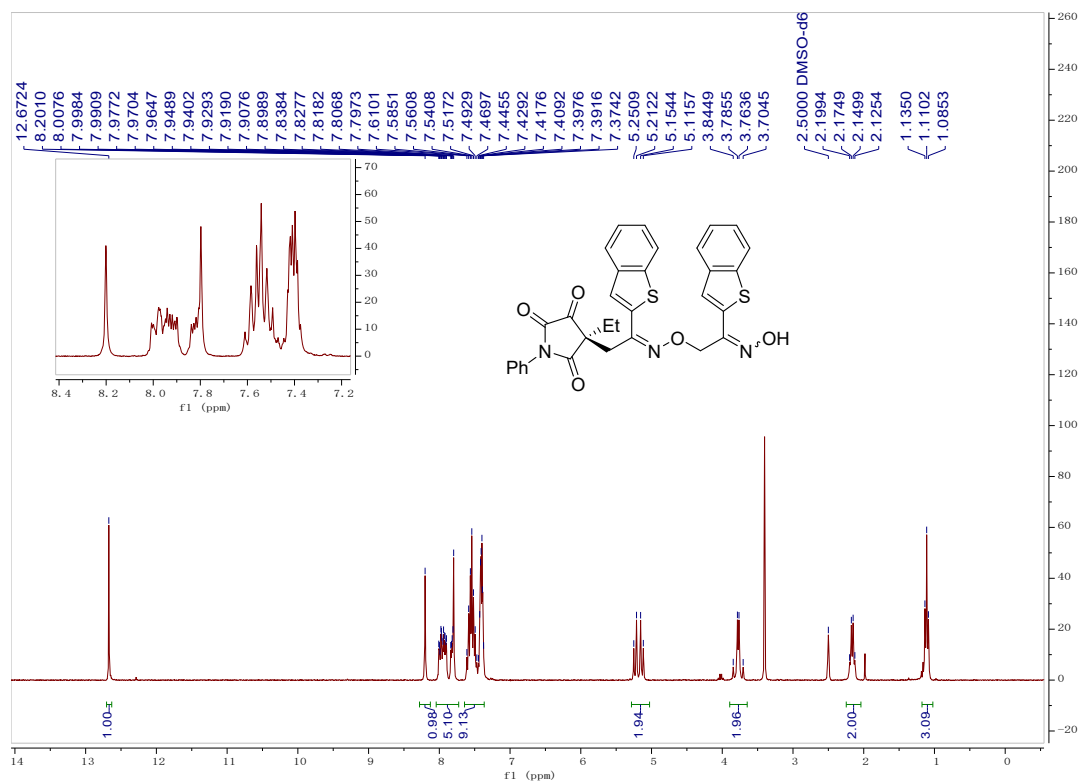

<sup>13</sup>C NMR (75 MHz, DMSO-d<sub>6</sub>)

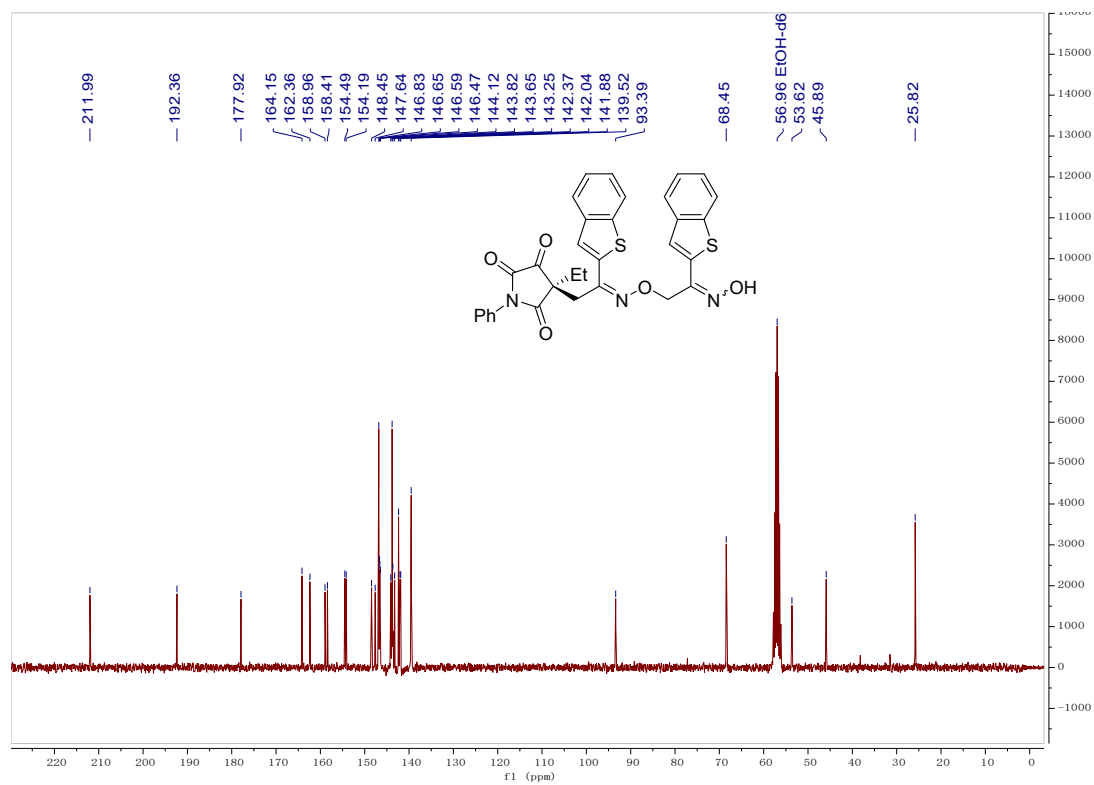

3ap'

<sup>1</sup>H NMR (300 MHz, DMSO-d<sub>6</sub>)

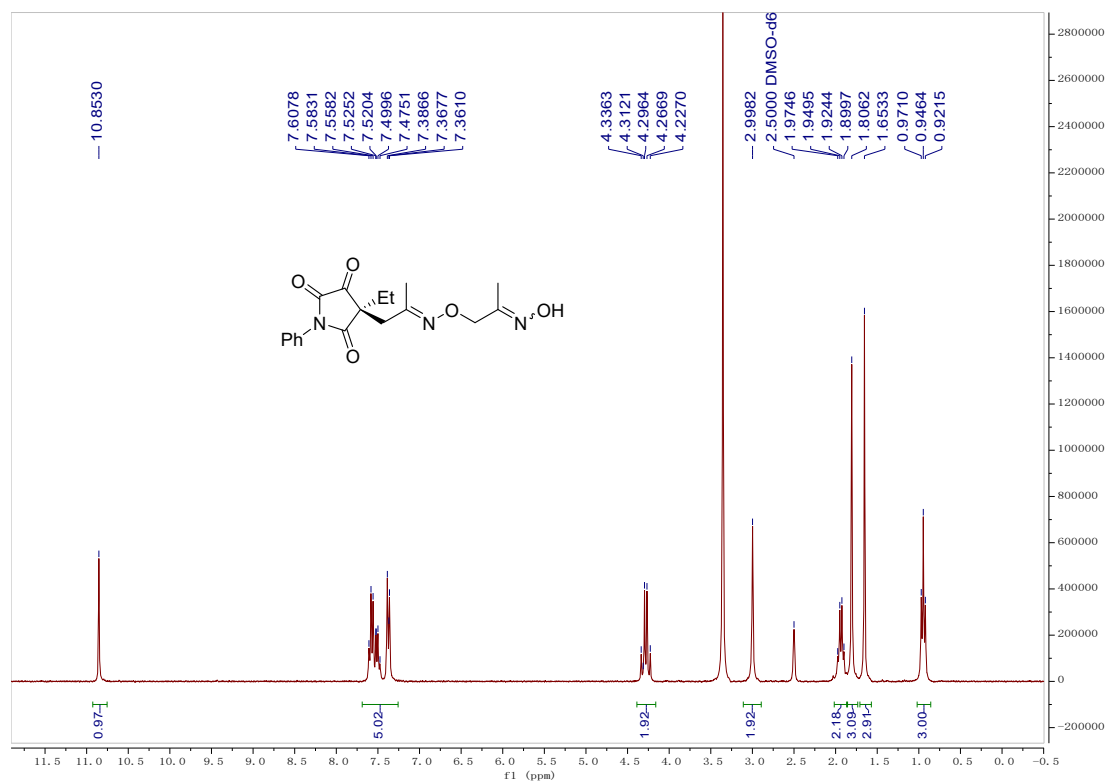

<sup>13</sup>C NMR (75 MHz, DMSO-d<sub>6</sub>)

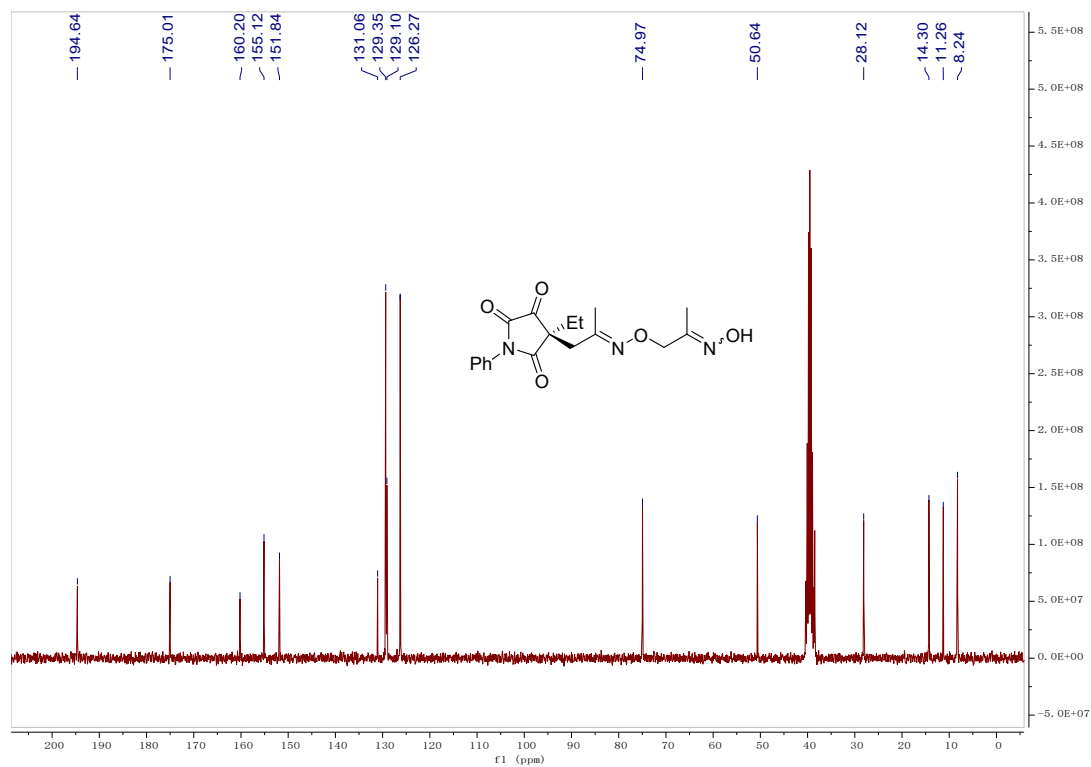

### 3ama

$^1\text{H}$  NMR (300 MHz,  $\text{DMSO-}d_6$ )

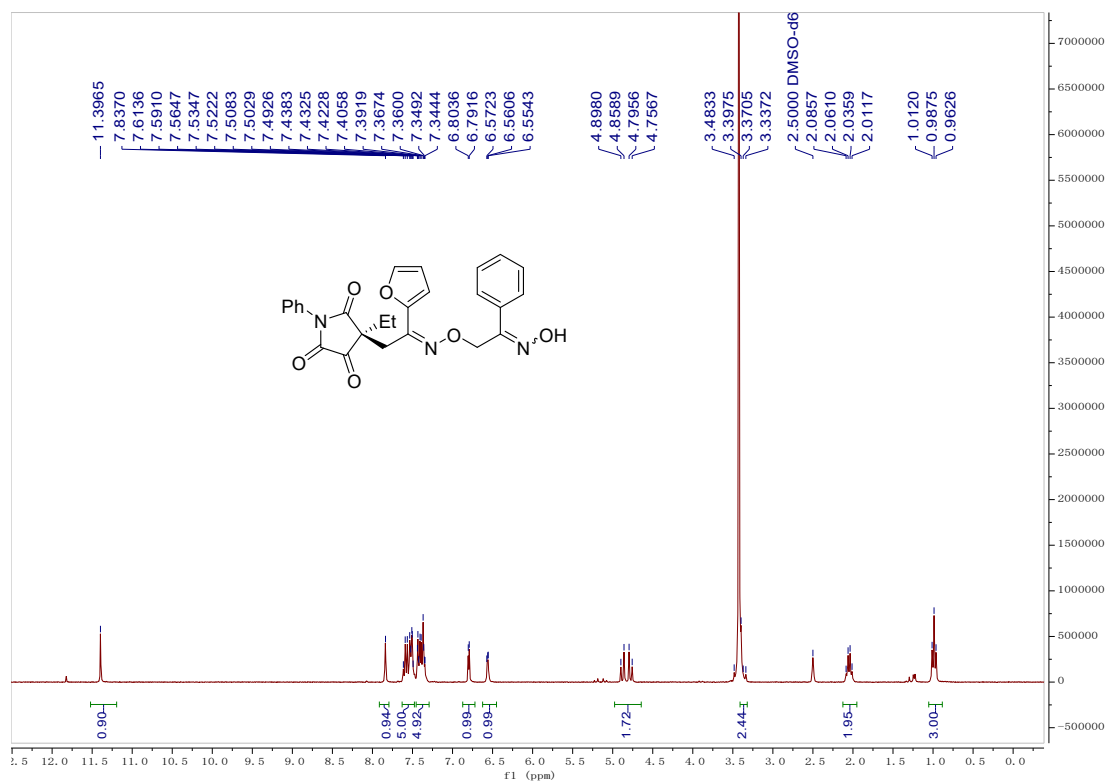

$^{13}\text{C}$  NMR (75 MHz,  $\text{DMSO-}d_6$ )

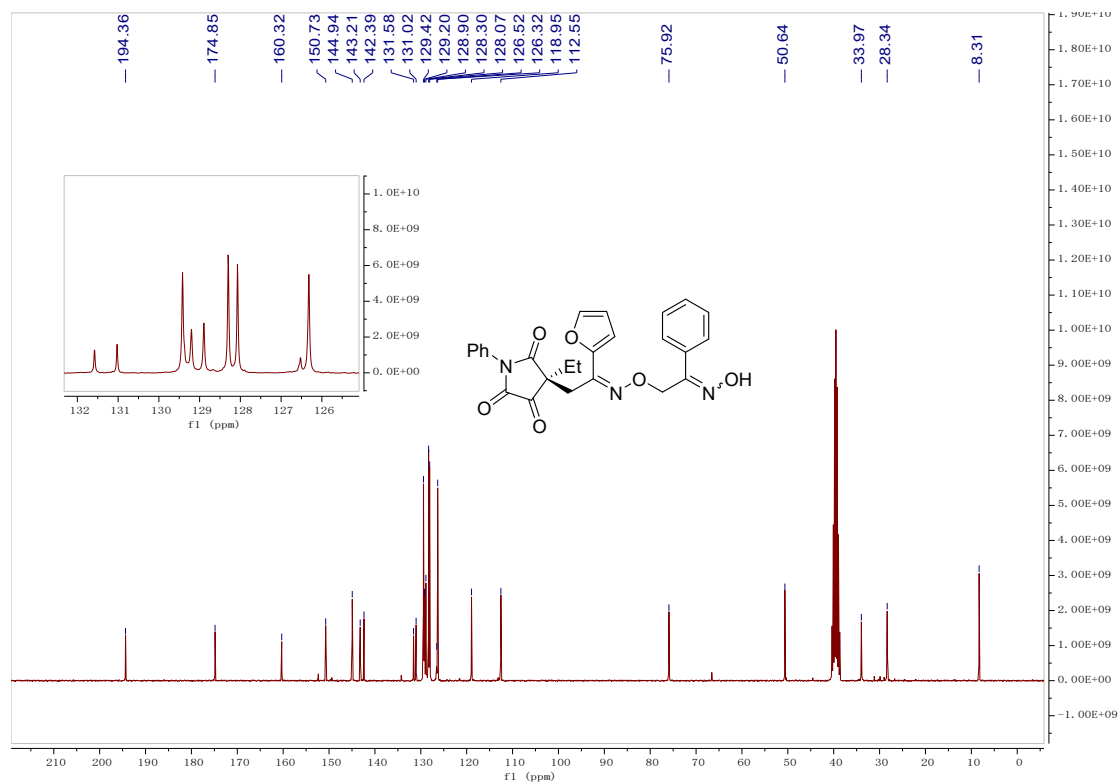

5

<sup>1</sup>H NMR (300 MHz, DMSO-d<sub>6</sub>)

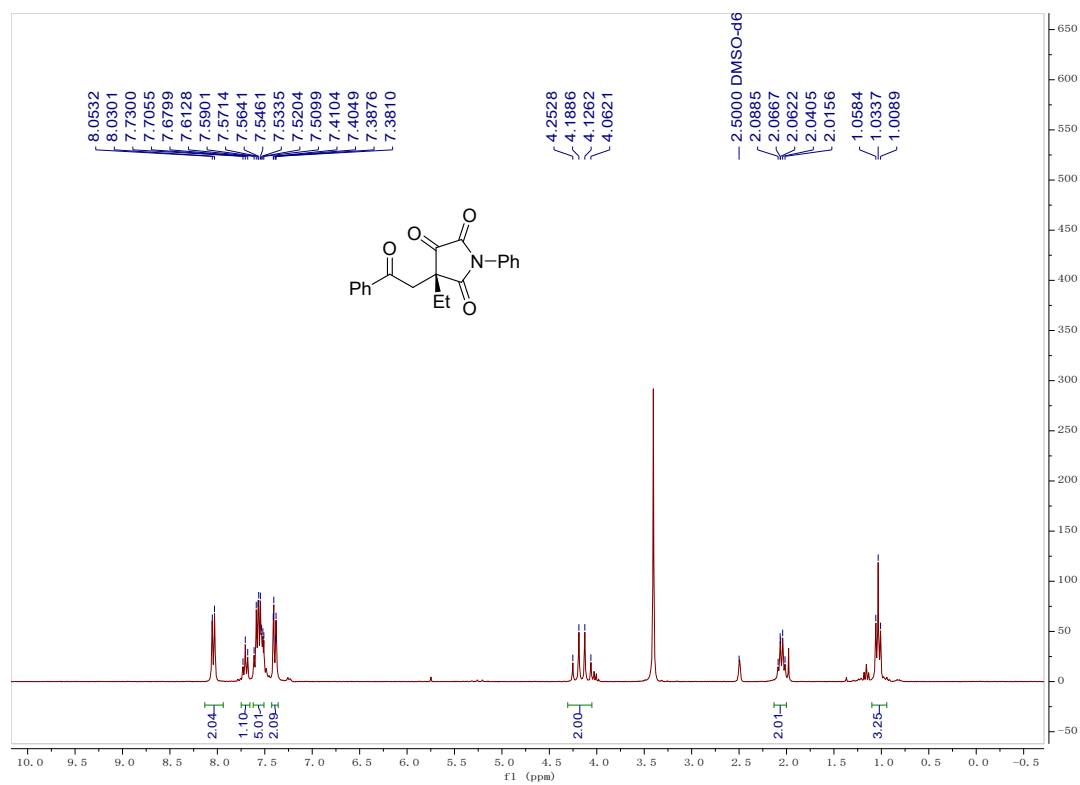

<sup>13</sup>C NMR (75 MHz, DMSO-d<sub>6</sub>)

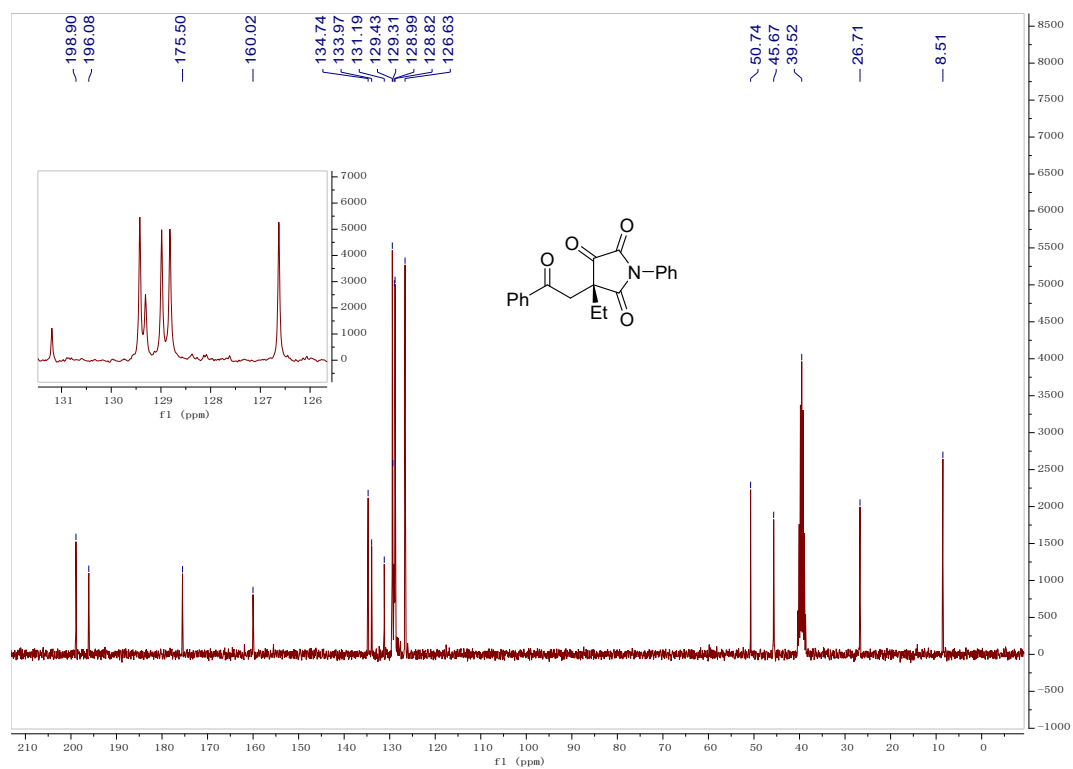

HPLC

3aa

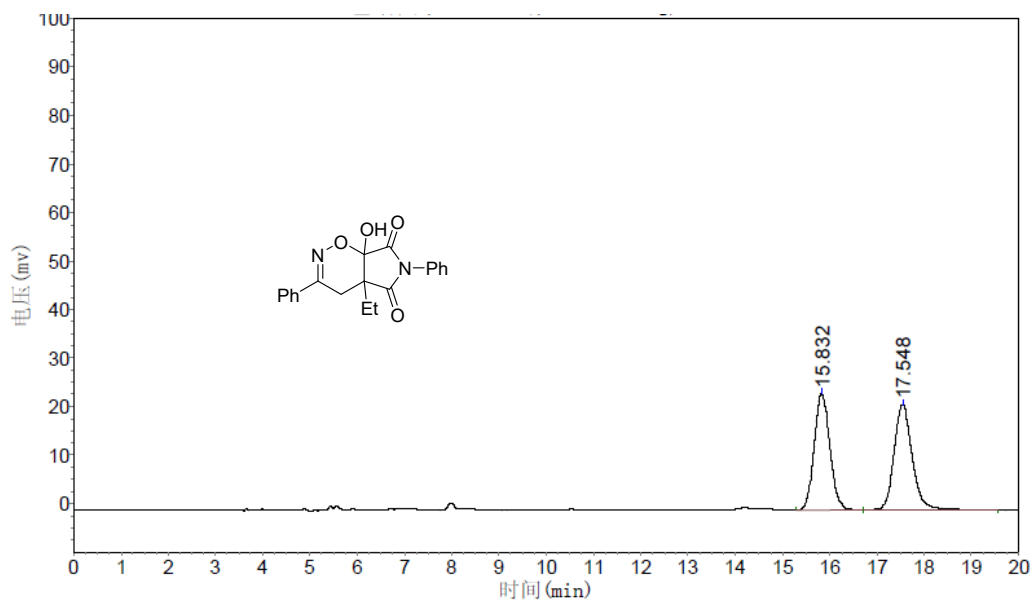

| Peak# | Ret. Time (min) | Height (mV*sec) | Area (mv)  | Area (%) |
|-------|-----------------|-----------------|------------|----------|
| 1     | 15.827          | 24066.148       | 557999.688 | 49.1340  |
| 2     | 17.548          | 21693.217       | 577668.438 | 50.8660  |

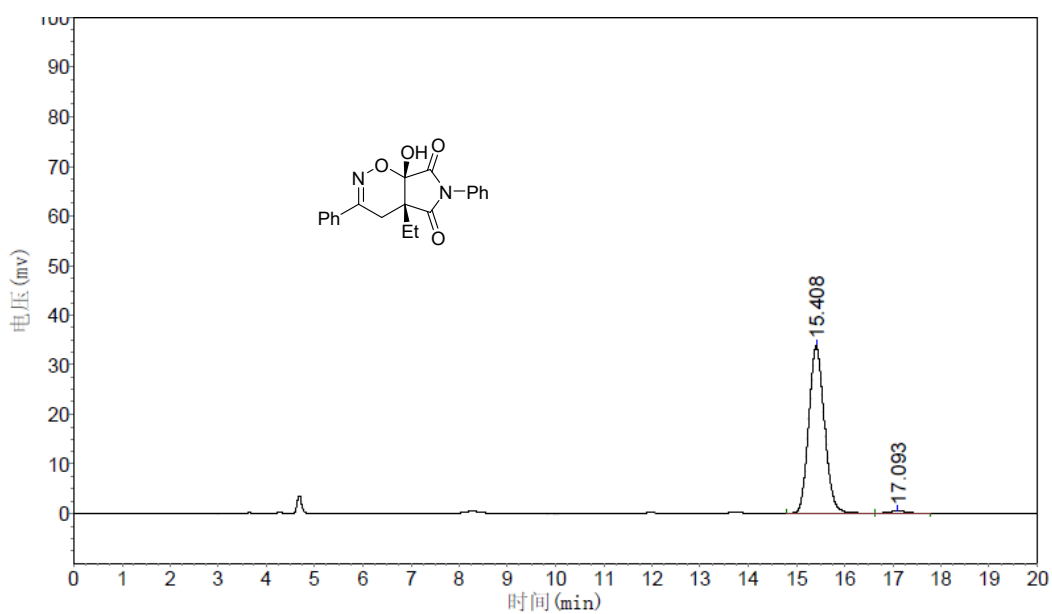

| Peak# | Ret. Time (min) | Height (mV*sec) | Area (mv)  | Area (%) |
|-------|-----------------|-----------------|------------|----------|
| 1     | 15.408          | 33863.457       | 760736.688 | 98.5613  |
| 2     | 17.093          | 454.692         | 11104.500  | 1.4387   |

HPLC conditions: Chiralpak AD-H, n-hexane/isopropanol = 80/20, flow rate 1.0 mL/min,  $\lambda = 254$  nm,  $t_{\text{major}} = 15$  min,  $t_{\text{minor}} = 17$  min



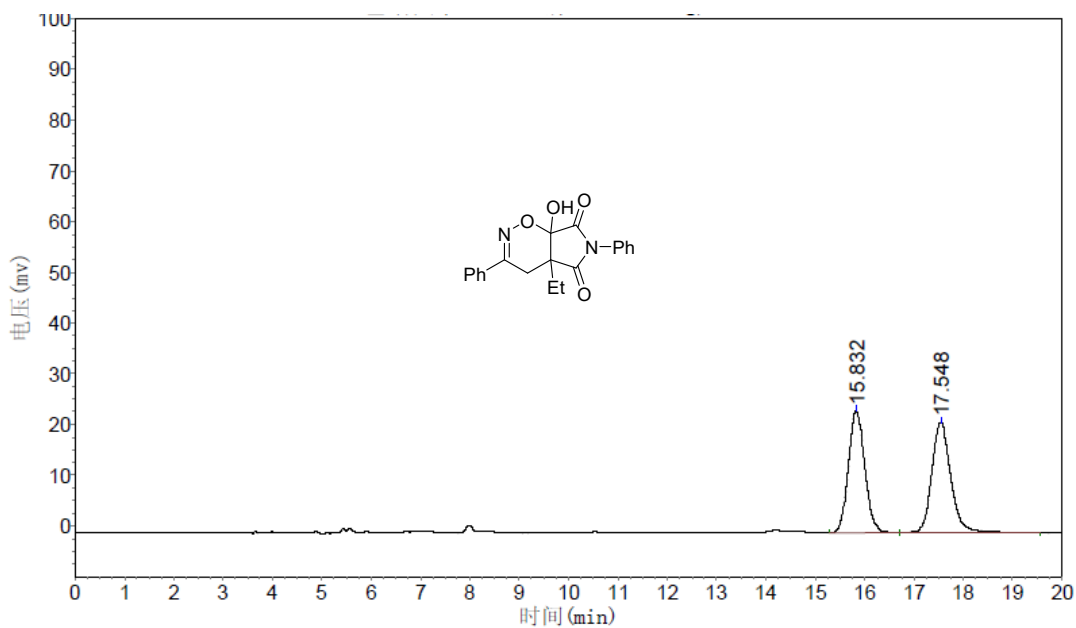

| Peak# | Ret. Time (min) | Height (mV*sec) | Area (mv)  | Area (%) |
|-------|-----------------|-----------------|------------|----------|
| 1     | 15.832          | 24066.148       | 557999.688 | 49.1340  |
| 2     | 17.548          | 21693.217       | 577668.438 | 50.8660  |

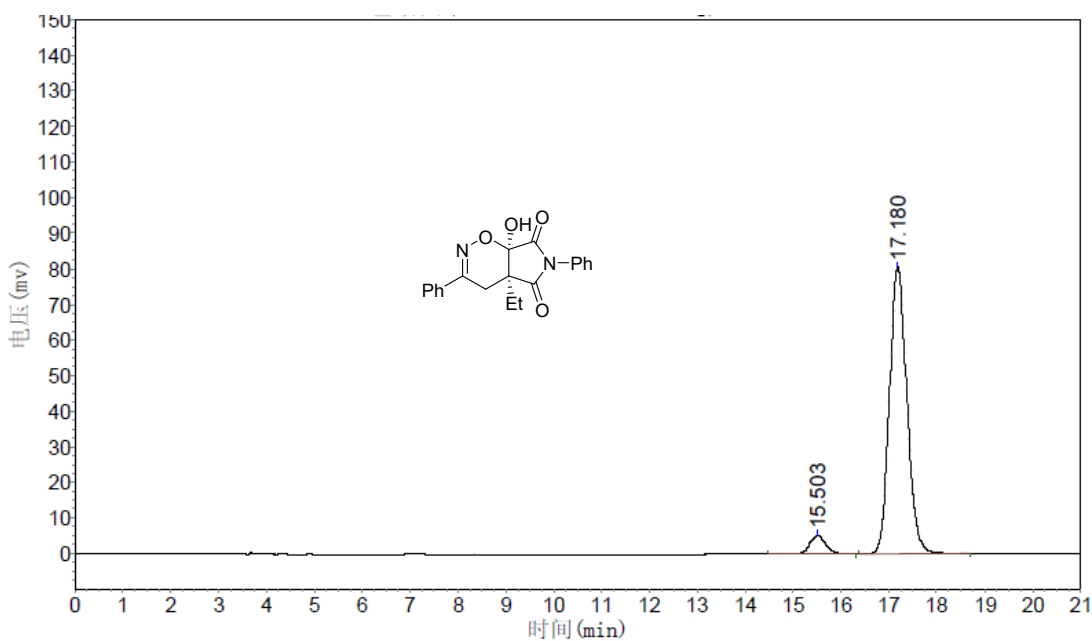

| Peak# | Ret. Time (min) | Height (mV*sec) | Area (mv)   | Area (%) |
|-------|-----------------|-----------------|-------------|----------|
| 1     | 15.503          | 5139.938        | 113870.164  | 5.2945   |
| 2     | 17.180          | 80435.602       | 2036871.250 | 94.7055  |

HPLC conditions: Chiralpak AD-H, n-hexane/isopropanol = 80/20, flow rate 1.0 mL/min,  $\lambda = 254$  nm,  $t_{\text{major}} = 15$  min,  $t_{\text{minor}} = 17$  min

3ba

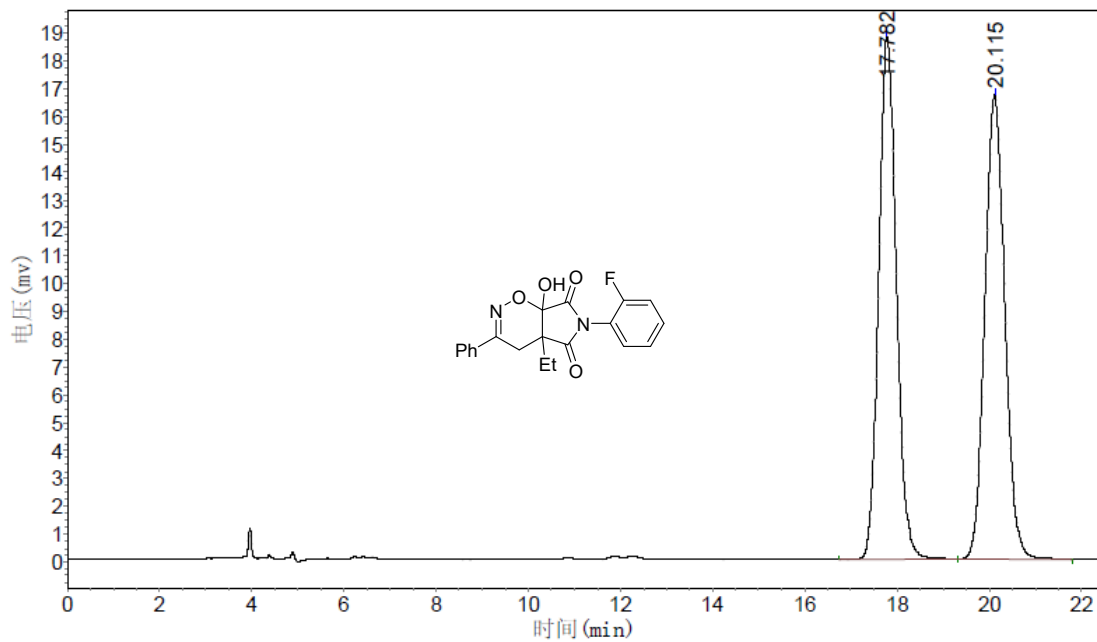

| Peak# | Ret. Time (min) | Height (mV*sec) | Area (mv)  | Area (%) |
|-------|-----------------|-----------------|------------|----------|
| 1     | 17.782          | 18778.156       | 503208.000 | 50.0330  |
| 2     | 20.115          | 16692.918       | 502543.313 | 49.9670  |

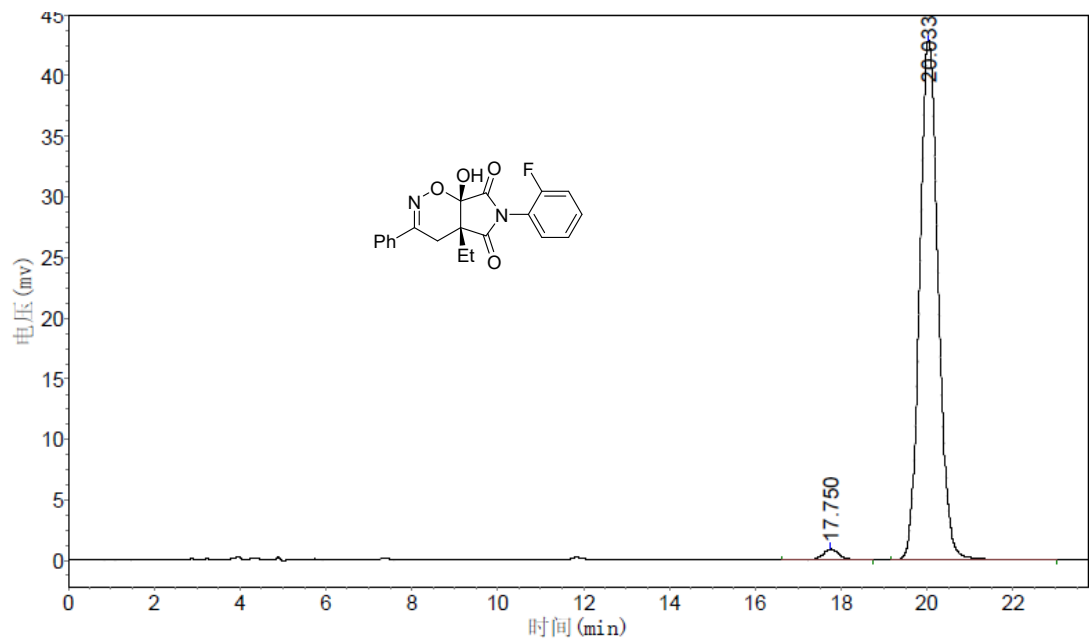

| Peak# | Ret. Time (min) | Height (mV*sec) | Area (mv)   | Area (%) |
|-------|-----------------|-----------------|-------------|----------|
| 1     | 17.750          | 903.929         | 24355.000   | 1.8576   |
| 2     | 20.033          | 42840.961       | 1286759.375 | 98.1424  |

HPLC conditions: Chiralpak AD-H, n-hexane/isopropanol = 80/20, flow rate 1.0 mL/min,  $\lambda = 254$  nm,  $t_{\text{minor}} = 17$  min,  $t_{\text{major}} = 20$  min

3ca

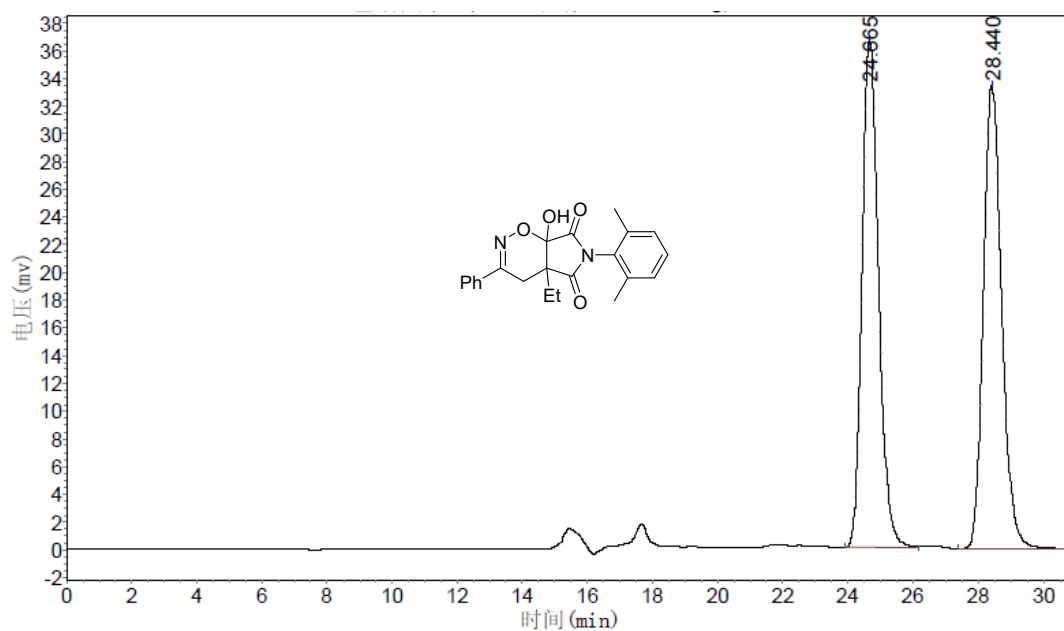

| Peak# | Ret. Time (min) | Height (mV*sec) | Area (mv)   | Area (%) |
|-------|-----------------|-----------------|-------------|----------|
| 1     | 24.665          | 36545.426       | 1298136.000 | 49.7389  |
| 2     | 28.440          | 33384.840       | 1304495.625 | 49.9826  |

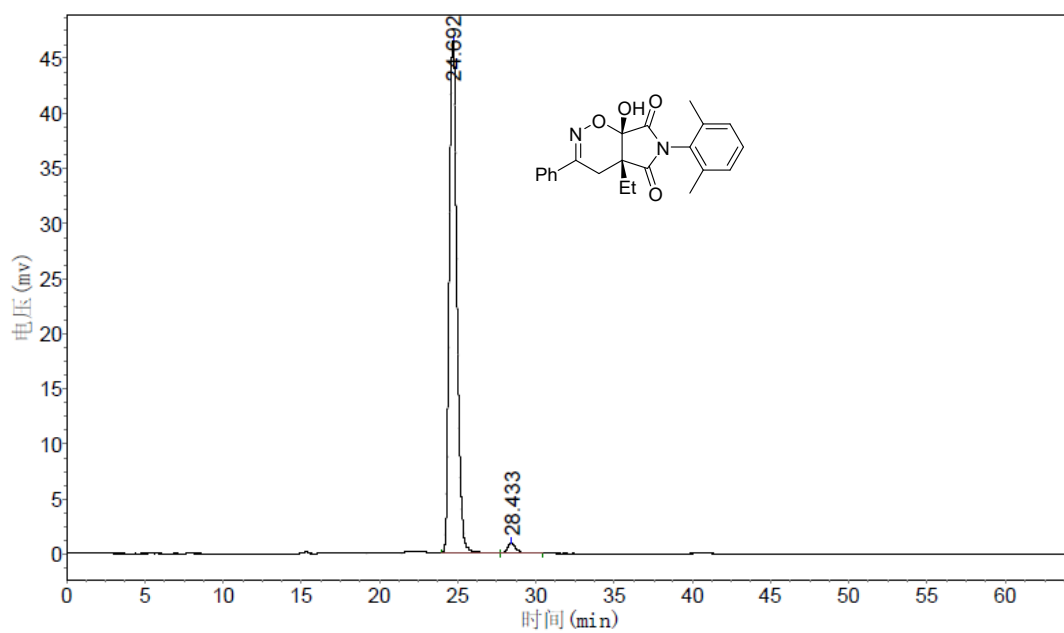

| Peak# | Ret. Time (min) | Height (mV*sec) | Area (mv)   | Area (%) |
|-------|-----------------|-----------------|-------------|----------|
| 1     | 24.692          | 46528.074       | 1543716.500 | 97.7531  |
| 2     | 28.433          | 950.273         | 35482.434   | 2.2469   |

HPLC conditions: Chiralpak AD-H, n-hexane/isopropanol = 80/20, flow rate 1.0 mL/min,  $\lambda = 254$  nm,  $t_{\text{major}} = 24$  min,  $t_{\text{minor}} = 28$  min

3da

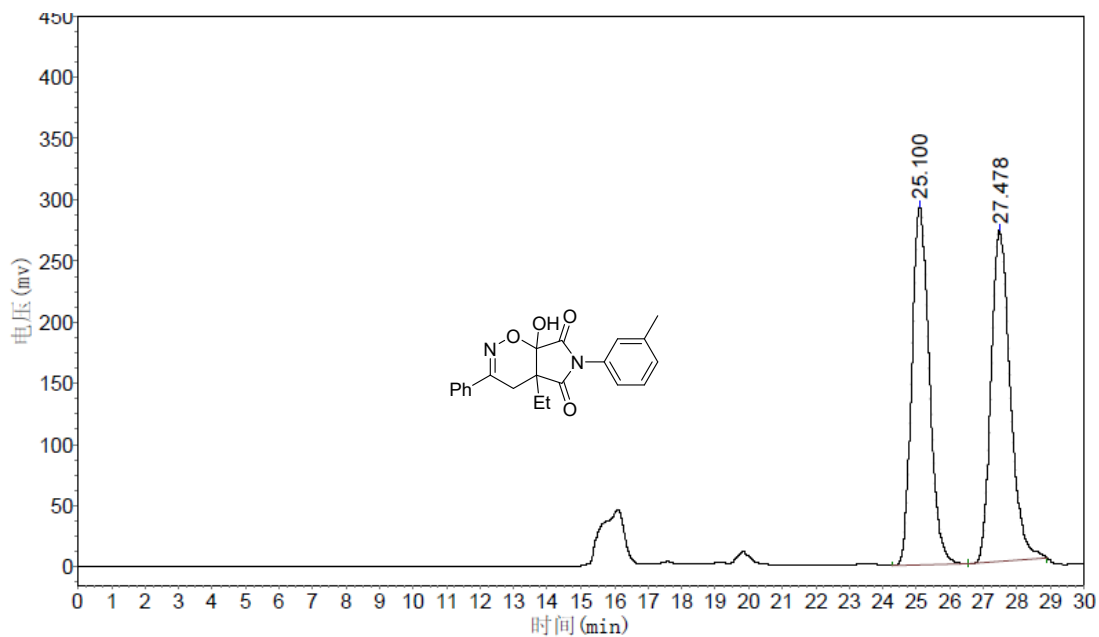

| Peak# | Ret. Time (min) | Height (mV*sec) | Area (mv)    | Area (%) |
|-------|-----------------|-----------------|--------------|----------|
| 1     | 25.100          | 293124.344      | 10581355.000 | 49.6069  |
| 2     | 27.478          | 270466.375      | 10749064.000 | 50.3931  |

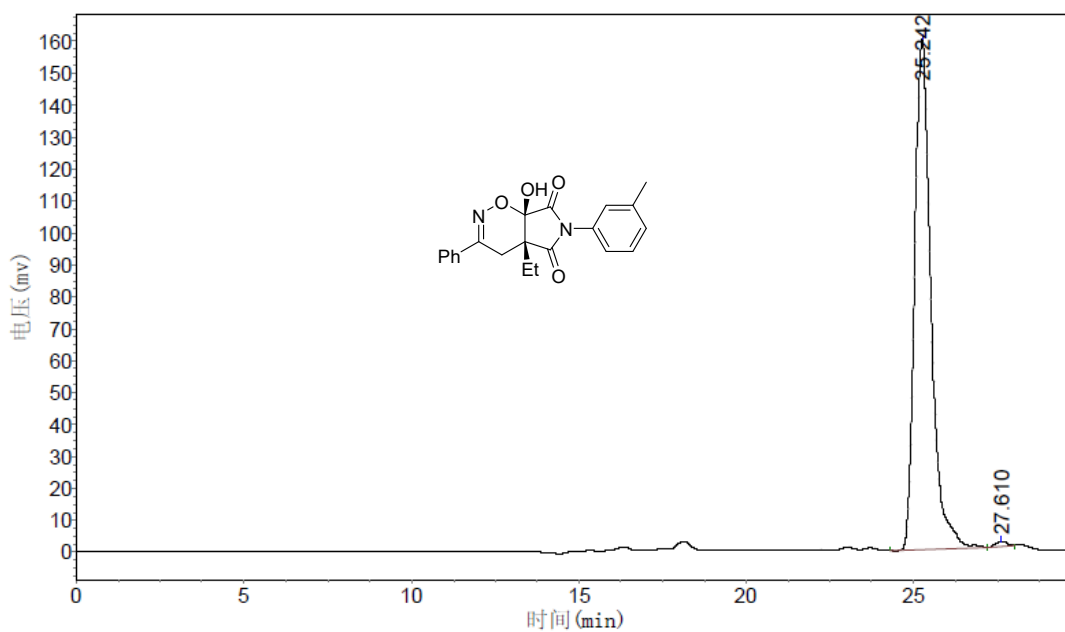

| Peak# | Ret. Time (min) | Height (mV*sec) | Area (mv)   | Area (%) |
|-------|-----------------|-----------------|-------------|----------|
| 1     | 25.242          | 159787.891      | 5398044.500 | 99.3486  |
| 2     | 27.610          | 1512.630        | 35393.914   | 0.6514   |

HPLC conditions: Chiralpak AD-H, n-hexane/isopropanol = 80/20, flow rate 1.0 mL/min,  $\lambda = 254$  nm,  $t_{\text{major}} = 25$  min,  $t_{\text{minor}} = 27$  min

3ea

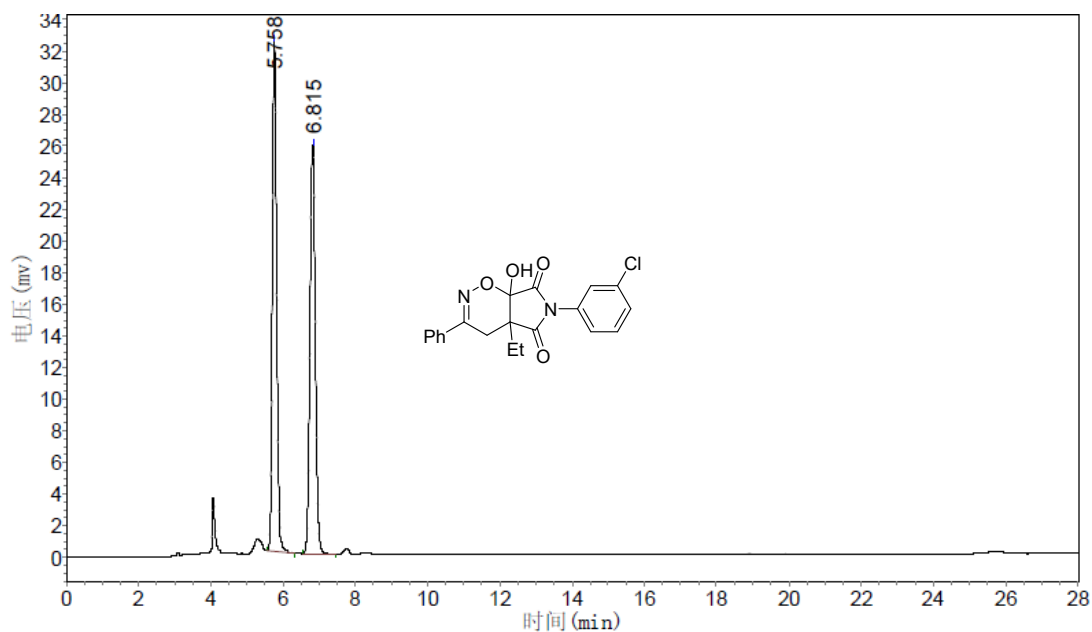

| Peak# | Ret. Time (min) | Height (mV*sec) | Area (mv)  | Area (%) |
|-------|-----------------|-----------------|------------|----------|
| 1     | 5.758           | 32299.521       | 267806.688 | 51.2212  |
| 2     | 6.815           | 25835.373       | 255037.000 | 48.7788  |

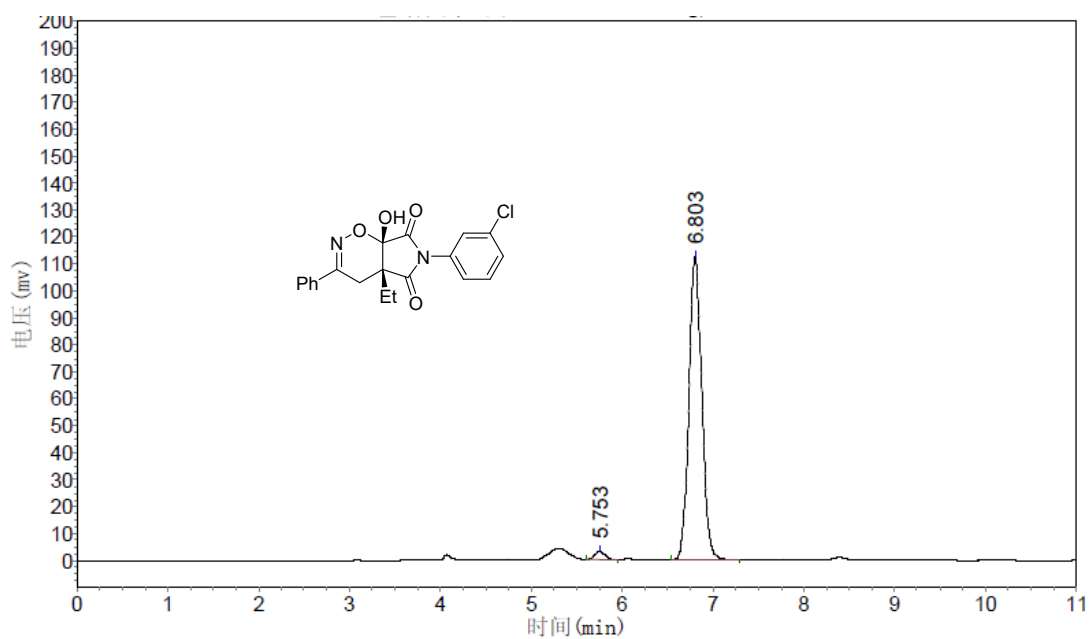

| Peak# | Ret. Time (min) | Height (mV*sec) | Area (mv)   | Area (%) |
|-------|-----------------|-----------------|-------------|----------|
| 1     | 5.753           | 2956.296        | 22936.852   | 2.0261   |
| 2     | 6.803           | 112480.641      | 1109129.750 | 97.9739  |

Chiralpak IC, n-hexane/isopropanol = 80/20, flow rate 1.0 mL/min,  $\lambda = 254$  nm,  $t_{\text{minor}} = 5$  min,  $t_{\text{major}} = 6$  min

**3fa**

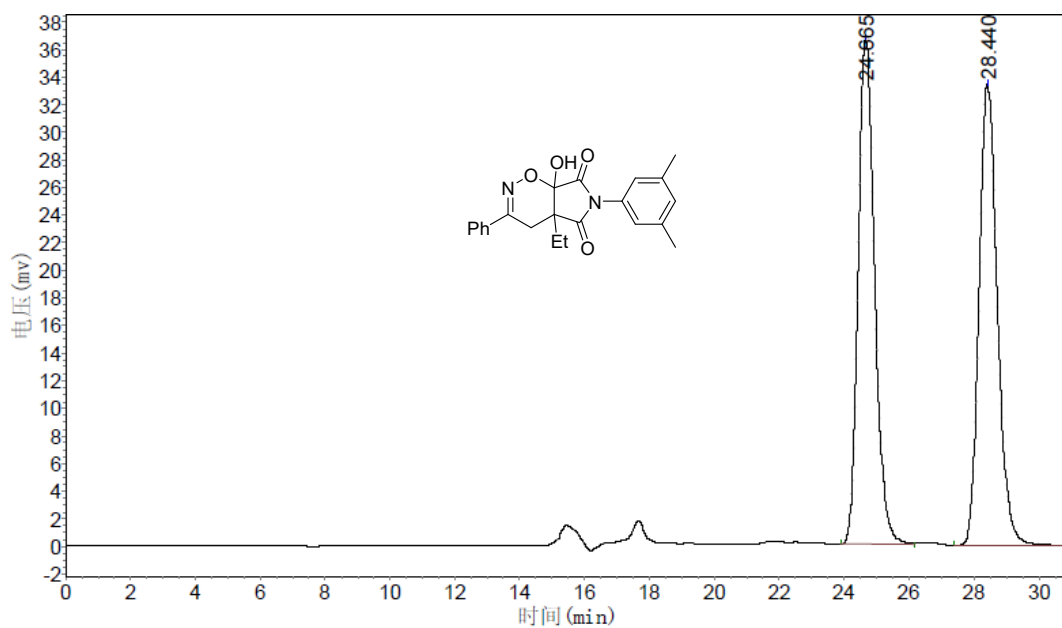

| Peak# | Ret. Time (min) | Height (mV*sec) | Area (mv)   | Area (%) |
|-------|-----------------|-----------------|-------------|----------|
| 1     | 24.665          | 36545.426       | 1298136.000 | 49.7389  |
| 2     | 28.440          | 33384.840       | 1304495.625 | 49.9826  |

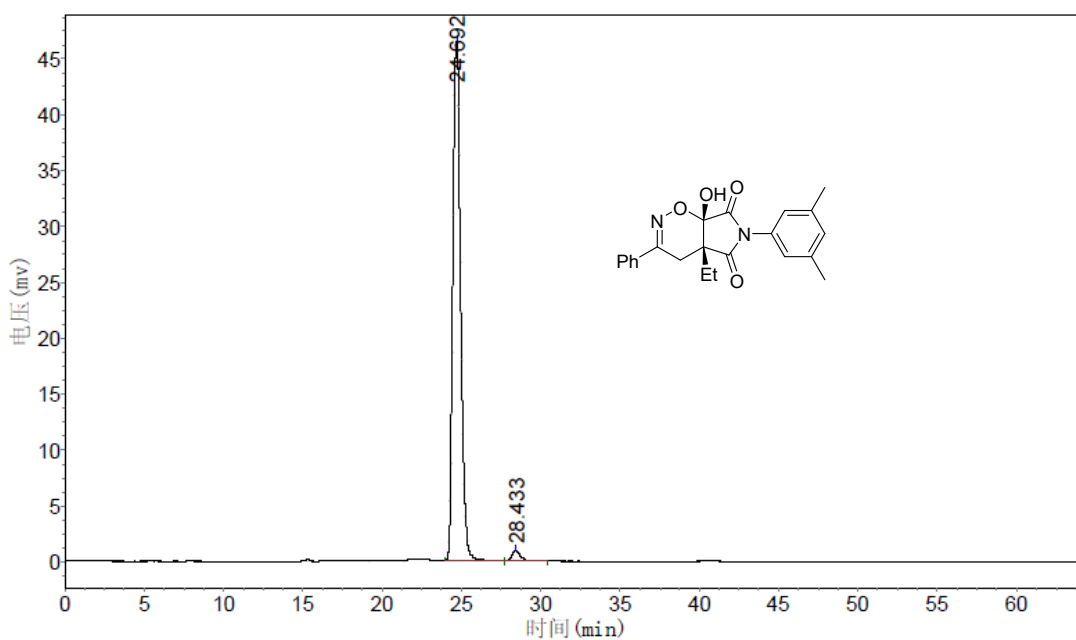

| Peak# | Ret. Time (min) | Height (mV*sec) | Area (mv)   | Area (%) |
|-------|-----------------|-----------------|-------------|----------|
| 1     | 24.692          | 46528.074       | 1543716.500 | 97.7531  |
| 2     | 28.433          | 950.273         | 35482.434   | 2.2469   |

Chiralpak AD-H, n-hexane/isopropanol = 80/20, flow rate 1.0 mL/min,  $\lambda = 254$  nm,  $t_{\text{major}} = 24$  min,  $t_{\text{minor}} = 28$  min

3ga

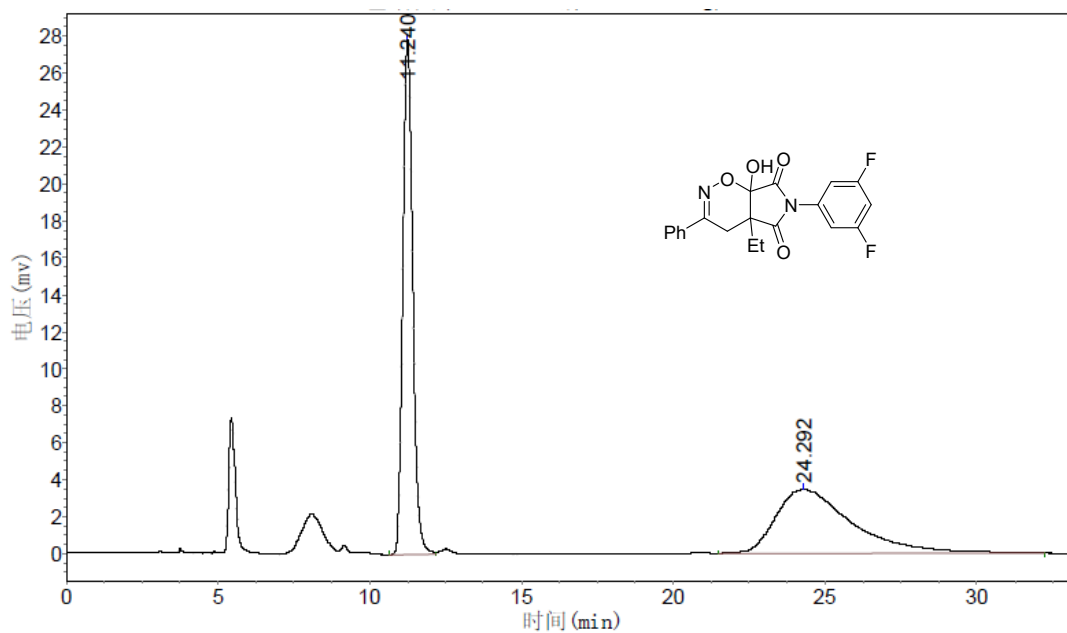

| Peak# | Ret. Time (min) | Height (mV*sec) | Area (mv)  | Area (%) |
|-------|-----------------|-----------------|------------|----------|
| 1     | 11.240          | 27906.396       | 630051.750 | 50.8120  |
| 2     | 24.292          | 3464.418        | 609915.750 | 49.1880  |

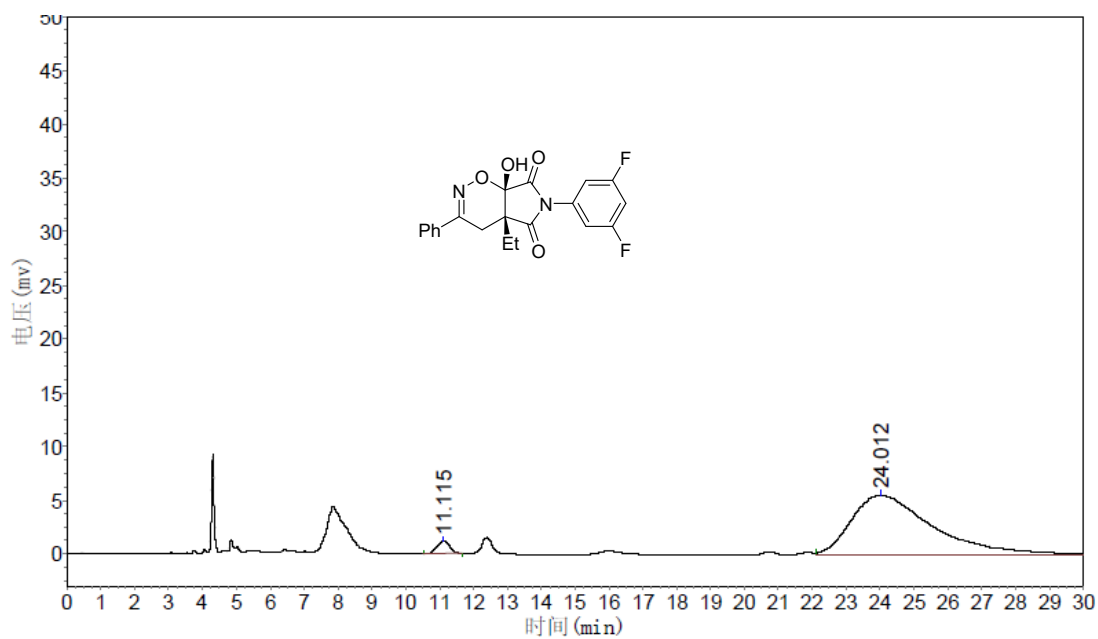

| Peak# | Ret. Time (min) | Height (mV*sec) | Area (mv)  | Area (%) |
|-------|-----------------|-----------------|------------|----------|
| 1     | 11.115          | 1124.944        | 29053.533  | 3.0614   |
| 2     | 24.012          | 5494.825        | 919965.500 | 96.9386  |

Chiralpak AD-H, n-hexane/isopropanol = 80/20, flow rate 1.0 mL/min,  $\lambda = 254$  nm,  $t_{\text{minor}} = 11$  min,  $t_{\text{major}} = 24$  min

3ha

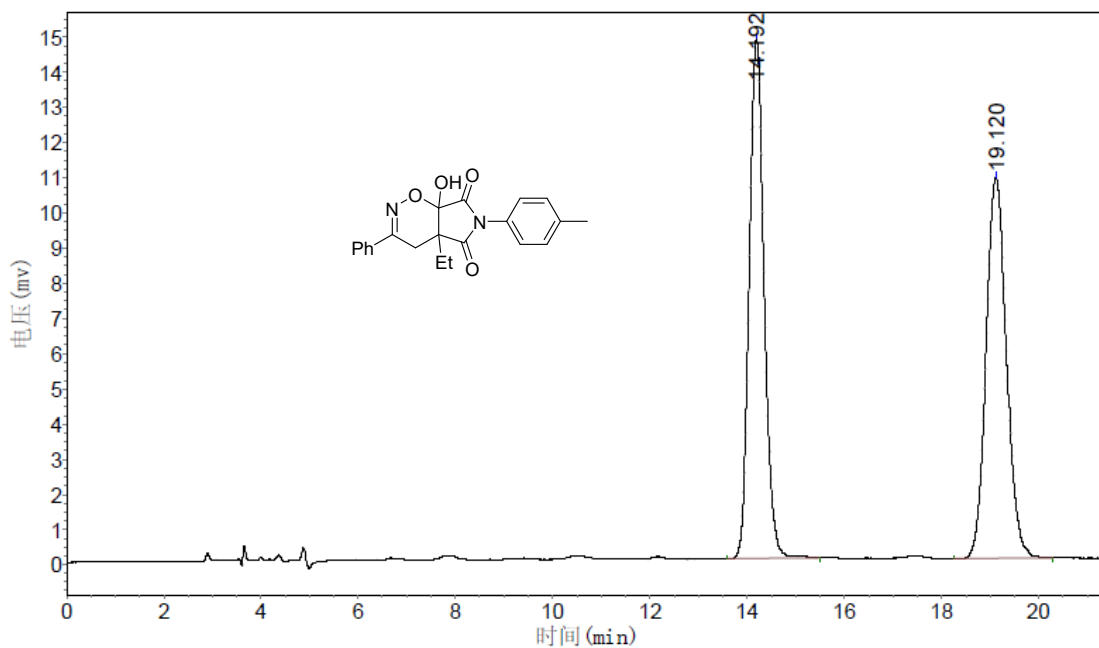

| Peak# | Ret. Time (min) | Height (mV*sec) | Area (mv)  | Area (%) |
|-------|-----------------|-----------------|------------|----------|
| 1     | 14.192          | 1124.944        | 29053.533  | 50.0500  |
| 2     | 19.120          | 10817.121       | 314046.219 | 49.9500  |

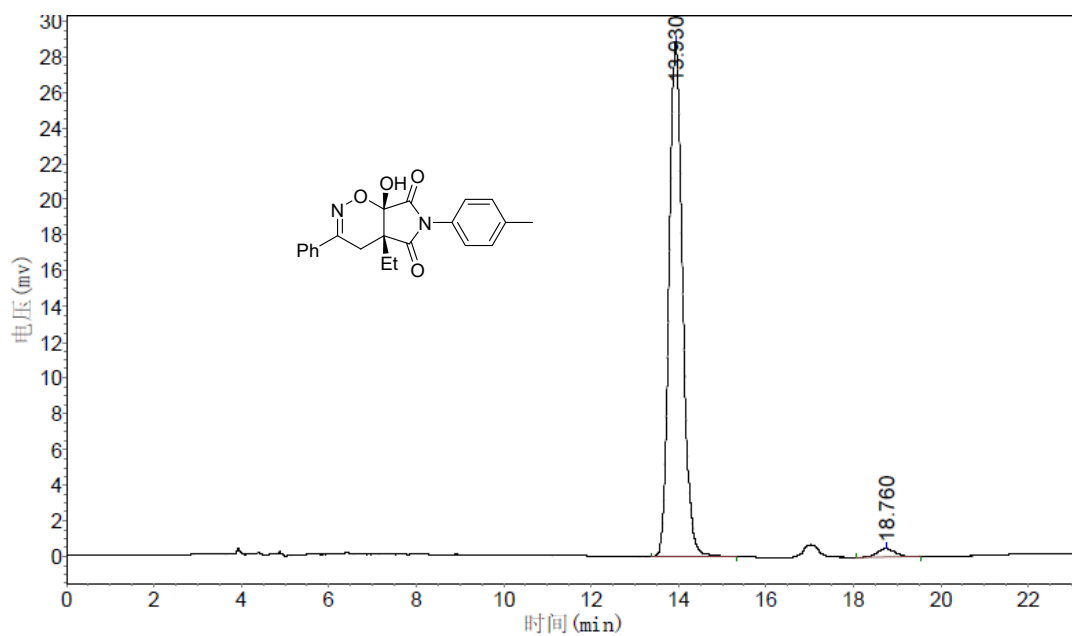

| Peak# | Ret. Time (min) | Height (mV*sec) | Area (mv)  | Area (%) |
|-------|-----------------|-----------------|------------|----------|
| 1     | 13.930          | 28870.078       | 616349.875 | 97.8330  |
| 2     | 18.760          | 487.956         | 13651.851  | 2.1670   |

Chiralpak AD-H, n-hexane/isopropanol = 80/20, flow rate 1.0 mL/min,  $\lambda = 254$  nm,  $t_{\text{major}} = 14$  min,  $t_{\text{minor}} = 18$  min



## 3ia

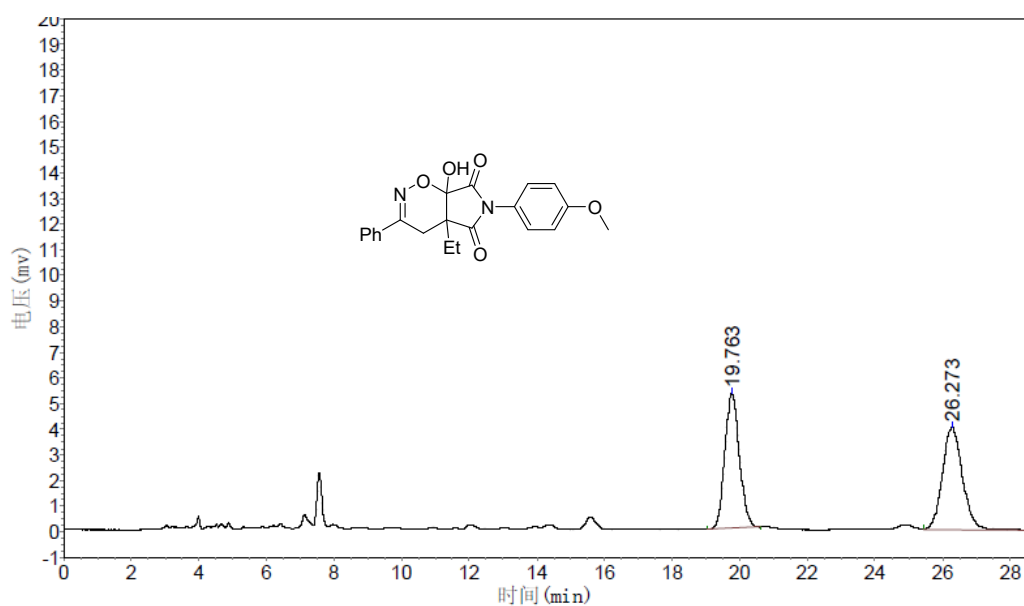

| Peak# | Ret. Time (min) | Height (mV*sec) | Area (mv)  | Area (%) |
|-------|-----------------|-----------------|------------|----------|
| 1     | 19.763          | 5247.229        | 157341.094 | 49.3942  |
| 2     | 26.273          | 3957.042        | 161200.422 | 50.6058  |

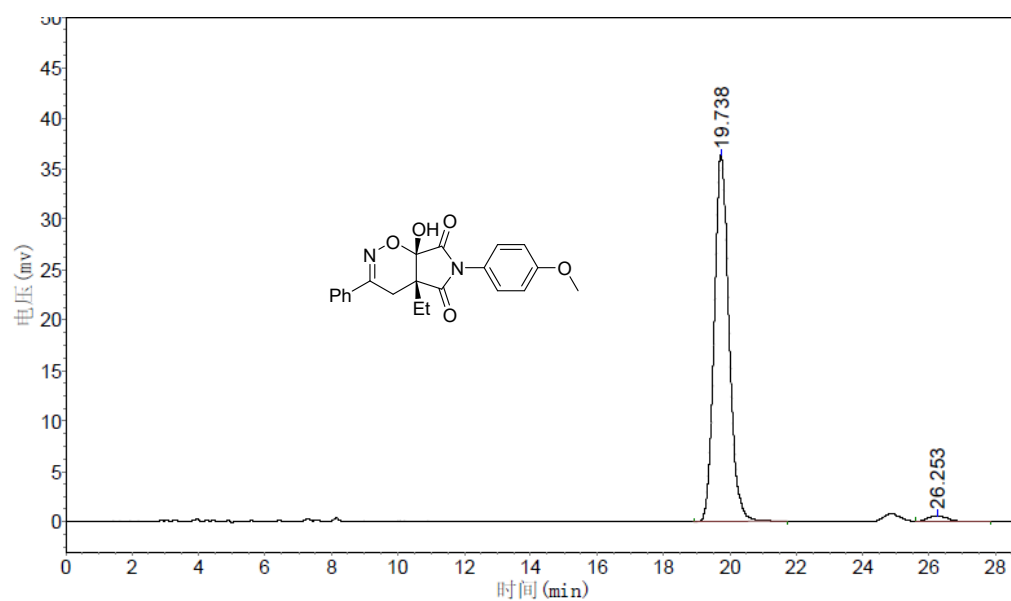

| Peak# | Ret. Time (min) | Height (mV*sec) | Area (mv)   | Area (%) |
|-------|-----------------|-----------------|-------------|----------|
| 1     | 19.738          | 36346.707       | 1120485.875 | 97.8678  |
| 2     | 26.253          | 590.034         | 24411.162   | 2.1322   |

Chiralpak AD-H, n-hexane/isopropanol = 80/20, flow rate 1.0 mL/min,  $\lambda = 254$  nm,  $t_{\text{major}} = 19$  min,  $t_{\text{minor}} = 26$  min

3ja

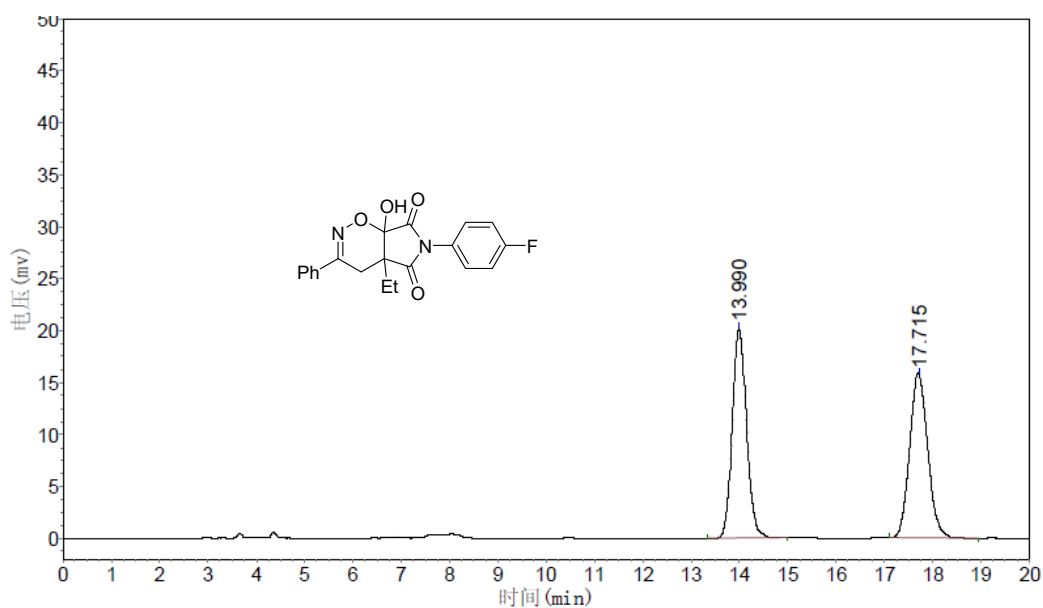

| Peak# | Ret. Time (min) | Height (mV*sec) | Area (mv)  | Area (%) |
|-------|-----------------|-----------------|------------|----------|
| 1     | 13.990          | 20232.000       | 413568.313 | 49.9276  |
| 2     | 17.715          | 15846.039       | 414768.000 | 50.0724  |

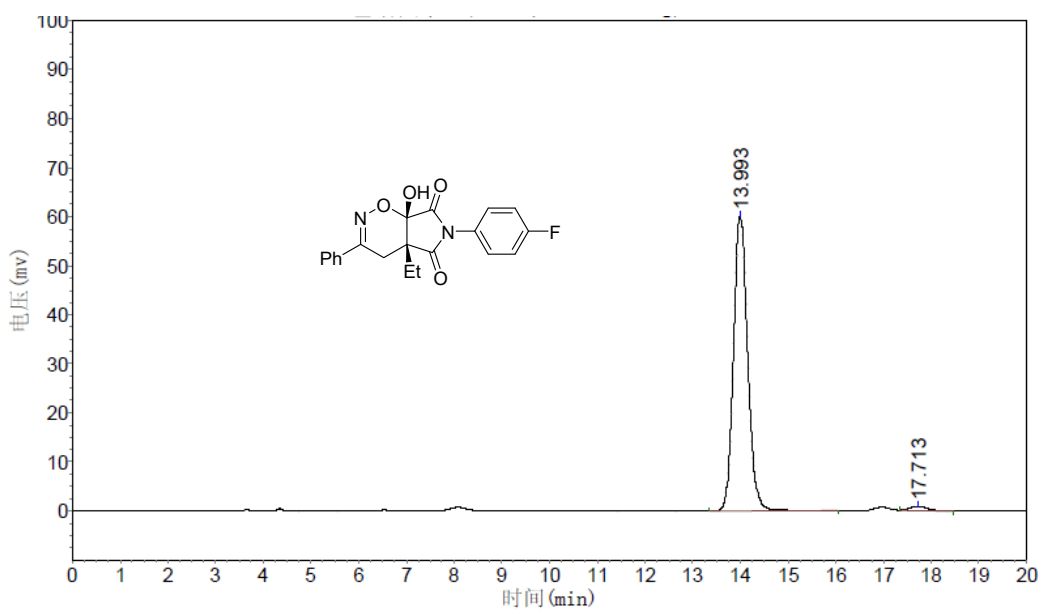

| Peak# | Ret. Time (min) | Height (mV*sec) | Area (mv)   | Area (%) |
|-------|-----------------|-----------------|-------------|----------|
| 1     | 13.993          | 60052.121       | 1236301.250 | 98.1654  |
| 2     | 17.713          | 889.894         | 23105.029   | 1.8346   |

Chiralpak AD-H, n-hexane/isopropanol = 80/20, flow rate 1.0 mL/min,  $\lambda = 254$  nm,  $t_{\text{major}} = 14$  min,  $t_{\text{minor}} = 17$  min

3ka

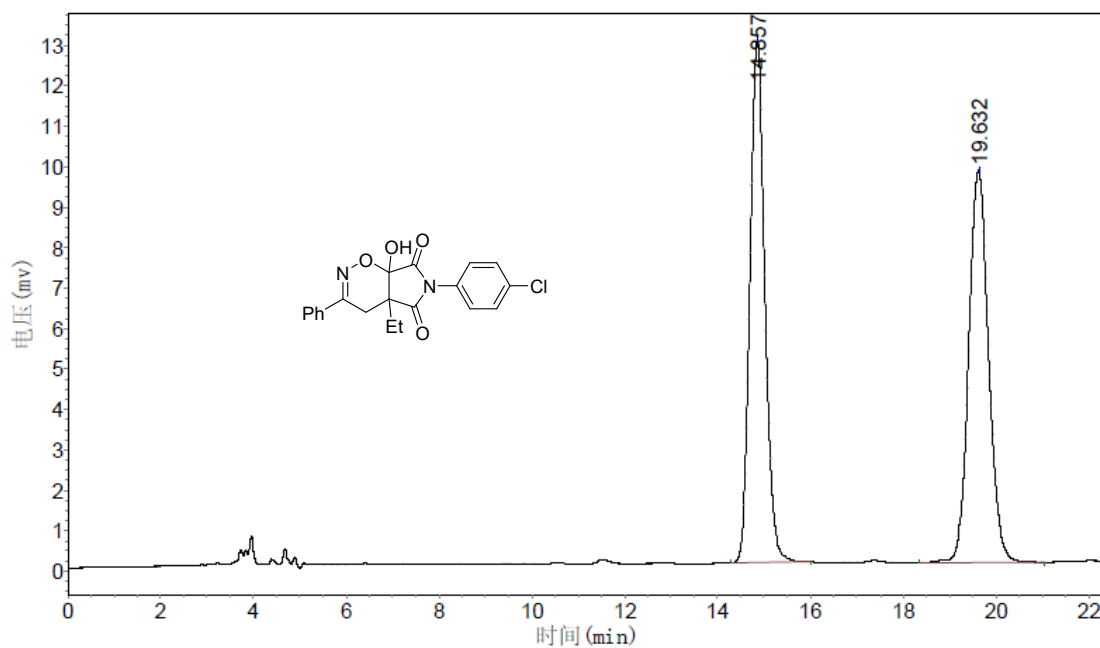

| Peak# | Ret. Time (min) | Height (mV*sec) | Area (mv)  | Area (%) |
|-------|-----------------|-----------------|------------|----------|
| 1     | 14.857          | 12925.391       | 288402.250 | 50.0325  |
| 2     | 19.632          | 9671.908        | 288027.813 | 49.9675  |

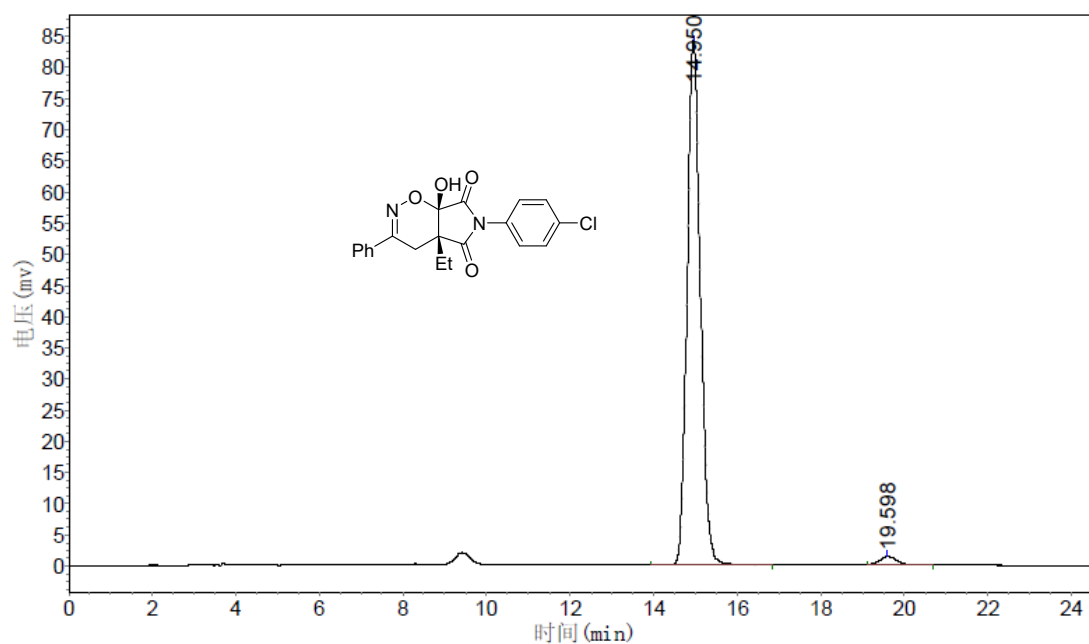

| Peak# | Ret. Time (min) | Height (mV*sec) | Area (mv)   | Area (%) |
|-------|-----------------|-----------------|-------------|----------|
| 1     | 14.950          | 84045.117       | 1869203.250 | 97.7897  |
| 2     | 19.598          | 1454.430        | 42248.543   | 2.2103   |

Chiralpak AD-H, n-hexane/isopropanol = 80/20, flow rate 1.0 mL/min,  $\lambda = 254$  nm,  $t_{\text{major}} = 15$  min,  $t_{\text{minor}} = 19$  min

3la

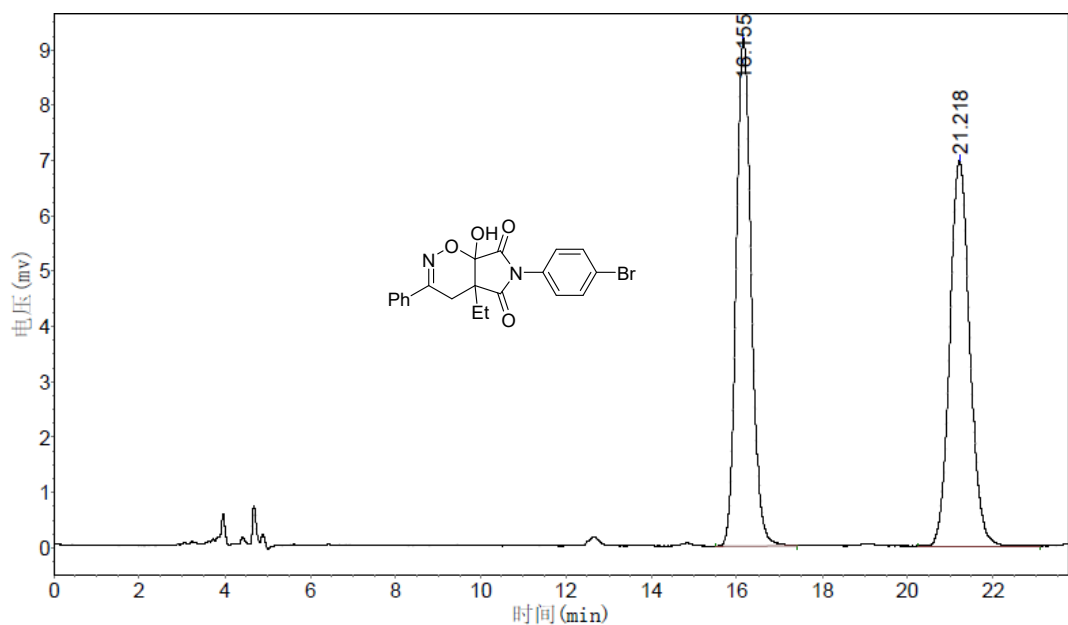

| Peak# | Ret. Time (min) | Height (mV*sec) | Area (mv)  | Area (%) |
|-------|-----------------|-----------------|------------|----------|
| 1     | 16.155          | 9169.237        | 225605.906 | 49.8334  |
| 2     | 21.218          | 6961.228        | 227114.594 | 50.1666  |

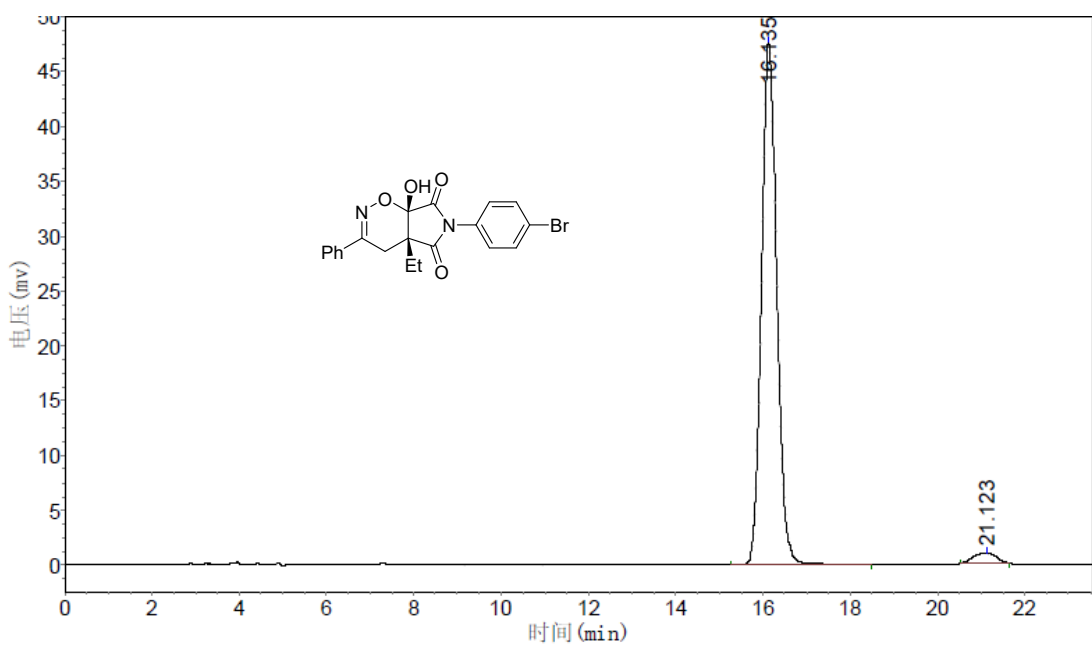

| Peak# | Ret. Time (min) | Height (mV*sec) | Area (mv)   | Area (%) |
|-------|-----------------|-----------------|-------------|----------|
| 1     | 16.135          | 47616.211       | 1157612.000 | 97.0603  |
| 2     | 21.123          | 930.371         | 35060.375   | 2.9396   |

Chiralpak AD-H, n-hexane/isopropanol = 80/20, flow rate 1.0 mL/min,  $\lambda = 254$  nm,  $t_{\text{major}} = 16$  min,  $t_{\text{minor}} = 21$  min

3ma

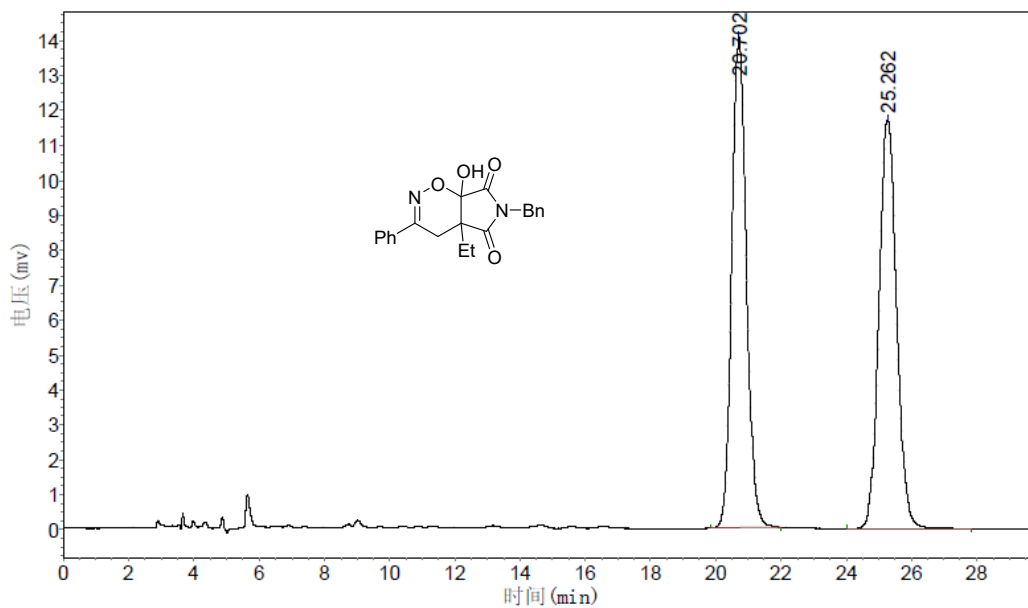

| Peak# | Ret. Time (min) | Height (mV*sec) | Area (mv)  | Area (%) |
|-------|-----------------|-----------------|------------|----------|
| 1     | 20.702          | 14060.308       | 435329.594 | 49.8453  |
| 2     | 25.262          | 11684.464       | 438031.688 | 50.1547  |

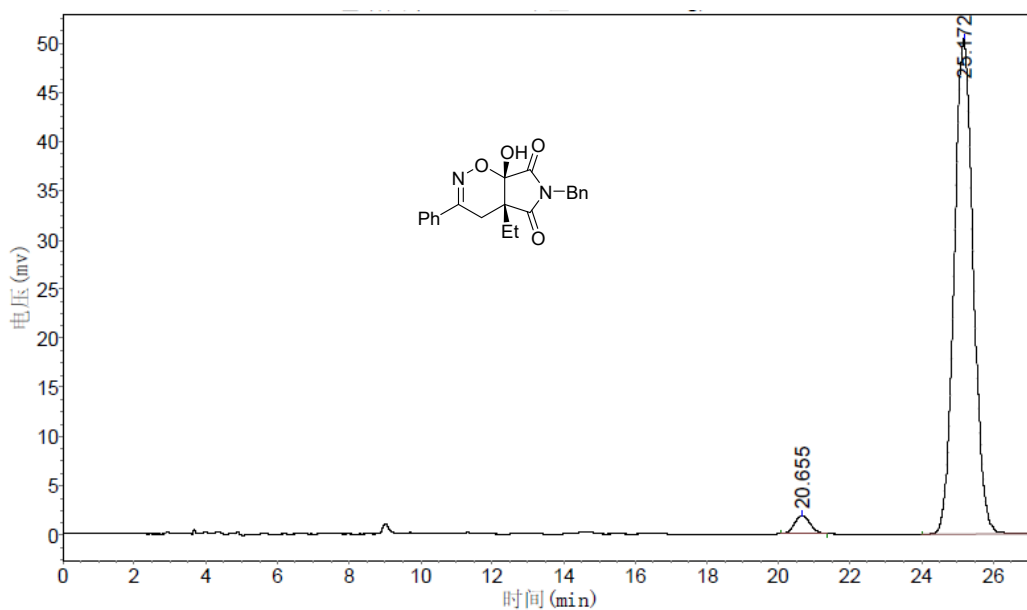

| Peak# | Ret. Time (min) | Height (mV*sec) | Area (mv)   | Area (%) |
|-------|-----------------|-----------------|-------------|----------|
| 1     | 20.655          | 1677.673        | 44997.938   | 2.3719   |
| 2     | 25.172          | 50170.496       | 1852096.000 | 97.6281  |

Chiralpak AD-H, n-hexane/isopropanol = 80/20, flow rate 1.0 mL/min,  $\lambda = 254$  nm,  $t_{\text{minor}} = 20$  min,  $t_{\text{major}} = 25$  min

3na

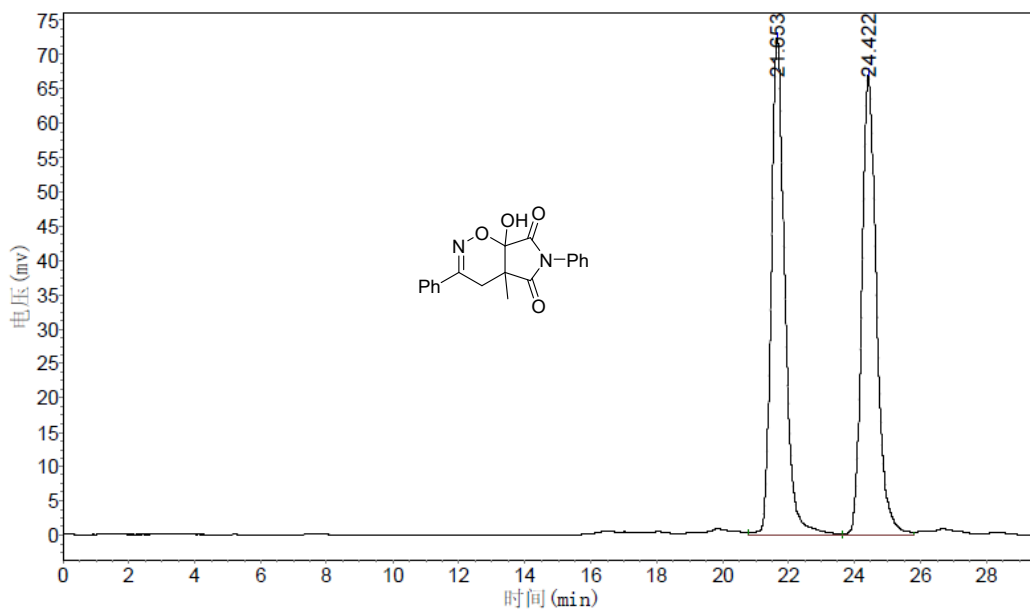

| Peak# | Ret. Time (min) | Height (mV*sec) | Area (mv)   | Area (%) |
|-------|-----------------|-----------------|-------------|----------|
| 1     | 21.653          | 72252.688       | 2048823.875 | 49.7021  |
| 2     | 24.422          | 67011.359       | 2073383.750 | 50.2979  |

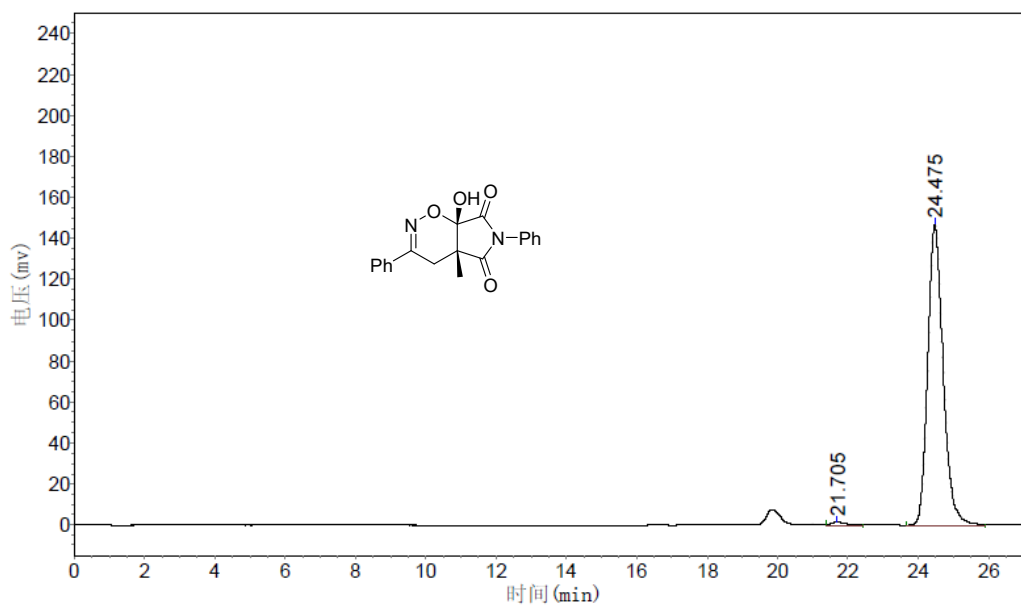

| Peak# | Ret. Time (min) | Height (mV*sec) | Area (mv)   | Area (%) |
|-------|-----------------|-----------------|-------------|----------|
| 1     | 21.705          | 1283.919        | 36266.129   | 0.8015   |
| 2     | 24.475          | 146443.328      | 4457390.000 | 98.5066  |

Chiralpak IC, n-hexane/isopropanol = 80/20, flow rate 1.0 mL/min,  $\lambda = 254$  nm,  $t_{\text{minor}} = 21$  min,  $t_{\text{major}} = 24$  min.

30a

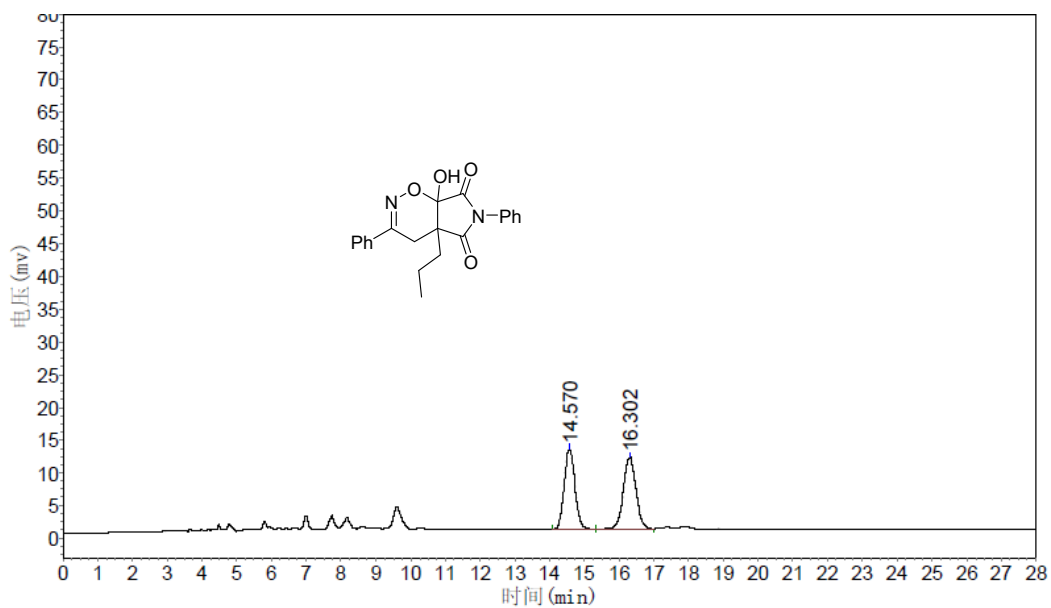

| Peak# | Ret. Time (min) | Height (mV*sec) | Area (mv)  | Area (%) |
|-------|-----------------|-----------------|------------|----------|
| 1     | 14.570          | 12128.607       | 261522.797 | 49.2072  |
| 2     | 16.302          | 10836.230       | 269949.438 | 50.7928  |

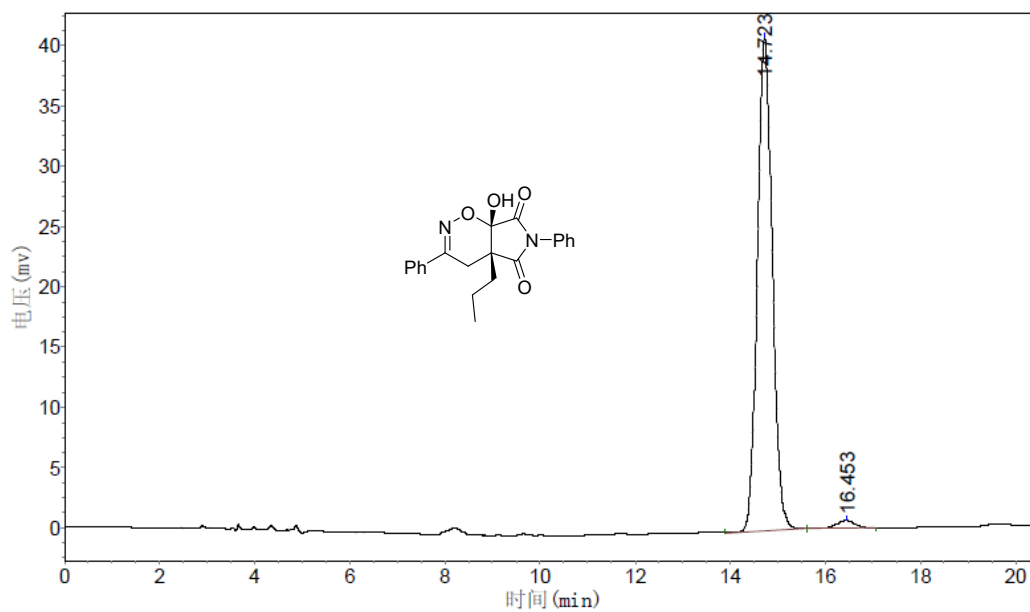

| Peak# | Ret. Time (min) | Height (mV*sec) | Area (mv)  | Area (%) |
|-------|-----------------|-----------------|------------|----------|
| 1     | 14.723          | 40848.457       | 890202.313 | 98.2208  |
| 2     | 16.453          | 602.189         | 16124.916  | 1.7791   |

Chiralpak AD-H, n-hexane/isopropanol = 80/20, flow rate 1.0 mL/min,  $\lambda = 254$  nm,  $t_{\text{major}} = 14$  min,  $t_{\text{minor}} = 16$  min

3pa

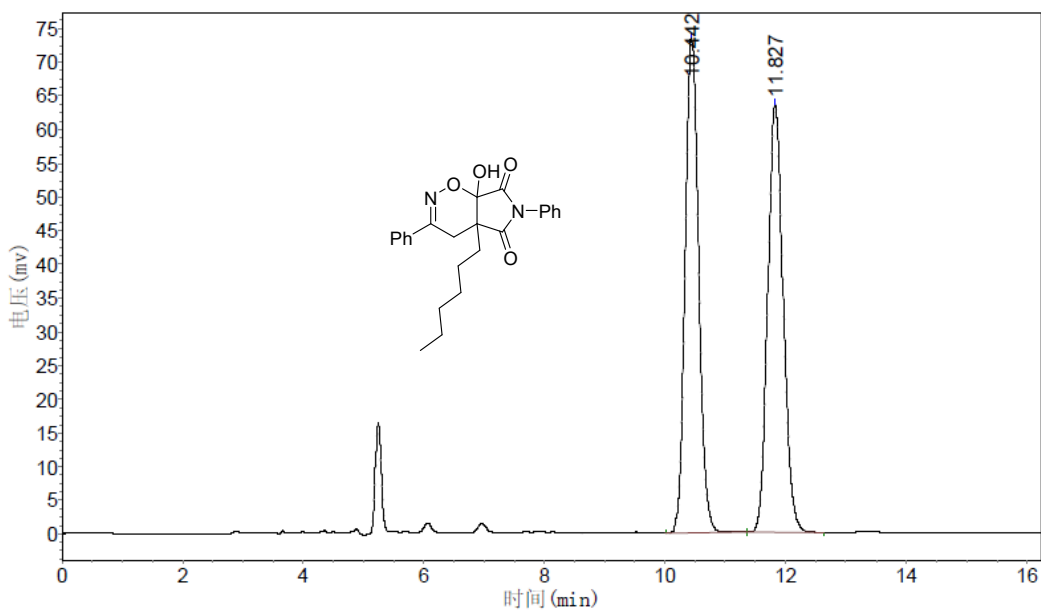

| Peak# | Ret. Time (min) | Height (mV*sec) | Area (mv)   | Area (%) |
|-------|-----------------|-----------------|-------------|----------|
| 1     | 10.442          | 73451.016       | 1139727.125 | 49.9140  |
| 2     | 11.827          | 63522.500       | 1137818.500 | 50.0860  |

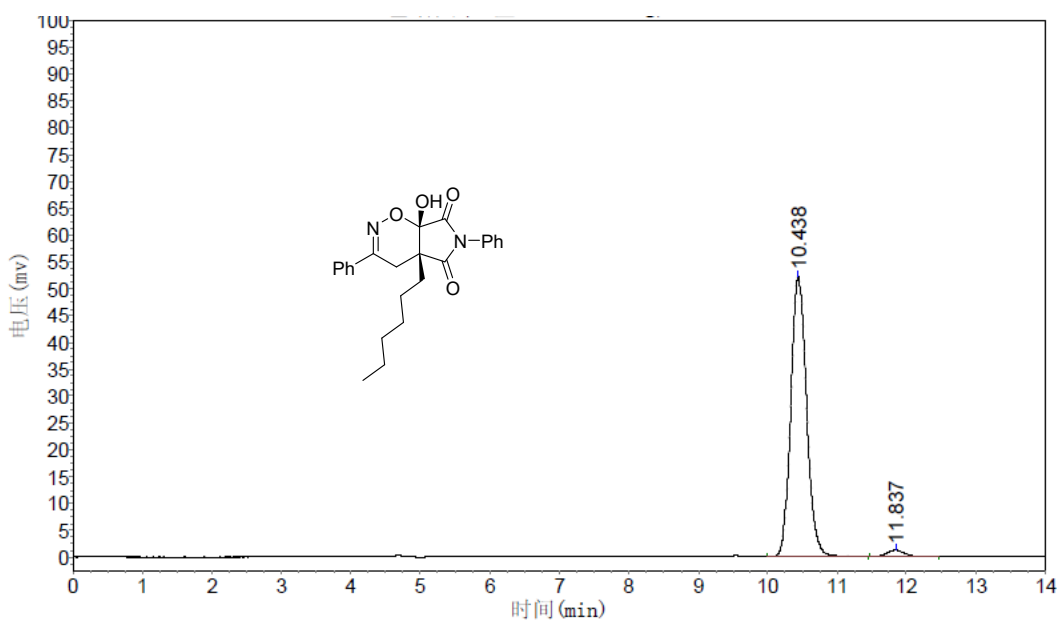

| Peak# | Ret. Time (min) | Height (mV*sec) | Area (mv)  | Area (%) |
|-------|-----------------|-----------------|------------|----------|
| 1     | 10.438          | 52272.051       | 828559.438 | 97.4072  |
| 2     | 11.837          | 1191.046        | 22054.381  | 2.5928   |

Chiralpak AD-H, n-hexane/isopropanol = 80/20, flow rate 1.0 mL/min,  $\lambda = 254$  nm,  $t_{\text{major}} = 10$  min,  $t_{\text{minor}} = 11$  min

**3qa**



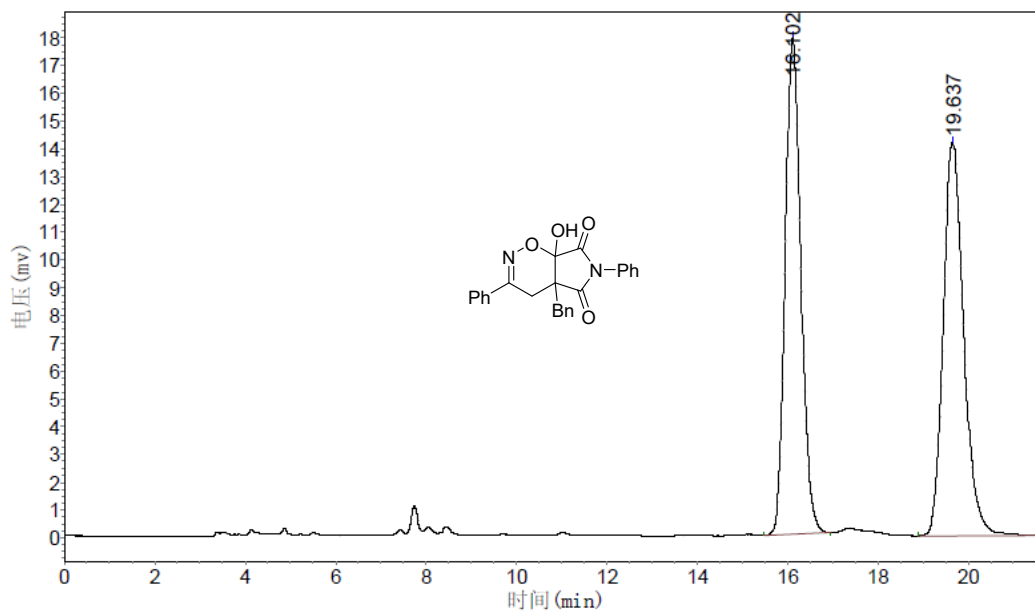

| Peak# | Ret. Time (min) | Height (mV*sec) | Area (mv)  | Area (%) |
|-------|-----------------|-----------------|------------|----------|
| 1     | 16.102          | 17908.777       | 431216.813 | 49.4127  |
| 2     | 19.637          | 14155.213       | 441466.813 | 50.5873  |

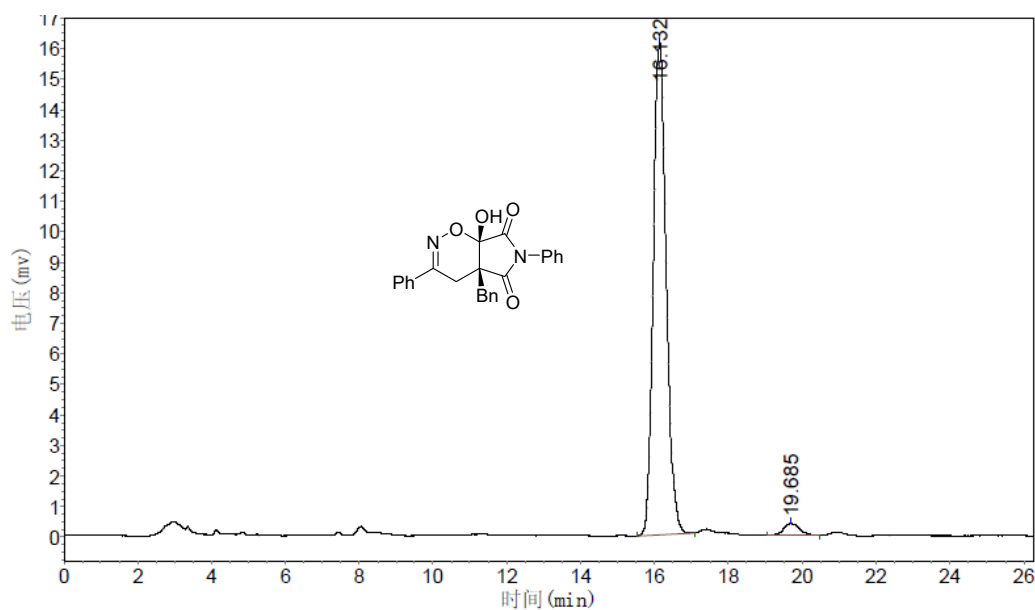

| Peak# | Ret. Time (min) | Height (mV*sec) | Area (mv)  | Area (%) |
|-------|-----------------|-----------------|------------|----------|
| 1     | 16.132          | 16121.605       | 391280.375 | 97.7128  |
| 2     | 19.685          | 356.221         | 9158.818   | 2.2872   |

Chiralpak AD-H, n-hexane/isopropanol = 80/20, flow rate 1.0 mL/min,  $\lambda = 254$  nm,  $t_{\text{major}} = 16$  min,  $t_{\text{minor}} = 19$  min

3ra

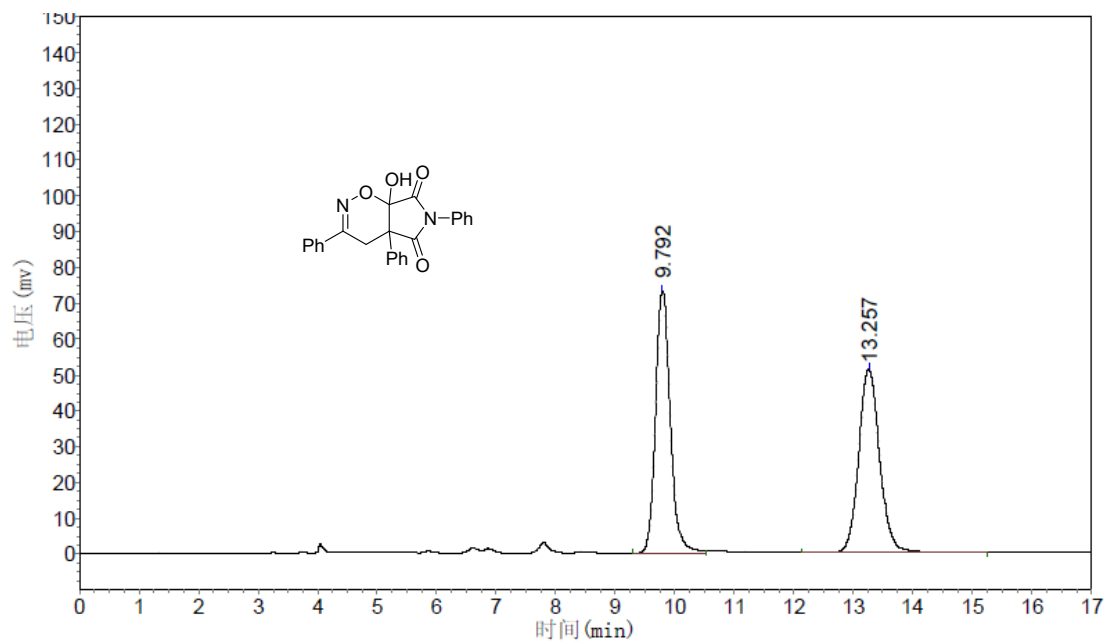

| Peak# | Ret. Time (min) | Height (mV*sec) | Area (mv)   | Area (%) |
|-------|-----------------|-----------------|-------------|----------|
| 1     | 9.792           | 73104.258       | 1246569.375 | 49.8132  |
| 2     | 13.257          | 51301.516       | 1255917.125 | 50.1868  |

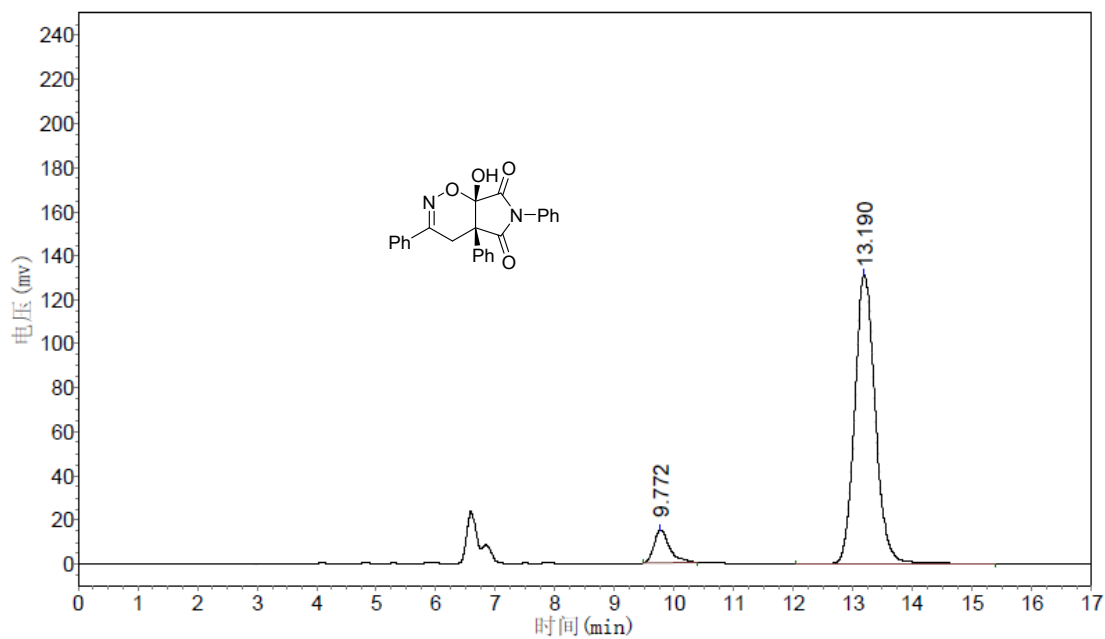

| Peak# | Ret. Time (min) | Height (mV*sec) | Area (mv)   | Area (%) |
|-------|-----------------|-----------------|-------------|----------|
| 1     | 9.772           | 15180.345       | 285753.531  | 8.3869   |
| 2     | 13.190          | 131079.125      | 3121401.250 | 91.6131  |

Chiralpak IC, n-hexane/isopropanol = 80/20, flow rate 1.0 mL/min,  $\lambda = 254$  nm,  $t_{\text{minor}} = 9$  min,  $t_{\text{major}} = 13$  min

3sa

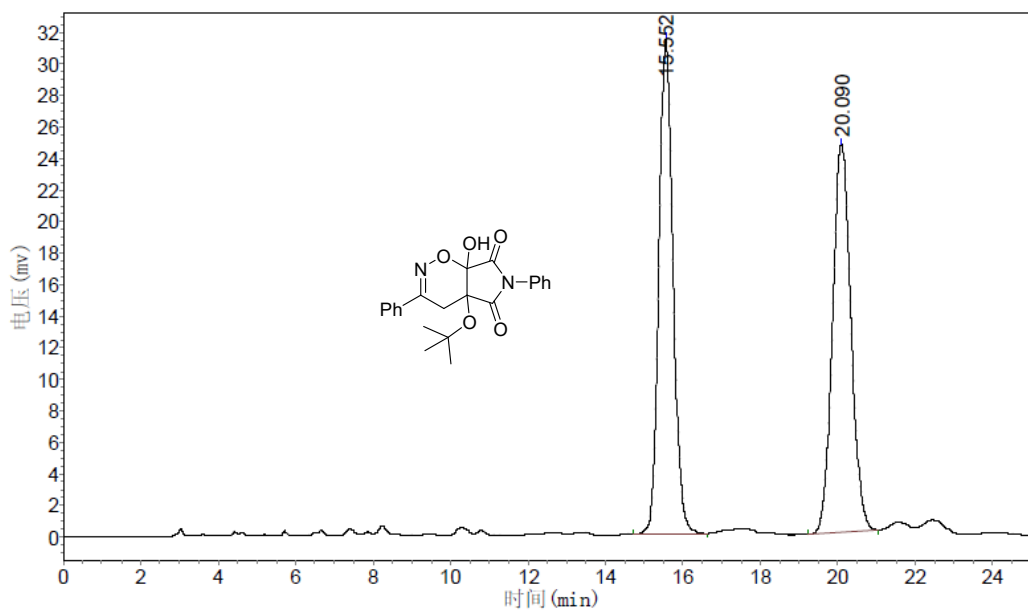

| Peak# | Ret. Time (min) | Height (mV*sec) | Area (mv)  | Area (%) |
|-------|-----------------|-----------------|------------|----------|
| 1     | 15.552          | 31398.766       | 793393.500 | 49.4143  |
| 2     | 20.090          | 24620.063       | 812199.875 | 50.5857  |

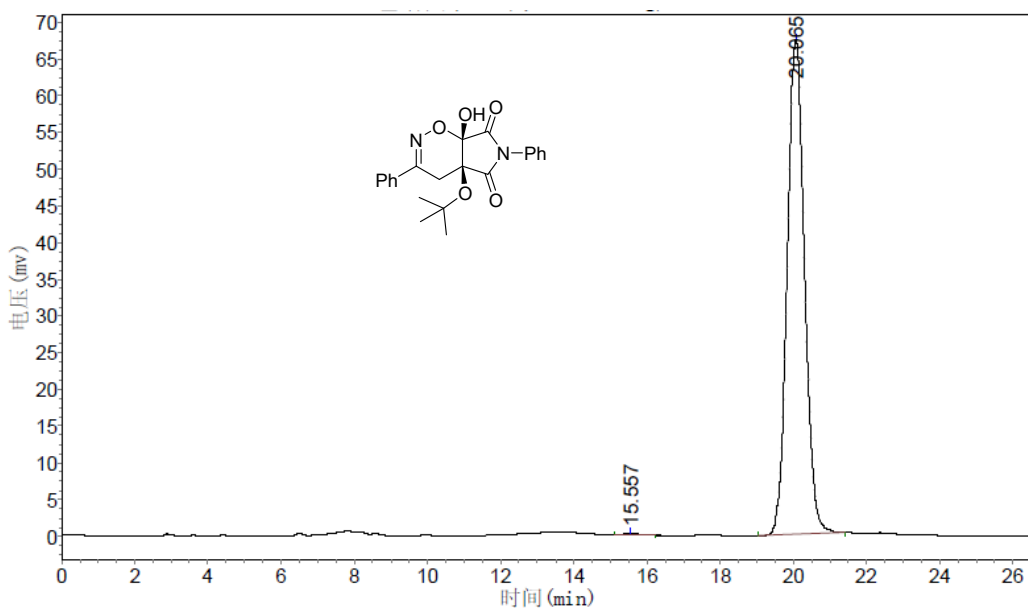

| Peak# | Ret. Time (min) | Height (mV*sec) | Area (mv)   | Area (%) |
|-------|-----------------|-----------------|-------------|----------|
| 1     | 15.557          | 313.556         | 7675.550    | 0.3473   |
| 2     | 20.065          | 67253.539       | 2202280.750 | 99.6527  |

Chiralpak AD-H, n-hexane/isopropanol = 80/20, flow rate 1.0 mL/min,  $\lambda = 254$  nm,  $t_{\text{minor}} = 15$  min,  $t_{\text{major}} = 20$  min

3ab

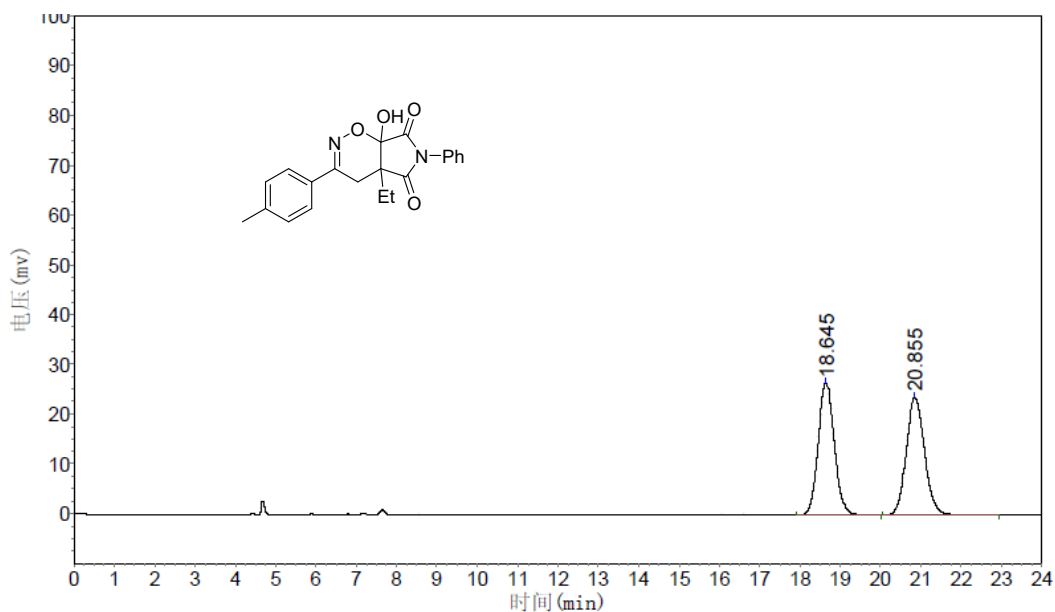

| Peak# | Ret. Time (min) | Height (mV*sec) | Area (mv)  | Area (%) |
|-------|-----------------|-----------------|------------|----------|
| 1     | 18.645          | 26470.850       | 737368.875 | 50.1576  |
| 2     | 20.855          | 23466.025       | 732733.875 | 49.8424  |

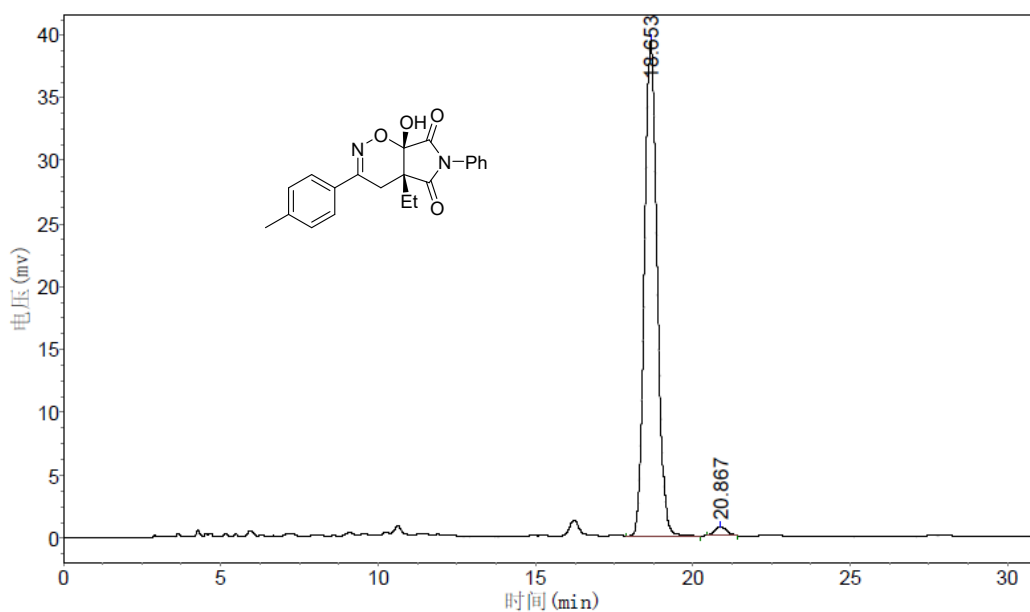

| Peak# | Ret. Time (min) | Height (mV*sec) | Area (mv)   | Area (%) |
|-------|-----------------|-----------------|-------------|----------|
| 1     | 18.653          | 39438.063       | 1098108.125 | 98.5491  |
| 2     | 20.867          | 624.001         | 16167.441   | 1.4509   |

Chiralpak AD-H, n-hexane/isopropanol = 80/20, flow rate 1.0 mL/min,  $\lambda = 254$  nm,  $t_{\text{major}} = 18$  min,  $t_{\text{minor}} = 20$  min

## 3ac

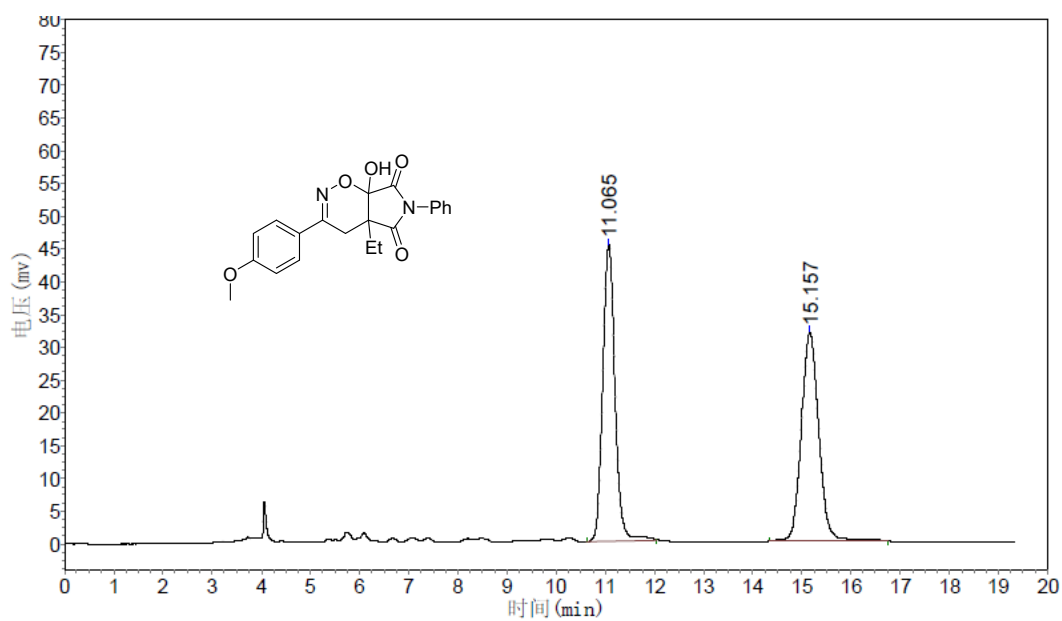

| Peak# | Ret. Time (min) | Height (mV*sec) | Area (mv)  | Area (%) |
|-------|-----------------|-----------------|------------|----------|
| 1     | 11.065          | 45270.203       | 774898.125 | 50.0481  |
| 2     | 15.157          | 31945.744       | 773409.125 | 49.9519  |

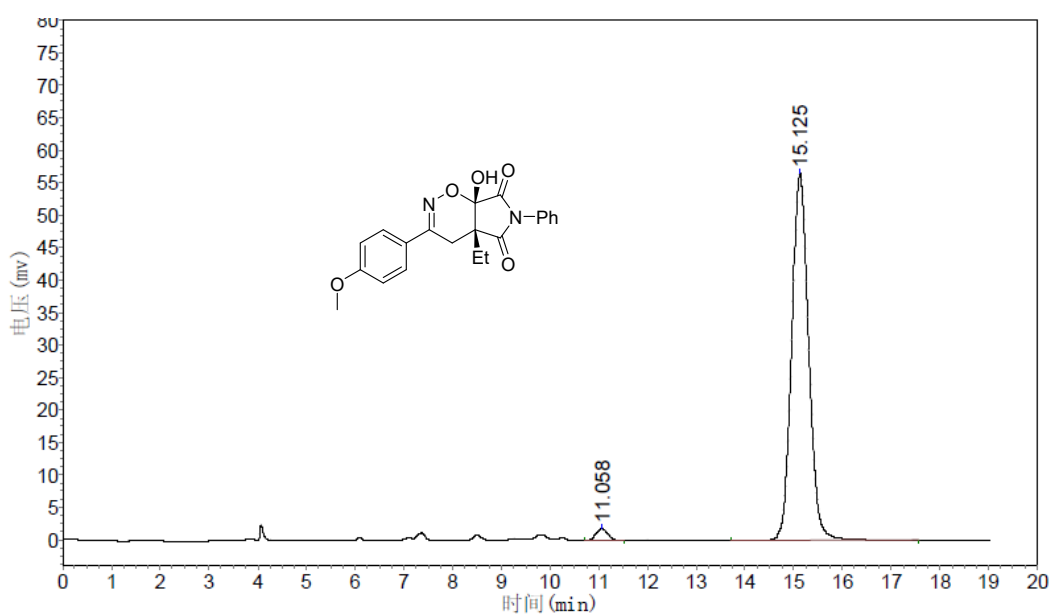

| Peak# | Ret. Time (min) | Height (mV*sec) | Area (mv)   | Area (%) |
|-------|-----------------|-----------------|-------------|----------|
| 1     | 11.058          | 1769.000        | 30196.000   | 2.1706   |
| 2     | 15.125          | 56402.270       | 1360957.250 | 97.8294  |

Chiralpak IC, n-hexane/isopropanol = 90/10, flow rate 1.0 mL/min,  $\lambda = 254$  nm,  $t_{\text{minor}} = 11$  min,  $t_{\text{major}} = 15$  min

## 3ad

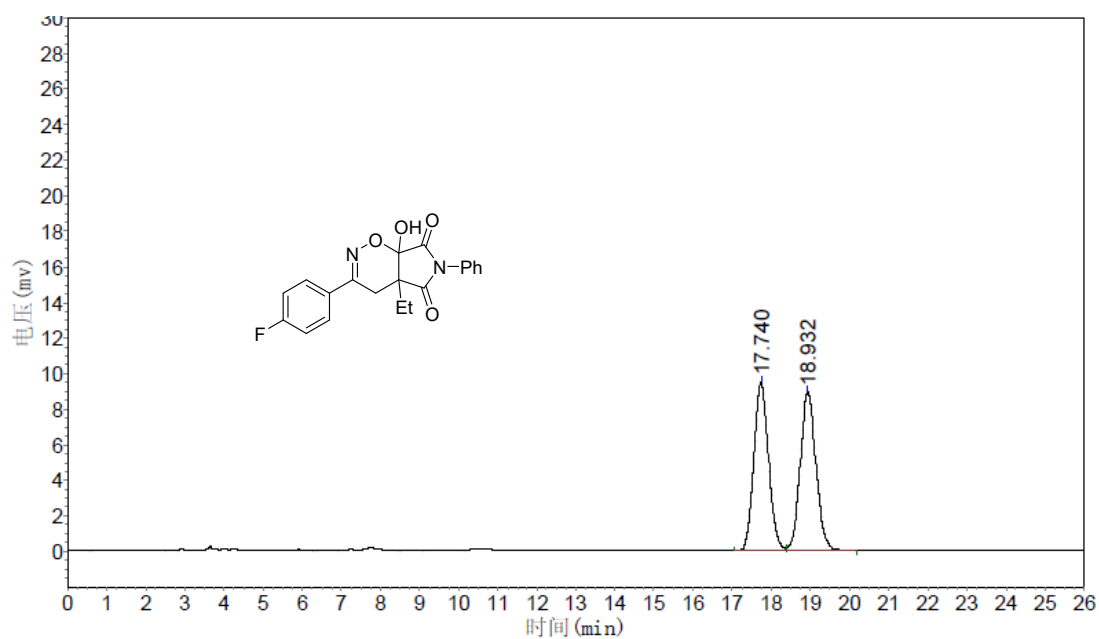

| Peak# | Ret. Time (min) | Height (mV*sec) | Area (mv)  | Area (%) |
|-------|-----------------|-----------------|------------|----------|
| 1     | 17.740          | 9493.085        | 247566.344 | 49.8704  |
| 2     | 18.932          | 8897.257        | 248853.469 | 50.1296  |

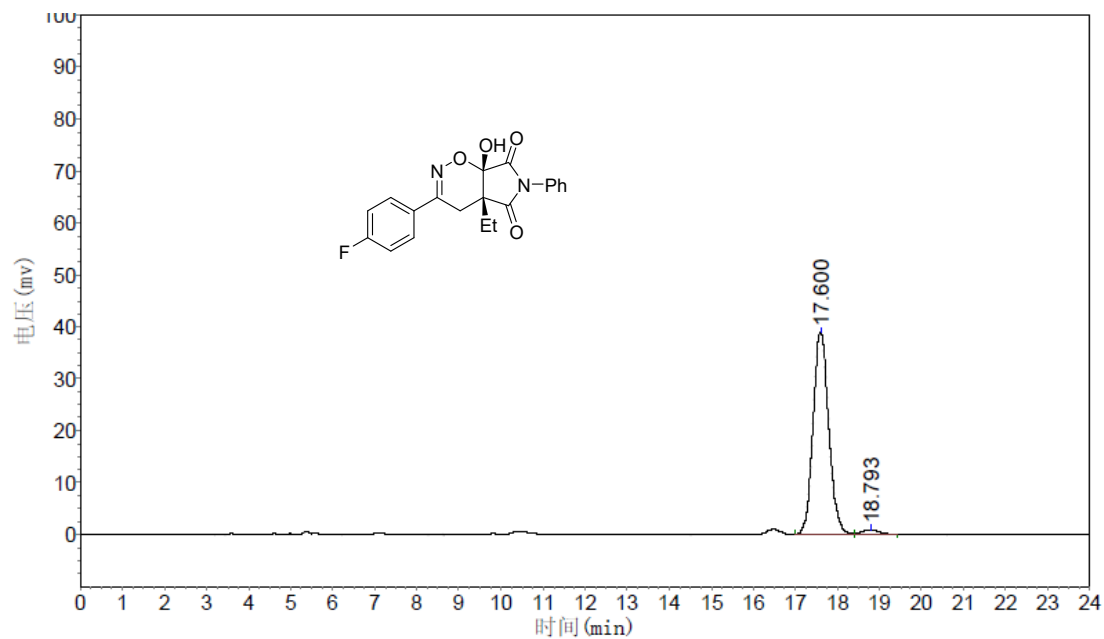

| Peak# | Ret. Time (min) | Height (mV*sec) | Area (mv)   | Area (%) |
|-------|-----------------|-----------------|-------------|----------|
| 1     | 17.600          | 38782.379       | 1006869.375 | 97.5698  |
| 2     | 18.793          | 876.622         | 25078.043   | 2.4302   |

Chiralpak AD-H, n-hexane/isopropanol = 90/10, flow rate 1.0 mL/min,  $\lambda = 254$  nm,  $t_{\text{major}} = 17$  min, = 18 min

3ae

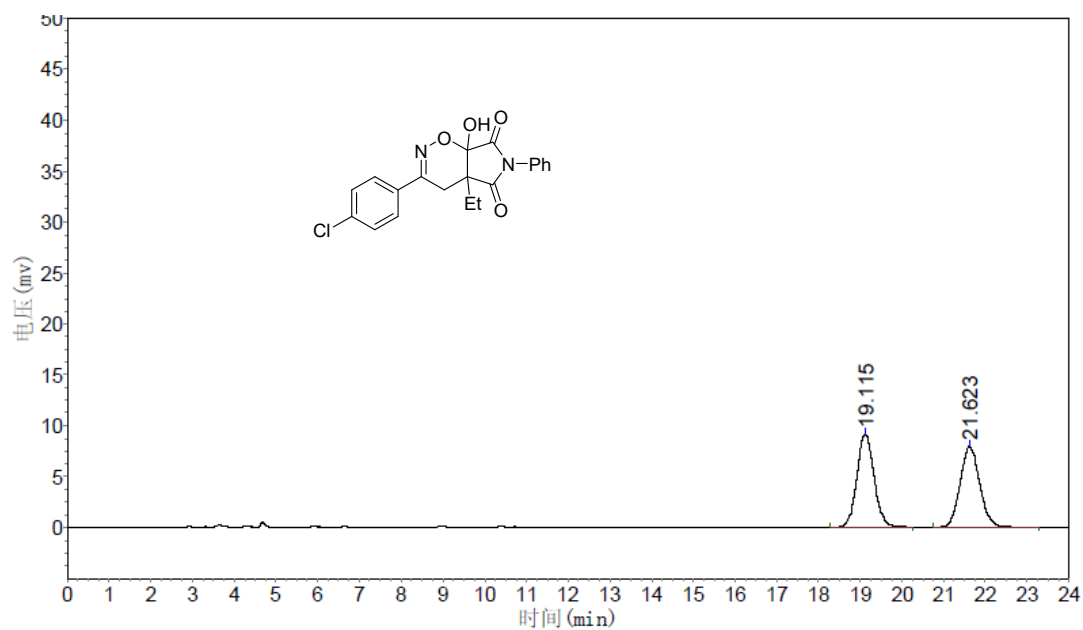

| Peak# | Ret. Time (min) | Height (mV*sec) | Area (mv)  | Area (%) |
|-------|-----------------|-----------------|------------|----------|
| 1     | 19.115          | 9086.468        | 260287.656 | 50.4270  |
| 2     | 21.623          | 7900.000        | 255880.000 | 49.5730  |

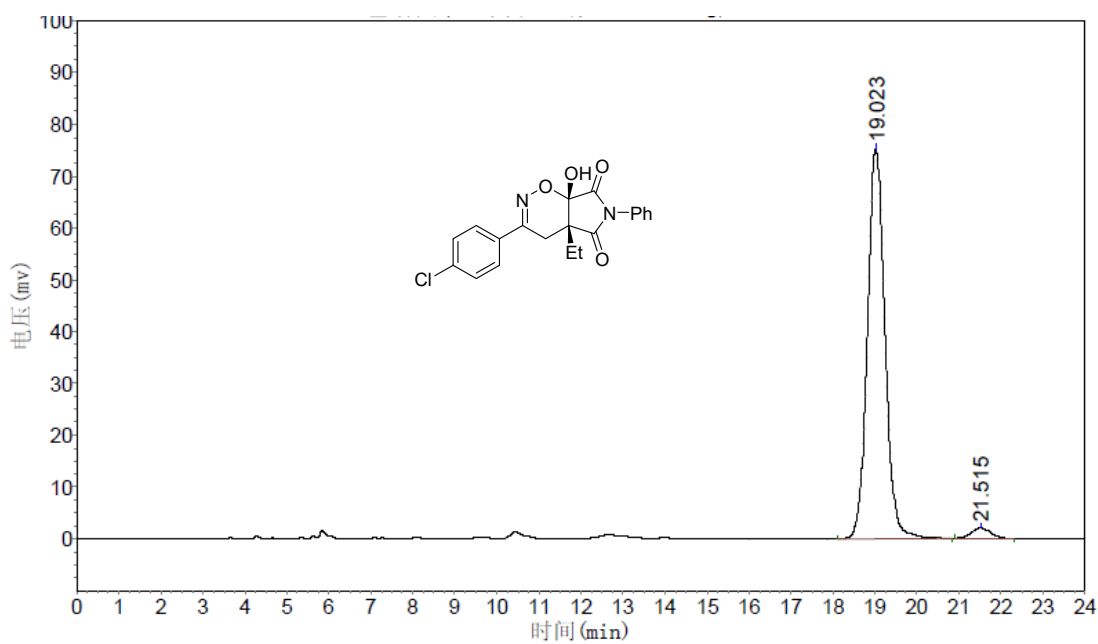

| Peak# | Ret. Time (min) | Height (mV*sec) | Area (mv)   | Area (%) |
|-------|-----------------|-----------------|-------------|----------|
| 1     | 19.023          | 75157.156       | 2174424.000 | 97.3020  |
| 2     | 21.515          | 1908.526        | 60292.898   | 2.6980   |

Chiralpak AD-H, n-hexane/isopropanol = 80/20, flow rate 1.0 mL/min,  $\lambda = 254$  nm,  $t_{\text{major}} = 19$  min,  $t_{\text{minor}} = 21$  min

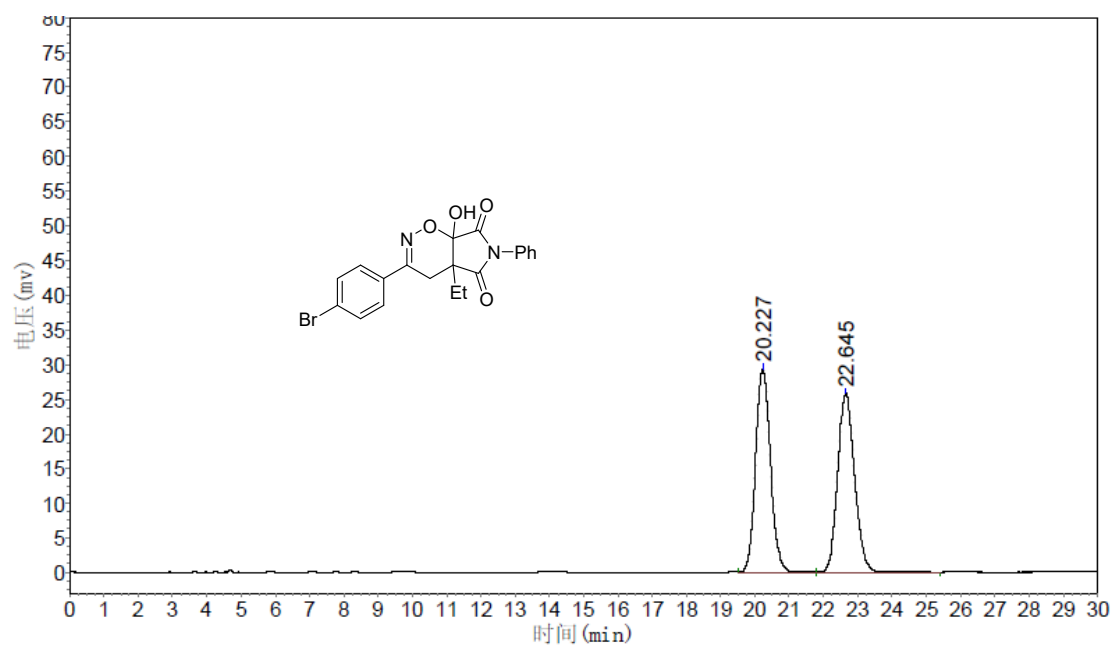

| Peak# | Ret. Time (min) | Height (mV*sec) | Area (mv)  | Area (%) |
|-------|-----------------|-----------------|------------|----------|
| 1     | 20.227          | 29232.371       | 882371.813 | 49.9642  |
| 2     | 22.645          | 25734.191       | 883636.375 | 50.0358  |

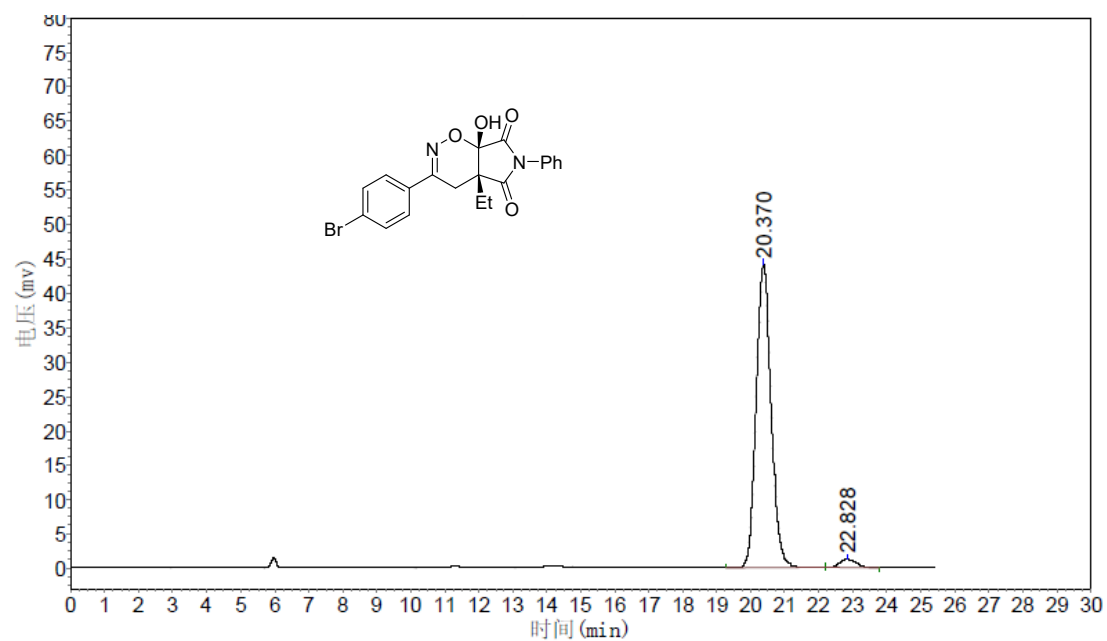

| Peak# | Ret. Time (min) | Height (mV*sec) | Area (mv)   | Area (%) |
|-------|-----------------|-----------------|-------------|----------|
| 1     | 20.370          | 44029.871       | 1344894.750 | 97.3948  |
| 2     | 22.828          | 1046.405        | 35974.094   | 2.6052   |

Chiralpak AD-H, n-hexane/isopropanol = 80/20, flow rate 1.0 mL/min,  $\lambda = 254$  nm,  $t_{\text{major}} = 20$  min,  $t_{\text{minor}} = 22$  min

3ag



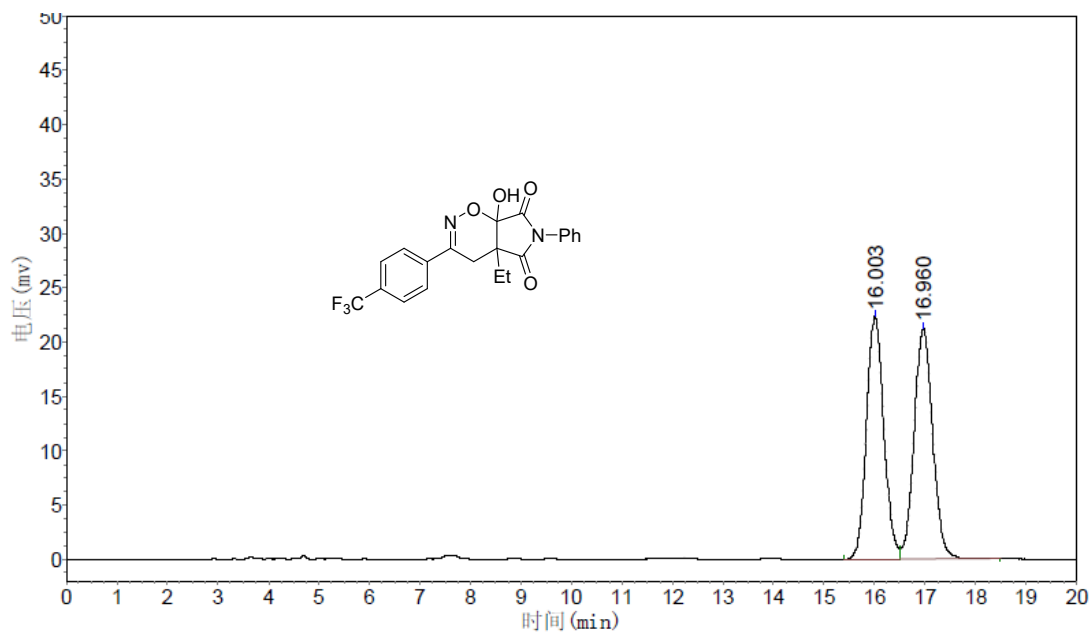

| Peak# | Ret. Time (min) | Height (mV*sec) | Area (mv)  | Area (%) |
|-------|-----------------|-----------------|------------|----------|
| 1     | 16.003          | 22316.473       | 530962.313 | 49.6120  |
| 2     | 16.960          | 21236.707       | 539268.063 | 50.3880  |

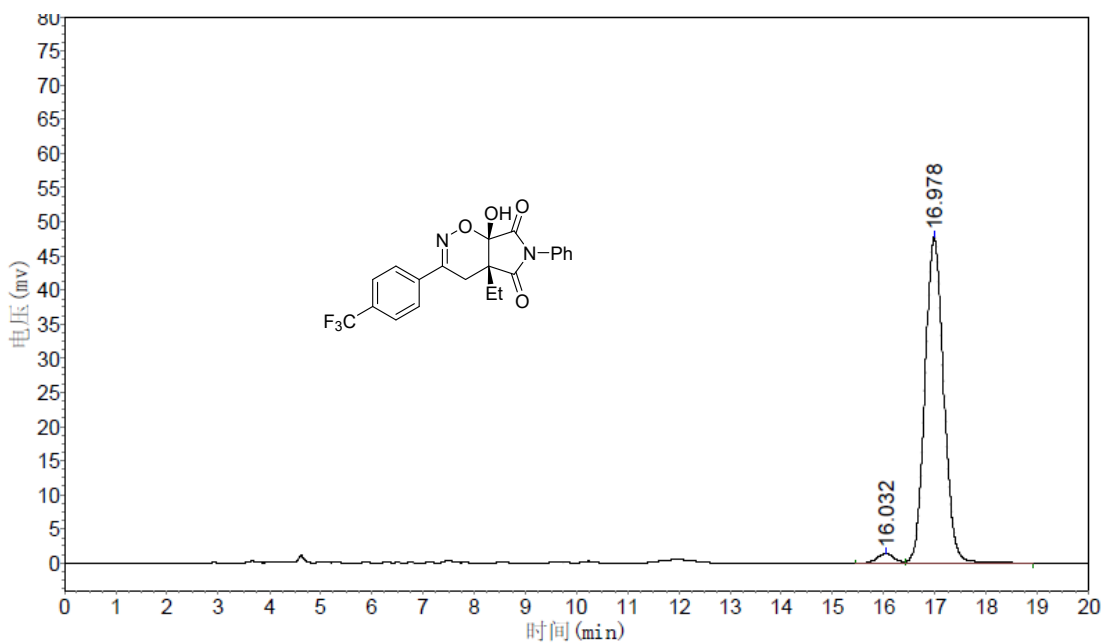

| Peak# | Ret. Time (min) | Height (mV*sec) | Area (mv)   | Area (%) |
|-------|-----------------|-----------------|-------------|----------|
| 1     | 16.032          | 1412.961        | 33307.188   | 2.6622   |
| 2     | 16.978          | 47826.738       | 1217798.750 | 97.3378  |

Chiralpak AD-H, n-hexane/isopropanol = 80/20, flow rate 1.0 mL/min,  $\lambda = 254$  nm,  $t_{\text{minor}} = 16$  min,  $t_{\text{major}} = 17$  min

3ah

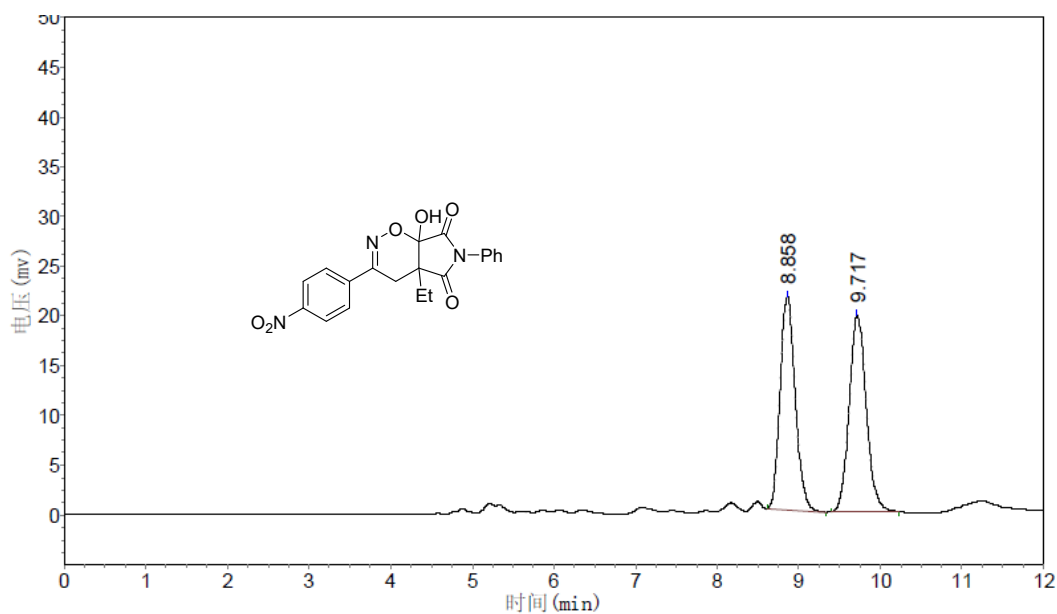

| Peak# | Ret. Time (min) | Height (mV*sec) | Area (mv)  | Area (%) |
|-------|-----------------|-----------------|------------|----------|
| 1     | 8.858           | 21475.223       | 277353.344 | 48.9156  |
| 2     | 9.717           | 19766.707       | 289650.906 | 51.0844  |

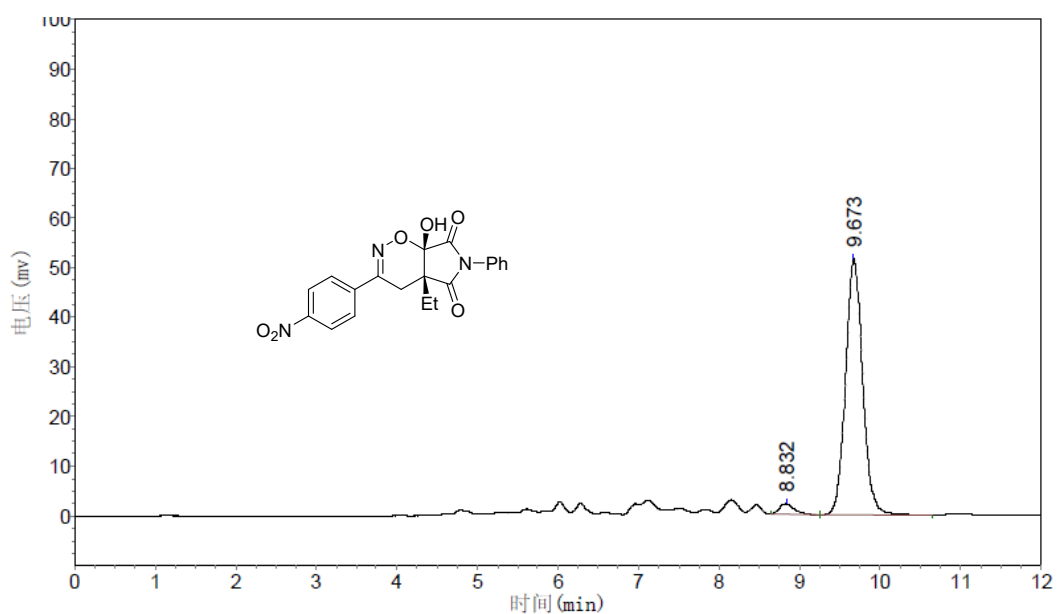

| Peak# | Ret. Time (min) | Height (mV*sec) | Area (mv)  | Area (%) |
|-------|-----------------|-----------------|------------|----------|
| 1     | 8.832           | 2048.630        | 26801.600  | 3.3951   |
| 2     | 9.673           | 51449.855       | 762610.375 | 96.6049  |

Chiralpak IC, n-hexane/isopropanol = 50/50, flow rate 1.0 mL/min,  $\lambda = 254$  nm,  $t_{\text{minor}} = 8$  min,  $t_{\text{major}} = 9$  min

## 3ai

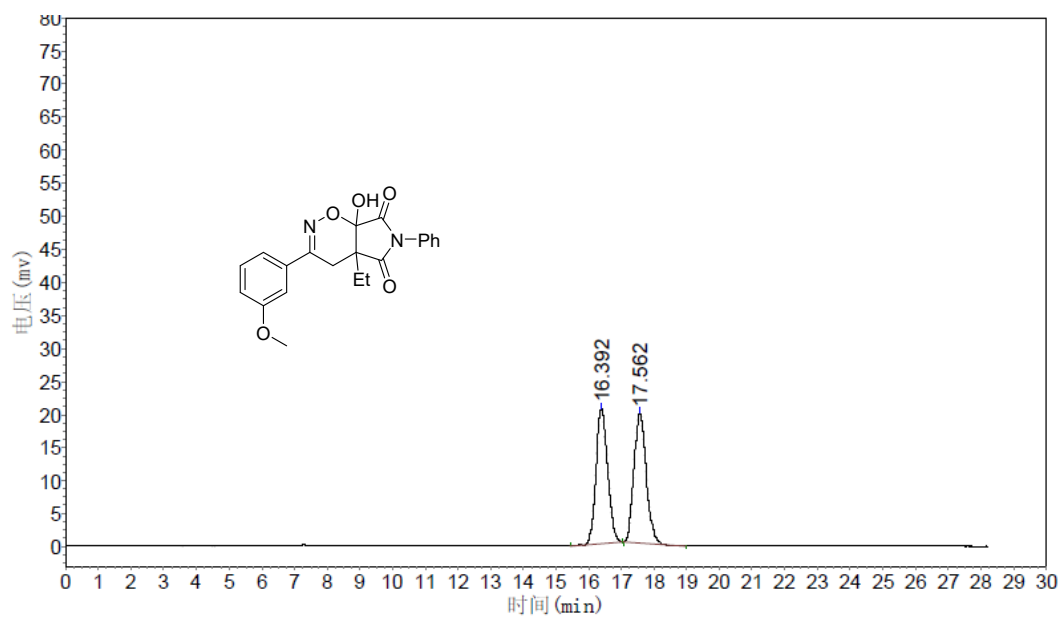

| Peak# | Ret. Time (min) | Height (mV*sec) | Area (mv)  | Area (%) |
|-------|-----------------|-----------------|------------|----------|
| 1     | 16.392          | 20801.037       | 536615.125 | 49.4914  |
| 2     | 17.562          | 20134.582       | 547644.188 | 50.5086  |

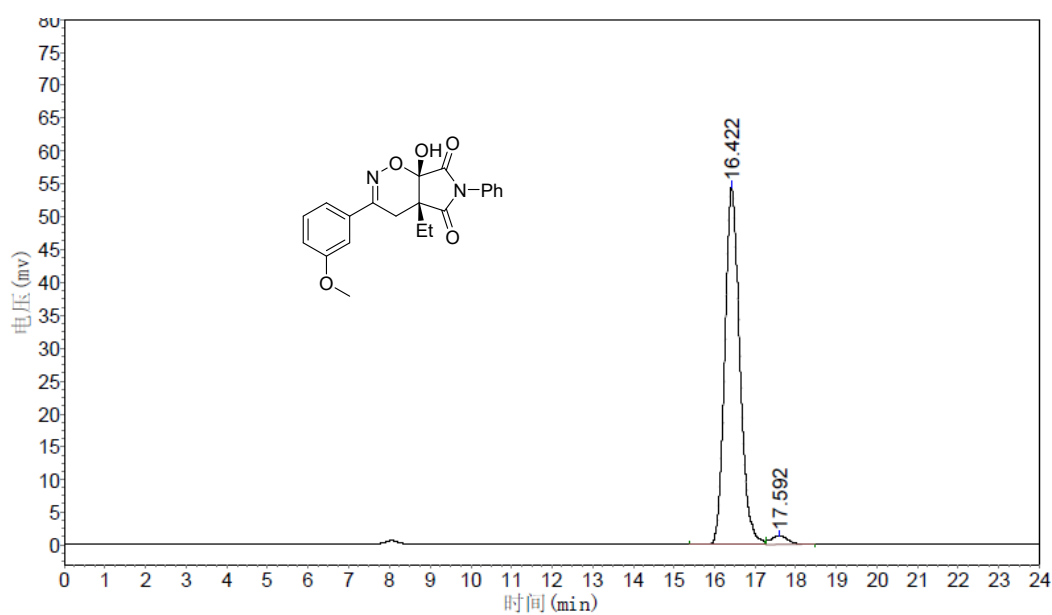

| Peak# | Ret. Time (min) | Height (mV*sec) | Area (mv)   | Area (%) |
|-------|-----------------|-----------------|-------------|----------|
| 1     | 16.422          | 54378.328       | 1393724.500 | 97.5171  |
| 2     | 17.592          | 1203.044        | 35485.555   | 2.4829   |

Chiralpak AD-H, n-hexane/isopropanol = 80/20, flow rate 1.0 mL/min,  $\lambda = 254$  nm,  $t_{\text{minor}} = 16$  min,  $t_{\text{major}} = 17$  min

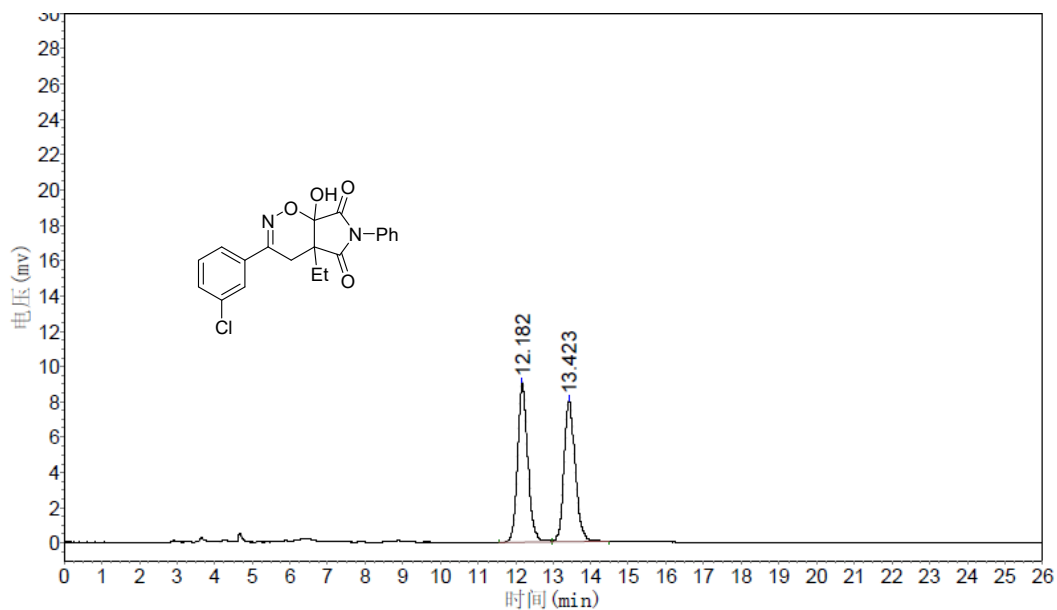

| Peak# | Ret. Time (min) | Height (mV*sec) | Area (mv)  | Area (%) |
|-------|-----------------|-----------------|------------|----------|
| 1     | 12.182          | 9020.145        | 172430.453 | 50.8485  |
| 2     | 13.423          | 7974.020        | 166675.609 | 49.1515  |

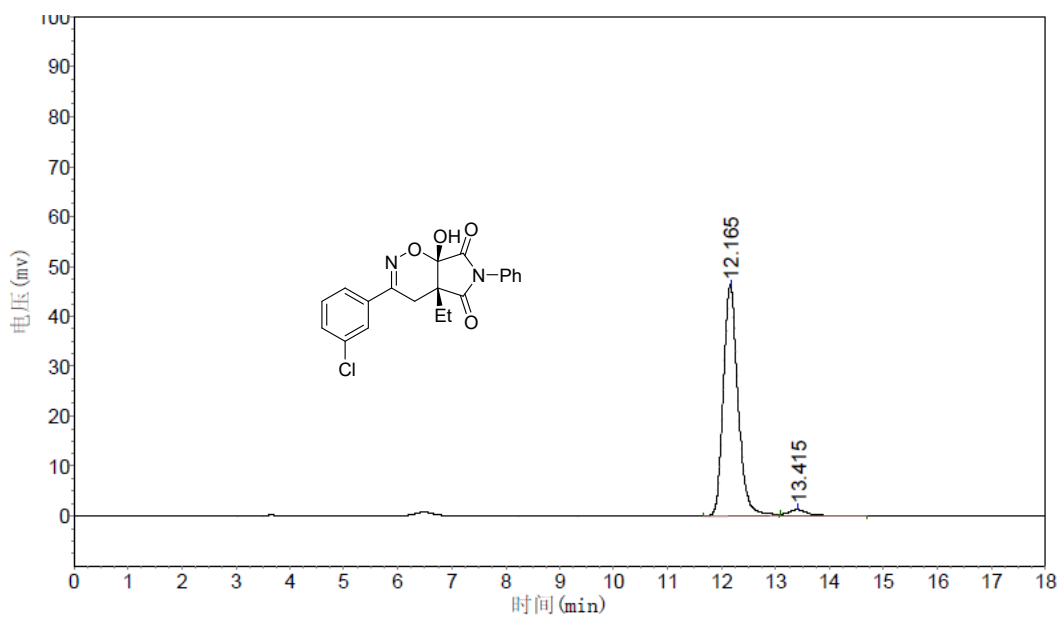

| Peak# | Ret. Time (min) | Height (mV*sec) | Area (mv)  | Area (%) |
|-------|-----------------|-----------------|------------|----------|
| 1     | 12.165          | 46104.246       | 868950.563 | 96.7914  |
| 2     | 13.415          | 1152.799        | 28805.061  | 3.2086   |

Chiralpak AD-H, n-hexane/isopropanol = 90/10, flow rate 1.0 mL/min,  $\lambda = 254$  nm,  $t_{\text{major}} = 12$  min,  $t_{\text{minor}} = 13$  min

3ak

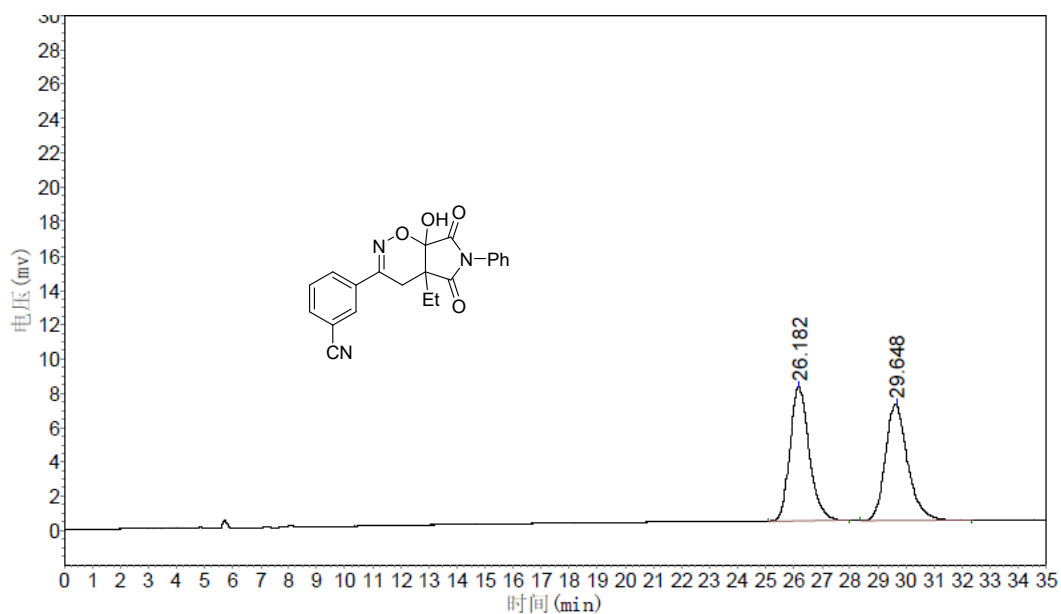

| Peak# | Ret. Time (min) | Height (mV*sec) | Area (mv)  | Area (%) |
|-------|-----------------|-----------------|------------|----------|
| 1     | 26.182          | 7823.649        | 373985.000 | 50.0594  |
| 2     | 29.648          | 6761.462        | 373097.000 | 49.9406  |

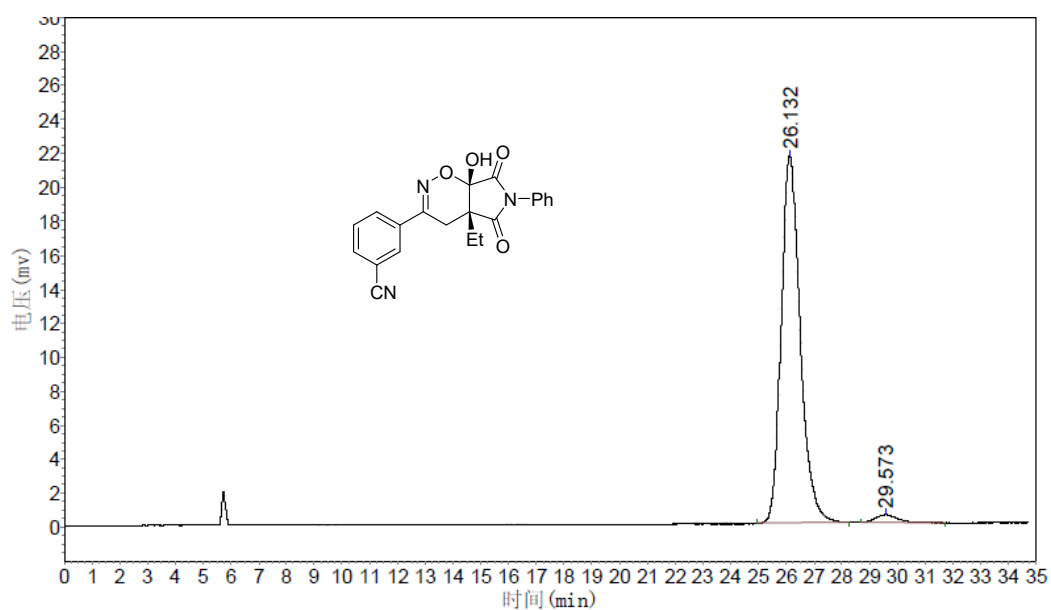

| Peak# | Ret. Time (min) | Height (mV*sec) | Area (mv)   | Area (%) |
|-------|-----------------|-----------------|-------------|----------|
| 1     | 26.132          | 21614.488       | 1031086.250 | 97.5946  |
| 2     | 29.573          | 478.637         | 25413.500   | 2.4054   |

Chiralpak AD-H, n-hexane/isopropanol = 90/10, flow rate 1.0 mL/min,  $\lambda = 254$  nm,  $t_{\text{major}} = 26$  min,  $t_{\text{minor}} = 29$  min

## 3a1

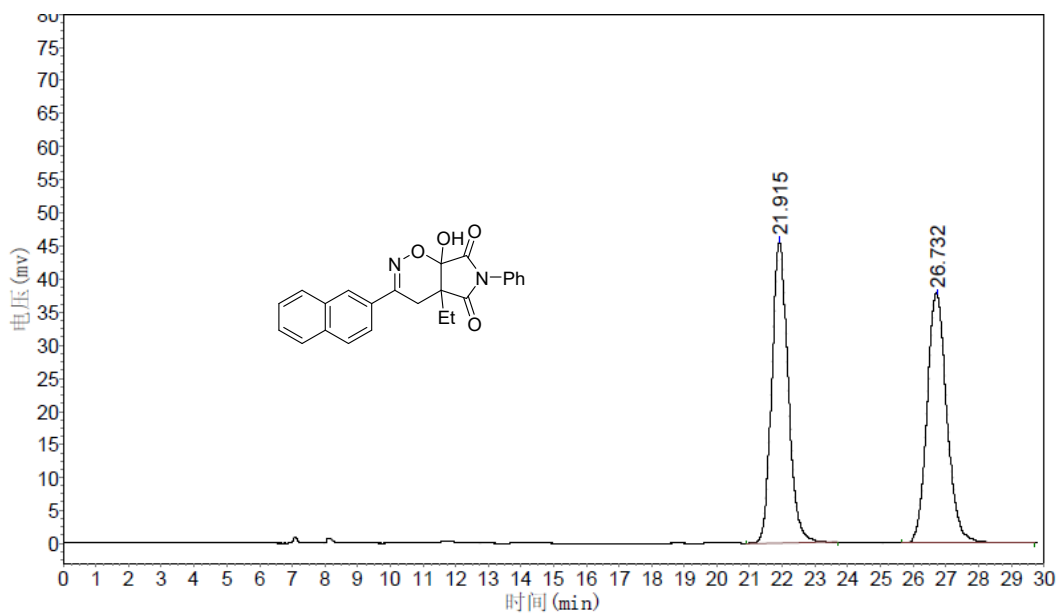

| Peak# | Ret. Time (min) | Height (mV*sec) | Area (mv)   | Area (%) |
|-------|-----------------|-----------------|-------------|----------|
| 1     | 21.915          | 45490.969       | 1578999.250 | 49.8418  |
| 2     | 26.732          | 37647.688       | 1589025.750 | 50.1582  |

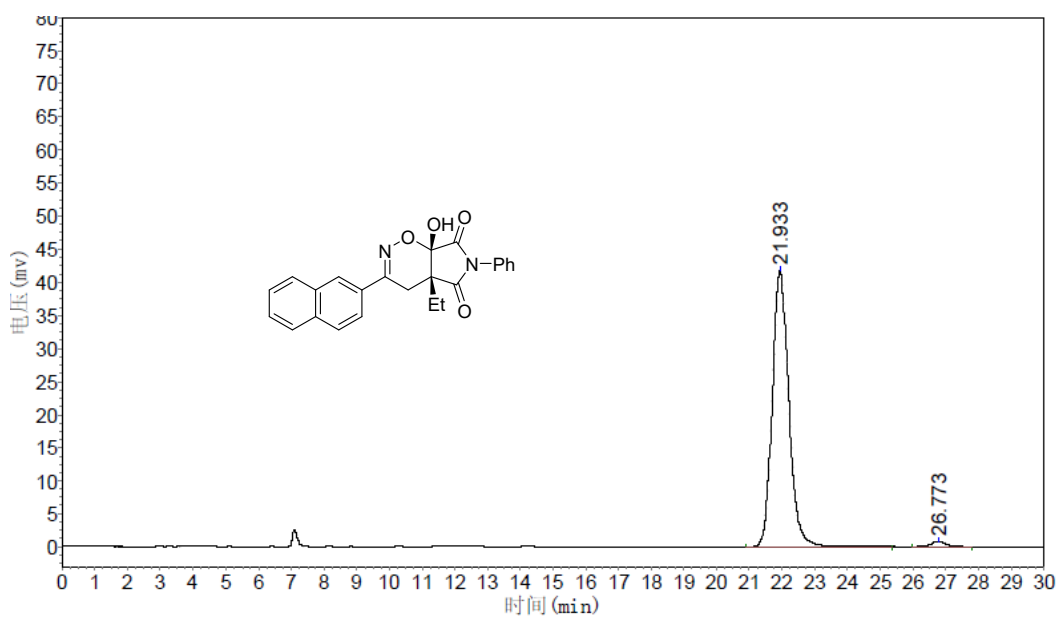

| Peak# | Ret. Time (min) | Height (mV*sec) | Area (mv)   | Area (%) |
|-------|-----------------|-----------------|-------------|----------|
| 1     | 21.933          | 41652.414       | 1471149.375 | 98.0886  |
| 2     | 26.773          | 698.556         | 28668.031   | 1.9114   |

Chiralpak AD-H, n-hexane/isopropanol = 80/20, flow rate 1.0 mL/min,  $\lambda = 254$  nm,  $t_{\text{major}} = 22$  min,  $t_{\text{minor}} = 26$  min

## 3am

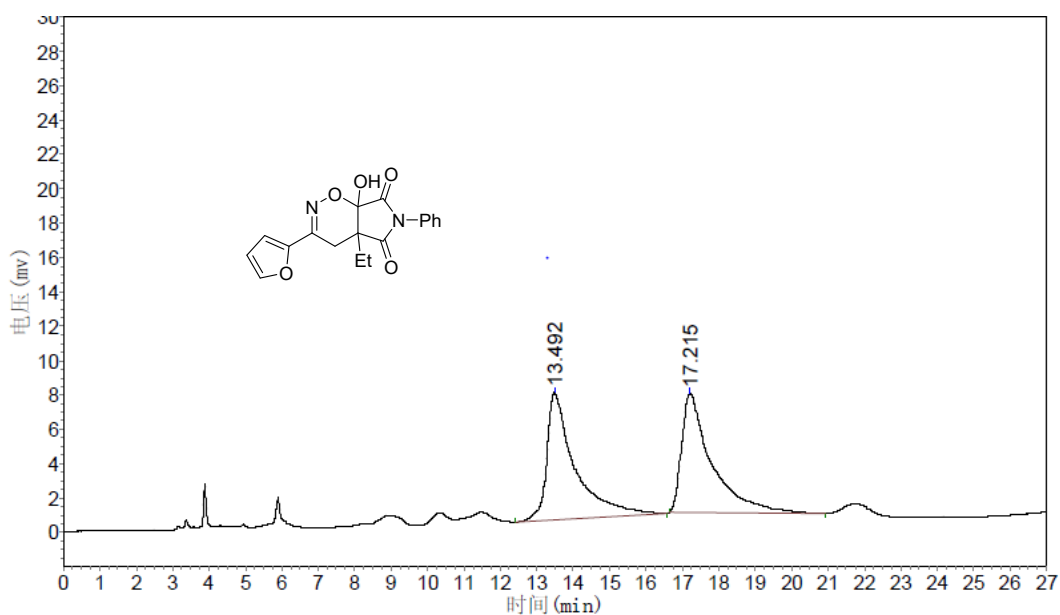

| Peak# | Ret. Time (min) | Height (mV*sec) | Area (mv)  | Area (%) |
|-------|-----------------|-----------------|------------|----------|
| 1     | 13.492          | 7505.857        | 429690.031 | 49.3515  |
| 2     | 17.215          | 7199.009        | 440981.813 | 50.6484  |

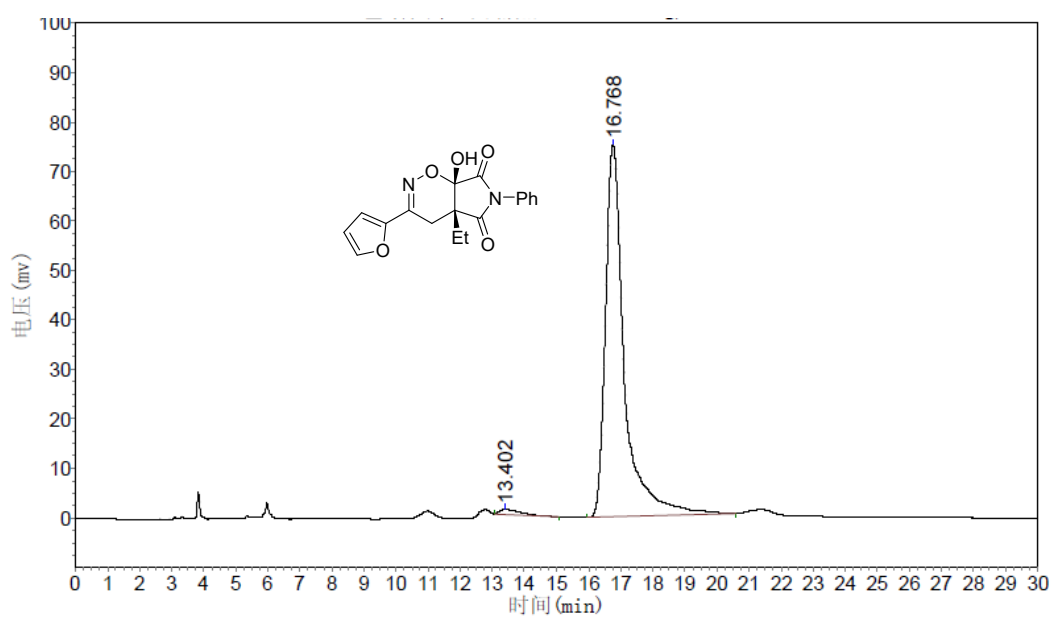

| Peak# | Ret. Time (min) | Height (mV*sec) | Area (mv)   | Area (%) |
|-------|-----------------|-----------------|-------------|----------|
| 1     | 13.402          | 1123.190        | 49357.797   | 1.4926   |
| 2     | 16.768          | 75325.406       | 3257410.750 | 98.5074  |

Chiralpak IC, n-hexane/isopropanol = 80/20, flow rate 1.0 mL/min,  $\lambda = 254$  nm,  $t_{\text{minor}} = 13$  min,  $t_{\text{major}} = 16$  min

3am'

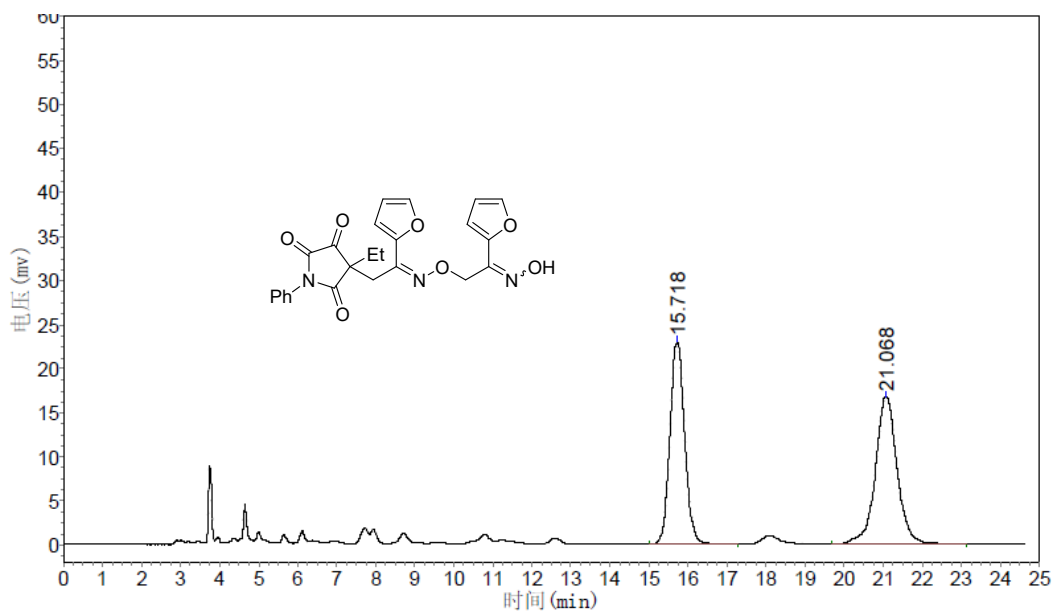

| Peak# | Ret. Time (min) | Height (mV*sec) | Area (mv)  | Area (%) |
|-------|-----------------|-----------------|------------|----------|
| 1     | 15.718          | 22908.596       | 593093.500 | 49.2011  |
| 2     | 21.068          | 16486.066       | 612353.688 | 50.7989  |

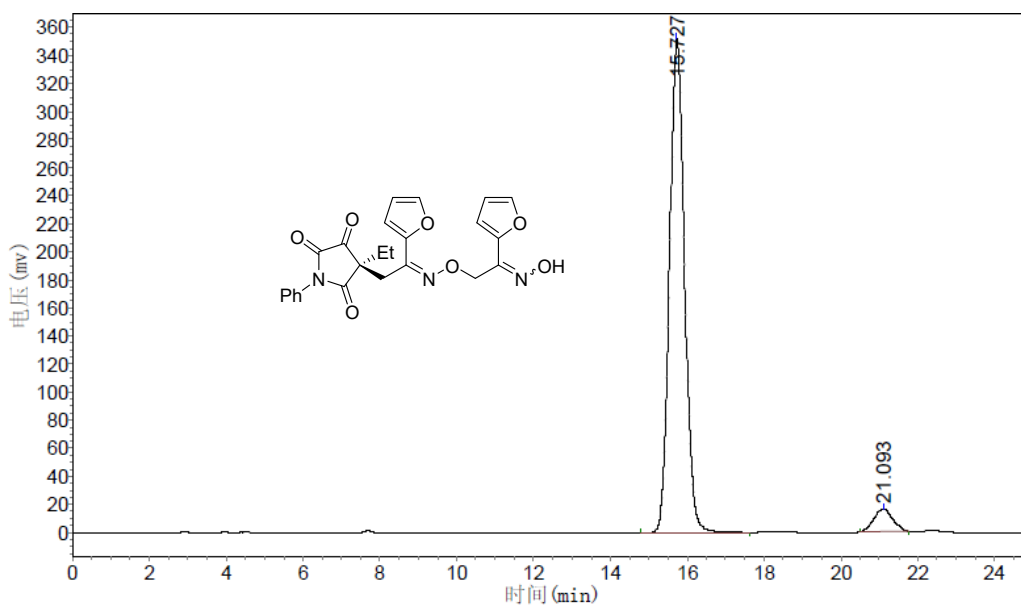

| Peak# | Ret. Time (min) | Height (mV*sec) | Area (mv)   | Area (%) |
|-------|-----------------|-----------------|-------------|----------|
| 1     | 15.727          | 351788.094      | 9526318.000 | 94.6968  |
| 2     | 21.093          | 15538.790       | 533495.313  | 5.3032   |

Chiralpak AD-H, n-hexane/isopropanol = 80/20, flow rate 1.0 mL/min,  $\lambda = 254$  nm,  $t_{\text{major}} = 15$  min,  $t_{\text{minor}} = 21$  min



3am' (2.2eq)

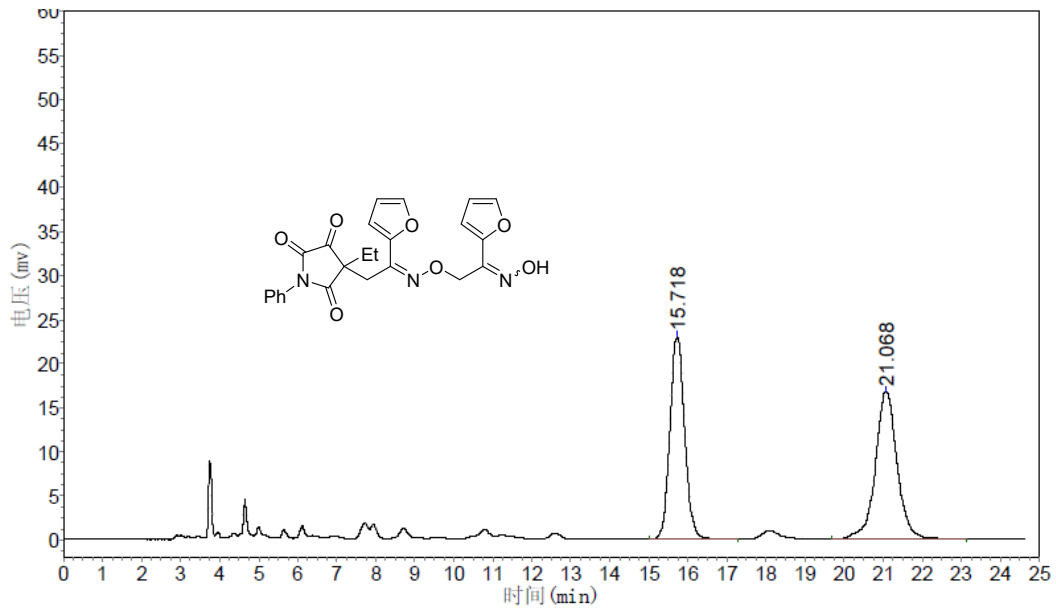

| Peak# | Ret. Time (min) | Height (mV*sec) | Area (mv)  | Area (%) |
|-------|-----------------|-----------------|------------|----------|
| 1     | 15.718          | 22908.596       | 593093.500 | 49.2011  |
| 2     | 21.068          | 16486.066       | 612353.688 | 50.7989  |

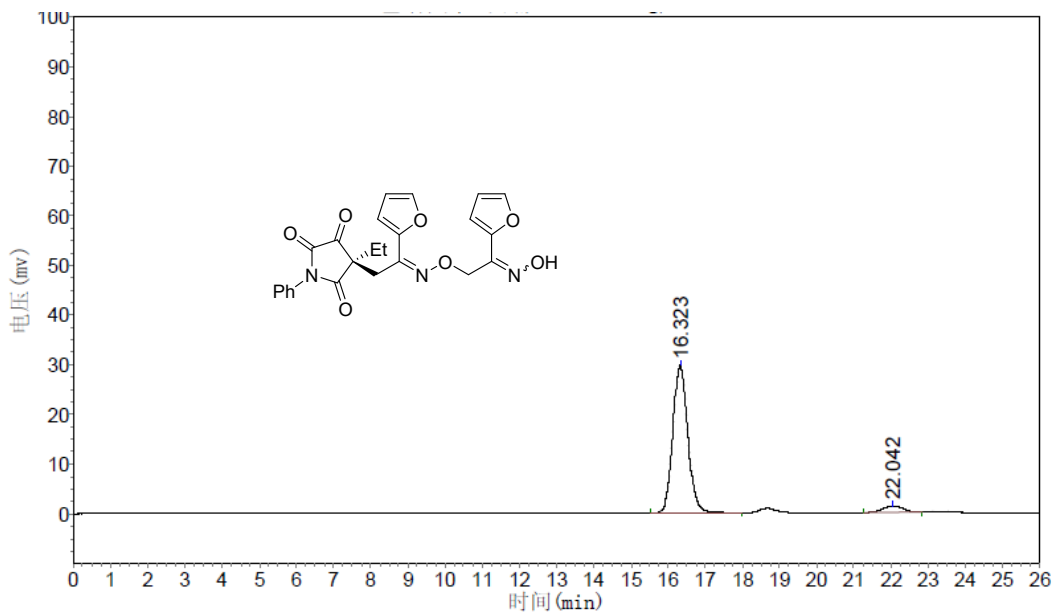

| Peak# | Ret. Time (min) | Height (mV*sec) | Area (mv)  | Area (%) |
|-------|-----------------|-----------------|------------|----------|
| 1     | 16.323          | 29690.545       | 834943.250 | 94.6072  |
| 2     | 22.042          | 1285.830        | 47593.207  | 5.3928   |

Chiralpak AD-H, n-hexane/isopropanol = 80/20, flow rate 1.0 mL/min,  $\lambda = 254$  nm,  $t_{\text{major}} = 16$  min,  $t_{\text{minor}} = 22$  min

3an

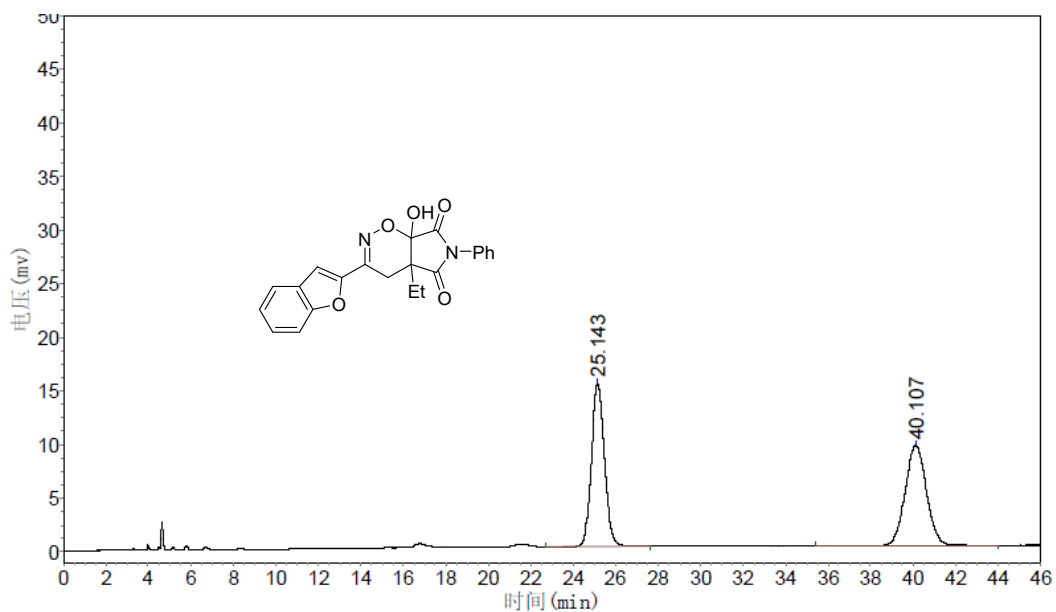

| Peak# | Ret. Time (min) | Height (mV*sec) | Area (mv)  | Area (%) |
|-------|-----------------|-----------------|------------|----------|
| 1     | 25.143          | 15193.055       | 646266.688 | 49.9665  |
| 2     | 40.107          | 9298.064        | 647132.313 | 50.0335  |

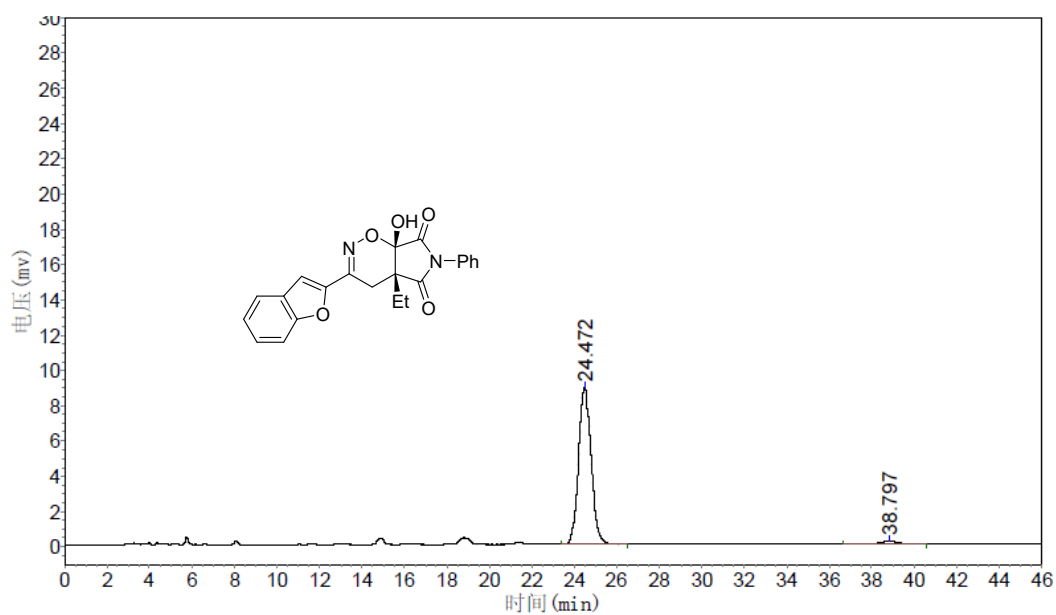

| Peak# | Ret. Time (min) | Height (mV*sec) | Area (mv)  | Area (%) |
|-------|-----------------|-----------------|------------|----------|
| 1     | 24.472          | 8858.015        | 367551.094 | 96.9037  |
| 2     | 38.797          | 173.653         | 11744.149  | 3.0963   |

Chiralpak AD-H, n-hexane/isopropanol = 80/20, flow rate 1.0 mL/min,  $\lambda = 254$  nm,  $t_{\text{major}} = 24$  min,  $t_{\text{minor}} = 38$  min

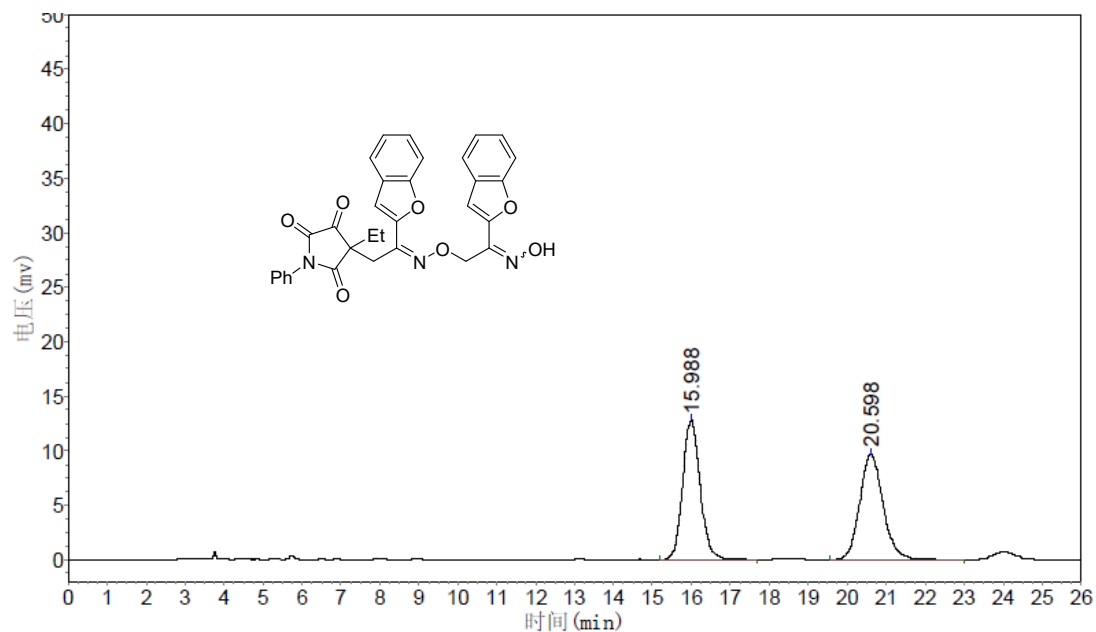

| Peak# | Ret. Time (min) | Height (mV*sec) | Area (mv)  | Area (%) |
|-------|-----------------|-----------------|------------|----------|
| 1     | 15.988          | 12740.798       | 395449.313 | 49.8862  |
| 2     | 20.598          | 9663.707        | 397253.438 | 50.1138  |

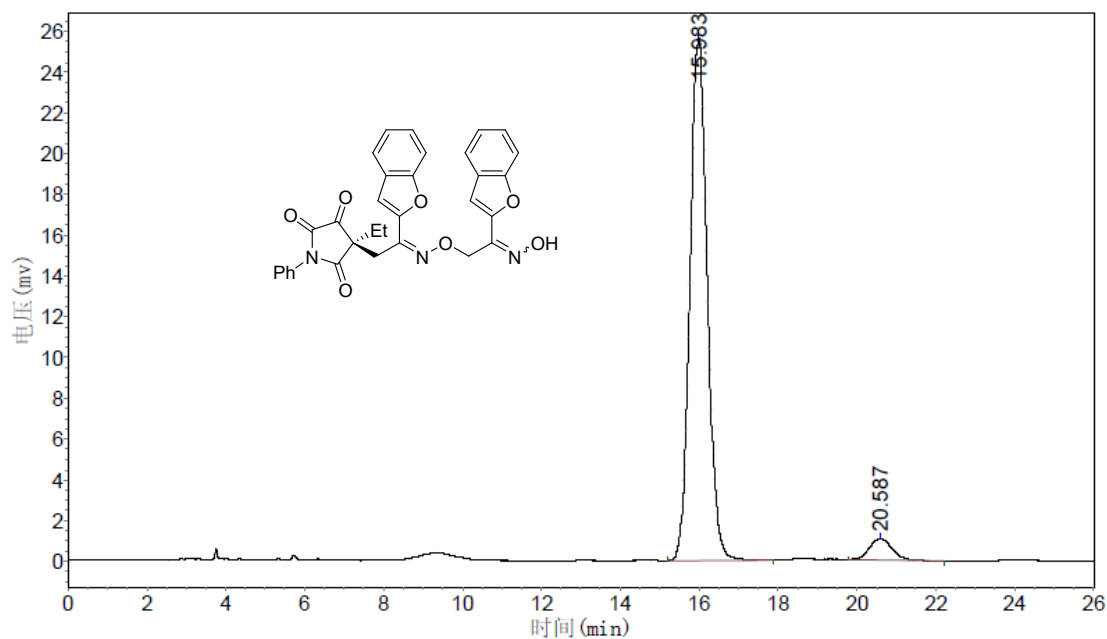

| Peak# | Ret. Time (min) | Height (mV*sec) | Area (mv)  | Area (%) |
|-------|-----------------|-----------------|------------|----------|
| 1     | 15.983          | 25609.830       | 778847.938 | 95.3503  |
| 2     | 20.587          | 1018.711        | 37980.340  | 4.6497   |

Chiralpak AD-H, n-hexane/isopropanol = 80/20, flow rate 1.0 mL/min,  $\lambda = 254$  nm,  $t_{\text{major}} = 15$  min,  $t_{\text{minor}} = 20$  min

**3an'** (2.2eq)

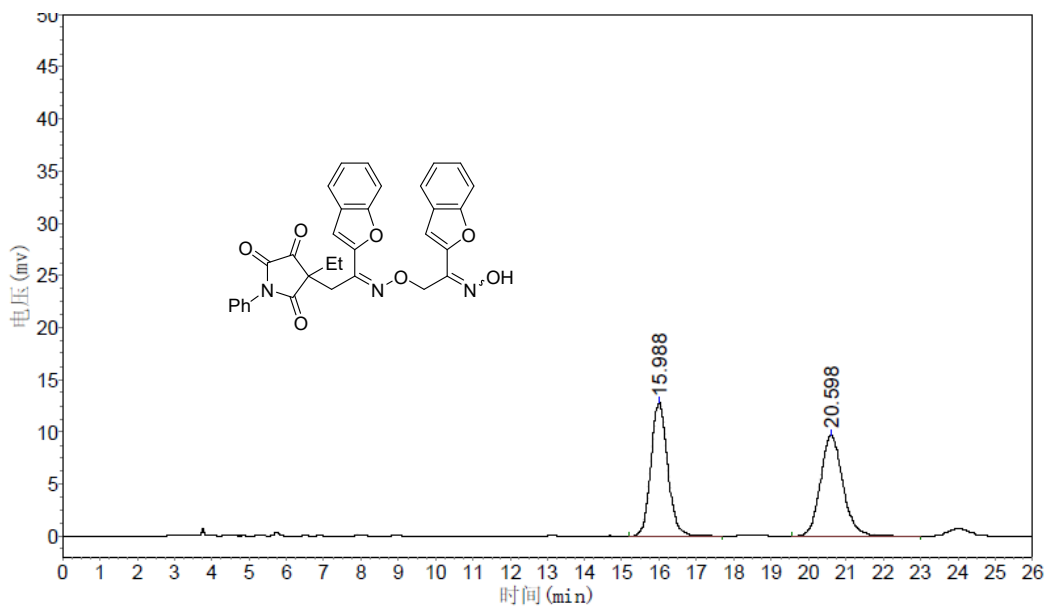

| Peak# | Ret. Time (min) | Height (mV*sec) | Area (mv)  | Area (%) |
|-------|-----------------|-----------------|------------|----------|
| 1     | 15.988          | 12740.798       | 395449.313 | 49.8862  |
| 2     | 20.598          | 9663.707        | 397253.438 | 50.1138  |

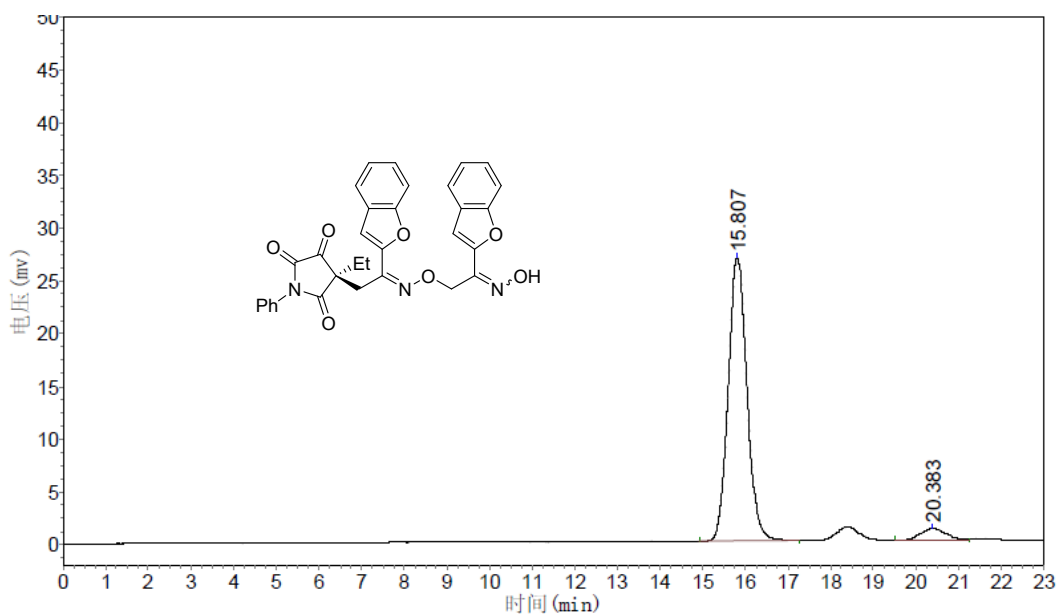

| Peak# | Ret. Time (min) | Height (mV*sec) | Area (mv)  | Area (%) |
|-------|-----------------|-----------------|------------|----------|
| 1     | 15.807          | 26816.297       | 816345.563 | 95.0340  |
| 2     | 20.383          | 1059.722        | 42657.996  | 4.9660   |

Chiralpak AD-H, n-hexane/isopropanol = 80/20, flow rate 1.0 mL/min,  $\lambda = 254$  nm,  $t_{\text{major}} = 15$  min,  $t_{\text{minor}} = 20$  min

3ao

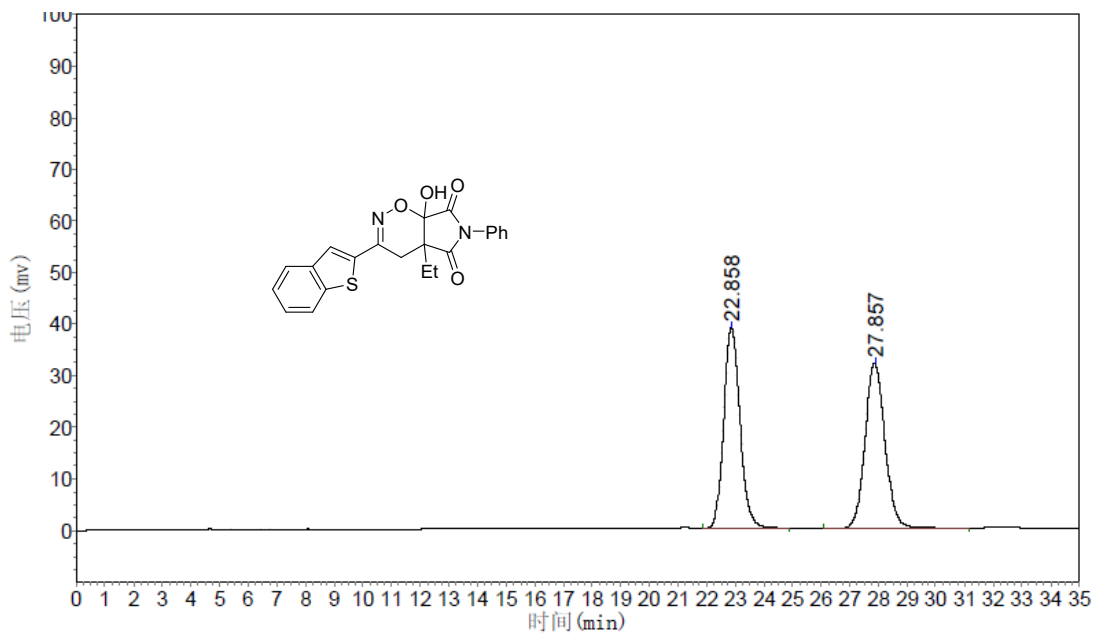

| Peak# | Ret. Time (min) | Height (mV*sec) | Area (mv)   | Area (%) |
|-------|-----------------|-----------------|-------------|----------|
| 1     | 22.858          | 38872.797       | 1528147.625 | 49.9328  |
| 2     | 27.857          | 31845.869       | 1532259.000 | 50.0672  |

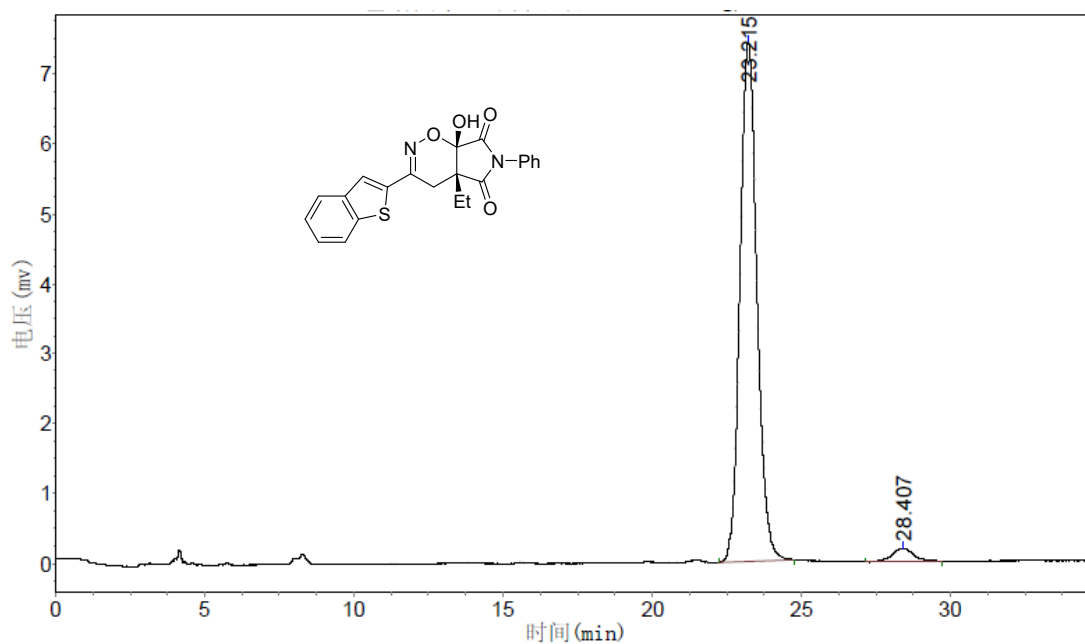

| Peak# | Ret. Time (min) | Height (mV*sec) | Area (mv)  | Area (%) |
|-------|-----------------|-----------------|------------|----------|
| 1     | 23.215          | 7425.785        | 292571.813 | 96.8746  |
| 2     | 28.407          | 193.519         | 9439.000   | 3.1254   |

Chiralpak AD-H, n-hexane/isopropanol = 80/20, flow rate 1.0 mL/min,  $\lambda = 254$  nm,  $t_{\text{major}} = 23$  min,  $t_{\text{minor}} = 28$  min

3ao'

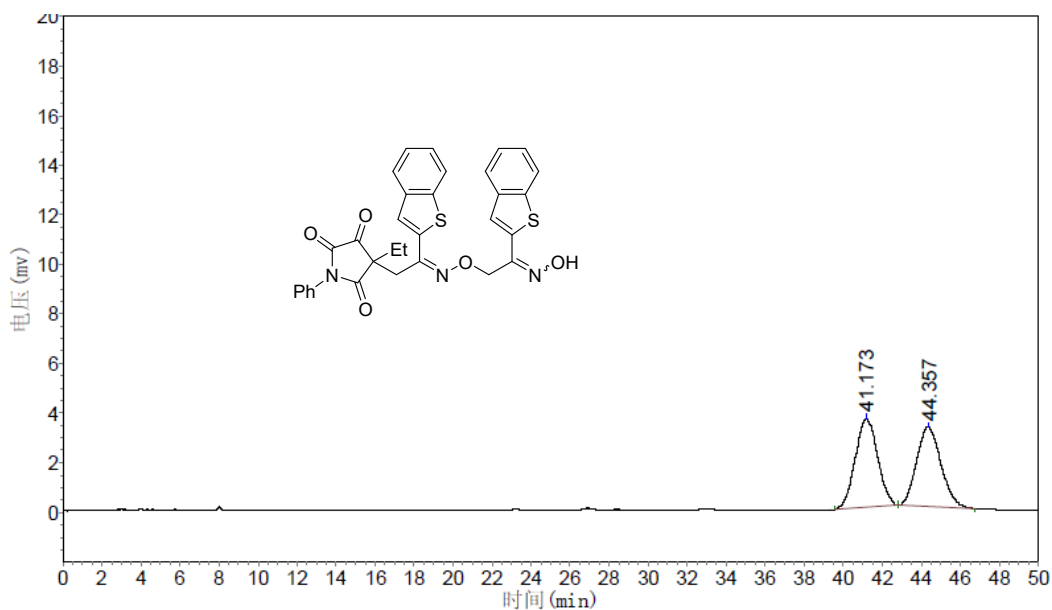

| Peak# | Ret. Time (min) | Height (mV*sec) | Area (mv)  | Area (%) |
|-------|-----------------|-----------------|------------|----------|
| 1     | 41.173          | 3568.592        | 284154.156 | 50.5807  |
| 2     | 44.357          | 3183.152        | 277629.813 | 49.4193  |

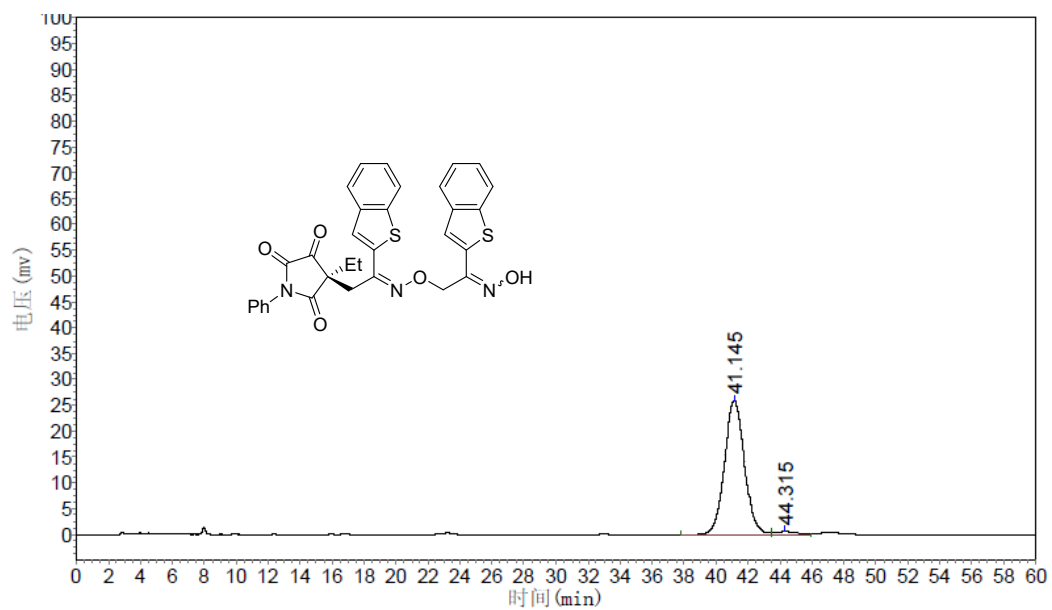

| Peak# | Ret. Time (min) | Height (mV*sec) | Area (mv)   | Area (%) |
|-------|-----------------|-----------------|-------------|----------|
| 1     | 41.145          | 25870.180       | 2228276.000 | 97.7426  |
| 2     | 44.315          | 545.500         | 51463.750   | 2.2574   |

Chiralpak AD-H, n-hexane/isopropanol = 90/10, flow rate 1.0 mL/min,  $\lambda = 254$  nm,  $t_{\text{major}} = 41$  min,  $t_{\text{minor}} = 44$  min

3a0' (2.2 eq)

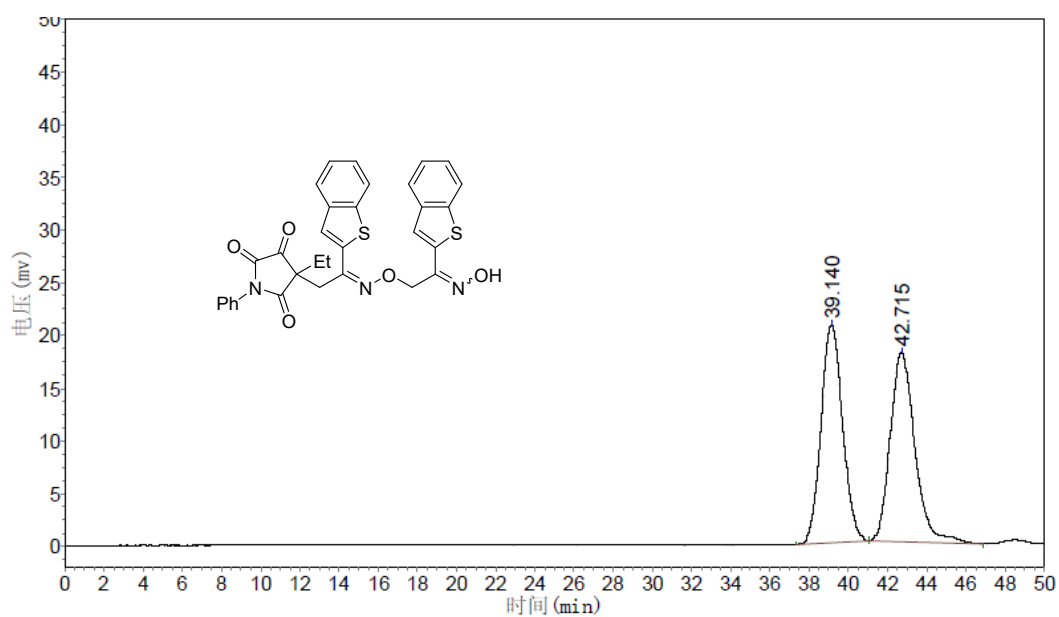

| Peak# | Ret. Time (min) | Height (mV*sec) | Area (mv)   | Area (%) |
|-------|-----------------|-----------------|-------------|----------|
| 1     | 39.140          | 20662.900       | 1575071.375 | 50.2131  |
| 2     | 42.715          | 17914.256       | 1561702.125 | 49.7869  |

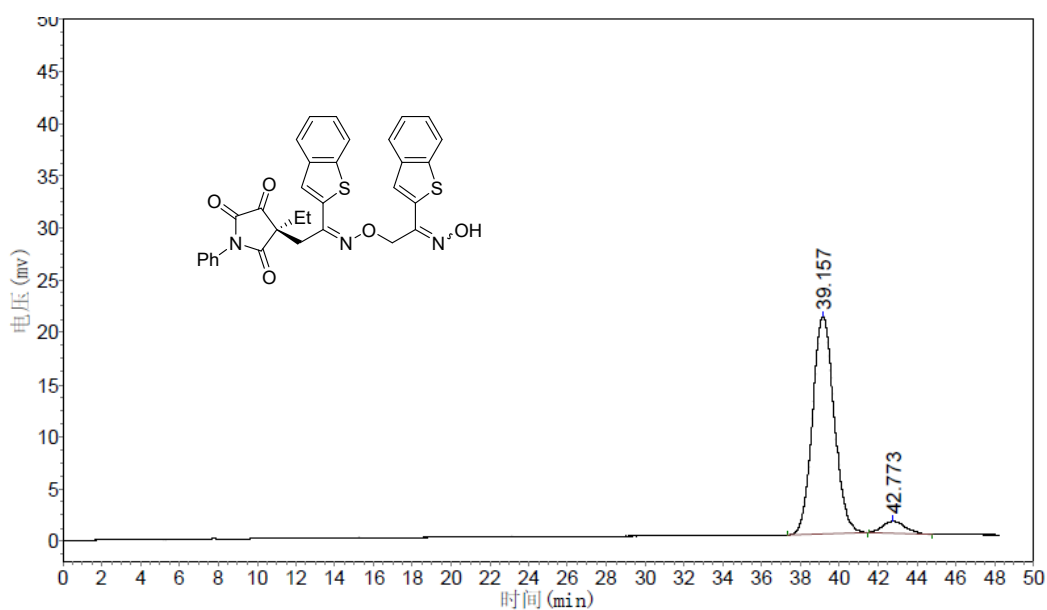

| Peak# | Ret. Time (min) | Height (mV*sec) | Area (mv)   | Area (%) |
|-------|-----------------|-----------------|-------------|----------|
| 1     | 39.157          | 20868.396       | 1615189.750 | 94.8490  |
| 2     | 42.773          | 1136.342        | 87715.914   | 5.1510   |

Chiralpak AD-H, n-hexane/isopropanol = 90/10, flow rate 1.0 mL/min,  $\lambda = 254$  nm,  $t_{\text{major}} = 39$  min,  $t_{\text{minor}} = 42$  min

## 3ap'

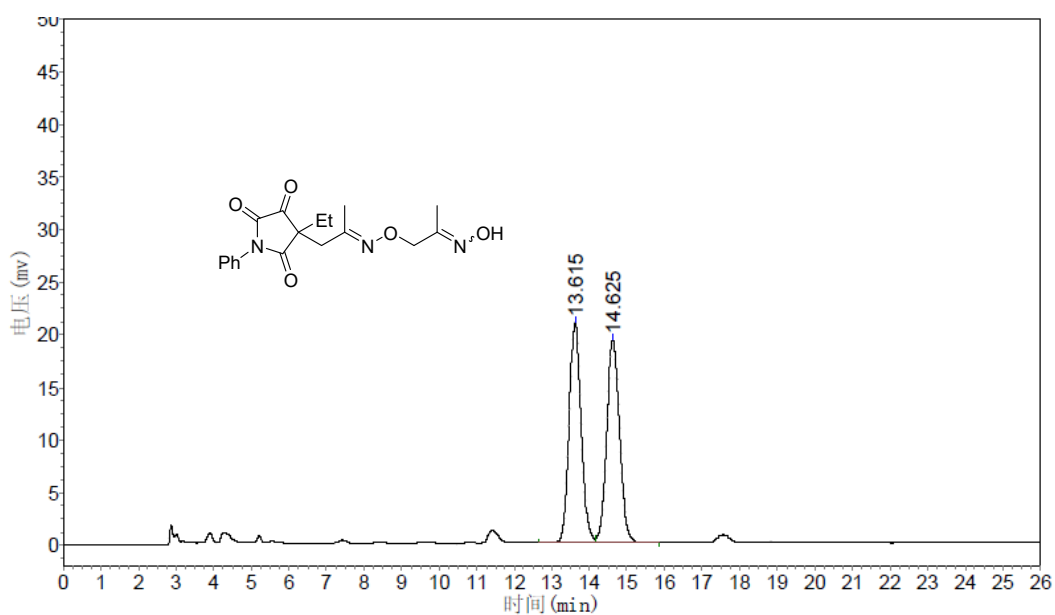

| Peak# | Ret. Time (min) | Height (mV*sec) | Area (mv)  | Area (%) |
|-------|-----------------|-----------------|------------|----------|
| 1     | 13.615          | 20931.334       | 469013.219 | 50.3902  |
| 2     | 14.625          | 19290.162       | 461748.750 | 49.6098  |

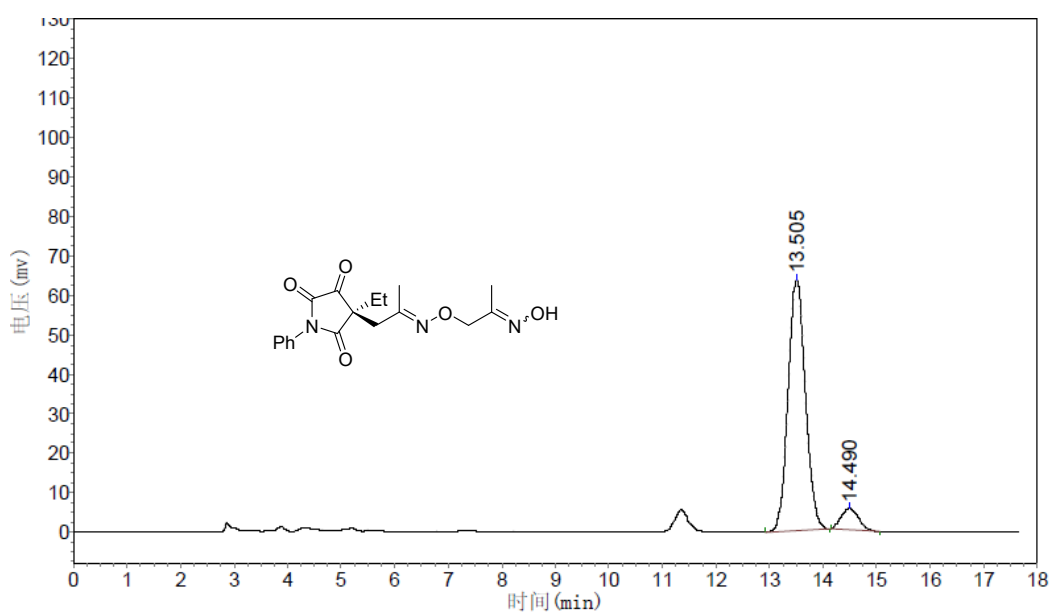

| Peak# | Ret. Time (min) | Height (mV*sec) | Area (mv)   | Area (%) |
|-------|-----------------|-----------------|-------------|----------|
| 1     | 13.505          | 63459.309       | 1428135.000 | 92.0713  |
| 2     | 14.490          | 5396.768        | 122983.711  | 7.9287   |

Chiralpak AD-H, n-hexane/isopropanol = 80/20, flow rate 1.0 mL/min,  $\lambda = 254$  nm,  $t_{\text{major}} = 13$  min,  $t_{\text{minor}} = 14$  min



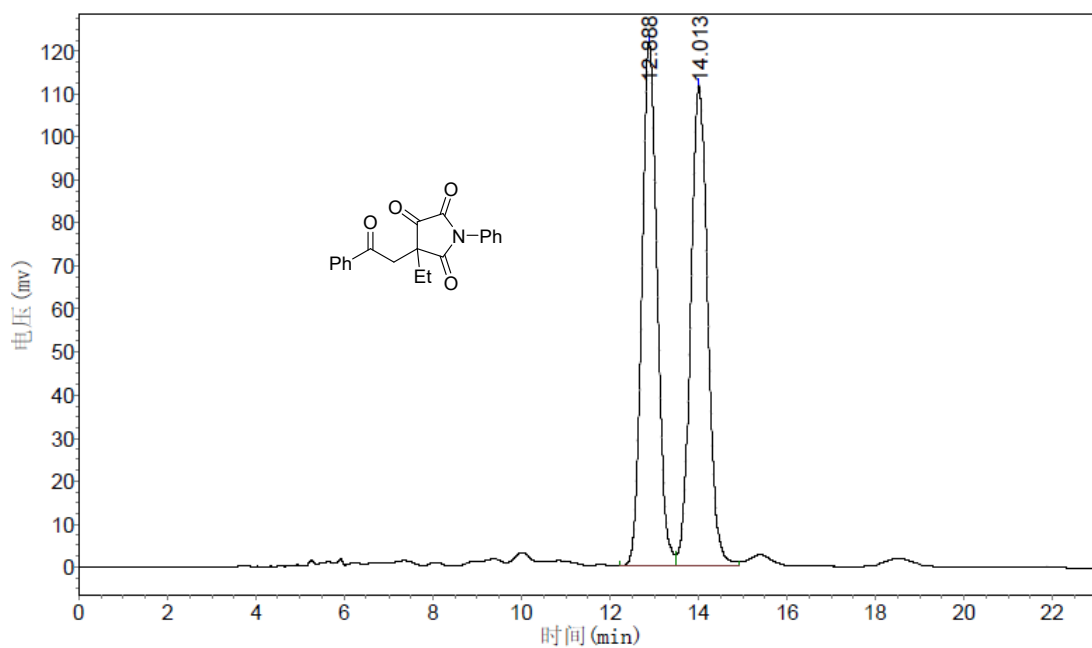

| Peak# | Ret. Time (min) | Height (mV*sec) | Area (mv)   | Area (%) |
|-------|-----------------|-----------------|-------------|----------|
| 1     | 12.888          | 121920.891      | 2934003.750 | 49.5593  |
| 2     | 14.013          | 111816.977      | 2986185.000 | 50.4407  |

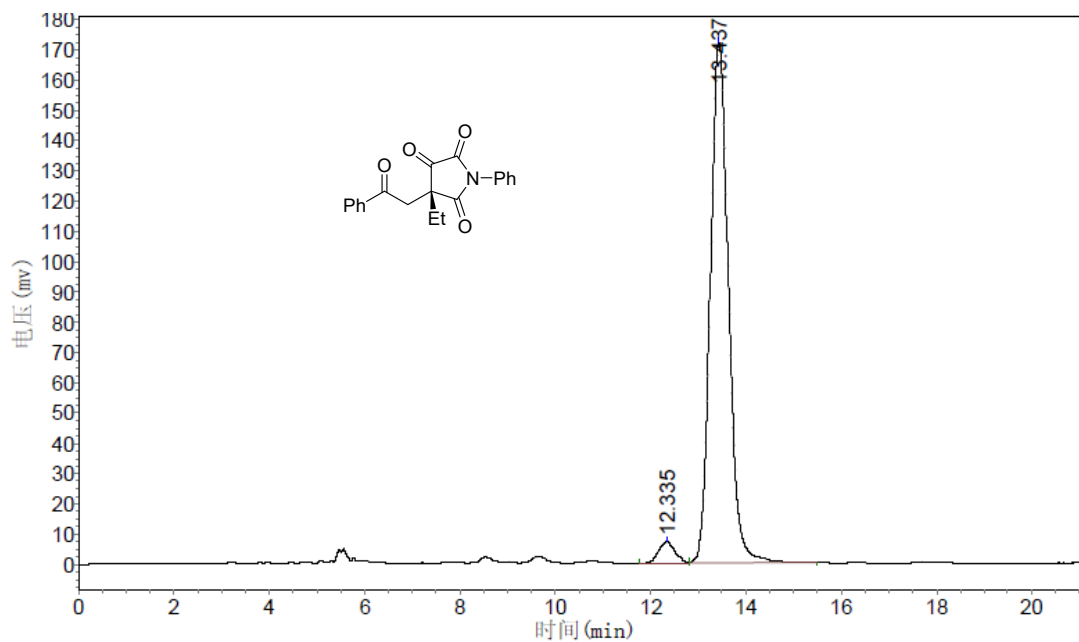

| Peak# | Ret. Time (min) | Height (mV*sec) | Area (mv)   | Area (%) |
|-------|-----------------|-----------------|-------------|----------|
| 1     | 12.335          | 6860.317        | 162957.672  | 3.4655   |
| 2     | 13.437          | 171715.078      | 4539268.500 | 96.5345  |

Chiralpak AD-H, n-hexane/isopropanol = 80/20, flow rate 1.0 mL/min,  $\lambda = 254$  nm,  $t_{\text{major}} = 12$  min,  $t_{\text{minor}} = 14$  min

3aa Scale up

105 / 127

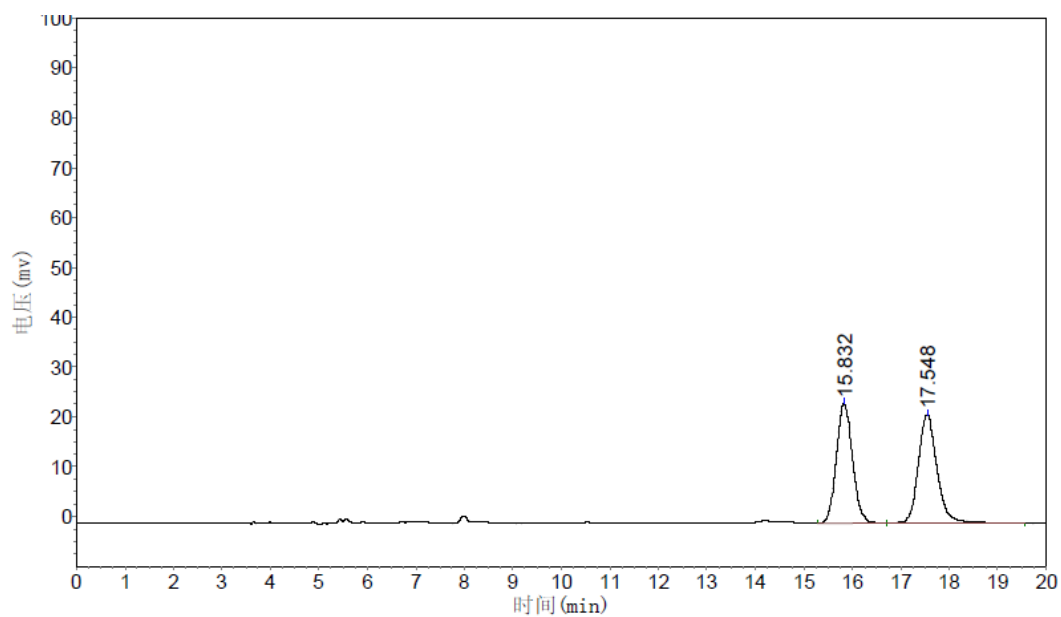

| Peak# | Ret. Time (min) | Height (mV*sec) | Area (mv)  | Area (%) |
|-------|-----------------|-----------------|------------|----------|
| 1     | 15.827          | 24015.346       | 553793.438 | 49.1216  |
| 2     | 17.540          | 21669.410       | 573600.313 | 50.8784  |

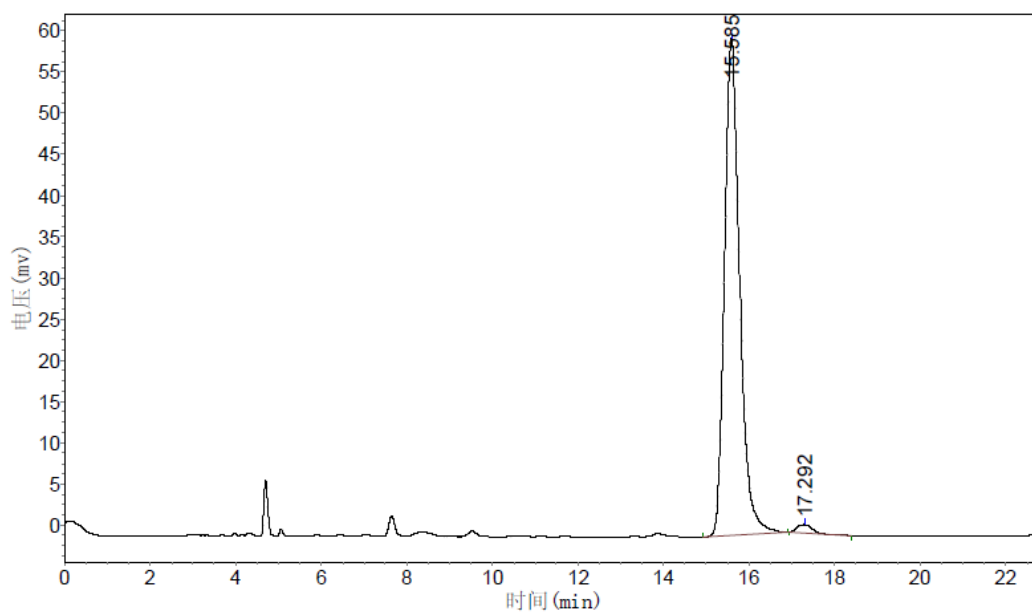

| Peak# | Ret. Time (min) | Height (mV*sec) | Area (mv)   | Area (%) |
|-------|-----------------|-----------------|-------------|----------|
| 1     | 15.585          | 60205.543       | 1484715.250 | 98.3510  |
| 2     | 17.292          | 1065.370        | 24894.047   | 1.6490   |

Chiralpak AD-H, n-hexane/isopropanol = 80/20, flow rate 1.0 mL/min,  $\lambda = 254$  nm,  $t_{\text{major}} = 12$  min,  $t_{\text{minor}} = 14$  min

### 3ama

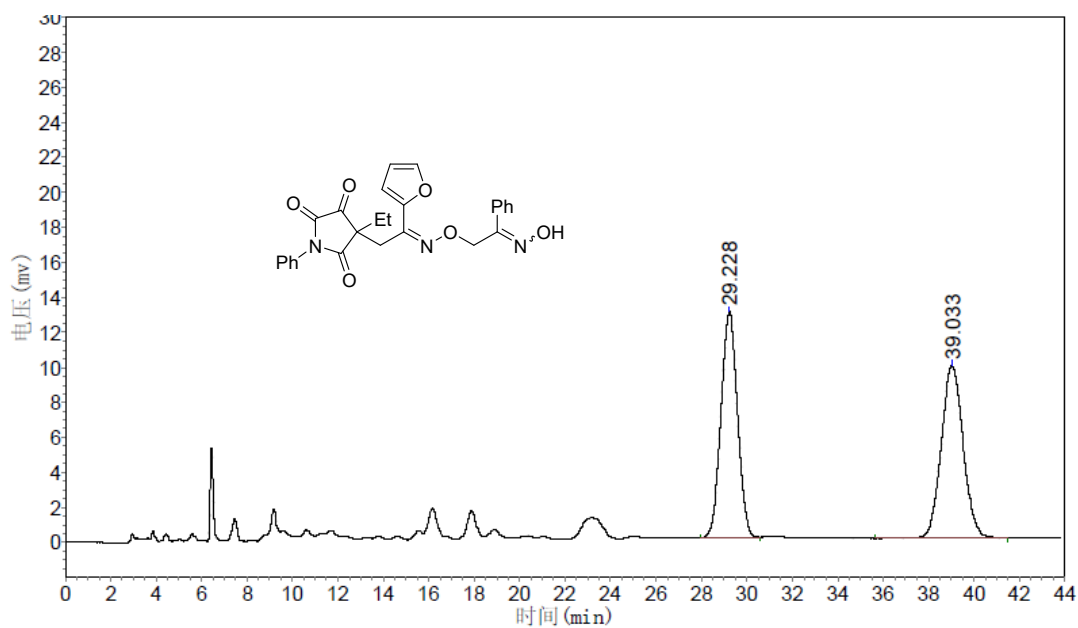

| Peak# | Ret. Time (min) | Height (mV*sec) | Area (mv)  | Area (%) |
|-------|-----------------|-----------------|------------|----------|
| 1     | 29.228          | 12901.671       | 658688.875 | 49.7667  |
| 2     | 39.033          | 9864.483        | 664864.000 | 50.2333  |

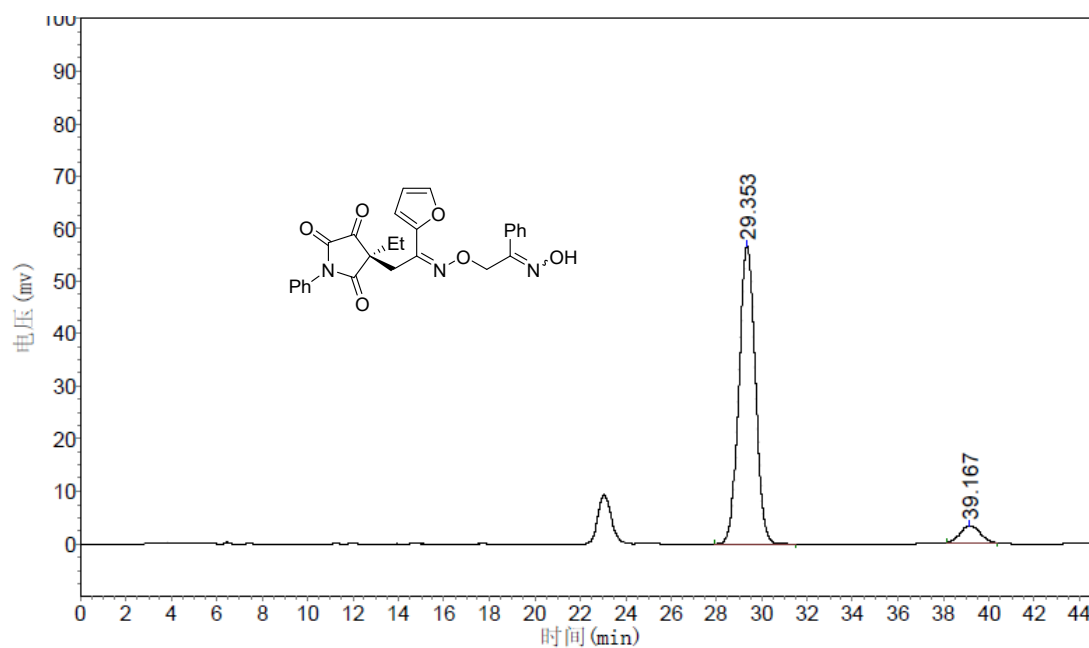

| Peak# | Ret. Time (min) | Height (mV*sec) | Area (mv)   | Area (%) |
|-------|-----------------|-----------------|-------------|----------|
| 1     | 29.353          | 56601.680       | 2835231.250 | 93.4743  |
| 2     | 39.167          | 3187.604        | 197934.781  | 6.5257   |

Chiralpak AD-H, n-hexane/isopropanol = 80/20, flow rate 1.0 mL/min,  $\lambda = 254$  nm,  $t_{\text{major}} = 29$  min,  $t_{\text{minor}} = 39$  min.

HRMS

### 3aa

Cpd. 1: C<sub>20</sub>H<sub>18</sub>N<sub>2</sub>O<sub>4</sub>

Compound Spectra

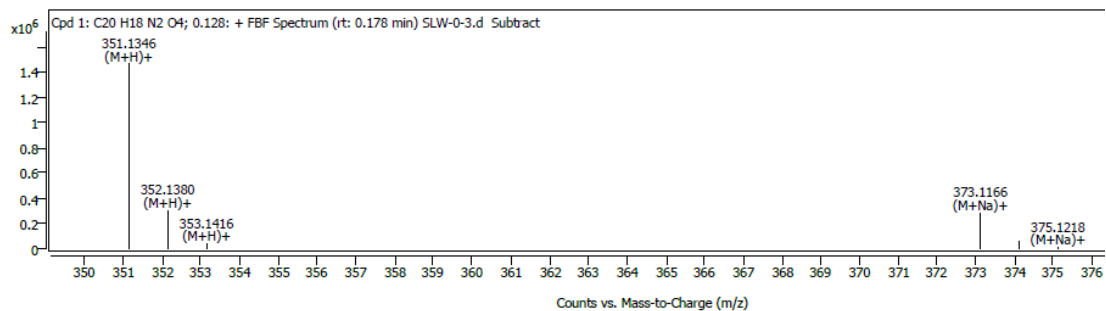

Spectrum Peaks

| m/z      | m/z (Calc) | Diff (ppm) | Abund   | Height % | Height % (Calc) | Ion Species         | Z |
|----------|------------|------------|---------|----------|-----------------|---------------------|---|
| 351.1346 | 351.1339   | 1.94       | 1466728 | 100.00   | 100.00          | (M+H) <sup>+</sup>  | 1 |
| 352.1380 | 352.1371   | 2.57       | 305606  | 20.84    | 22.73           | (M+H) <sup>+</sup>  | 1 |
| 353.1416 | 353.1398   | 5.21       | 39123   | 2.67     | 3.29            | (M+H) <sup>+</sup>  | 1 |
| 373.1166 | 373.1159   | 2.05       | 286719  | 100.00   | 100.00          | (M+Na) <sup>+</sup> | 1 |
| 374.1195 | 374.1191   | 1.24       | 63905   | 22.29    | 22.72           | (M+Na) <sup>+</sup> | 1 |
| 375.1218 | 375.1217   | 0.25       | 11113   | 3.88     | 3.28            | (M+Na) <sup>+</sup> | 1 |

### 3ba

Cpd. 1: C<sub>20</sub>H<sub>17</sub>F N<sub>2</sub>O<sub>4</sub>

Compound Spectra

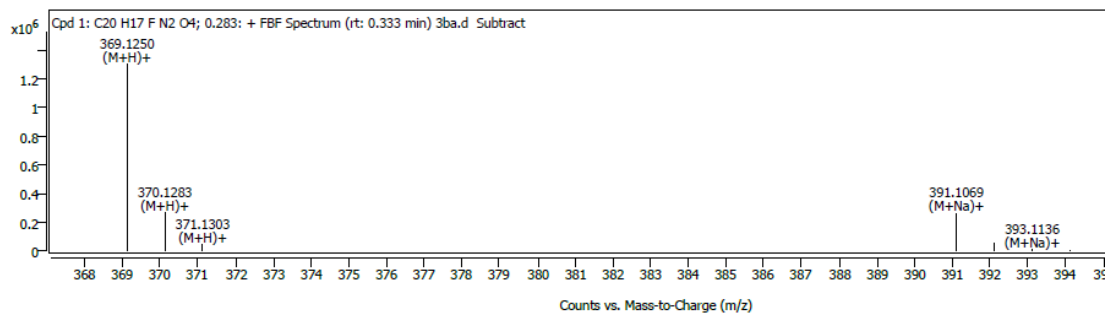

Spectrum Peaks

| m/z      | m/z (Calc) | Diff (ppm) | Abund   | Height % | Height % (Calc) | Ion Species         | Z |
|----------|------------|------------|---------|----------|-----------------|---------------------|---|
| 369.1250 | 369.1245   | 1.34       | 1305243 | 100.00   | 100.00          | (M+H) <sup>+</sup>  | 1 |
| 370.1283 | 370.1277   | 1.66       | 265474  | 20.34    | 22.72           | (M+H) <sup>+</sup>  | 1 |
| 371.1303 | 371.1303   | -0.06      | 41421   | 3.17     | 3.28            | (M+H) <sup>+</sup>  | 1 |
| 391.1069 | 391.1065   | 1.17       | 260796  | 100.00   | 100.00          | (M+Na) <sup>+</sup> | 1 |
| 392.1102 | 392.1096   | 1.47       | 56995   | 21.85    | 22.71           | (M+Na) <sup>+</sup> | 1 |
| 393.1136 | 393.1123   | 3.28       | 8237    | 3.16     | 3.28            | (M+Na) <sup>+</sup> | 1 |
| 394.1141 | 394.1149   | -1.99      | 601     | 0.23     | 0.36            | (M+Na) <sup>+</sup> | 1 |

### 3ca

#### Cpd. 3: C22 H22 N2 O4

##### Compound Spectra

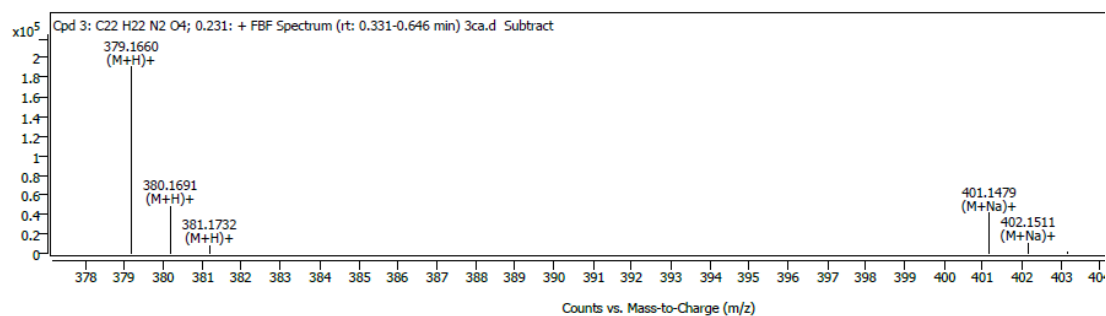

##### Spectrum Peaks

| m/z      | m/z (Calc) | Diff (ppm) | Abund  | Height % | Height % (Calc) | Ion Species | Z |
|----------|------------|------------|--------|----------|-----------------|-------------|---|
| 379.1660 | 379.1652   | 1.93       | 190943 | 100.00   | 100.00          | (M+H)+      | 1 |
| 380.1691 | 380.1684   | 1.81       | 48435  | 25.37    | 24.94           | (M+H)+      | 1 |
| 381.1732 | 381.1712   | 5.41       | 8204   | 4.30     | 3.80            | (M+H)+      | 1 |
| 401.1479 | 401.1472   | 1.91       | 41242  | 100.00   | 100.00          | (M+Na)+     | 1 |
| 402.1511 | 402.1504   | 1.80       | 10534  | 25.54    | 24.93           | (M+Na)+     | 1 |
| 403.1595 | 403.1531   | 15.81      | 1987   | 4.82     | 3.80            | (M+Na)+     | 1 |

### 3da

#### Cpd. 4: C21 H20 N2 O4

##### Compound Spectra

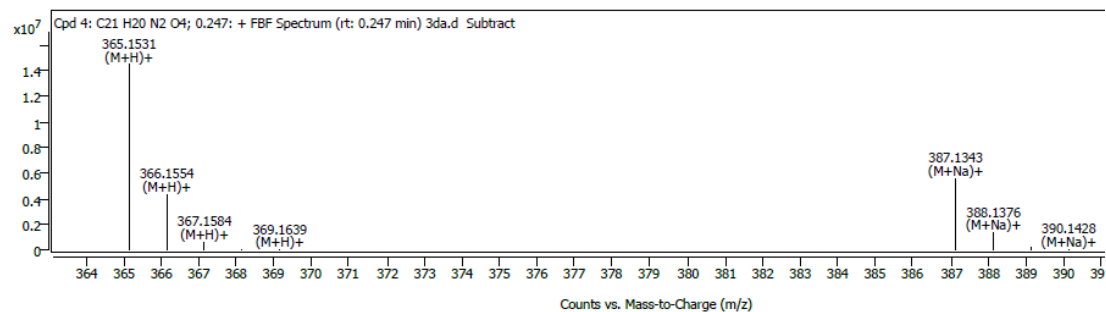

##### Spectrum Peaks

| m/z      | m/z (Calc) | Diff (ppm) | Abund    | Height % | Height % (Calc) | Ion Species | Z |
|----------|------------|------------|----------|----------|-----------------|-------------|---|
| 365.1531 | 365.1496   | 9.49       | 14485329 | 100.00   | 100.00          | (M+H)+      | 1 |
| 366.1554 | 366.1528   | 7.17       | 4337080  | 29.94    | 23.84           | (M+H)+      | 1 |
| 367.1584 | 367.1555   | 7.90       | 642679   | 4.44     | 3.54            | (M+H)+      | 1 |
| 368.1615 | 368.1581   | 9.39       | 69734    | 0.48     | 0.39            | (M+H)+      | 1 |
| 369.1639 | 369.1607   | 8.85       | 8334     | 0.06     | 0.03            | (M+H)+      | 1 |
| 387.1343 | 387.1315   | 7.25       | 5592626  | 100.00   | 100.00          | (M+Na)+     | 1 |
| 388.1376 | 388.1347   | 7.29       | 1339836  | 23.96    | 23.83           | (M+Na)+     | 1 |
| 389.1405 | 389.1374   | 7.99       | 187830   | 3.36     | 3.54            | (M+Na)+     | 1 |
| 390.1428 | 390.1400   | 7.05       | 23067    | 0.41     | 0.39            | (M+Na)+     | 1 |

### 3ea

Cpd. 1: C20 H17 Cl N2 O4

Compound Spectra

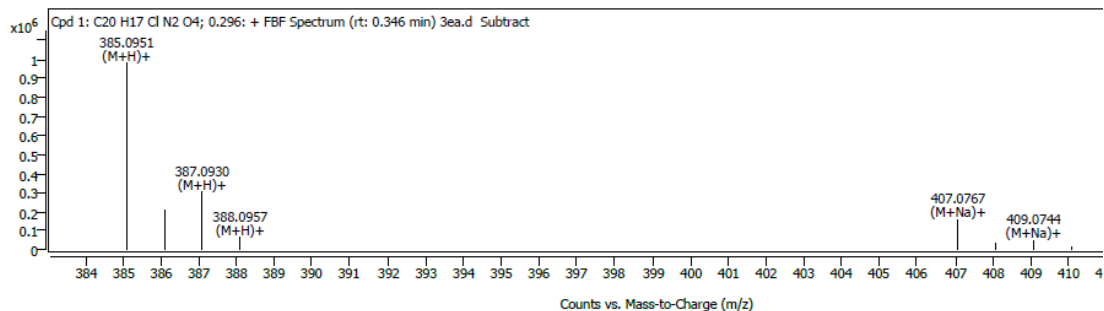

Spectrum Peaks

| m/z      | m/z (Calc) | Diff (ppm) | Abund  | Height % | Height % (Calc) | Ion Species | Z |
|----------|------------|------------|--------|----------|-----------------|-------------|---|
| 385.0951 | 385.0950   | 0.36       | 980203 | 100.00   | 100.00          | (M+H)+      | 1 |
| 386.0982 | 386.0981   | 0.02       | 210063 | 21.43    | 22.72           | (M+H)+      | 1 |
| 387.0930 | 387.0928   | 0.35       | 302280 | 30.84    | 35.28           | (M+H)+      | 1 |
| 388.0957 | 388.0956   | 0.41       | 63714  | 6.50     | 7.63            | (M+H)+      | 1 |
| 407.0767 | 407.0769   | -0.57      | 159523 | 100.00   | 100.00          | (M+Na)+     | 1 |
| 408.0802 | 408.0801   | 0.32       | 35306  | 22.13    | 22.71           | (M+Na)+     | 1 |
| 409.0744 | 409.0748   | -0.85      | 48942  | 30.68    | 35.28           | (M+Na)+     | 1 |
| 410.0768 | 410.0775   | -1.76      | 12693  | 7.96     | 7.62            | (M+Na)+     | 1 |

### 3fa

Cpd. 1: C22 H22 N2 O4

Compound Spectra

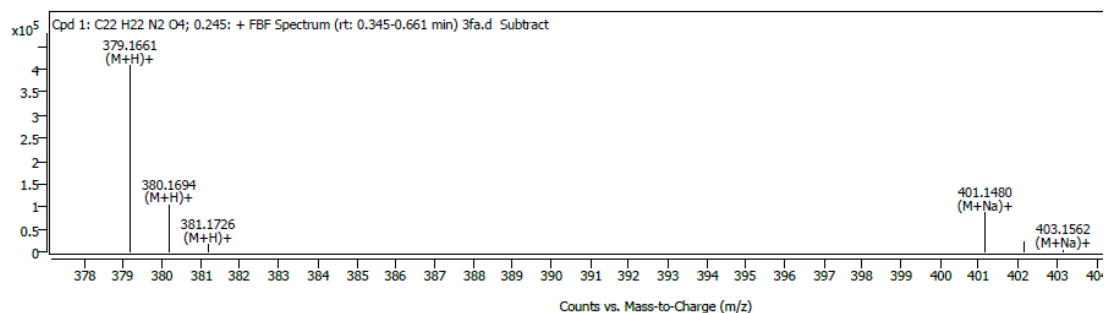

Spectrum Peaks

| m/z      | m/z (Calc) | Diff (ppm) | Abund  | Height % | Height % (Calc) | Ion Species | Z |
|----------|------------|------------|--------|----------|-----------------|-------------|---|
| 379.1661 | 379.1652   | 2.41       | 407673 | 100.00   | 100.00          | (M+H)+      | 1 |
| 380.1694 | 380.1684   | 2.43       | 102397 | 25.12    | 24.94           | (M+H)+      | 1 |
| 381.1726 | 381.1712   | 3.68       | 16032  | 3.93     | 3.80            | (M+H)+      | 1 |
| 401.1480 | 401.1472   | 2.12       | 85297  | 100.00   | 100.00          | (M+Na)+     | 1 |
| 402.1512 | 402.1504   | 1.96       | 21956  | 25.74    | 24.93           | (M+Na)+     | 1 |
| 403.1562 | 403.1531   | 7.61       | 3702   | 4.34     | 3.80            | (M+Na)+     | 1 |

### 3ga

Cpd. 2: C<sub>20</sub>H<sub>16</sub>F<sub>2</sub>N<sub>2</sub>O<sub>4</sub>

Compound Spectra

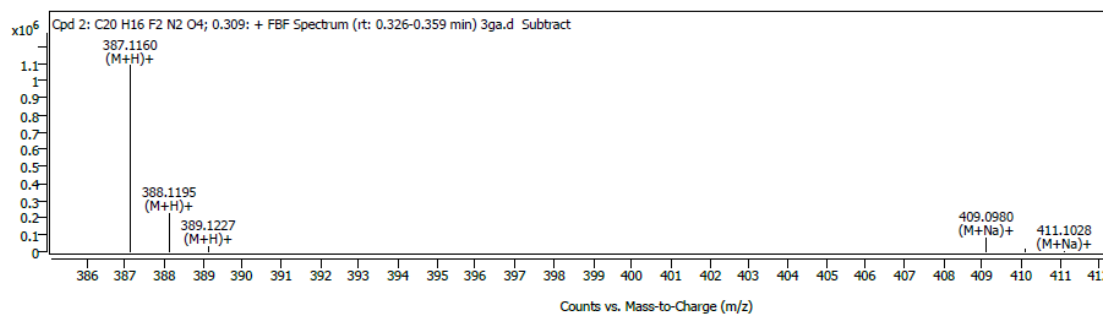

Spectrum Peaks

| m/z      | m/z (Calc) | Diff (ppm) | Abund   | Height % | Height % (Calc) | Ion Species | Z |
|----------|------------|------------|---------|----------|-----------------|-------------|---|
| 387.1160 | 387.1151   | 2.36       | 1089990 | 100.00   | 100.00          | (M+H)+      | 1 |
| 388.1195 | 388.1183   | 3.13       | 226278  | 20.76    | 22.71           | (M+H)+      | 1 |
| 389.1227 | 389.1209   | 4.61       | 31078   | 2.85     | 3.28            | (M+H)+      | 1 |
| 409.0980 | 409.0970   | 2.46       | 82372   | 100.00   | 100.00          | (M+Na)+     | 1 |
| 410.1012 | 410.1002   | 2.42       | 17717   | 21.51    | 22.70           | (M+Na)+     | 1 |
| 411.1028 | 411.1029   | -0.17      | 3467    | 4.21     | 3.28            | (M+Na)+     | 1 |

### 3ha

Cpd. 4: C<sub>21</sub>H<sub>20</sub>N<sub>2</sub>O<sub>4</sub>

Compound Spectra

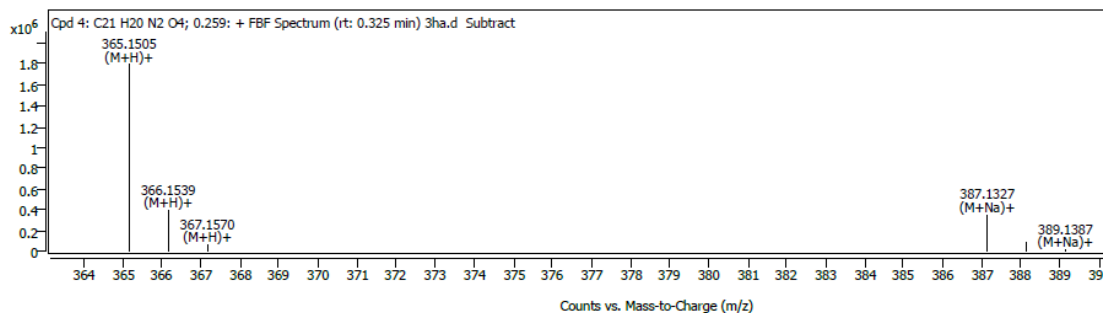

Spectrum Peaks

| m/z      | m/z (Calc) | Diff (ppm) | Abund   | Height % | Height % (Calc) | Ion Species | Z |
|----------|------------|------------|---------|----------|-----------------|-------------|---|
| 365.1505 | 365.1496   | 2.54       | 1799427 | 100.00   | 100.00          | (M+H)+      | 1 |
| 366.1539 | 366.1528   | 3.08       | 392277  | 21.80    | 23.84           | (M+H)+      | 1 |
| 367.1570 | 367.1555   | 4.17       | 60760   | 3.38     | 3.54            | (M+H)+      | 1 |
| 387.1327 | 387.1315   | 2.96       | 351917  | 100.00   | 100.00          | (M+Na)+     | 1 |
| 388.1359 | 388.1347   | 3.13       | 82926   | 23.56    | 23.83           | (M+Na)+     | 1 |
| 389.1387 | 389.1374   | 3.33       | 14209   | 4.04     | 3.54            | (M+Na)+     | 1 |

### 3ia

Cpd. 3: C21 H20 N2 O5

Compound Spectra

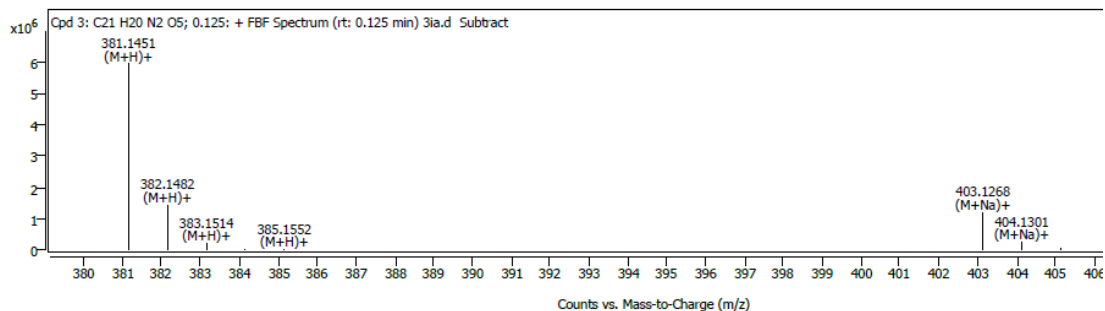

#### Spectrum Peaks

| m/z      | m/z (Calc) | Diff (ppm) | Abund   | Height % | Height % (Calc) | Ion Species | Z |
|----------|------------|------------|---------|----------|-----------------|-------------|---|
| 381.1451 | 381.1445   | 1.62       | 5935420 | 100.00   | 100.00          | (M+H)+      | 1 |
| 382.1482 | 382.1477   | 1.21       | 1434329 | 24.17    | 23.88           | (M+H)+      | 1 |
| 383.1514 | 383.1503   | 2.84       | 200238  | 3.37     | 3.75            | (M+H)+      | 1 |
| 384.1542 | 384.1529   | 3.32       | 25788   | 0.43     | 0.44            | (M+H)+      | 1 |
| 385.1552 | 385.1554   | -0.47      | 3014    | 0.05     | 0.04            | (M+H)+      | 1 |
| 403.1268 | 403.1264   | 0.77       | 1185478 | 100.00   | 100.00          | (M+Na)+     | 1 |
| 404.1301 | 404.1296   | 1.13       | 242022  | 20.42    | 23.86           | (M+Na)+     | 1 |
| 405.1326 | 405.1322   | 1.00       | 43437   | 3.66     | 3.75            | (M+Na)+     | 1 |

### 3ja

Cpd. 1: C20 H17 F N2 O4

Compound Spectra

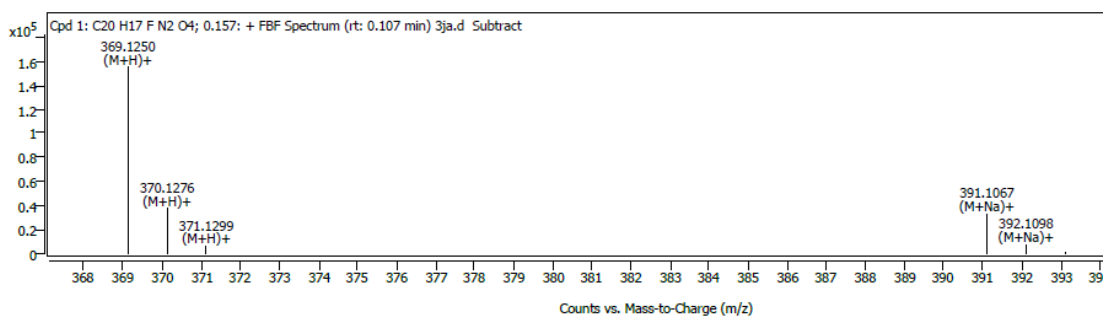

#### Spectrum Peaks

| m/z      | m/z (Calc) | Diff (ppm) | Abund  | Height % | Height % (Calc) | Ion Species | Z |
|----------|------------|------------|--------|----------|-----------------|-------------|---|
| 369.1250 | 369.1245   | 1.25       | 154941 | 100.00   | 100.00          | (M+H)+      | 1 |
| 370.1276 | 370.1277   | -0.18      | 37512  | 24.21    | 22.72           | (M+H)+      | 1 |
| 371.1299 | 371.1303   | -1.21      | 6232   | 4.02     | 3.28            | (M+H)+      | 1 |
| 391.1067 | 391.1065   | 0.53       | 33304  | 100.00   | 100.00          | (M+Na)+     | 1 |
| 392.1098 | 392.1096   | 0.46       | 7890   | 23.69    | 22.71           | (M+Na)+     | 1 |
| 393.1180 | 393.1123   | 14.60      | 1434   | 4.30     | 3.28            | (M+Na)+     | 1 |



### 3ka

Cpd. 3: C20 H17 Cl N2 O4

Compound Spectra

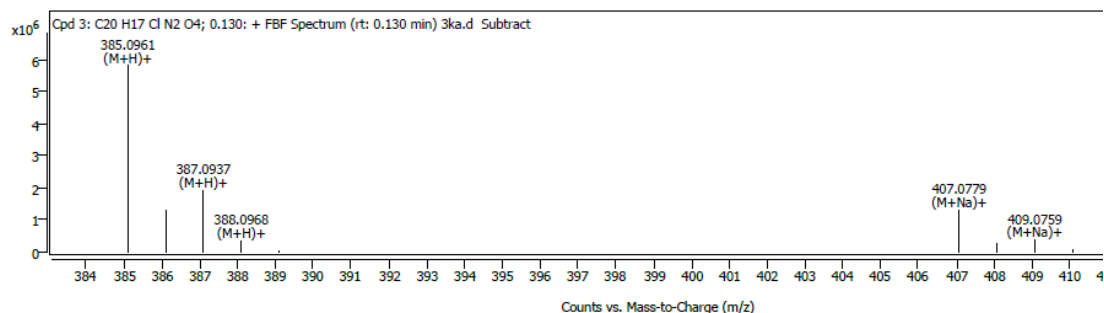

Spectrum Peaks

| m/z      | m/z (Calc) | Diff (ppm) | Abund   | Height % | Height % (Calc) | Ion Species | Z |
|----------|------------|------------|---------|----------|-----------------|-------------|---|
| 385.0961 | 385.0950   | 3.02       | 5812792 | 100.00   | 100.00          | (M+H)+      | 1 |
| 386.0991 | 386.0981   | 2.49       | 1298354 | 22.34    | 22.72           | (M+H)+      | 1 |
| 387.0937 | 387.0928   | 2.18       | 1935741 | 33.30    | 35.28           | (M+H)+      | 1 |
| 388.0968 | 388.0956   | 3.13       | 369646  | 6.36     | 7.63            | (M+H)+      | 1 |
| 389.0997 | 389.0981   | 4.06       | 57948   | 1.00     | 1.08            | (M+H)+      | 1 |
| 407.0779 | 407.0769   | 2.32       | 1310898 | 100.00   | 100.00          | (M+Na)+     | 1 |
| 408.0813 | 408.0801   | 2.91       | 273993  | 20.90    | 22.71           | (M+Na)+     | 1 |
| 409.0759 | 409.0748   | 2.72       | 390126  | 29.76    | 35.28           | (M+Na)+     | 1 |
| 410.0785 | 410.0775   | 2.33       | 86828   | 6.62     | 7.62            | (M+Na)+     | 1 |

### 3la

Cpd. 5: C20 H17 Br N2 O4

Compound Spectra

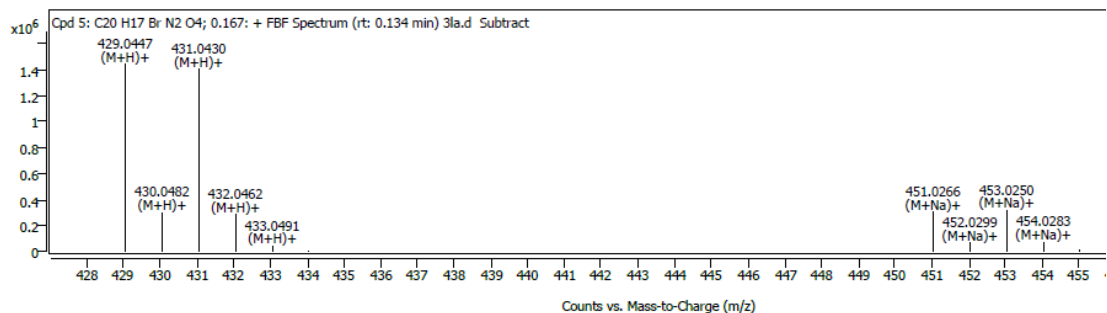

Spectrum Peaks

| m/z      | m/z (Calc) | Diff (ppm) | Abund   | Height % | Height % (Calc) | Ion Species | Z |
|----------|------------|------------|---------|----------|-----------------|-------------|---|
| 429.0447 | 429.0444   | 0.61       | 1438729 | 100.00   | 99.44           | (M+H)+      | 1 |
| 430.0482 | 430.0476   | 1.33       | 296304  | 20.59    | 22.59           | (M+H)+      | 1 |
| 431.0430 | 431.0427   | 0.80       | 1400069 | 97.31    | 100.00          | (M+H)+      | 1 |
| 432.0462 | 432.0457   | 1.09       | 283631  | 19.71    | 22.33           | (M+H)+      | 1 |
| 433.0491 | 433.0483   | 1.79       | 39378   | 2.74     | 3.21            | (M+H)+      | 1 |
| 434.0513 | 434.0509   | 1.08       | 4918    | 0.34     | 0.35            | (M+H)+      | 1 |
| 451.0266 | 451.0264   | 0.55       | 302789  | 96.77    | 99.44           | (M+Na)+     | 1 |
| 452.0299 | 452.0296   | 0.74       | 64832   | 20.72    | 22.58           | (M+Na)+     | 1 |
| 453.0250 | 453.0246   | 0.80       | 312895  | 100.00   | 100.00          | (M+Na)+     | 1 |
| 454.0283 | 454.0276   | 1.43       | 70129   | 22.41    | 22.32           | (M+Na)+     | 1 |
| 455.0296 | 455.0302   | -1.32      | 10739   | 3.43     | 3.21            | (M+Na)+     | 1 |

### 3ma

Cpd. 2: C21 H20 N2 O4

Compound Spectra

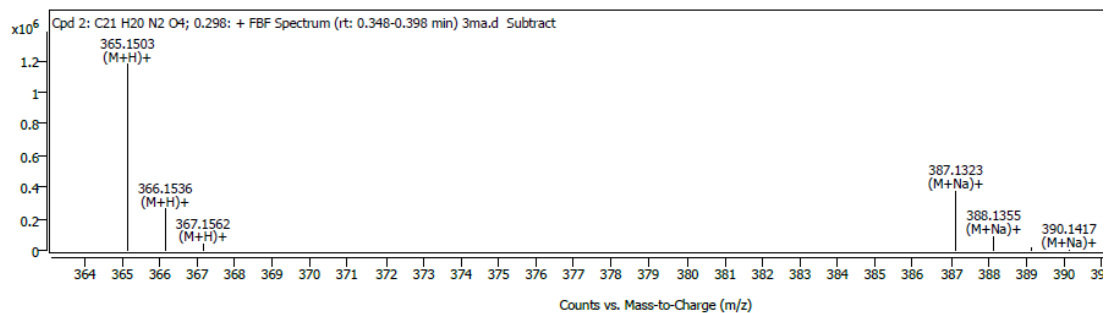

Spectrum Peaks

| m/z      | m/z (Calc) | Diff (ppm) | Abund   | Height % | Height % (Calc) | Ion Species | Z |
|----------|------------|------------|---------|----------|-----------------|-------------|---|
| 365.1503 | 365.1496   | 1.96       | 1174798 | 100.00   | 100.00          | (M+H)+      | 1 |
| 366.1536 | 366.1528   | 2.32       | 262504  | 22.34    | 23.84           | (M+H)+      | 1 |
| 367.1562 | 367.1555   | 2.12       | 40384   | 3.44     | 3.54            | (M+H)+      | 1 |
| 387.1323 | 387.1315   | 2.03       | 373488  | 100.00   | 100.00          | (M+Na)+     | 1 |
| 388.1355 | 388.1347   | 1.87       | 90130   | 24.13    | 23.83           | (M+Na)+     | 1 |
| 389.1385 | 389.1374   | 2.84       | 16459   | 4.41     | 3.54            | (M+Na)+     | 1 |
| 390.1417 | 390.1400   | 4.34       | 2359    | 0.63     | 0.39            | (M+Na)+     | 1 |

### 3na

Cpd. 2: C19 H16 N2 O4

Compound Spectra

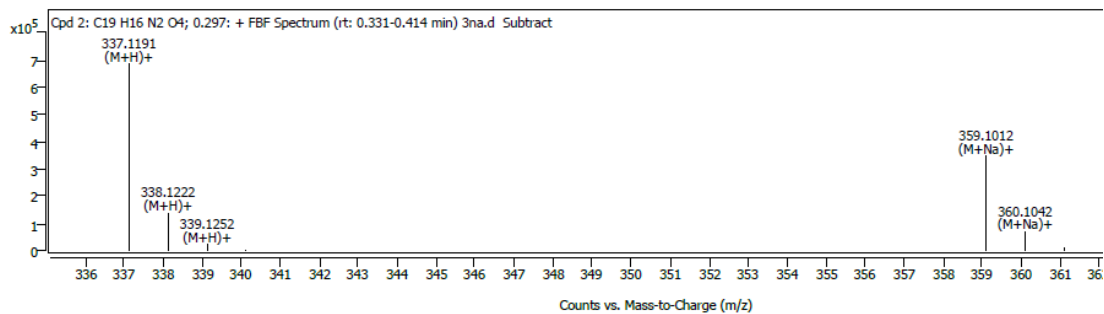

Spectrum Peaks

| m/z      | m/z (Calc) | Diff (ppm) | Abund  | Height % | Height % (Calc) | Ion Species | Z |
|----------|------------|------------|--------|----------|-----------------|-------------|---|
| 337.1191 | 337.1183   | 2.56       | 684575 | 100.00   | 100.00          | (M+H)+      | 1 |
| 338.1222 | 338.1215   | 2.11       | 136554 | 19.95    | 21.63           | (M+H)+      | 1 |
| 339.1252 | 339.1241   | 3.24       | 22046  | 3.22     | 3.05            | (M+H)+      | 1 |
| 340.1256 | 340.1266   | -3.07      | 2751   | 0.40     | 0.32            | (M+H)+      | 1 |
| 359.1012 | 359.1002   | 2.77       | 346486 | 100.00   | 100.00          | (M+Na)+     | 1 |
| 360.1042 | 360.1034   | 2.32       | 67819  | 19.57    | 21.62           | (M+Na)+     | 1 |
| 361.1069 | 361.1060   | 2.37       | 10559  | 3.05     | 3.05            | (M+Na)+     | 1 |

### 30a

Cpd. 4: C21 H20 N2 O4

Compound Spectra

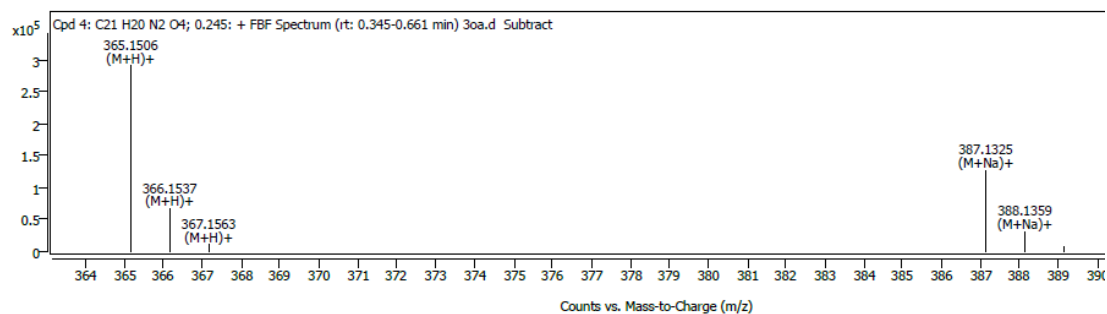

Spectrum Peaks

| m/z      | m/z (Calc) | Diff (ppm) | Abund  | Height % | Height % (Calc) | Ion Species | Z |
|----------|------------|------------|--------|----------|-----------------|-------------|---|
| 365.1506 | 365.1496   | 2.71       | 291235 | 100.00   | 100.00          | (M+H)+      | 1 |
| 366.1537 | 366.1528   | 2.61       | 67169  | 23.06    | 23.84           | (M+H)+      | 1 |
| 367.1563 | 367.1555   | 2.27       | 11191  | 3.84     | 3.54            | (M+H)+      | 1 |
| 387.1325 | 387.1315   | 2.39       | 127311 | 100.00   | 100.00          | (M+Na)+     | 1 |
| 388.1359 | 388.1347   | 2.97       | 31549  | 24.78    | 23.83           | (M+Na)+     | 1 |
| 389.1399 | 389.1374   | 6.34       | 8226   | 6.46     | 3.54            | (M+Na)+     | 1 |

### 3pa

Cpd. 3: C24 H26 N2 O4

Compound Spectra

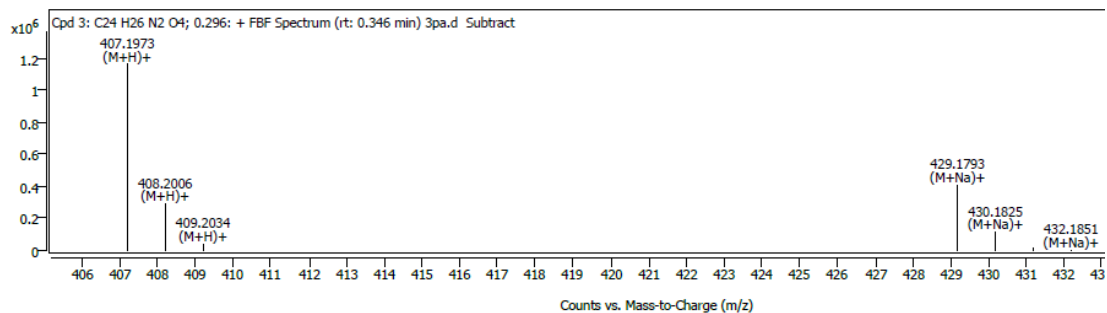

Spectrum Peaks

| m/z      | m/z (Calc) | Diff (ppm) | Abund   | Height % | Height % (Calc) | Ion Species | Z |
|----------|------------|------------|---------|----------|-----------------|-------------|---|
| 407.1973 | 407.1965   | 1.89       | 1160467 | 100.00   | 100.00          | (M+H)+      | 1 |
| 408.2006 | 408.1998   | 1.97       | 291407  | 25.11    | 27.15           | (M+H)+      | 1 |
| 409.2034 | 409.2026   | 2.17       | 43597   | 3.76     | 4.37            | (M+H)+      | 1 |
| 429.1793 | 429.1785   | 1.96       | 408871  | 100.00   | 100.00          | (M+Na)+     | 1 |
| 430.1825 | 430.1817   | 1.83       | 115653  | 28.29    | 27.14           | (M+Na)+     | 1 |
| 431.1845 | 431.1845   | 0.03       | 17387   | 4.25     | 4.36            | (M+Na)+     | 1 |
| 432.1851 | 432.1872   | -4.73      | 2888    | 0.71     | 0.52            | (M+Na)+     | 1 |

### 3qa

Cpd. 4: C<sub>25</sub> H<sub>20</sub> N<sub>2</sub> O<sub>4</sub>

Compound Spectra

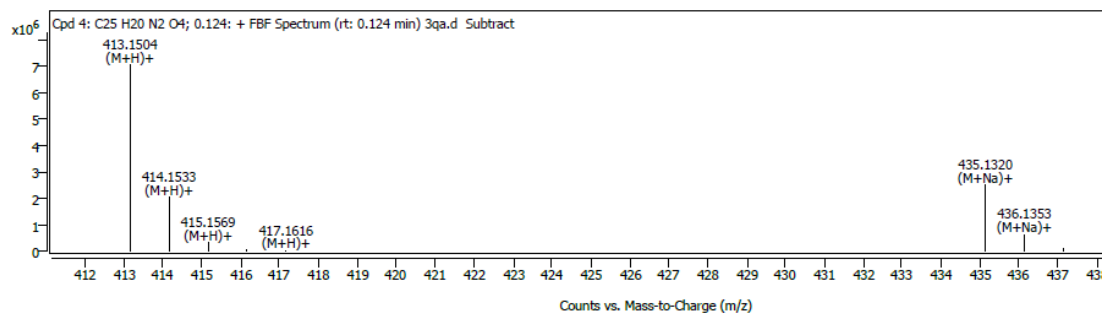

Spectrum Peaks

| m/z      | m/z (Calc) | Diff (ppm) | Abund   | Height % | Height % (Calc) | Ion Species | Z |
|----------|------------|------------|---------|----------|-----------------|-------------|---|
| 413.1504 | 413.1496   | 2.09       | 7019094 | 100.00   | 100.00          | (M+H)+      | 1 |
| 414.1533 | 414.1528   | 1.26       | 2027023 | 28.88    | 28.16           | (M+H)+      | 1 |
| 415.1569 | 415.1556   | 3.10       | 314341  | 4.48     | 4.64            | (M+H)+      | 1 |
| 416.1600 | 416.1583   | 3.97       | 40667   | 0.58     | 0.56            | (M+H)+      | 1 |
| 417.1616 | 417.1610   | 1.51       | 2394    | 0.03     | 0.05            | (M+H)+      | 1 |
| 435.1320 | 435.1315   | 1.02       | 2491953 | 100.00   | 100.00          | (M+Na)+     | 1 |
| 436.1353 | 436.1347   | 1.33       | 628781  | 25.23    | 28.15           | (M+Na)+     | 1 |
| 437.1381 | 437.1376   | 1.16       | 102995  | 4.13     | 4.64            | (M+Na)+     | 1 |

### 3ra

Cpd. 2: C<sub>24</sub> H<sub>18</sub> N<sub>2</sub> O<sub>4</sub>

Compound Spectra

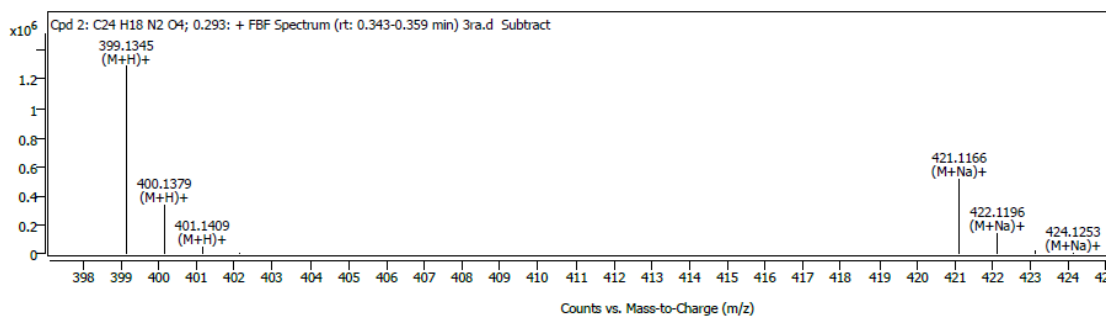

Spectrum Peaks

| m/z      | m/z (Calc) | Diff (ppm) | Abund   | Height % | Height % (Calc) | Ion Species | Z |
|----------|------------|------------|---------|----------|-----------------|-------------|---|
| 399.1345 | 399.1339   | 1.36       | 1290503 | 100.00   | 100.00          | (M+H)+      | 1 |
| 400.1379 | 400.1371   | 1.89       | 335058  | 25.96    | 27.06           | (M+H)+      | 1 |
| 401.1409 | 401.1399   | 2.46       | 47413   | 3.67     | 4.34            | (M+H)+      | 1 |
| 402.1446 | 402.1426   | 4.93       | 6487    | 0.50     | 0.51            | (M+H)+      | 1 |
| 421.1166 | 421.1159   | 1.63       | 515190  | 100.00   | 100.00          | (M+Na)+     | 1 |
| 422.1196 | 422.1191   | 1.16       | 140328  | 27.24    | 27.05           | (M+Na)+     | 1 |
| 423.1226 | 423.1219   | 1.65       | 20526   | 3.98     | 4.34            | (M+Na)+     | 1 |
| 424.1253 | 424.1246   | 1.79       | 3067    | 0.60     | 0.51            | (M+Na)+     | 1 |

### 3sa

Cpd. 4: C22 H22 N2 O5

Compound Spectra

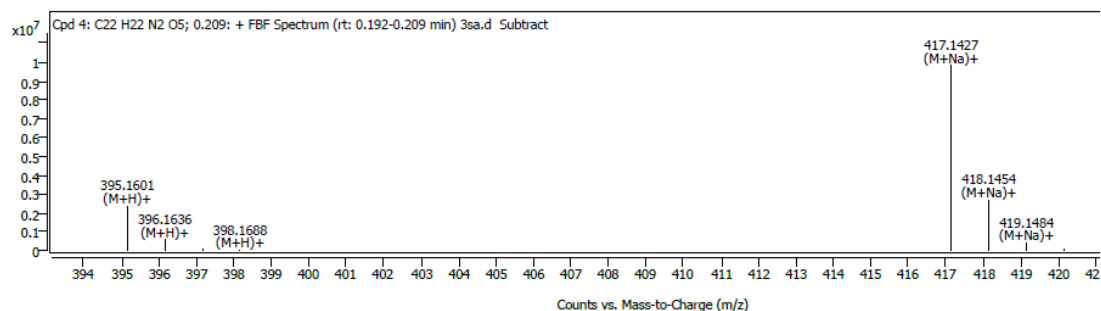

Spectrum Peaks

| m/z      | m/z (Calc) | Diff (ppm) | Abund   | Height % | Height % (Calc) | Ion Species | Z |
|----------|------------|------------|---------|----------|-----------------|-------------|---|
| 395.1601 | 395.1601   | -0.14      | 2376497 | 100.00   | 100.00          | (M+H)+      | 1 |
| 396.1636 | 396.1634   | 0.51       | 574685  | 24.18    | 24.98           | (M+H)+      | 1 |
| 397.1663 | 397.1660   | 0.72       | 87088   | 3.66     | 4.02            | (M+H)+      | 1 |
| 398.1688 | 398.1686   | 0.35       | 9983    | 0.42     | 0.48            | (M+H)+      | 1 |
| 417.1427 | 417.1421   | 1.37       | 9825860 | 100.00   | 100.00          | (M+Na)+     | 1 |
| 418.1454 | 418.1453   | 0.20       | 2701282 | 27.49    | 24.97           | (M+Na)+     | 1 |
| 419.1484 | 419.1479   | 1.00       | 392317  | 3.99     | 4.01            | (M+Na)+     | 1 |
| 420.1486 | 420.1506   | -4.70      | 56345   | 0.57     | 0.48            | (M+Na)+     | 1 |

### 3ab

Cpd. 4: C21 H20 N2 O4

Compound Spectra

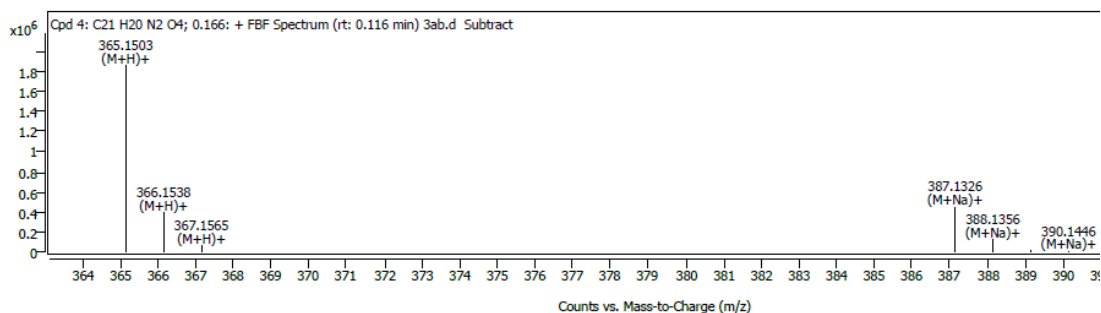

Spectrum Peaks

| m/z      | m/z (Calc) | Diff (ppm) | Abund   | Height % | Height % (Calc) | Ion Species | Z |
|----------|------------|------------|---------|----------|-----------------|-------------|---|
| 365.1503 | 365.1496   | 1.86       | 1856117 | 100.00   | 100.00          | (M+H)+      | 1 |
| 366.1538 | 366.1528   | 2.83       | 391077  | 21.07    | 23.84           | (M+H)+      | 1 |
| 367.1565 | 367.1555   | 2.76       | 59297   | 3.19     | 3.54            | (M+H)+      | 1 |
| 387.1326 | 387.1315   | 2.84       | 449037  | 100.00   | 100.00          | (M+Na)+     | 1 |
| 388.1356 | 388.1347   | 2.21       | 119930  | 26.71    | 23.83           | (M+Na)+     | 1 |
| 389.1385 | 389.1374   | 2.77       | 20687   | 4.61     | 3.54            | (M+Na)+     | 1 |
| 390.1446 | 390.1400   | 11.60      | 1192    | 0.27     | 0.39            | (M+Na)+     | 1 |

### 3ac

Cpd. 4: C21 H20 N2 O5

Compound Spectra

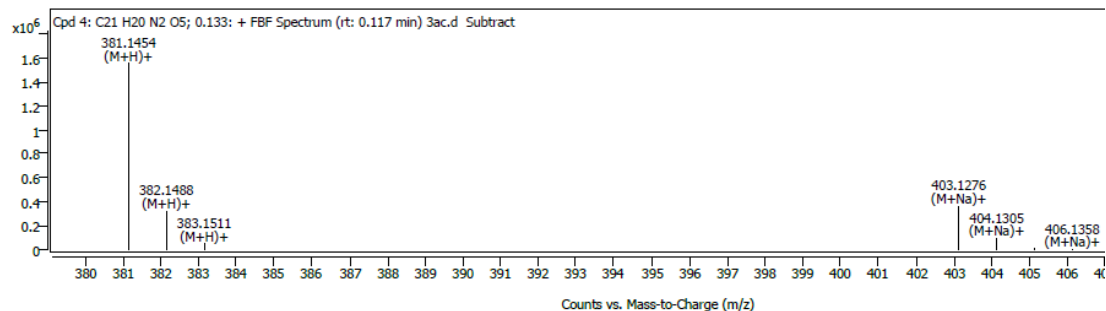

Spectrum Peaks

| m/z      | m/z (Calc) | Diff (ppm) | Abund   | Height % | Height % (Calc) | Ion Species | Z |
|----------|------------|------------|---------|----------|-----------------|-------------|---|
| 381.1454 | 381.1445   | 2.48       | 1551675 | 100.00   | 100.00          | (M+H)+      | 1 |
| 382.1488 | 382.1477   | 2.99       | 321081  | 20.69    | 23.88           | (M+H)+      | 1 |
| 383.1511 | 383.1503   | 2.11       | 50835   | 3.28     | 3.75            | (M+H)+      | 1 |
| 403.1276 | 403.1264   | 2.97       | 363550  | 100.00   | 100.00          | (M+Na)+     | 1 |
| 404.1305 | 404.1296   | 2.09       | 92654   | 25.49    | 23.86           | (M+Na)+     | 1 |
| 405.1336 | 405.1322   | 3.46       | 14261   | 3.92     | 3.75            | (M+Na)+     | 1 |
| 406.1358 | 406.1348   | 2.33       | 1667    | 0.46     | 0.44            | (M+Na)+     | 1 |

### 3ad

Cpd. 1: C20 H17 F N2 O4

Compound Spectra

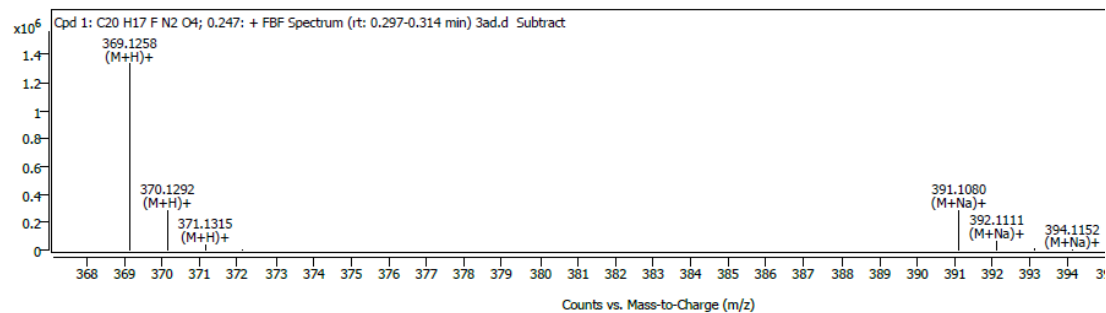

Spectrum Peaks

| m/z      | m/z (Calc) | Diff (ppm) | Abund   | Height % | Height % (Calc) | Ion Species | Z |
|----------|------------|------------|---------|----------|-----------------|-------------|---|
| 369.1258 | 369.1245   | 3.42       | 1333334 | 100.00   | 100.00          | (M+H)+      | 1 |
| 370.1292 | 370.1277   | 3.95       | 284303  | 21.32    | 22.72           | (M+H)+      | 1 |
| 371.1315 | 371.1303   | 3.23       | 38683   | 2.90     | 3.28            | (M+H)+      | 1 |
| 372.1334 | 372.1329   | 1.22       | 4646    | 0.35     | 0.36            | (M+H)+      | 1 |
| 391.1080 | 391.1065   | 3.93       | 285079  | 100.00   | 100.00          | (M+Na)+     | 1 |
| 392.1111 | 392.1096   | 3.85       | 63914   | 22.42    | 22.71           | (M+Na)+     | 1 |
| 393.1132 | 393.1123   | 2.36       | 7775    | 2.73     | 3.28            | (M+Na)+     | 1 |
| 394.1152 | 394.1149   | 0.78       | 1308    | 0.46     | 0.36            | (M+Na)+     | 1 |

### 3ae

Cpd. 3: C<sub>20</sub> H<sub>17</sub> Cl N<sub>2</sub> O<sub>4</sub>

Compound Spectra

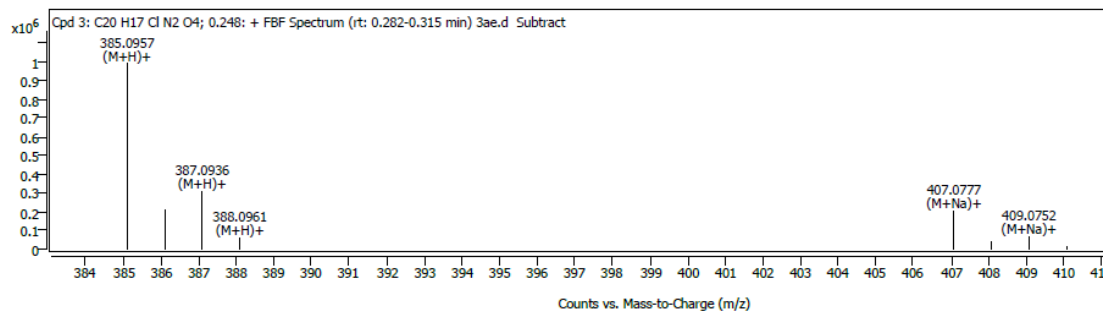

Spectrum Peaks

| m/z      | m/z (Calc) | Diff (ppm) | Abund  | Height % | Height % (Calc) | Ion Species         | Z |
|----------|------------|------------|--------|----------|-----------------|---------------------|---|
| 385.0957 | 385.0950   | 1.82       | 992260 | 100.00   | 100.00          | (M+H) <sup>+</sup>  | 1 |
| 386.0988 | 386.0981   | 1.82       | 207875 | 20.95    | 22.72           | (M+H) <sup>+</sup>  | 1 |
| 387.0936 | 387.0928   | 1.96       | 310207 | 31.26    | 35.28           | (M+H) <sup>+</sup>  | 1 |
| 388.0961 | 388.0956   | 1.29       | 63190  | 6.37     | 7.63            | (M+H) <sup>+</sup>  | 1 |
| 407.0777 | 407.0769   | 1.98       | 204303 | 100.00   | 100.00          | (M+Na) <sup>+</sup> | 1 |
| 408.0806 | 408.0801   | 1.30       | 44278  | 21.67    | 22.71           | (M+Na) <sup>+</sup> | 1 |
| 409.0752 | 409.0748   | 1.02       | 67937  | 33.25    | 35.28           | (M+Na) <sup>+</sup> | 1 |
| 410.0782 | 410.0775   | 1.69       | 14046  | 6.87     | 7.62            | (M+Na) <sup>+</sup> | 1 |

### 3af

Cpd. 1: C<sub>20</sub> H<sub>17</sub> Br N<sub>2</sub> O<sub>4</sub>

Compound Spectra

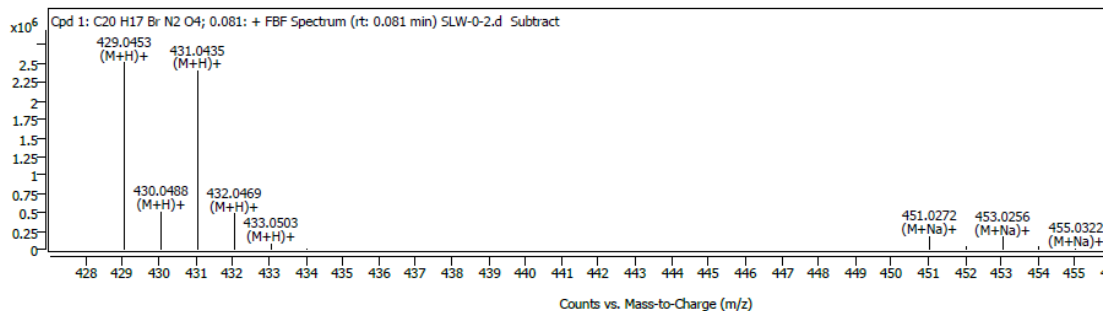

Spectrum Peaks

| m/z      | m/z (Calc) | Diff (ppm) | Abund   | Height % | Height % (Calc) | Ion Species         | Z |
|----------|------------|------------|---------|----------|-----------------|---------------------|---|
| 429.0453 | 429.0444   | 2.07       | 2510871 | 100.00   | 99.44           | (M+H) <sup>+</sup>  | 1 |
| 430.0488 | 430.0476   | 2.79       | 502556  | 20.02    | 22.59           | (M+H) <sup>+</sup>  | 1 |
| 431.0435 | 431.0427   | 1.99       | 2397408 | 95.48    | 100.00          | (M+H) <sup>+</sup>  | 1 |
| 432.0469 | 432.0457   | 2.84       | 476720  | 18.99    | 22.33           | (M+H) <sup>+</sup>  | 1 |
| 433.0503 | 433.0483   | 4.52       | 73401   | 2.92     | 3.21            | (M+H) <sup>+</sup>  | 1 |
| 434.0517 | 434.0509   | 1.92       | 11108   | 0.44     | 0.35            | (M+H) <sup>+</sup>  | 1 |
| 451.0272 | 451.0264   | 1.75       | 169996  | 100.00   | 99.44           | (M+Na) <sup>+</sup> | 1 |
| 452.0310 | 452.0296   | 3.11       | 36238   | 21.32    | 22.58           | (M+Na) <sup>+</sup> | 1 |
| 453.0256 | 453.0246   | 2.22       | 164436  | 96.73    | 100.00          | (M+Na) <sup>+</sup> | 1 |
| 454.0283 | 454.0276   | 1.55       | 38180   | 22.46    | 22.32           | (M+Na) <sup>+</sup> | 1 |
| 455.0322 | 455.0302   | 4.24       | 4771    | 2.81     | 3.21            | (M+Na) <sup>+</sup> | 1 |

### 3ag

Cpd. 3: C21 H17 F3 N2 O4

Compound Spectra

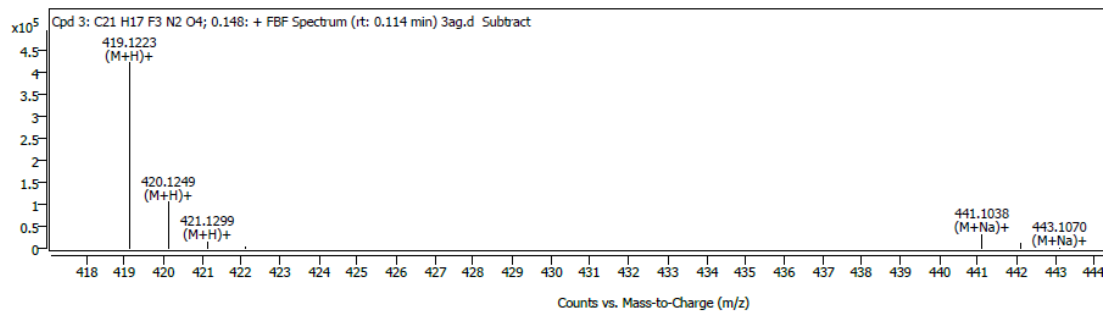

Spectrum Peaks

| m/z      | m/z (Calc) | Diff (ppm) | Abund  | Height % | Height % (Calc) | Ion Species | Z |
|----------|------------|------------|--------|----------|-----------------|-------------|---|
| 419.1223 | 419.1213   | 2.42       | 422257 | 100.00   | 100.00          | (M+H)+      | 1 |
| 420.1249 | 420.1245   | 0.98       | 105402 | 24.96    | 23.80           | (M+H)+      | 1 |
| 421.1299 | 421.1272   | 6.39       | 15265  | 3.62     | 3.53            | (M+H)+      | 1 |
| 422.1331 | 422.1298   | 7.72       | 2548   | 0.60     | 0.39            | (M+H)+      | 1 |
| 441.1038 | 441.1033   | 1.19       | 32696  | 100.00   | 100.00          | (M+Na)+     | 1 |
| 442.1068 | 442.1065   | 0.77       | 10665  | 32.62    | 23.79           | (M+Na)+     | 1 |
| 443.1070 | 443.1091   | -4.83      | 1803   | 5.51     | 3.53            | (M+Na)+     | 1 |

### 3ah

Cpd. 3: C20 H17 N3 O6

Compound Spectra

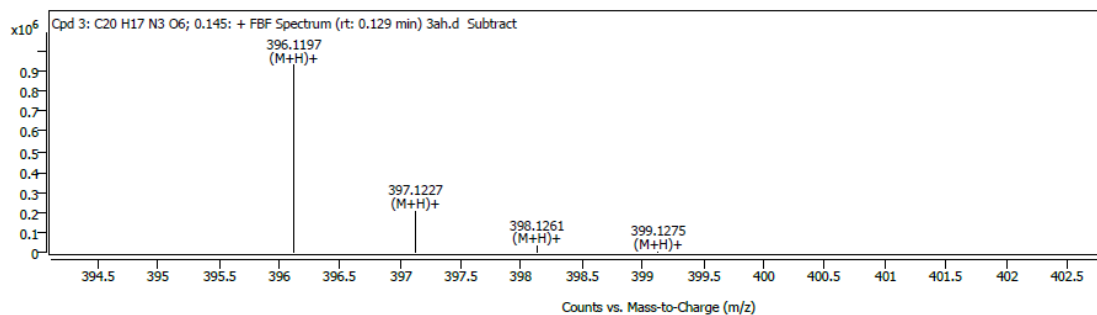

Spectrum Peaks

| m/z      | m/z (Calc) | Diff (ppm) | Abund  | Height % | Height % (Calc) | Ion Species | Z |
|----------|------------|------------|--------|----------|-----------------|-------------|---|
| 396.1197 | 396.1190   | 1.76       | 930224 | 100.00   | 100.00          | (M+H)+      | 1 |
| 397.1227 | 397.1221   | 1.50       | 204059 | 21.94    | 23.16           | (M+H)+      | 1 |
| 398.1261 | 398.1246   | 3.94       | 31346  | 3.37     | 3.80            | (M+H)+      | 1 |
| 399.1275 | 399.1271   | 0.93       | 4808   | 0.52     | 0.47            | (M+H)+      | 1 |



### 3ai

Cpd. 3: C21 H20 N2 O5

Compound Spectra

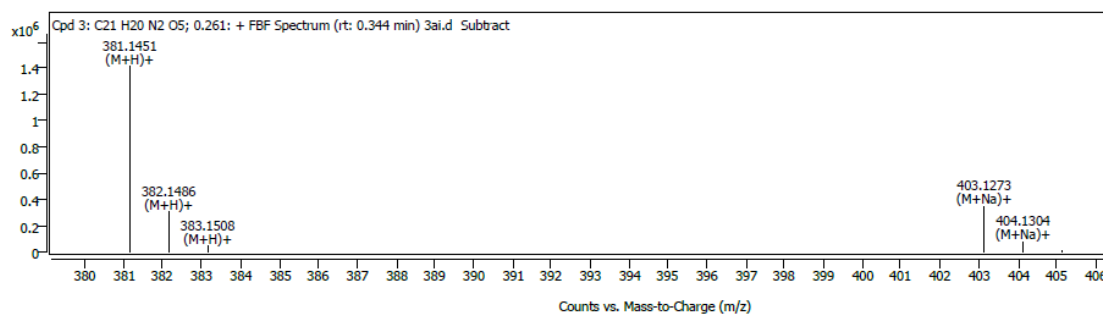

| Spectrum Peaks |            |            |         |          |                 |             |   |
|----------------|------------|------------|---------|----------|-----------------|-------------|---|
| m/z            | m/z (Calc) | Diff (ppm) | Abund   | Height % | Height % (Calc) | Ion Species | Z |
| 381.1451       | 381.1445   | 1.62       | 1416530 | 100.00   | 100.00          | (M+H)+      | 1 |
| 382.1486       | 382.1477   | 2.26       | 306534  | 21.64    | 23.88           | (M+H)+      | 1 |
| 383.1508       | 383.1503   | 1.38       | 46138   | 3.26     | 3.75            | (M+H)+      | 1 |
| 403.1273       | 403.1264   | 2.04       | 349851  | 100.00   | 100.00          | (M+Na)+     | 1 |
| 404.1304       | 404.1296   | 1.98       | 78082   | 22.32    | 23.86           | (M+Na)+     | 1 |
| 405.1336       | 405.1322   | 3.28       | 14605   | 4.17     | 3.75            | (M+Na)+     | 1 |

### 3aj

Cpd. 1: C20 H17 Cl N2 O4

Compound Spectra

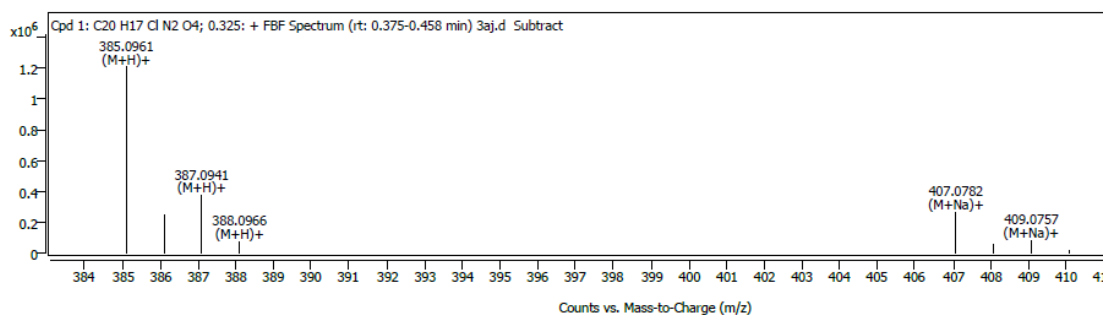

| Spectrum Peaks |            |            |         |          |                 |             |   |
|----------------|------------|------------|---------|----------|-----------------|-------------|---|
| m/z            | m/z (Calc) | Diff (ppm) | Abund   | Height % | Height % (Calc) | Ion Species | Z |
| 385.0961       | 385.0950   | 2.99       | 1209765 | 100.00   | 100.00          | (M+H)+      | 1 |
| 386.0993       | 386.0981   | 3.07       | 252885  | 20.90    | 22.72           | (M+H)+      | 1 |
| 387.0941       | 387.0928   | 3.35       | 374455  | 30.95    | 35.28           | (M+H)+      | 1 |
| 388.0966       | 388.0956   | 2.74       | 77003   | 6.37     | 7.63            | (M+H)+      | 1 |
| 407.0782       | 407.0769   | 3.18       | 265412  | 100.00   | 100.00          | (M+Na)+     | 1 |
| 408.0812       | 408.0801   | 2.84       | 59384   | 22.37    | 22.71           | (M+Na)+     | 1 |
| 409.0757       | 409.0748   | 2.39       | 85743   | 32.31    | 35.28           | (M+Na)+     | 1 |
| 410.0784       | 410.0775   | 2.14       | 20516   | 7.73     | 7.62            | (M+Na)+     | 1 |

### 3ak

#### Cpd. 3: C21 H17 N3 O4

##### Compound Spectra

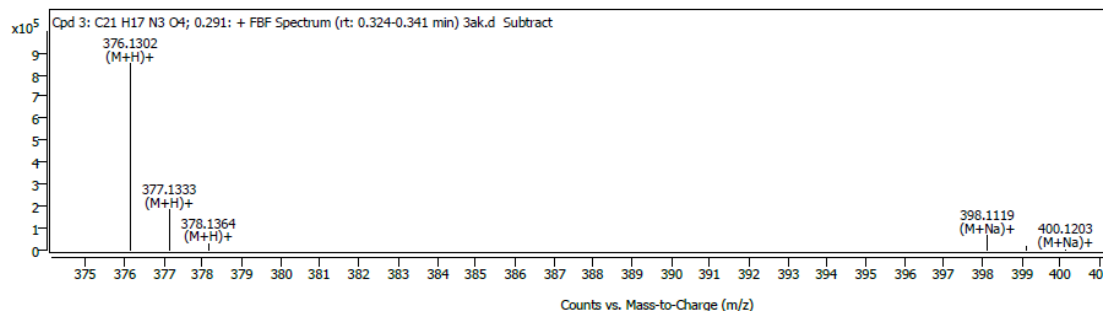

##### Spectrum Peaks

| m/z      | m/z (Calc) | Diff (ppm) | Abund  | Height % | Height % (Calc) | Ion Species | Z |
|----------|------------|------------|--------|----------|-----------------|-------------|---|
| 376.1302 | 376.1292   | 2.63       | 851064 | 100.00   | 100.00          | (M+H)+      | 1 |
| 377.1333 | 377.1323   | 2.66       | 184575 | 21.69    | 24.17           | (M+H)+      | 1 |
| 378.1364 | 378.1349   | 3.93       | 28320  | 3.33     | 3.62            | (M+H)+      | 1 |
| 398.1119 | 398.1111   | 1.82       | 67162  | 100.00   | 100.00          | (M+Na)+     | 1 |
| 399.1149 | 399.1142   | 1.77       | 16041  | 23.88    | 24.16           | (M+Na)+     | 1 |
| 400.1203 | 400.1169   | 8.54       | 2650   | 3.95     | 3.61            | (M+Na)+     | 1 |

### 3al

#### Cpd. 6: C24 H20 N2 O4

##### Compound Spectra

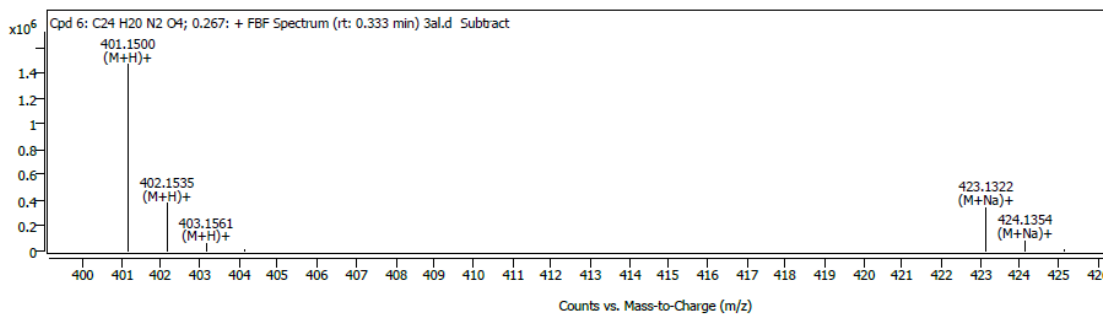

##### Spectrum Peaks

| m/z      | m/z (Calc) | Diff (ppm) | Abund   | Height % | Height % (Calc) | Ion Species | Z |
|----------|------------|------------|---------|----------|-----------------|-------------|---|
| 401.1500 | 401.1496   | 1.14       | 1464729 | 100.00   | 100.00          | (M+H)+      | 1 |
| 402.1535 | 402.1528   | 1.69       | 374857  | 25.59    | 27.08           | (M+H)+      | 1 |
| 403.1561 | 403.1556   | 1.24       | 58139   | 3.97     | 4.35            | (M+H)+      | 1 |
| 404.1584 | 404.1583   | 0.23       | 7844    | 0.54     | 0.52            | (M+H)+      | 1 |
| 423.1322 | 423.1315   | 1.48       | 344077  | 100.00   | 100.00          | (M+Na)+     | 1 |
| 424.1354 | 424.1347   | 1.47       | 84440   | 24.54    | 27.07           | (M+Na)+     | 1 |
| 425.1380 | 425.1375   | 1.15       | 14292   | 4.15     | 4.34            | (M+Na)+     | 1 |

### 3am

Cpd. 6: C18 H16 N2 O5

Compound Spectra

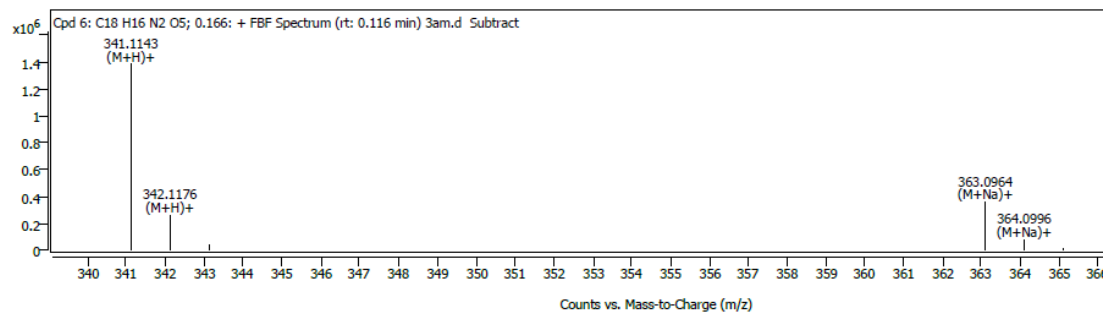

#### Spectrum Peaks

| m/z      | m/z (Calc) | Diff (ppm) | Abund   | Height % | Height % (Calc) | Ion Species | Z |
|----------|------------|------------|---------|----------|-----------------|-------------|---|
| 341.1143 | 341.1132   | 3.25       | 1385281 | 100.00   | 100.00          | (M+H)+      | 1 |
| 342.1176 | 342.1164   | 3.72       | 258615  | 18.67    | 20.58           | (M+H)+      | 1 |
| 343.1208 | 343.1188   | 5.79       | 42447   | 3.06     | 3.04            | (M+H)+      | 1 |
| 363.0964 | 363.0951   | 3.51       | 356436  | 100.00   | 100.00          | (M+Na)+     | 1 |
| 364.0996 | 364.0983   | 3.66       | 79219   | 22.23    | 20.57           | (M+Na)+     | 1 |
| 365.1021 | 365.1008   | 3.74       | 13041   | 3.66     | 3.04            | (M+Na)+     | 1 |

### 3am'

Cpd. 4: C24 H21 N3 O7

Compound Spectra

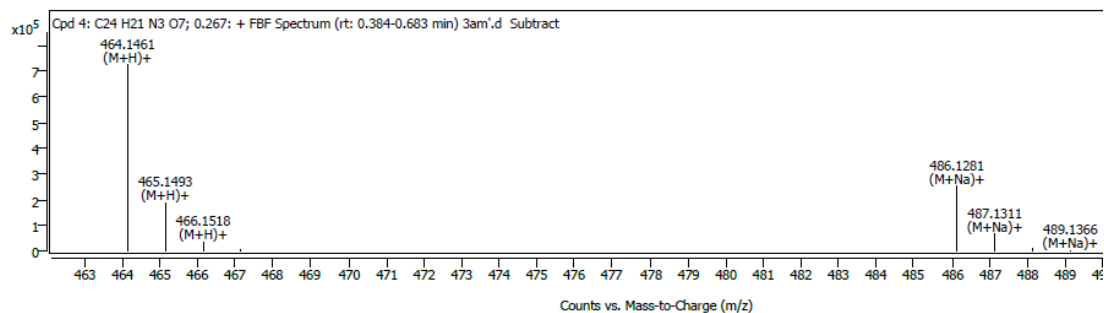

#### Spectrum Peaks

| m/z      | m/z (Calc) | Diff (ppm) | Abund  | Height % | Height % (Calc) | Ion Species | Z |
|----------|------------|------------|--------|----------|-----------------|-------------|---|
| 464.1461 | 464.1452   | 1.98       | 723080 | 100.00   | 100.00          | (M+H)+      | 1 |
| 465.1493 | 465.1484   | 2.06       | 189164 | 26.16    | 27.57           | (M+H)+      | 1 |
| 466.1518 | 466.1509   | 1.87       | 34461  | 4.77     | 5.10            | (M+H)+      | 1 |
| 467.1547 | 467.1535   | 2.68       | 5071   | 0.70     | 0.71            | (M+H)+      | 1 |
| 486.1281 | 486.1272   | 1.98       | 251756 | 100.00   | 100.00          | (M+Na)+     | 1 |
| 487.1311 | 487.1303   | 1.64       | 66188  | 26.29    | 27.56           | (M+Na)+     | 1 |
| 488.1338 | 488.1329   | 1.85       | 12034  | 4.78     | 5.09            | (M+Na)+     | 1 |
| 489.1366 | 489.1354   | 2.33       | 1831   | 0.73     | 0.71            | (M+Na)+     | 1 |

### 3an

1-37 #9 RT: 0.07 AV: 1 NL: 1.45E7  
T: FTMS + p ESI Full lock ms [80.0000-1200.0000]

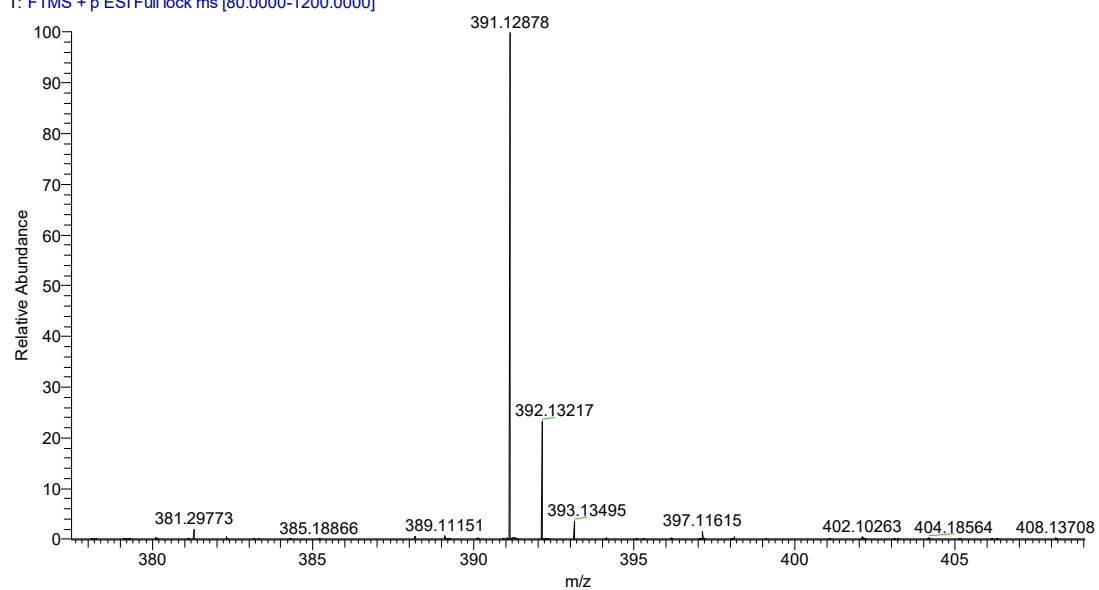

### 3an'

1-36 #9 RT: 0.07 AV: 1 NL: 1.67E6  
T: FTMS + p ESI Full lock ms [80.0000-1200.0000]

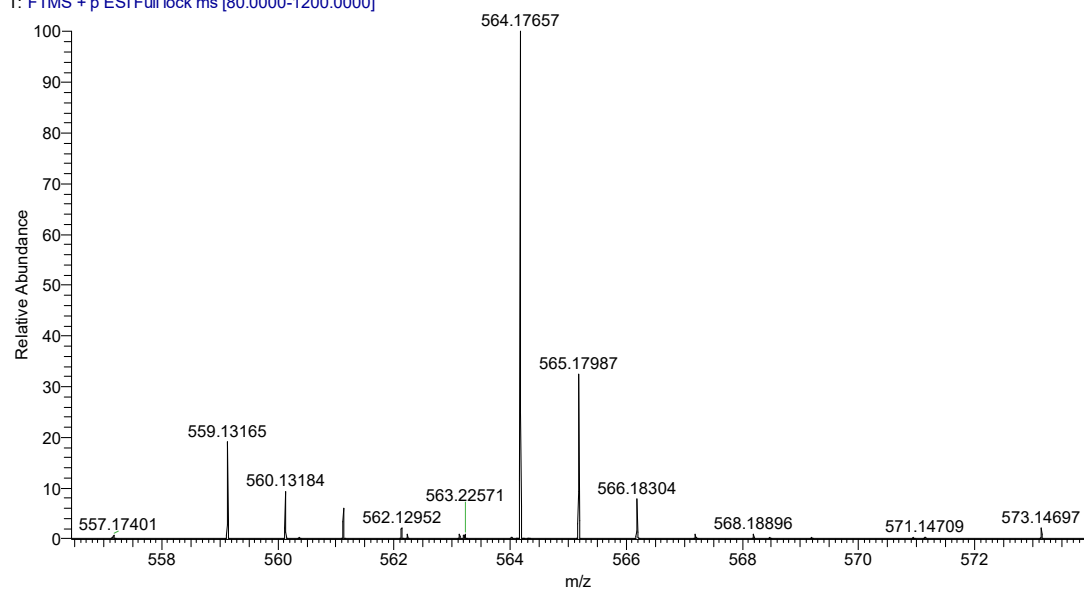

### 3ao

Cpd. 5: C22 H18 N2 O4 S

Compound Spectra

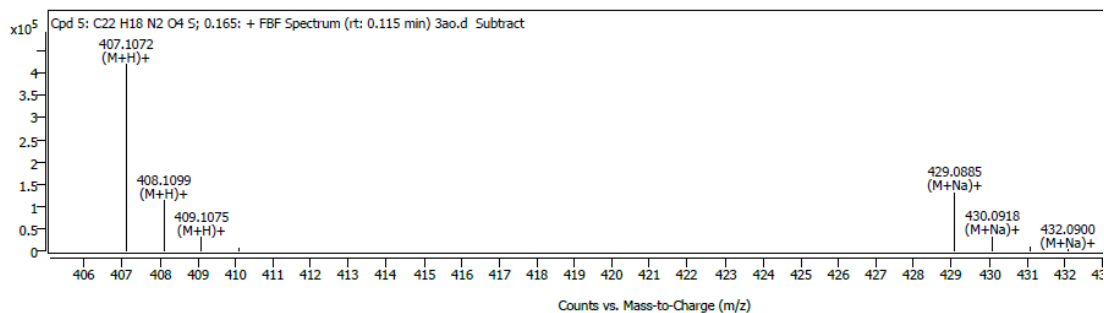

Spectrum Peaks

| m/z      | m/z (Calc) | Diff (ppm) | Abund  | Height % | Height % (Calc) | Ion Species | Z |
|----------|------------|------------|--------|----------|-----------------|-------------|---|
| 407.1072 | 407.1060   | 2.93       | 418326 | 100.00   | 100.00          | (M+H)+      | 1 |
| 408.1099 | 408.1091   | 1.93       | 112496 | 26.89    | 25.69           | (M+H)+      | 1 |
| 409.1075 | 409.1065   | 2.48       | 29766  | 7.12     | 8.46            | (M+H)+      | 1 |
| 410.1082 | 410.1077   | 1.07       | 6707   | 1.60     | 1.57            | (M+H)+      | 1 |
| 429.0885 | 429.0879   | 1.39       | 130840 | 100.00   | 100.00          | (M+Na)+     | 1 |
| 430.0918 | 430.0910   | 1.82       | 32390  | 24.76    | 25.67           | (M+Na)+     | 1 |
| 431.0910 | 431.0884   | 5.90       | 8706   | 6.65     | 8.46            | (M+Na)+     | 1 |
| 432.0900 | 432.0897   | 0.83       | 2292   | 1.75     | 1.57            | (M+Na)+     | 1 |

### 3ao'

Cpd. 4: C32 H25 N3 O5 S2

Compound Spectra

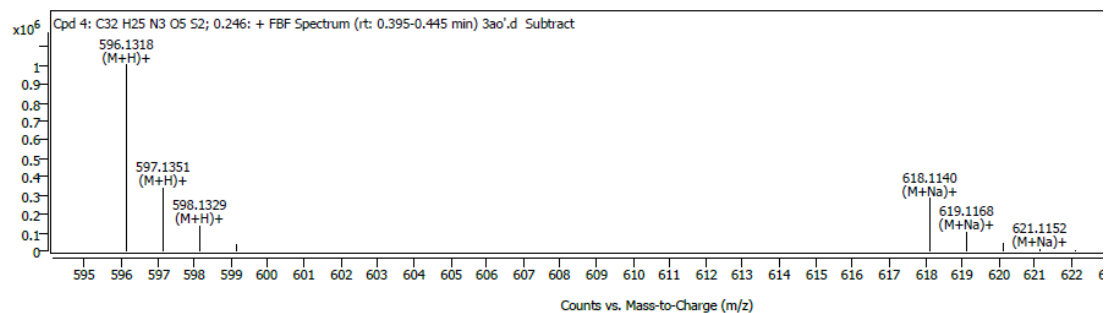

Spectrum Peaks

| m/z      | m/z (Calc) | Diff (ppm) | Abund   | Height % | Height % (Calc) | Ion Species | Z |
|----------|------------|------------|---------|----------|-----------------|-------------|---|
| 596.1318 | 596.1308   | 1.69       | 1002052 | 100.00   | 100.00          | (M+H)+      | 1 |
| 597.1351 | 597.1339   | 2.12       | 339375  | 33.87    | 37.77           | (M+H)+      | 1 |
| 598.1329 | 598.1314   | 2.59       | 133642  | 13.34    | 16.92           | (M+H)+      | 1 |
| 599.1334 | 599.1323   | 1.76       | 35982   | 3.59     | 4.52            | (M+H)+      | 1 |
| 618.1140 | 618.1128   | 1.90       | 283023  | 100.00   | 100.00          | (M+Na)+     | 1 |
| 619.1168 | 619.1158   | 1.62       | 101742  | 35.95    | 37.76           | (M+Na)+     | 1 |
| 620.1146 | 620.1133   | 2.09       | 38391   | 13.56    | 16.91           | (M+Na)+     | 1 |
| 621.1152 | 621.1143   | 1.55       | 10246   | 3.62     | 4.52            | (M+Na)+     | 1 |
| 622.1152 | 622.1138   | 2.24       | 2323    | 0.82     | 1.05            | (M+Na)+     | 1 |

3ap'

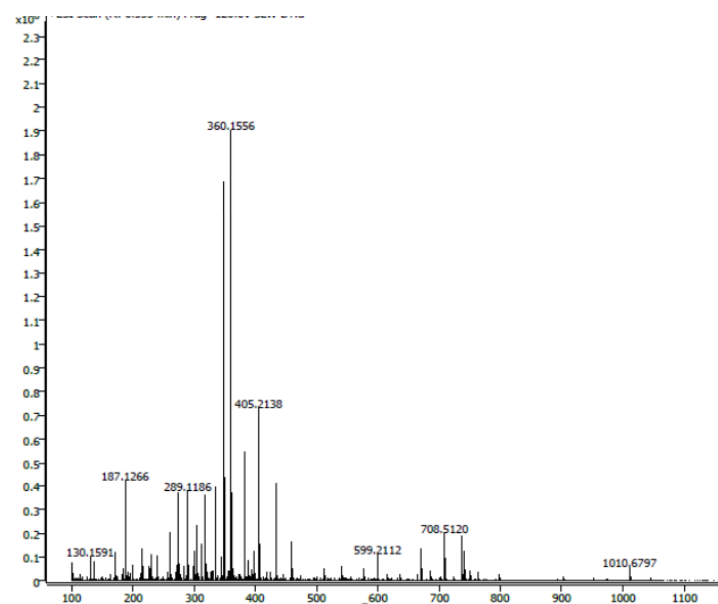

3ama

Cpd. 1: C<sub>26</sub>H<sub>23</sub>N<sub>3</sub>O<sub>6</sub>

Compound Spectra

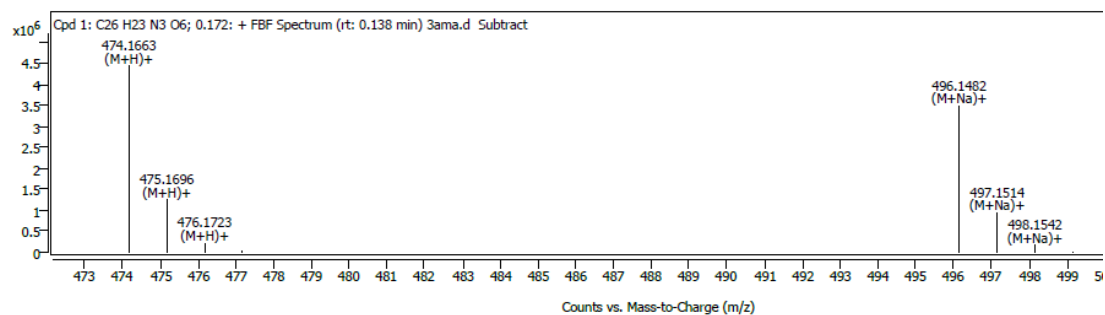

Spectrum Peaks

| m/z      | m/z (Calc) | Diff (ppm) | Abund   | Height % | Height % (Calc) | Ion Species         | Z |
|----------|------------|------------|---------|----------|-----------------|---------------------|---|
| 474.1663 | 474.1660   | 0.77       | 4446637 | 100.00   | 100.00          | (M+H) <sup>+</sup>  | 1 |
| 475.1696 | 475.1691   | 1.09       | 1255418 | 28.23    | 29.72           | (M+H) <sup>+</sup>  | 1 |
| 476.1723 | 476.1718   | 1.12       | 217840  | 4.90     | 5.50            | (M+H) <sup>+</sup>  | 1 |
| 477.1760 | 477.1744   | 3.36       | 31387   | 0.71     | 0.76            | (M+H) <sup>+</sup>  | 1 |
| 496.1482 | 496.1479   | 0.61       | 3486447 | 100.00   | 100.00          | (M+Na) <sup>+</sup> | 1 |
| 497.1514 | 497.1511   | 0.70       | 942748  | 27.04    | 29.71           | (M+Na) <sup>+</sup> | 1 |
| 498.1542 | 498.1537   | 1.01       | 173778  | 4.98     | 5.49            | (M+Na) <sup>+</sup> | 1 |
| 499.1569 | 499.1564   | 1.15       | 20192   | 0.58     | 0.76            | (M+Na) <sup>+</sup> | 1 |

5

3-MX-19 #13 RT: 0.10 AV: 1 NL: 8.05E7  
T: FTMS + p ESI Full lock ms [80.0000-1200.0000]

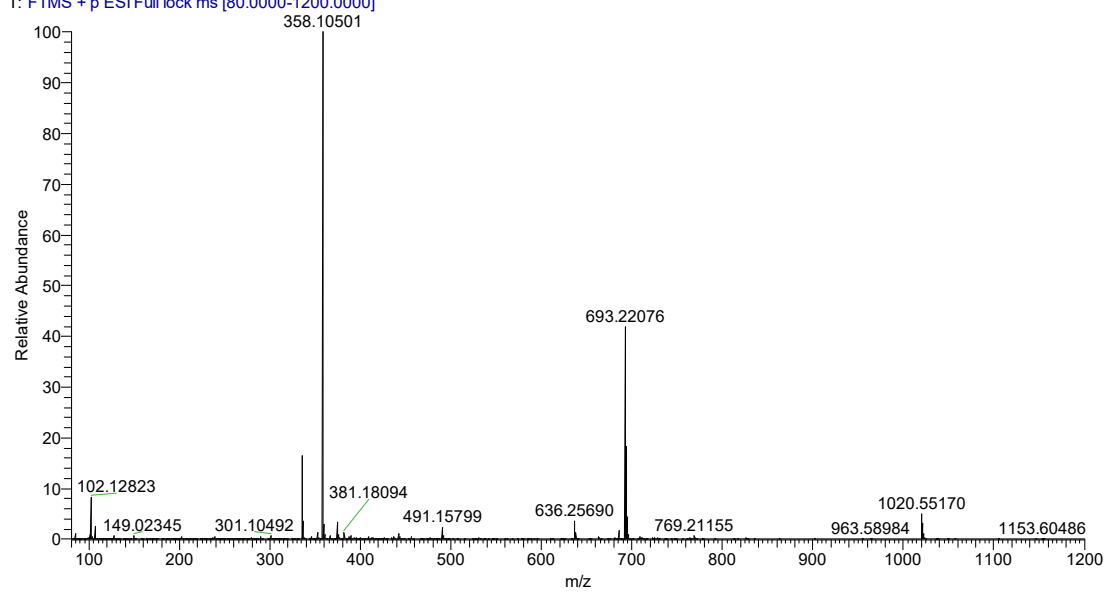

Supplement: d1qo01022k1.pdf [file d1qo01022k1.pdf]
